# Supplementary material
Source: PubMed Central journal article supplement (PMC3869004)

# Nickel/Bis(oxazoline)-Catalyzed Asymmetric Negishi Arylations of Racemic Secondary Benzylic Electrophiles to Generate Enantioenriched 1,1-Diarylalkanes

Hien-Quang Do, E. R. R. Chandrashekar, and Gregory C. Fu\*

Division of Chemistry and Chemical Engineering, California Institute of Technology,  
Pasadena, California 91125, United States

Department of Chemistry, Massachusetts Institute of Technology,  
Cambridge, Massachusetts 02139, United States

## Supporting Information

### Table of Contents

|      |                                      |      |
|------|--------------------------------------|------|
| I.   | General Information                  | S-1  |
| II.  | Preparation of Materials             | S-2  |
| III. | Stereoconvergent Negishi Arylations  | S-5  |
| IV.  | Assignment of Absolute Configuration | S-32 |
| V.   | NMR Spectra                          | S-37 |

### I. General Information

The following reagents were purchased and used as received: NiBr<sub>2</sub>·diglyme (Aldrich), ZnI<sub>2</sub> (Strem; moisture-sensitive), MsCl (Aldrich), NEt<sub>3</sub> (J.T. Baker), LiI (Strem; moisture-sensitive), and THF (Aldrich; anhydrous and inhibitor-free). The Grignard reagents were purchased (Aldrich) or prepared from the reaction of the aryl iodide with isopropylmagnesium chloride (Aldrich; 2.0 M in THF). CH<sub>2</sub>Cl<sub>2</sub> was dried in a solvent-purification system with the aid of activated alumina. All reactions were carried out in oven-dried glassware under an inert atmosphere.

<sup>1</sup>H and <sup>13</sup>C NMR data were collected on a Varian Inova 500 spectrometer at ambient temperature. HPLC analyses were carried out on an Agilent 1100 Series system with Daicel CHIRALCEL® columns or Daicel CHIRALPAK® columns (I.D. 4.6 mm, column length 250 mm, particle size 3 μm or 5 μm). GC analyses were carried out on an Agilent 6890 Series system with a DB-1 column (I.D. 0.25 mm, column length 30 m) and an Agilent 6850 Series system with a G-TA column (I.D. 0.25 mm, column length 30 m). GC-MS analyses were performed on an Agilent 6980 Series system equipped with an Agilent 5973 Network Mass Selective Detector. SFC analyses were performed on a Thar SFC system equipped with an Agilent 1315B DAD detector using Daicel CHIRALCEL® columns or Daicel CHIRALPAK® columns (I.D. 4.6 mm, column length 250 mm, particle size 3 μm or 5 μm) at 40 °C.

## II. Preparation of Materials

These procedures have not been optimized.

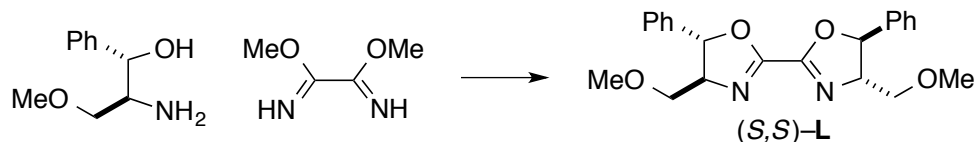

**(4*S*,4'*S*,5*S*,5'*S*)-4,4'-Bis(methoxymethyl)-5,5'-diphenyl-4,4',5,5'-tetrahydro-2,2'-bioxazole.** A solution of (1*S*,2*S*)-(+)-2-amino-3-methoxy-1-phenyl-1-propanol (Aldrich; 1.0 g, 5.5 mmol) and dimethyl oxalimidate<sup>1</sup> (305 mg, 2.63 mmol; 0.48 equiv) in CH<sub>2</sub>Cl<sub>2</sub> (10 mL) in a sealed 20-mL vial was stirred at 55 °C for three days. The solvent was then removed, and the residue was purified by flash chromatography (2% NEt<sub>3</sub> in EtOAc/hexanes 4/6). The purified product was re-dissolved in anhydrous CH<sub>2</sub>Cl<sub>2</sub>, and then the solvent was removed. The product was dried under vacuum at 50 °C for two days, affording 717 mg (72% yield) of a light-tan viscous oil.

<sup>1</sup>H NMR (500 MHz, CDCl<sub>3</sub>) δ 7.43 – 7.28 (m, 10H), 5.59 (d, *J* = 7.9 Hz, 2H), 4.44 – 4.36 (m, 2H), 3.74 (dd, *J* = 9.7, 4.1 Hz, 2H), 3.64 (dd, *J* = 9.7, 6.4 Hz, 2H), 3.42 (s, 6H).

<sup>13</sup>C NMR (126 MHz, CDCl<sub>3</sub>) δ 154.9, 139.3, 128.8, 128.5, 125.9, 84.9, 74.8, 73.3, 59.3.

FT-IR (neat) 3291, 3063, 3033, 2984, 2927, 2891, 2828, 1676, 1620, 1496, 1456, 1382, 1343, 1266, 1224, 1192, 1128, 1011, 957, 915, 847, 759 cm<sup>-1</sup>.

MS (ESI) *m/z* ([*M* + *H*]<sup>+</sup>) calcd for C<sub>22</sub>H<sub>25</sub>N<sub>2</sub>O<sub>4</sub>: 381.2, found: 381.2.

[α]<sub>D</sub><sup>25</sup> = -28.0° (*c* = 1.00, CHCl<sub>3</sub>).

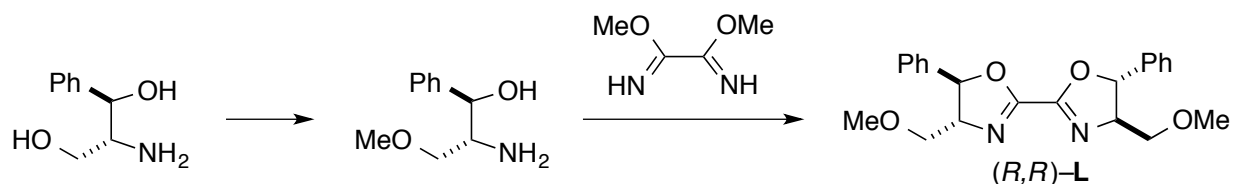

**(4*R*,4'*R*,5*R*,5'*R*)-4,4'-Bis(methoxymethyl)-5,5'-diphenyl-4,4',5,5'-tetrahydro-2,2'-bioxazole.** A suspension of KH (1.32 g, 33 mmol) in THF was added dropwise to a stirred solution of (1*R*,2*R*)-2-amino-1-phenylpropane-1,3-diol (Wako; 5.0 g, 30 mmol) in dry THF (90 mL) at r.t. The resulting mixture was stirred at r.t. for 12 h. Next, CH<sub>3</sub>I (2.4 mL, 36 mmol) was added dropwise over 2 min. The resulting mixture was stirred for 4 h, and then the reaction was carefully quenched by the addition of brine (50 mL). The reaction mixture was extracted with Et<sub>2</sub>O (100 mL x 3), the solvent was removed from the organic extract, and the residue was purified by reverse-phase chromatography, which afforded the desired monomethylated

- (1) This compound was prepared by oxidation of diaminomaleonitrile (Webster, O. W.; Hartter, D. R.; Begland, R. W.; Sheppard, W. A.; Cairncross, A. *J. Org. Chem.* **1972**, *37*, 4133–4136), followed by displacement of cyanide with methoxide (Begland, R. W.; Hartter, D. R. *J. Org. Chem.* **1972**, *37*, 4136–4145).

product (607 mg, 11% yield). The methylated (*R,R*)-aminoalcohol was then reacted with dimethyl oxalimidate following the procedure described above for (*S,S*)-L, which furnished (*R,R*)-L (412 mg, 69% yield).

<sup>1</sup>H NMR (500 MHz, CDCl<sub>3</sub>) δ 7.42 – 7.28 (m, 10H), 5.59 (d, *J* = 7.8 Hz, 2H), 4.44 – 4.36 (m, 2H), 3.74 (dd, *J* = 9.7, 4.1 Hz, 2H), 3.64 (dd, *J* = 9.7, 6.4 Hz, 2H), 3.42 (s, 6H).

<sup>13</sup>C NMR (126 MHz, CDCl<sub>3</sub>) δ 154.9, 139.3, 128.8, 128.5, 125.9, 84.9, 74.8, 73.3, 59.3.

FT-IR (neat) 3291, 3063, 3033, 2984, 2927, 2891, 2828, 1677, 1622, 1496, 1456, 1382, 1343, 1266, 1224, 1192, 1123, 1011, 957, 915, 847, 759 cm<sup>-1</sup>.

MS (ESI) *m/z* ([*M* + *H*]<sup>+</sup>) calcd for C<sub>22</sub>H<sub>25</sub>N<sub>2</sub>O<sub>4</sub>: 381.2, found: 381.2.

[α]<sub>D</sub><sup>25</sup> = +24.5° (*c* = 1.00, CHCl<sub>3</sub>).

**Preparation of benzylic alcohols.** The following alcohols are commercially available: 1-phenylethanol (Aldrich), 1-phenylpropanol (Aldrich), 1-phenylbutanol (TCI), and 1-phenylpentanol (Alfa).

**General Procedure A: Reduction of an aryl ketone by NaBH<sub>4</sub>.** A 100-mL round-bottom flask was charged with the ketone (10 mmol) and a mixture of 1,2-dichloroethane / methanol (1:1; 15 mL). NaBH<sub>4</sub> (2.0 equiv) was added portionwise to this stirred solution so as to maintain the reaction temperature around r.t. The resulting mixture was stirred at r.t. for 2 h, and then it was transferred to a separatory funnel with the aid of water (20 mL). The aqueous layer was extracted with CH<sub>2</sub>Cl<sub>2</sub> (60 mL x 2), and the combined organic layers were washed with brine (20 mL), dried over MgSO<sub>4</sub>, and concentrated under vacuum to furnish the benzylic alcohol. In most cases, the alcohol was generated in high purity and used without further purification.

**General Procedure B: Addition of a Grignard reagent to an aldehyde.** A 100-mL round-bottom flask was charged with the aldehyde (10 mmol), the flask was evacuated and backfilled with nitrogen (three cycles), and then THF (dry; 10 mL) was added. The resulting solution was cooled in an ice bath, and then the Grignard reagent (in Et<sub>2</sub>O or THF; 1.3 equiv) was added dropwise. Then, the ice bath was removed, and the reaction mixture was stirred at r.t. for 3 h. Next, the reaction mixture was cooled in an ice bath, and the reaction was carefully quenched by the addition of a saturated solution of NH<sub>4</sub>Cl (20 mL). The resulting mixture was transferred to a separatory funnel, and the aqueous layer was extracted with Et<sub>2</sub>O (50 mL x 3). The combined organic layers were dried over MgSO<sub>4</sub> and concentrated under vacuum, and then the residue was purified by column chromatography.

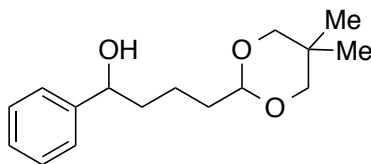

**4-(5,5-Dimethyl-1,3-dioxan-2-yl)-1-phenylbutan-1-ol.** This compound was prepared according to General Procedure B, using 4-(5,5-dimethyl-1,3-dioxan-2-yl)butanal and phenylmagnesium bromide. The product was obtained as a colorless oil (2.11 g, 80% yield).

<sup>1</sup>H NMR (500 MHz, CDCl<sub>3</sub>) δ 7.37 – 7.23 (m, 5H), 4.69 – 4.63 (m, 1H), 4.40 (t, *J* = 5.0 Hz, 1H), 3.60 – 3.55 (m, 2H), 3.42 – 3.36 (m, 2H), 2.01 (d, *J* = 3.3 Hz, 1H), 1.89 – 1.62 (m, 4H), 1.64 – 1.49 (m, 1H), 1.50 – 1.36 (m, 1H), 1.17 (s, 3H), 0.71 (s, 3H).

$^{13}\text{C}$  NMR (126 MHz,  $\text{CDCl}_3$ )  $\delta$  144.8, 128.4, 127.5, 125.9, 102.0, 74.4, 38.9, 34.5, 30.1, 23.0, 21.8, 20.4.

FT-IR (neat) 3435, 2952, 2848, 1603, 1493, 1471, 1453, 1394, 1362, 1311, 1237, 1173, 1133, 1102, 1014, 973, 913, 895, 836, 791, 762  $\text{cm}^{-1}$ .

MS (EI)  $m/z$  ( $[\text{M} - \text{H}_2\text{O}]^+$ ) calcd for  $\text{C}_{16}\text{H}_{22}\text{O}_2$ : 246.2, found: 246.1.

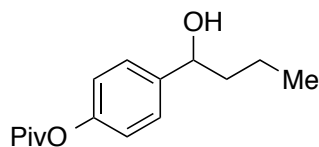

**4-(1-Hydroxybutyl)phenyl pivalate.** This compound was prepared according to General Procedure A, using 4-butyrylphenyl pivalate. The product was obtained as a white solid (2.17 g, 87% yield).

$^1\text{H}$  NMR (500 MHz,  $\text{CDCl}_3$ )  $\delta$  7.38 – 7.30 (m, 2H), 7.07 – 6.99 (m, 2H), 4.71 – 4.64 (m, 1H), 1.89 (d,  $J = 2.5$  Hz, 1H), 1.83 – 1.60 (m, 2H), 1.50 – 1.20 (m, 2H), 1.35 (s, 9H), 0.92 (t,  $J = 7.4$  Hz, 3H).

$^{13}\text{C}$  NMR (126 MHz,  $\text{CDCl}_3$ )  $\delta$  177.1, 150.3, 142.2, 126.9, 121.4, 73.9, 41.2, 39.1, 27.1, 19.0, 13.9.

FT-IR (neat) 3399, 2959, 2933, 2873, 1752, 1606, 1507, 1480, 1459, 1396, 1279, 1200, 1165, 1118, 1029, 1016, 897, 852  $\text{cm}^{-1}$ .

MS (EI)  $m/z$  ( $[\text{M} - \text{H}_2\text{O}]^+$ ) calcd for  $\text{C}_{15}\text{H}_{20}\text{O}_2$ : 232.2, found: 232.0.

### III. Stereoconvergent Negishi Arylations

#### Method A:

Preparation of the nucleophile (for a glovebox-free procedure, see below): In a nitrogen-filled glovebox, isopropylmagnesium chloride (2.0 M in THF; 1.6 mL, 3.2 mmol) was added dropwise over 1 min to a solution of the aryl iodide (3.2 mmol) in dry THF (anhydrous and inhibitor-free in a Sure/Seal bottle from Aldrich) in a 20-mL vial (at  $-20\text{ }^{\circ}\text{C}$  for aryl iodides that contain potentially reactive functional groups; otherwise, at r.t.). The reaction mixture was stirred at the same temperature for 1 h, and then a solution of  $\text{ZnI}_2$  (1.22 g, 3.84 mmol; in 4.5 mL of THF) was added. The resulting suspension was stirred vigorously for 1 h at r.t.

Preparation of the catalyst (half of the material was used for each of two reactions; for a glovebox-free procedure, see below): In a nitrogen-filled glovebox, a 20-mL vial was charged with bis(oxazoline) ligand **L** (70 mg, 0.184 mmol),  $\text{NiBr}_2 \cdot \text{diglyme}$  (45 mg, 0.126 mmol), and dry  $\text{CH}_2\text{Cl}_2$  (3.5 mL). The resulting mixture was stirred at r.t. for 30–45 min.

Preparation of the electrophile (conducted without a glovebox): The benzylic alcohol (2.8 mmol),  $\text{NEt}_3$  (0.507 mL, 3.64 mmol), and dry  $\text{CH}_2\text{Cl}_2$  (6.2 mL) were combined in a 20-mL vial. The vial was then flushed with nitrogen and capped. The vial cap was wrapped with electrical tape, and the vial was placed in a cryocool at  $-15$  to  $-10\text{ }^{\circ}\text{C}$ . The mixture was stirred for 5 min, and then mesyl chloride (0.24 mL, 3.08 mmol) was added in one portion by syringe, which resulted in the immediate precipitation of a white solid. The mixture was stirred at  $-15$  to  $-10\text{ }^{\circ}\text{C}$  for 30 min, and then it was filtered through an acrodisc into an empty, nitrogen-flushed vial that was capped with a PTFE-lined septum. The filtrate was kept at  $-15$  to  $-10\text{ }^{\circ}\text{C}$ .

Cross-coupling (for a glovebox-free procedure, see below): In a nitrogen-filled glovebox, a 20-mL vial was charged with  $\text{LiI}$  (ground; 375 mg, 2.8 mmol) and one-half of the catalyst suspension prepared above (1.75 mL). The vial was tightly sealed with a PTFE-lined septum cap and taken out of the glovebox. The vial cap was wrapped with electrical tape, and then the vial was placed in a cryocool at the indicated temperature ( $\sim -40\text{ }^{\circ}\text{C}$ ; see below). The solution of the electrophile (1.75 mL, 0.70 mmol) was added by syringe in one portion. After several minutes, the solution of the nucleophile (1.5–1.7 equiv; 3.5–4.0 mL) was added dropwise over one minute, and the septum cap was then covered with grease. The resulting suspension was stirred for 36 h. Next, the reaction was quenched with ethanol (1.5 mL) and stirred for 5 min at the same temperature, before it was allowed to warm to r.t. The mixture was diluted with  $\text{Et}_2\text{O}$  (150 mL) and washed with brine (40 mL). The aqueous phase was extracted with  $\text{Et}_2\text{O}$  (75 mL), and the combined organic layers were dried over  $\text{MgSO}_4$  and concentrated. The residue was purified by column chromatography (Biotage).

#### Method B:

Preparation of the nucleophile: Same as Method A.

Preparation of the catalyst: Same as Method A.

Preparation of the electrophile (conducted without a glovebox): Same as Method A, except that dry THF (inhibitor-free; 6.2 mL) was employed as the solvent. Method B was used when the triethylammonium salt did not entirely precipitate from  $\text{CH}_2\text{Cl}_2$ .

Cross-coupling (for a glovebox-free procedure, see below): In a nitrogen-filled glovebox, a 20-mL vial was charged with  $\text{LiI}$  (ground; 375 mg, 2.8 mmol),  $\text{CH}_2\text{Cl}_2$  (3.0 mL), and one-half of

the catalyst suspension prepared above (1.75 mL). The remainder of the procedure is the same as Method A, except that the electrophile was a solution in THF, rather than CH<sub>2</sub>Cl<sub>2</sub>.

**Gram-scale reaction:** The cross-coupling of 1-phenylpropyl mesylate with 4-methoxyphenylzinc iodide (Table 2, Entry 2) was conducted on a 7-mmol scale in a 100-mL round-bottom flask, according to method A. After column chromatography (hexanes → 25% CH<sub>2</sub>Cl<sub>2</sub>/hexanes), the product was obtained as a colorless oil (1.40 g, 89% yield, 95% ee).

**Glovebox-free procedure:** The cross-coupling of 1-phenylpropyl mesylate with 4-methoxyphenylzinc iodide (Table 2, Entry 2) was conducted without the use of a glovebox.

Preparation of the nucleophile: A 20-mL vial was charged with the aryl iodide (3.2 mmol), tightly sealed with a PTFE-lined septum cap, and then evacuated/backfilled with nitrogen (three cycles). Dry THF (3.5 mL) was added, followed by the dropwise addition of isopropylmagnesium chloride (2.0 M in THF; 1.6 mL, 3.2 mmol) at r.t. This reaction mixture was stirred for 1 h. In a separate 20-mL vial, a solution of ZnI<sub>2</sub> (1.22 g, 3.84 mmol) in THF (4.5 mL) was prepared in a similar manner under nitrogen, and this solution of ZnI<sub>2</sub> was then added dropwise to the solution of the Grignard reagent. The resulting suspension was stirred vigorously for 1 h.

Preparation of the catalyst: A 20-mL vial was charged with bis(oxazoline) ligand L (70 mg, 0.184 mmol) and NiBr<sub>2</sub>·diglyme (45 mg, 0.126 mmol). The vial was tightly sealed with a PTFE-lined septum cap and then evacuated/backfilled with nitrogen (three cycles). Dry CH<sub>2</sub>Cl<sub>2</sub> (3.5 mL) was added, and the suspension was stirred at r.t. for at least 30 min.

Preparation of the electrophile: Same as Method A.

Cross-coupling reaction: A 20-mL vial was charged with LiI (ground; 375 mg, 2.8 mmol), tightly sealed with a PTFE-lined septum cap, and then evacuated/backfilled with nitrogen (three cycles). Next, one-half of the catalyst suspension (1.75 mL) was added by syringe, the vial cap was wrapped with electrical tape, and then the vial was placed in a cryocool at -45 °C. The remainder of the procedure is the same as Method A. After column chromatography (hexanes → 25% CH<sub>2</sub>Cl<sub>2</sub>/hexanes), the product was obtained as a colorless oil (126 mg, 80% yield; 94% ee).

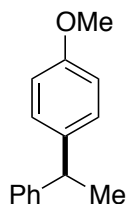

**(S)-1-Methoxy-4-(1-phenylethyl)benzene (Table 2, Entry 1).** The title compound was prepared according to General Method A: 1-Phenylethyl mesylate (0.70 mmol), 4-methoxyphenylzinc iodide (1.7 equiv), -45 °C. The product was purified by column chromatography (hexanes → 25% CH<sub>2</sub>Cl<sub>2</sub>/hexanes). Colorless oil. First run: 129 mg (87%; 88% ee). Second run: 131 mg (88%; 88% ee).

The ee was determined by SFC on a CHIRALPAK AD-H column (3% MeOH in CO<sub>2</sub>, 2.5 mL/min) with t<sub>r</sub> = 2.88 min (major), 3.25 min (minor).

$^1\text{H}$  NMR (500 MHz,  $\text{CDCl}_3$ )  $\delta$  7.33 – 7.10 (m, 7H), 6.88 – 6.78 (m, 2H), 4.11 (q,  $J = 7.2$  Hz, 1H), 3.78 (s, 3H), 1.62 (d,  $J = 7.2$  Hz, 3H).

$^{13}\text{C}$  NMR (126 MHz,  $\text{CDCl}_3$ )  $\delta$  158.0, 146.9, 138.7, 128.7, 128.5, 127.7, 126.1, 113.9, 55.4, 44.1, 22.2.

FT-IR (neat) 3060, 3026, 2999, 2964, 2930, 2905, 2872, 2833, 1612, 1583, 1511, 1494, 1452, 1373, 1302, 1287, 1246, 1177, 1117, 1035, 1027, 832, 771, 727  $\text{cm}^{-1}$ .

MS (EI)  $m/z$  ( $\text{M}^+$ ) calcd for  $\text{C}_{15}\text{H}_{16}\text{O}$ : 212.1, found: 212.0.

$[\alpha]_{\text{D}}^{25} = +8.7^\circ$  ( $c = 1.00$ ,  $\text{CHCl}_3$ ).

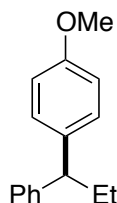

**(S)-1-Methoxy-4-(1-phenylpropyl)benzene (Table 2, Entry 2).** The title compound was prepared according to General Method A: 1-Phenylpropyl mesylate (0.70 mmol), 4-methoxyphenylzinc iodide (1.7 equiv),  $-45^\circ\text{C}$ . The product was purified by column chromatography (hexanes  $\rightarrow$  25%  $\text{CH}_2\text{Cl}_2$ /hexanes). Colorless oil. First run: 147 mg (93%; 94% ee). Second run: 144 mg (91%; 94% ee).

The ee was determined by SFC on a CHIRALPAK AD-H column (2% MeOH in  $\text{CO}_2$ , 2.5 mL/min) with  $t_r = 3.62$  min (major), 4.44 min (minor).

$^1\text{H}$  NMR (500 MHz,  $\text{CDCl}_3$ )  $\delta$  7.30 – 7.12 (m, 7H), 6.84 – 6.80 (m, 2H), 3.77 (s, 3H), 3.74 (t,  $J = 7.8$  Hz, 1H), 2.10 – 1.99 (m, 2H), 0.89 (t,  $J = 7.3$  Hz, 3H).

$^{13}\text{C}$  NMR (126 MHz,  $\text{CDCl}_3$ )  $\delta$  158.0, 145.7, 137.5, 128.9, 128.5, 128.0, 126.0, 113.9, 55.4, 52.5, 28.9, 13.0.

FT-IR (neat) 3060, 3026, 2959, 2930, 2872, 2833, 1611, 1583, 1511, 1494, 1452, 1377, 1302, 1248, 1177, 1119, 1038, 819, 782, 761, 726  $\text{cm}^{-1}$ .

MS (EI)  $m/z$  ( $\text{M}^+$ ) calcd for  $\text{C}_{16}\text{H}_{18}\text{O}$ : 226.1, found: 226.1.

$[\alpha]_{\text{D}}^{25} = +5.8^\circ$  ( $c = 1.00$ ,  $\text{CHCl}_3$ ).

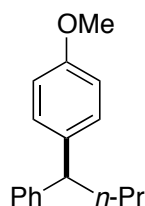

**(S)-1-Methoxy-4-(1-phenylbutyl)benzene (Table 2, Entry 3).** The title compound was prepared according to General Method A: 1-Phenylbutyl mesylate (0.70 mmol), 4-methoxyphenylzinc iodide (1.7 equiv),  $-45^\circ\text{C}$ . The product was purified by column chromatography (hexanes  $\rightarrow$  25%  $\text{CH}_2\text{Cl}_2$ /hexanes). Colorless oil. First run: 153 mg (91%; 94% ee). Second run: 150 mg (89%; 94% ee).

The ee was determined by SFC on a CHIRALPAK AD-H column (2% MeOH in CO<sub>2</sub>, 2.5 mL/min) with t<sub>r</sub> = 3.25 min (major), 3.71 min (minor).

<sup>1</sup>H NMR (500 MHz, CDCl<sub>3</sub>) δ 7.32 – 7.12 (m, 7H), 6.87 – 6.77 (m, 2H), 3.86 (t, J = 7.8 Hz, 1H), 3.77 (s, 3H), 2.04 – 1.93 (m, 2H), 1.33 – 1.20 (m, 2H), 0.92 (t, J = 7.4 Hz, 3H).

<sup>13</sup>C NMR (126 MHz, CDCl<sub>3</sub>) δ 157.9, 145.9, 137.6, 128.9, 128.5, 127.9, 126.0, 113.9, 55.4, 50.3, 38.3, 21.3, 14.2.

FT-IR (neat) 3060, 3026, 2999, 2955, 2930, 2870, 2833, 1610, 1583, 1511, 1494, 1463, 1452, 1378, 1302, 1249, 1177, 1119, 1067, 1037, 851, 824, 803, 784, 750, 726 cm<sup>-1</sup>.

MS (EI) *m/z* (M<sup>+</sup>) calcd for C<sub>17</sub>H<sub>20</sub>O: 240.1, found: 240.1.

[α]<sub>D</sub><sup>25</sup> = +6.4° (c = 1.00, CHCl<sub>3</sub>).

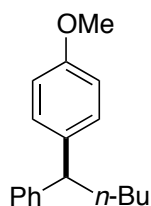

**(S)-1-Methoxy-4-(1-phenylpentyl)benzene (Table 2, Entry 4).** The title compound was prepared according to General Method A: 1-Phenylpentyl mesylate (0.70 mmol), 4-methoxyphenylzinc iodide (1.7 equiv), -45 °C. The product was purified by column chromatography (hexanes → 25% CH<sub>2</sub>Cl<sub>2</sub>/hexanes). Colorless oil. First run: 148 mg (83%; 95% ee). Second run: 145 mg (82%; 95% ee).

The ee was determined by HPLC on a CHIRALCEL OJ-H column (2% *i*-PrOH/hexanes, 1.0 mL/min) with t<sub>r</sub> = 13.88 min (major), 16.45 min (minor).

<sup>1</sup>H NMR (500 MHz, CDCl<sub>3</sub>) δ 7.30 – 7.12 (m, 7H), 6.85 – 6.79 (m, 2H), 3.83 (t, J = 7.8 Hz, 1H), 3.77 (s, 3H), 2.05 – 1.96 (m, 2H), 1.39 – 1.29 (m, 2H), 1.28 – 1.19 (m, 2H), 0.86 (t, J = 7.3 Hz, 3H).

<sup>13</sup>C NMR (126 MHz, CDCl<sub>3</sub>) δ 158.0, 146.0, 137.7, 128.9, 128.5, 127.89, 126.0, 113.9, 55.4, 50.6, 35.8, 30.4, 22.9, 14.2.

FT-IR (neat) 3060, 3026, 2999, 2964, 2930, 2858, 2833, 1611, 1583, 1511, 1494, 1452, 1377, 1302, 1287, 1247, 1177, 1120, 1038, 826, 783, 767, 726 cm<sup>-1</sup>.

MS (EI) *m/z* (M<sup>+</sup>) calcd for C<sub>18</sub>H<sub>22</sub>O: 254.2, found: 254.2.

[α]<sub>D</sub><sup>25</sup> = +5.8° (c = 1.00, CHCl<sub>3</sub>).

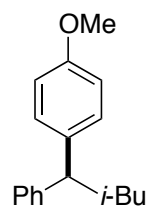

**(S)-1-Methoxy-4-(3-methyl-1-phenylbutyl)benzene (Table 2, Entry 5).** The title compound was prepared according to General Method A: 3-Methyl-1-phenylbutyl mesylate (0.70 mmol), 4-methoxyphenylzinc iodide (1.7 equiv), -45 °C. The product was purified by column



chromatography (hexanes → 25% CH<sub>2</sub>Cl<sub>2</sub>/hexanes). Colorless oil. First run: 140 mg (79%; 95% ee). Second run: 131 mg (74%; 95% ee).

The ee was determined by SFC on a CHIRALPAK IC column (2% MeOH in CO<sub>2</sub>, 1.5 mL/min) with t<sub>r</sub> = 5.90 min (major), 6.21 min (minor).

<sup>1</sup>H NMR (500 MHz, CDCl<sub>3</sub>) δ 7.32 – 7.11 (m, 7H), 6.87 – 6.77 (m, 2H), 3.97 (t, J = 8.0 Hz, 1H), 3.77 (s, 3H), 1.89 (dd, J = 8.0, 6.9 Hz, 2H), 1.50 – 1.39 (m, 1H), 0.91 (dd, J = 6.6, 0.9 Hz, 6H).

<sup>13</sup>C NMR (126 MHz, CDCl<sub>3</sub>) δ 158.0, 145.9, 137.6, 128.9, 128.5, 127.9, 126.0, 113.9, 55.4, 48.1, 45.4, 25.7, 22.8, 22.7.

FT-IR (neat) 3060, 3026, 2953, 2866, 2834, 1611, 1583, 1511, 1494, 1465, 1452, 1383, 1366, 1302, 1249, 1177, 1121, 1070, 1039, 829, 783, 768, 727 cm<sup>-1</sup>.

MS (EI) *m/z* (M<sup>+</sup>) calcd for C<sub>18</sub>H<sub>22</sub>O: 254.2, found: 254.2.

[α]<sub>D</sub><sup>25</sup> = +6.0° (c = 1.00, CHCl<sub>3</sub>).

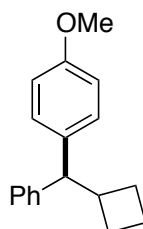

**(S)-1-(Cyclobutyl(phenyl)methyl)-4-methoxybenzene (Table 2, Entry 6).** The title compound was prepared according to General Method A: Cyclobutyl(phenyl)methyl mesylate (0.70 mmol), 4-methoxyphenylzinc iodide (1.7 equiv), -45 °C. The product was purified by column chromatography (hexanes → 25% CH<sub>2</sub>Cl<sub>2</sub>/hexanes). Colorless oil. First run: 88 mg (50%; 94% ee). Second run: 90 mg (51%; 94% ee).

The ee was determined by SFC on a CHIRALPAK AD-H column (2% MeOH in CO<sub>2</sub>, 2.5 mL/min) with t<sub>r</sub> = 5.79 min (major), 7.34 min (minor).

<sup>1</sup>H NMR (500 MHz, CDCl<sub>3</sub>) δ 7.29 – 7.06 (m, 7H), 6.85 – 6.76 (m, 2H), 3.81 (d, J = 11.0 Hz, 1H), 3.76 (s, 3H), 3.07 – 2.94 (m, 1H), 2.08 – 1.94 (m, 2H), 1.91 – 1.67 (m, 4H).

<sup>13</sup>C NMR (126 MHz, CDCl<sub>3</sub>) δ 157.9, 144.4, 136.2, 129.1, 128.4, 128.1, 126.1, 113.8, 57.6, 55.3, 40.4, 28.1, 28.0, 17.7.

FT-IR (neat) 3060, 3026, 2957, 2833, 1610, 1583, 1511, 1494, 1463, 1302, 1247, 1177, 1131, 1104, 1071, 1037, 804, 723 cm<sup>-1</sup>.

MS (EI) *m/z* (M<sup>+</sup>) calcd for C<sub>18</sub>H<sub>20</sub>O: 252.1, found: 252.1.

[α]<sub>D</sub><sup>25</sup> = +1.83° (c = 1.00, CHCl<sub>3</sub>).

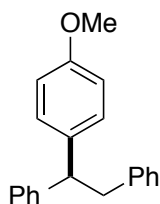

**(S)-1-(4-Methoxyphenyl)ethane-1,2-diyl dibenzene (Table 2, Entry 7).** The title compound was prepared according to General Method A: 1,2-Diphenylethyl mesylate (0.70 mmol), 4-methoxyphenylzinc iodide (1.7 equiv),  $-35\text{ }^{\circ}\text{C}$ . The product was purified by column chromatography (hexanes  $\rightarrow$  25%  $\text{CH}_2\text{Cl}_2$ /hexanes). White solid. First run: 158 mg (78%; 95% ee). Second run: 163 mg (81%; 95% ee).

The ee was determined by SFC on a CHIRALPAK IC column (3% MeOH in  $\text{CO}_2$ , 2.5 mL/min) with  $t_r = 6.70$  min (major), 7.13 min (minor).

$^1\text{H}$  NMR (500 MHz,  $\text{CDCl}_3$ )  $\delta$  7.30 – 7.06 (m, 10H), 7.03 – 6.97 (m, 2H), 6.82 – 6.74 (m, 2H), 4.19 (t,  $J = 7.8$  Hz, 1H), 3.76 (s, 3H), 3.33 (d,  $J = 7.8$  Hz, 2H).

$^{13}\text{C}$  NMR (126 MHz,  $\text{CDCl}_3$ )  $\delta$  158.0, 145.0, 140.5, 136.8, 129.2, 129.1, 128.5, 128.2, 128.1, 126.2, 126.0, 113.8, 55.3, 52.4, 42.5.

FT-IR (neat) 3084, 3059, 3026, 3000, 2931, 2835, 1610, 1583, 1510, 1495, 1452, 1302, 1249, 1177, 1110, 1071, 1032, 829  $\text{cm}^{-1}$ .

MS (EI)  $m/z$  ( $[\text{M} - \text{CH}_2\text{C}_6\text{H}_5]^+$ ) calcd for  $\text{C}_{14}\text{H}_{13}\text{O}$ : 197.1, found: 197.0.

$[\alpha]_D^{25} = -18.7^{\circ}$  ( $c = 1.00$ ,  $\text{CHCl}_3$ ).

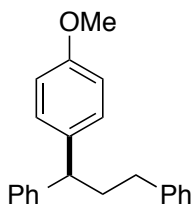

**(S)-1-(4-Methoxyphenyl)propane-1,3-diyl dibenzene (Table 2, Entry 8).** The title compound was prepared according to General Method A: 1,3-Diphenylpropyl mesylate (0.70 mmol), 4-methoxyphenylzinc iodide (1.7 equiv),  $-45\text{ }^{\circ}\text{C}$ . The product was purified by column chromatography (hexanes  $\rightarrow$  25%  $\text{CH}_2\text{Cl}_2$ /hexanes). Colorless oil. First run: 187 mg (89%; 88% ee). Second run: 192 mg (91%; 88% ee).

The ee was determined by SFC on a CHIRALPAK IC column (3% MeOH in  $\text{CO}_2$ , 2.5 mL/min) with  $t_r = 7.58$  min (major), 8.26 min (minor).

$^1\text{H}$  NMR (500 MHz,  $\text{CDCl}_3$ )  $\delta$  7.32 – 7.11 (m, 12H), 6.89 – 6.79 (m, 2H), 3.88 (t,  $J = 7.8$  Hz, 1H), 3.78 (s, 3H), 2.62 – 2.52 (m, 2H), 2.41 – 2.30 (m, 2H).

$^{13}\text{C}$  NMR (126 MHz,  $\text{CDCl}_3$ )  $\delta$  158.1, 145.4, 142.3, 137.1, 128.9, 128.593, 128.586, 128.5, 127.9, 126.2, 125.9, 114.0, 55.4, 50.0, 37.6, 34.3.

FT-IR (neat) 3083, 3060, 3025, 3000, 2932, 2860, 2834, 2060, 1947, 1881, 1805, 1753, 1608, 1583, 1515, 1513, 1506, 1495, 1463, 1454, 1441, 1334, 1302, 1247, 1177, 1155, 1111, 1076, 1036, 907, 866, 826, 807, 780, 761, 727  $\text{cm}^{-1}$ .

MS (EI)  $m/z$  ( $\text{M}^+$ ) calcd for  $\text{C}_{22}\text{H}_{22}\text{O}$ : 302.2, found: 302.1.

$[\alpha]_D^{25} = +0.51^{\circ}$  ( $c = 1.00$ ,  $\text{CHCl}_3$ ).

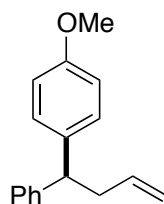

**(S)-1-Methoxy-4-(1-phenylbut-3-en-1-yl)benzene (Table 2, Entry 9).** The title compound was prepared according to General Method A: 1-Phenylbut-3-en-1-yl mesylate (0.70 mmol), 4-methoxyphenylzinc iodide (1.7 equiv),  $-45\text{ }^{\circ}\text{C}$ . The product was purified by column chromatography (hexanes  $\rightarrow$  25%  $\text{CH}_2\text{Cl}_2$ /hexanes). Colorless oil. First run: 95 mg (57%; 86% ee). Second run: 100 mg (60%; 85% ee).

The ee was determined by SFC on a CHIRALPAK IC column (1% MeOH in  $\text{CO}_2$ , 2.5 mL/min) with  $t_r = 5.11$  min (major), 5.65 min (minor).

$^1\text{H}$  NMR (500 MHz,  $\text{CDCl}_3$ )  $\delta$  7.33 – 7.10 (m, 7H), 6.88 – 6.77 (m, 2H), 5.77 – 5.66 (m, 1H), 5.06 – 5.00 (m, 1H), 4.97 – 4.93 (m, 1H), 3.97 (t,  $J = 7.9$  Hz, 1H), 3.77 (s, 3H), 2.79 (ddt,  $J = 8.0, 6.8, 1.3$  Hz, 2H).

$^{13}\text{C}$  NMR (126 MHz,  $\text{CDCl}_3$ )  $\delta$  157.9, 144.9, 136.9, 136.6, 128.8, 128.4, 127.8, 126.1, 116.2, 113.7, 55.2, 50.4, 40.1.

FT-IR (neat) 3060, 3026, 2932, 2833, 1947, 1881, 1608, 1583, 1511, 1494, 1454, 1302, 1247, 1177, 1111, 1076, 1035, 907, 826, 780, 748  $\text{cm}^{-1}$ .

MS (EI)  $m/z$  ( $[\text{M} - \text{CH}_2\text{CH}=\text{CH}_2]^+$ ) calcd for  $\text{C}_{14}\text{H}_{13}\text{O}$ : 197.1, found: 197.0.

$[\alpha]_{\text{D}}^{25} = +1.25^{\circ}$  ( $c = 1.00$ ,  $\text{CHCl}_3$ ).

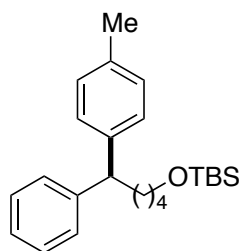

**(S)-*t*-Butyl dimethyl((5-phenyl-5-(*p*-tolyl)pentyl)oxy)silane (Table 2, Entry 10).** The title compound was prepared according to General Method A: 5-((*t*-Butyl dimethylsilyl)oxy)-1-phenylpentyl mesylate (0.70 mmol), *p*-tolylzinc iodide (1.7 equiv),  $-45\text{ }^{\circ}\text{C}$ . The product was purified by column chromatography (hexanes  $\rightarrow$  25%  $\text{CH}_2\text{Cl}_2$ /hexanes). Colorless oil. First run: 201 mg (78%; 94% ee). Second run: 196 mg (76%; 93% ee).

The ee was determined by SFC on a CHIRALCEL OB-H column (3% MeOH in  $\text{CO}_2$ , 2.5 mL/min) with  $t_r = 2.93$  min (major), 3.54 min (minor).

$^1\text{H}$  NMR (500 MHz,  $\text{CDCl}_3$ )  $\delta$  7.30 – 7.18 (m, 4H), 7.21 – 7.04 (m, 5H), 3.85 (t,  $J = 7.8$  Hz, 1H), 3.56 (t,  $J = 6.6$  Hz, 2H), 2.30 (s, 3H), 2.08 – 1.98 (m, 2H), 1.60 – 1.49 (m, 2H), 1.34 – 1.23 (m, 2H), 0.86 (s, 9H), 0.01 (s, 6H).

$^{13}\text{C}$  NMR (126 MHz,  $\text{CDCl}_3$ )  $\delta$  145.4, 142.2, 135.4, 129.1, 128.3, 127.8, 127.7, 125.9, 63.1, 50.9, 35.5, 32.8, 26.0, 24.3, 21.0, 18.3,  $-5.3$ .

FT-IR (neat) 3024, 2928, 2857, 1600, 1512, 1494, 1471, 1462, 1387, 1360, 1255, 1104, 1021, 1005, 835, 774, 720  $\text{cm}^{-1}$ .

MS (EI)  $m/z$  ( $[M - (\text{CH}_3)_3\text{C}]^+$ ) calcd for  $\text{C}_{20}\text{H}_{27}\text{OSi}$ : 311.2, found: 311.1.

$[\alpha]_{\text{D}}^{25} = +4.3^\circ$  ( $c = 1.00$ ,  $\text{CHCl}_3$ ).

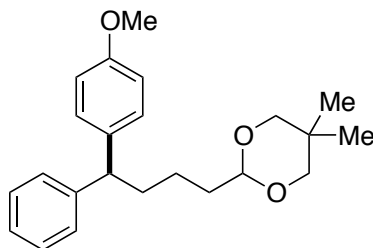

**(S)-2-(4-(4-Methoxyphenyl)-4-phenylbutyl)-5,5-dimethyl-1,3-dioxane (Table 2, Entry 11).**

The title compound was prepared according to General Method A: 4-(5,5-Dimethyl-1,3-dioxan-2-yl)-1-phenylbutyl mesylate (0.70 mmol), 4-methoxyphenylzinc iodide (1.7 equiv),  $-45^\circ\text{C}$ . The product was purified by column chromatography (hexanes  $\rightarrow$  10%  $\text{Et}_2\text{O}$ /hexanes). Colorless oil. First run: 204 mg (82%; 92% ee). Second run: 214 mg (86%; 92% ee).

The ee was determined by SFC on a CHIRALCEL OD-H column (5% MeOH in  $\text{CO}_2$ , 2.5 mL/min) with  $t_r = 7.50$  min (major), 10.40 min (minor).

$^1\text{H}$  NMR (500 MHz,  $\text{CDCl}_3$ )  $\delta$  7.31 – 7.09 (m, 7H), 6.91 – 6.78 (m, 2H), 4.35 (t,  $J = 5.1$  Hz, 1H), 3.84 (t,  $J = 7.8$  Hz, 1H), 3.77 (s, 3H), 3.58 – 3.54 (m, 2H), 3.39 – 3.35 (m, 2H), 2.08 – 1.96 (m, 2H), 1.70 – 1.61 (m, 2H), 1.44 – 1.31 (m, 2H), 1.16 (s, 3H), 0.70 (s, 3H).

$^{13}\text{C}$  NMR (126 MHz,  $\text{CDCl}_3$ )  $\delta$  157.8, 145.5, 137.2, 128.7, 128.4, 127.7, 125.9, 113.7, 102.1, 55.2, 50.5, 35.8, 34.8, 30.1, 23.0, 22.7, 21.8.

FT-IR (neat) 3026, 2951, 2835, 1610, 1583, 1511, 1494, 1463, 1393, 1362, 1302, 1247, 1176, 1131, 1096, 1039, 973, 927, 824, 784, 726  $\text{cm}^{-1}$ .

MS (EI)  $m/z$  ( $\text{M}^+$ ) calcd for  $\text{C}_{23}\text{H}_{30}\text{O}_3$ : 354.2, found: 354.1.

$[\alpha]_{\text{D}}^{25} = +0.16^\circ$  ( $c = 1.00$ ,  $\text{CHCl}_3$ ).

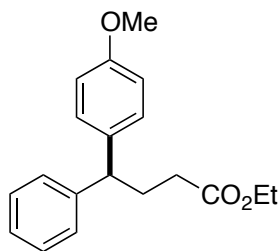

**(S)-Ethyl 4-(4-methoxyphenyl)-4-phenylbutanoate (Table 2, Entry 12).** The title compound was prepared according to General Method B: Ethyl 4-((methylsulfonyl)oxy)-4-phenylbutanoate (0.70 mmol), 4-methoxyphenylzinc iodide (1.7 equiv),  $-45^\circ\text{C}$ . The product was purified by column chromatography (hexanes  $\rightarrow$  10%  $\text{Et}_2\text{O}$ /hexanes). Colorless oil. First run: 176 mg (84%; 94% ee). Second run: 173 mg (83%; 94% ee).

The ee was determined by HPLC on a CHIRALCEL OD-H column (3% *i*-PrOH/hexanes, 1.0 mL/min) with  $t_r = 10.60$  min (minor), 11.53 min (major).

$^1\text{H}$  NMR (500 MHz,  $\text{CDCl}_3$ )  $\delta$  7.32 – 7.12 (m, 7H), 6.86 – 6.77 (m, 2H), 4.10 (q,  $J = 7.2$  Hz, 2H), 3.88 (t,  $J = 7.8$  Hz, 1H), 3.77 (s, 3H), 2.41 – 2.29 (m, 2H), 2.31 – 2.20 (m, 2H), 1.23 (t,  $J = 7.1$  Hz, 3H).

$^{13}\text{C}$  NMR (126 MHz,  $\text{CDCl}_3$ )  $\delta$  173.5, 158.0, 144.5, 136.3, 128.8, 128.5, 127.7, 126.2, 113.9, 60.3, 55.2, 49.7, 32.8, 30.8, 14.2.

FT-IR (neat) 2963, 2935, 2875, 2835, 1732, 1610, 1583, 1511, 1495, 1452, 1374, 1303, 1249, 1178, 1113, 1035, 827, 784, 765, 727  $\text{cm}^{-1}$ .

MS (EI)  $m/z$  ( $\text{M}^+$ ) calcd for  $\text{C}_{19}\text{H}_{22}\text{O}_3$ : 298.2, found: 298.1.

$[\alpha]_{\text{D}}^{25} = +3.2^\circ$  ( $c = 1.00$ ,  $\text{CHCl}_3$ ).

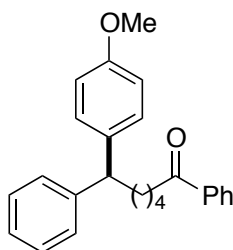

**(S)-6-(4-Methoxyphenyl)-1,6-diphenylhexan-1-one (Table 2, Entry 13).** The title compound was prepared according to General Method B: 6-Oxo-1,6-diphenylhexyl mesylate (0.70 mmol), 4-methoxyphenylzinc iodide (1.7 equiv),  $-45^\circ\text{C}$ . The product was purified by column chromatography (hexanes  $\rightarrow$  25%  $\text{CH}_2\text{Cl}_2$ /hexanes). White solid. First run: 221 mg (88%; 94% ee). Second run: 220 mg (88%; 95% ee).

The ee was determined by SFC on a CHIRALPAK AD-H column (7% MeOH in  $\text{CO}_2$ , 2.5 mL/min) with  $t_r = 8.37$  min (major), 13.34 min (minor).

$^1\text{H}$  NMR (500 MHz,  $\text{CDCl}_3$ )  $\delta$  7.96 – 7.89 (m, 2H), 7.59 – 7.50 (m, 1H), 7.49 – 7.40 (m, 2H), 7.32 – 7.11 (m, 7H), 6.85 – 6.78 (m, 2H), 3.86 (t,  $J = 7.8$  Hz, 1H), 3.77 (s, 3H), 2.93 (dd,  $J = 7.8, 7.0$  Hz, 2H), 2.13 – 2.01 (m, 2H), 1.84 – 1.72 (m, 2H), 1.42 – 1.29 (m, 2H).

$^{13}\text{C}$  NMR (126 MHz,  $\text{CDCl}_3$ )  $\delta$  200.3, 157.8, 145.5, 137.2, 137.0, 132.9, 128.7, 128.5, 128.4, 128.0, 127.7, 126.0, 113.8, 55.2, 50.3, 38.5, 35.7, 27.8, 24.2.

FT-IR (neat) 3058, 3025, 3000, 2933, 2860, 2834, 1683, 1609, 1597, 1581, 1511, 1494, 1463, 1448, 1365, 1302, 1248, 1177, 1034, 827, 753, 727  $\text{cm}^{-1}$ .

MS (EI)  $m/z$  ( $\text{M}^+$ ) calcd for  $\text{C}_{25}\text{H}_{26}\text{O}_2$ : 358.2, found: 358.1.

$[\alpha]_{\text{D}}^{25} = +2.0^\circ$  ( $c = 1.00$ ,  $\text{CHCl}_3$ ).

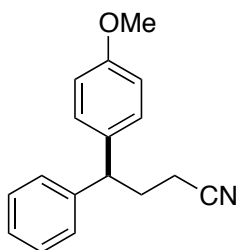

**(S)-4-(4-Methoxyphenyl)-4-phenylbutanenitrile (Table 2, Entry 14).** The title compound was prepared according to General Method B: 3-Cyano-1-phenylpropyl mesylate (0.70 mmol),

4-methoxyphenylzinc iodide (1.7 equiv),  $-45\text{ }^{\circ}\text{C}$ . The product was purified by column chromatography (hexanes  $\rightarrow$  20% Et<sub>2</sub>O/hexanes). Colorless oil. First run: 130 mg (74%; 94% ee). Second run: 131 mg (75%; 94% ee).

The ee was determined by SFC on a CHIRALPAK AD-H column (10% MeOH in CO<sub>2</sub>, 2.5 mL/min) with  $t_r = 4.49$  min (major), 5.36 min (minor).

<sup>1</sup>H NMR (500 MHz, CDCl<sub>3</sub>)  $\delta$  7.35 – 7.10 (m, 7H), 6.90 – 6.80 (m, 2H), 4.01 (t,  $J = 8.0$  Hz, 1H), 3.78 (s, 3H), 2.42 – 2.31 (m, 2H), 2.32 – 2.21 (m, 2H).

<sup>13</sup>C NMR (126 MHz, CDCl<sub>3</sub>)  $\delta$  158.4, 143.1, 134.8, 128.8, 128.6, 127.6, 126.8, 119.4, 114.2, 55.3, 49.0, 31.2, 15.8.

FT-IR (neat) 3060, 3027, 3002, 2934, 2835, 2244, 1610, 1583, 1506, 1453, 1422, 1303, 1248, 1178, 1113, 1034, 825, 785, 764, 728 cm<sup>-1</sup>.

MS (EI)  $m/z$  ( $M^+$ ) calcd for C<sub>17</sub>H<sub>17</sub>NO: 251.1, found: 251.1.

$[\alpha]_D^{25} = -6.5^{\circ}$  ( $c = 1.00$ , CHCl<sub>3</sub>).

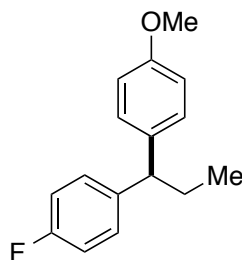

**(R)-1-Fluoro-4-(1-(4-methoxyphenyl)propyl)benzene (Table 2, Entry 15).** The title compound was prepared according to General Method A: 1-(4-Fluorophenyl)propyl mesylate (0.70 mmol), 4-methoxyphenylzinc iodide (1.7 equiv),  $-45\text{ }^{\circ}\text{C}$ . The product was purified by column chromatography (hexanes  $\rightarrow$  25% CH<sub>2</sub>Cl<sub>2</sub>/hexanes). Colorless oil. First run: 145 mg (85%; 92% ee). Second run: 150 mg (88%; 93% ee).

The ee was determined by HPLC on a CHIRALCEL OJ-H column (2% *i*-PrOH/hexanes, 1.0 mL/min) with  $t_r = 13.98$  min (minor), 15.48 min (major).

<sup>1</sup>H NMR (500 MHz, CDCl<sub>3</sub>)  $\delta$  7.19 – 7.09 (m, 4H), 6.98 – 6.92 (m, 2H), 6.85 – 6.80 (m, 2H), 3.77 (s, 3H), 3.72 (t,  $J = 7.8$  Hz, 1H), 2.07 – 1.94 (m, 2H), 0.88 (t,  $J = 7.3$  Hz, 3H).

<sup>13</sup>C NMR (126 MHz, CDCl<sub>3</sub>)  $\delta$  161.3 (d,  $J = 243.7$  Hz), 158.0, 141.4 (d,  $J = 3.4$  Hz), 137.3, 129.3 (d,  $J = 8.0$  Hz), 128.8, 115.2 (d,  $J = 21.1$  Hz), 113.9, 55.4, 51.7, 29.0, 12.9.

FT-IR (neat) 2961, 2932, 2873, 2834, 1610, 1583, 1506, 1463, 1378, 1302, 1249, 1178, 1158, 1119, 1038, 1015, 825, 781, 737 cm<sup>-1</sup>.

MS (EI)  $m/z$  ( $M^+$ ) calcd for C<sub>16</sub>H<sub>17</sub>FO: 244.1, found: 244.1.

$[\alpha]_D^{25} = +4.8^{\circ}$  ( $c = 1.00$ , CHCl<sub>3</sub>).

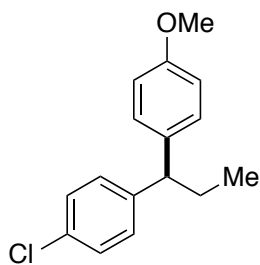

**(R)-1-Chloro-4-(1-(4-methoxyphenyl)propyl)benzene (Table 2, Entry 16).** The title compound was prepared according to General Method A: 1-(4-Chlorophenyl)propyl mesylate (0.70 mmol), 4-methoxyphenylzinc iodide (1.7 equiv),  $-45\text{ }^{\circ}\text{C}$ . The product was purified by column chromatography (hexanes  $\rightarrow$  25%  $\text{CH}_2\text{Cl}_2$ /hexanes). Colorless oil. First run: 162 mg (89%; 90% ee). Second run: 156 mg (86%; 90% ee).

The ee was determined by HPLC on a CHIRALCEL OJ-H column (2% *i*-PrOH/hexanes, 1.0 mL/min) with  $t_r = 10.87$  min (minor), 11.76 min (major).

$^1\text{H}$  NMR (500 MHz,  $\text{CDCl}_3$ )  $\delta$  7.28 – 7.20 (m, 2H), 7.17 – 7.08 (m, 4H), 6.86 – 6.79 (m, 2H), 3.77 (s, 3H), 3.72 (t,  $J = 7.9$  Hz, 1H), 2.06 – 1.96 (m, 2H), 0.88 (t,  $J = 7.3$  Hz, 3H).

$^{13}\text{C}$  NMR (126 MHz,  $\text{CDCl}_3$ )  $\delta$  157.9, 144.1, 136.7, 131.6, 129.1, 128.7, 128.4, 113.8, 55.2, 51.7, 28.6, 12.7.

FT-IR (neat) 2960, 2931, 2873, 2834, 1610, 1583, 1506, 1489, 1407, 1378, 1302, 1249, 1176, 1120, 1092, 1038, 1014, 820, 757  $\text{cm}^{-1}$ .

MS (EI)  $m/z$  ( $\text{M}^+$ ) calcd for  $\text{C}_{16}\text{H}_{17}\text{ClO}$ : 260.1, found: 260.1.

$[\alpha]_{\text{D}}^{25} = +2.8^{\circ}$  ( $c = 1.00$ ,  $\text{CHCl}_3$ ).

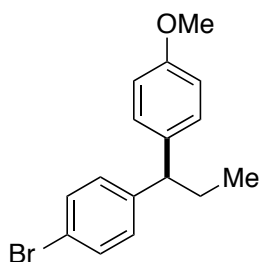

**(R)-1-Bromo-4-(1-(4-methoxyphenyl)propyl)benzene (Table 2, Entry 17).** The title compound was prepared according to General Method A: 1-(4-Bromophenyl)propyl mesylate (0.70 mmol), 4-methoxyphenylzinc iodide (1.7 equiv),  $-45\text{ }^{\circ}\text{C}$ . The product was purified by column chromatography (hexanes  $\rightarrow$  25%  $\text{CH}_2\text{Cl}_2$ /hexanes). Colorless oil. First run: 167 mg (78%; 91% ee). Second run: 170 mg (80%; 91% ee).

The ee was determined by SFC on a CHIRALPAK AD-H column (3% MeOH in  $\text{CO}_2$ , 2.5 mL/min) with  $t_r = 7.56$  min (minor), 8.87 min (major).

$^1\text{H}$  NMR (500 MHz,  $\text{CDCl}_3$ )  $\delta$  7.42 – 7.33 (m, 2H), 7.16 – 7.03 (m, 4H), 6.86 – 6.77 (m, 2H), 3.77 (s, 3H), 3.70 (t,  $J = 7.8$  Hz, 1H), 2.07 – 1.94 (m, 2H), 0.88 (t,  $J = 7.3$  Hz, 3H).

$^{13}\text{C}$  NMR (126 MHz,  $\text{CDCl}_3$ )  $\delta$  157.9, 144.6, 136.6, 131.4, 129.6, 128.7, 119.6, 113.8, 55.2, 51.8, 28.6, 12.7.

FT-IR (neat) 2960, 2930, 2872, 2833, 1611, 1583, 1511, 1488, 1463, 1404, 1302, 1249, 1177, 1121, 1075, 1038, 1009, 818, 752  $\text{cm}^{-1}$ .

MS (EI)  $m/z$  ( $\text{M}^+$ ) calcd for  $\text{C}_{16}\text{H}_{17}\text{BrO}$ : 304.0, found: 303.9.

$[\alpha]_D^{25} = +0.02^\circ$  ( $c = 1.00$ ,  $\text{CHCl}_3$ ).

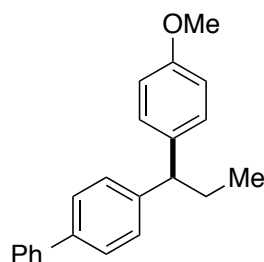

**(S)-4-(1-(4-Methoxyphenyl)propyl)-1,1'-biphenyl (Table 2, Entry 18).** The title compound was prepared according to General Method A: 1-([1,1'-Biphenyl]-4-yl)propyl mesylate (0.70 mmol), 4-methoxyphenylzinc iodide (1.7 equiv),  $-45^\circ\text{C}$ . The product was purified by column chromatography (hexanes  $\rightarrow$  25%  $\text{CH}_2\text{Cl}_2$ /hexanes). Light-tan solid. First run: 165 mg (78%; 92% ee). Second run: 165 mg (78%; 92% ee).

The ee was determined by SFC on a CHIRALPAK IC column (3% MeOH in  $\text{CO}_2$ , 2.5 mL/min) with  $t_r = 13.03$  min (minor), 13.99 min (major).

$^1\text{H}$  NMR (500 MHz,  $\text{CDCl}_3$ )  $\delta$  7.60 – 7.37 (m, 6H), 7.37 – 7.24 (m, 3H), 7.24 – 7.15 (m, 2H), 6.88 – 6.79 (m, 2H), 3.79 (t,  $J = 7.9$  Hz, 1H), 3.78 (s, 3H), 2.14 – 2.01 (m, 2H), 0.92 (t,  $J = 7.3$  Hz, 3H).

$^{13}\text{C}$  NMR (126 MHz,  $\text{CDCl}_3$ )  $\delta$  157.9, 144.7, 141.0, 138.8, 137.2, 128.8, 128.6, 128.2, 127.1, 127.0, 113.8, 55.2, 52.1, 28.8, 12.8.

FT-IR (neat) 3027, 2959, 2930, 2872, 2833, 1611, 1583, 1511, 1486, 1463, 1407, 1377, 1302, 1248, 1177, 1123, 1075, 1038, 1007, 825, 766, 745, 734  $\text{cm}^{-1}$ .

MS (EI)  $m/z$  ( $\text{M}^+$ ) calcd for  $\text{C}_{22}\text{H}_{22}\text{O}$ : 302.2, found: 302.1.

$[\alpha]_D^{25} = -5.9^\circ$  ( $c = 1.00$ ,  $\text{CHCl}_3$ ).

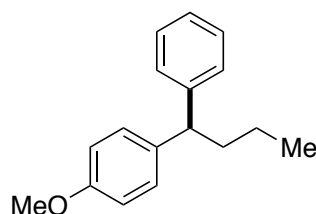

**(R)-1-Methoxy-4-(1-phenylbutyl)benzene (Table 2, Entry 19).** The title compound was prepared according to General Method B: 1-(4-Methoxyphenyl)butyl mesylate (0.70 mmol), phenylzinc iodide (1.7 equiv),  $-45^\circ\text{C}$ . The product was purified by column chromatography (hexanes  $\rightarrow$  25%  $\text{CH}_2\text{Cl}_2$ /hexanes). Colorless oil. First run: 157 mg (93%; 94% ee). Second run: 160 mg (95%; 95% ee).

The ee was determined by SFC on a CHIRALCEL AD-H column (3% MeOH in  $\text{CO}_2$ , 2.5 mL/min) with  $t_r = 2.91$  min (minor), 3.23 min (major).

$^1\text{H}$  NMR (500 MHz,  $\text{CDCl}_3$ )  $\delta$  7.32 – 7.10 (m, 7H), 6.86 – 6.77 (m, 2H), 3.86 (t,  $J = 7.8$  Hz, 1H), 3.77 (s, 3H), 2.05 – 1.93 (m, 2H), 1.33 – 1.20 (m, 2H), 0.92 (t,  $J = 7.4$  Hz, 3H).

$^{13}\text{C}$  NMR (126 MHz,  $\text{CDCl}_3$ )  $\delta$  157.8, 145.7, 137.5, 128.7, 128.3, 127.8, 125.9, 113.7, 55.2, 50.2, 38.1, 21.2, 14.1.



FT-IR (neat) 3060, 3026, 2999, 2955, 2930, 2870, 2833, 1610, 1583, 1511, 1494, 1463, 1452, 1378, 1302, 1249, 1177, 1119, 1067, 1037, 851, 824, 803, 784, 750, 726  $\text{cm}^{-1}$ .

MS (EI)  $m/z$  ( $M^+$ ) calcd for  $C_{17}H_{20}O$ : 240.1, found: 240.1.

$[\alpha]_D^{25} = -7.0^\circ$  ( $c = 1.00$ ,  $\text{CHCl}_3$ ).

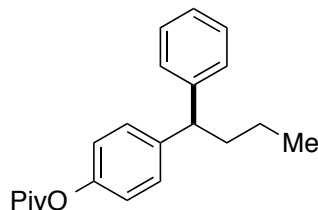

**(R)-4-(1-Phenylbutyl)phenyl pivalate (Table 2, Entry 20).** The title compound was prepared according to General Method B: 4-(1-(Mesyloxy)butyl)phenyl pivalate (0.70 mmol), phenylzinc iodide (1.7 equiv),  $-35^\circ\text{C}$ . The product was purified by column chromatography (hexanes  $\rightarrow$  25%  $\text{CH}_2\text{Cl}_2$ /hexanes). Colorless oil. First run: 182 mg (84%; 84% ee). Second run: 180 mg (84%; 84% ee).

The ee was determined by SFC on a CHIRALCEL OB-H column (5% MeOH in  $\text{CO}_2$ , 2.5 mL/min) with  $t_r = 2.56$  min (minor), 3.75 min (major).

$^1\text{H}$  NMR (500 MHz,  $\text{CDCl}_3$ )  $\delta$  7.31 – 7.11 (m, 7H), 7.01 – 6.93 (m, 2H), 3.91 (t,  $J = 7.8$  Hz, 1H), 2.06 – 1.95 (m, 2H), 1.33 (s, 9H), 1.34 – 1.22 (m, 2H), 0.92 (t,  $J = 7.4$  Hz, 3H).

$^{13}\text{C}$  NMR (126 MHz,  $\text{CDCl}_3$ )  $\delta$  177.1, 149.2, 145.1, 142.6, 128.7, 128.4, 127.8, 126.0, 121.2, 50.4, 39.0, 37.9, 27.1, 21.1, 14.0.

FT-IR (neat) 3060, 3027, 2958, 2932, 2871, 1750, 1604, 1506, 1479, 1453, 1396, 1368, 1277, 1203, 1167, 1117, 1030, 1018, 895, 794, 753, 730  $\text{cm}^{-1}$ .

MS (EI)  $m/z$  ( $M^+$ ) calcd for  $C_{21}H_{26}O_2$ : 310.2, found: 310.2.

$[\alpha]_D^{25} = -3.9^\circ$  ( $c = 1.00$ ,  $\text{CHCl}_3$ ).

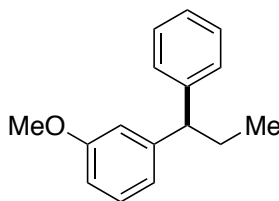

**(R)-1-Methoxy-3-(1-phenylpropyl)benzene (Table 2, Entry 21).** The title compound was prepared according to General Method B: 1-(3-Methoxyphenyl)propyl mesylate (0.70 mmol), phenylzinc iodide (1.7 equiv),  $-45^\circ\text{C}$ . The product was purified by column chromatography (hexanes  $\rightarrow$  25%  $\text{CH}_2\text{Cl}_2$ /hexanes). Colorless oil. First run: 157 mg (93%; 94% ee). Second run: 160 mg (95%; 94% ee).

The ee was determined by SFC on a CHIRALPAK IC column (1% MeOH in  $\text{CO}_2$ , 2.5 mL/min) with  $t_r = 4.23$  min (major), 4.67 min (minor).

$^1\text{H}$  NMR (500 MHz,  $\text{CDCl}_3$ )  $\delta$  7.33 – 7.12 (m, 6H), 6.87 – 6.77 (m, 2H), 6.71 (ddd,  $J = 8.2, 2.6, 0.9$  Hz, 1H), 3.79 – 3.73 (m, 4H), 2.13 – 2.00 (m, 2H), 0.90 (t,  $J = 7.3$  Hz, 3H).

$^{13}\text{C}$  NMR (126 MHz,  $\text{CDCl}_3$ )  $\delta$  159.6, 146.8, 145.0, 129.2, 128.3, 127.8, 126.0, 120.4, 114.1, 110.8, 55.1, 53.3, 28.5, 12.8.

FT-IR (neat) 3060, 3026, 2960, 2931, 2873, 2833, 1597, 1583, 1488, 1451, 1436, 1378, 1313, 1288, 1260, 1151, 1049, 874, 775, 758  $\text{cm}^{-1}$ .

MS (EI)  $m/z$  ( $\text{M}^+$ ) calcd for  $\text{C}_{16}\text{H}_{18}\text{O}$ : 226.1, found: 226.1.

$[\alpha]_{\text{D}}^{25} = +0.54^\circ$  ( $c = 1.00$ ,  $\text{CHCl}_3$ ).

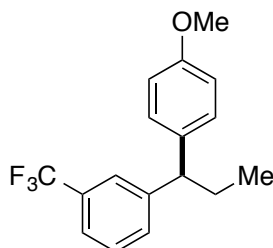

**(R)-1-(1-(4-Methoxyphenyl)propyl)-3-(trifluoromethyl)benzene (Table 2, Entry 22).** The title compound was prepared according to General Method A: 1-(3-(Trifluoromethyl)phenyl)propyl mesylate (0.70 mmol), 4-methoxyphenylzinc iodide (1.7 equiv),  $-35^\circ\text{C}$ . The product was purified by column chromatography (hexanes  $\rightarrow$  25%  $\text{CH}_2\text{Cl}_2$ /hexanes). Colorless oil. First run: 125 mg (61%; 89% ee). Second run: 131 mg (64%; 89% ee).

The ee was determined by SFC on a CHIRALCEL OJ-H column (1% MeOH in  $\text{CO}_2$ , 2.5 mL/min) with  $t_r = 3.41$  min (major), 3.84 min (minor).

$^1\text{H}$  NMR (500 MHz,  $\text{CDCl}_3$ )  $\delta$  7.51 – 7.33 (m, 4H), 7.20 – 7.09 (m, 2H), 6.90 – 6.80 (m, 2H), 3.81 (t,  $J = 7.7$  Hz, 1H), 3.79 (s, 3H), 2.13 – 2.00 (m, 2H), 0.90 (t,  $J = 7.3$  Hz, 3H).

$^{13}\text{C}$  NMR (126 MHz,  $\text{CDCl}_3$ )  $\delta$  158.1, 146.5, 136.2, 131.27 – 131.16 (m), 130.6 (q,  $J = 31.8$  Hz), 128.80 – 128.71 (m), 124.4 (q,  $J = 3.8$  Hz), 124.3 (q,  $J = 272.1$  Hz), 122.9 (q,  $J = 3.8$  Hz), 113.9, 55.2, 52.2, 28.6, 12.7.

FT-IR (neat) 2963, 2933, 2875, 2836, 1611, 1584, 1512, 1486, 1443, 1377, 1251, 1177, 1163, 1124, 1074, 1038, 900, 828, 802, 765, 735  $\text{cm}^{-1}$ .

MS (EI)  $m/z$  ( $\text{M}^+$ ) calcd for  $\text{C}_{17}\text{H}_{17}\text{F}_3\text{O}$ : 294.1, found: 294.1.

$[\alpha]_{\text{D}}^{25} = +6.1^\circ$  ( $c = 1.00$ ,  $\text{CHCl}_3$ ).

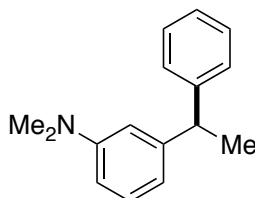

**(R)-N,N-Dimethyl-3-(1-phenylethyl)aniline (Table 2, Entry 23).** The title compound was prepared according to General Method B: 1-(3-(Dimethylamino)phenyl)ethyl mesylate (0.70 mmol), phenylzinc iodide (1.7 equiv),  $-45^\circ\text{C}$ . The product was purified by column chromatography (hexanes  $\rightarrow$  25%  $\text{CH}_2\text{Cl}_2$ /hexanes). Light-tan oil. First run: 135 mg (86%; 92% ee). Second run: 140 mg (89%; 92% ee).

The ee was determined by HPLC on a CHIRALCEL OD-H column (2% *i*-PrOH/hexanes, 1.0 mL/min) with  $t_r$  = 5.94 min (major), 6.95 min (minor).

$^1\text{H}$  NMR (500 MHz,  $\text{CDCl}_3$ )  $\delta$  7.33 – 7.21 (m, 4H), 7.23 – 7.11 (m, 2H), 6.64 – 6.55 (m, 3H), 4.11 (q,  $J$  = 7.2 Hz, 1H), 2.92 (s, 6H), 1.64 (d,  $J$  = 7.2 Hz, 3H).

$^{13}\text{C}$  NMR (126 MHz,  $\text{CDCl}_3$ )  $\delta$  150.7, 147.2, 146.6, 129.0, 128.2, 127.6, 125.8, 116.1, 112.3, 110.5, 45.2, 40.7, 21.9.

FT-IR (neat) 3060, 3025, 2965, 2929, 2872, 2801, 1682, 1597, 1578, 1495, 1450, 1436, 1351, 1231, 1177, 1154, 1061, 1028, 995, 958, 849, 766  $\text{cm}^{-1}$ .

MS (EI)  $m/z$  ( $\text{M}^+$ ) calcd for  $\text{C}_{16}\text{H}_{19}\text{N}$ : 225.2, found: 225.1.

$[\alpha]_{\text{D}}^{25} = +10.7^\circ$  ( $c$  = 1.00,  $\text{CHCl}_3$ ).

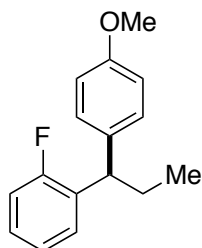

**(R)-1-Fluoro-2-(1-(4-methoxyphenyl)propyl)benzene (Table 2, Entry 24).** The title compound was prepared according to General Method A: 1-(2-Fluorophenyl)propyl mesylate (0.70 mmol), 4-methoxyphenylzinc iodide (1.7 equiv),  $-45^\circ\text{C}$ . The product was purified by column chromatography (hexanes  $\rightarrow$  25%  $\text{CH}_2\text{Cl}_2$ /hexanes). Colorless oil. First run: 114 mg (67%; 80% ee). Second run: 111 mg (65%; 81% ee).

The ee was determined by HPLC on a CHIRALCEL OJ-H column (1% *i*-PrOH/hexanes, 0.5 mL/min) with  $t_r$  = 31.87 min (minor), 35.53 min (major).

$^1\text{H}$  NMR (500 MHz,  $\text{CDCl}_3$ )  $\delta$  7.28 – 7.03 (m, 5H), 6.98 (ddd,  $J$  = 10.4, 8.1, 1.3 Hz, 1H), 6.86 – 6.79 (m, 2H), 4.11 (t,  $J$  = 7.8 Hz, 1H), 3.77 (s, 3H), 2.10 – 1.98 (m, 2H), 0.91 (t,  $J$  = 7.3 Hz, 3H).

$^{13}\text{C}$  NMR (126 MHz,  $\text{CDCl}_3$ )  $\delta$  160.7 (d,  $J$  = 244.6 Hz), 157.9, 136.1, 132.4 (d,  $J$  = 14.8 Hz), 128.8, 128.4 (d,  $J$  = 4.8 Hz), 127.4 (d,  $J$  = 8.4 Hz), 124.0 (d,  $J$  = 3.4 Hz), 115.3 (d,  $J$  = 22.9 Hz), 113.7, 55.2, 44.5 (d,  $J$  = 2.3 Hz), 27.8, 12.6.

FT-IR (neat) 2962, 2932, 2873, 2834, 1610, 1583, 1511, 1488, 1455, 1378, 1302, 1250, 1178, 1121, 1072, 1036, 825, 777, 756  $\text{cm}^{-1}$ .

MS (EI)  $m/z$  ( $\text{M}^+$ ) calcd for  $\text{C}_{16}\text{H}_{17}\text{FO}$ : 244.1, found: 244.1.

$[\alpha]_{\text{D}}^{25} = +6.0^\circ$  ( $c$  = 1.00,  $\text{CHCl}_3$ ).

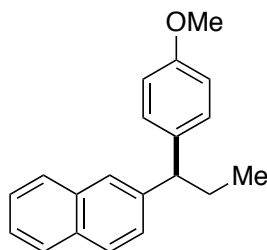

**(R)-2-(1-(4-Methoxyphenyl)propyl)naphthalene (Table 2, Entry 25).** The title compound was prepared according to General Method A: 1-(Naphthalen-2-yl)propyl mesylate (0.70 mmol), 4-methoxyphenylzinc iodide (1.7 equiv),  $-45\text{ }^{\circ}\text{C}$ . The product was purified by column chromatography (hexanes  $\rightarrow$  25%  $\text{CH}_2\text{Cl}_2$ /hexanes). Colorless oil. First run: 155 mg (80%; 92% ee). Second run: 149 mg (77%; 90% ee).

The ee was determined by SFC on a CHIRALPAK IC column (3% MeOH in  $\text{CO}_2$ , 2.5 mL/min) with  $t_r = 8.11$  min (major), 9.19 min (minor).

$^1\text{H}$  NMR (500 MHz,  $\text{CDCl}_3$ )  $\delta$  7.82 – 7.66 (m, 4H), 7.49 – 7.37 (m, 2H), 7.32 (dd,  $J = 8.5, 1.8$  Hz, 1H), 7.24 – 7.14 (m, 2H), 6.86 – 6.77 (m, 2H), 3.91 (t,  $J = 7.7$  Hz, 1H), 3.77 (s, 3H), 2.23 – 2.06 (m, 2H), 0.93 (t,  $J = 7.3$  Hz, 3H).

$^{13}\text{C}$  NMR (126 MHz,  $\text{CDCl}_3$ )  $\delta$  157.8, 142.9, 137.2, 133.5, 132.1, 128.9, 127.9, 127.7, 127.5, 126.8, 125.8, 125.7, 125.2, 113.7, 55.2, 52.4, 28.5, 12.8.

FT-IR (neat) 2959, 2930, 2872, 2833, 1609, 1583, 1510, 1462, 1302, 1249, 1178, 1118, 1037, 816,  $745\text{ cm}^{-1}$ .

MS (EI)  $m/z$  ( $\text{M}^+$ ) calcd for  $\text{C}_{20}\text{H}_{20}\text{O}$ : 276.2, found: 276.1.

$[\alpha]_{\text{D}}^{25} = -10.7^{\circ}$  ( $c = 1.00$ ,  $\text{CHCl}_3$ ).

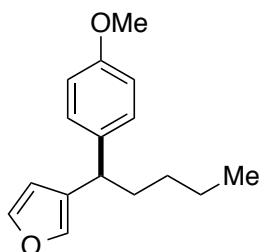

**(R)-3-(1-(4-Methoxyphenyl)pentyl)furan (Table 2, Entry 26).** The title compound was prepared according to General Method B: 1-(Furan-3-yl)pentyl mesylate (0.70 mmol), 4-methoxyphenylzinc iodide (1.7 equiv),  $-45\text{ }^{\circ}\text{C}$ . The product was purified by column chromatography (hexanes  $\rightarrow$  25%  $\text{CH}_2\text{Cl}_2$ /hexanes). Colorless oil. First run: 152 mg (89%; 93% ee). Second run: 149 mg (87%; 92% ee).

The ee was determined by SFC on a CHIRALCEL AS-H column (1% MeOH in  $\text{CO}_2$ , 2.5 mL/min) with  $t_r = 2.70$  min (major), 3.05 min (minor).

$^1\text{H}$  NMR (500 MHz,  $\text{CDCl}_3$ )  $\delta$  7.33 (t,  $J = 1.7$  Hz, 1H), 7.19 (dt,  $J = 1.8, 1.0$  Hz, 1H), 7.18 – 7.07 (m, 2H), 6.87 – 6.78 (m, 2H), 6.21 (dd,  $J = 1.9, 0.9$  Hz, 1H), 3.79 (s, 3H), 3.68 (t,  $J = 7.7$  Hz, 1H), 1.99 – 1.77 (m, 2H), 1.42 – 1.13 (m, 4H), 0.86 (t,  $J = 7.2$  Hz, 3H).

$^{13}\text{C}$  NMR (126 MHz,  $\text{CDCl}_3$ )  $\delta$  157.9, 142.8, 138.6, 136.9, 129.8, 128.6, 113.7, 110.4, 55.2, 41.5, 35.8, 30.0, 22.6, 14.0.

FT-IR (neat) 2997, 2955, 2930, 2858, 2834, 1611, 1584, 1507, 1464, 1441, 1378, 1302, 1247, 1176, 1159, 1114, 1065, 1037, 873, 835, 788, 764, 727  $\text{cm}^{-1}$ .

MS (EI)  $m/z$  ( $M^+$ ) calcd for  $C_{16}H_{20}O_2$ : 244.1, found: 244.1.

$[\alpha]_D^{25} = -32.6^\circ$  ( $c = 1.00$ ,  $\text{CHCl}_3$ ).

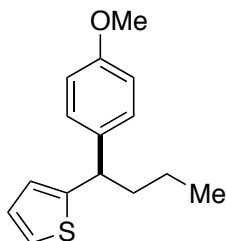

**(R)-2-(1-(4-Methoxyphenyl)butyl)thiophene (Table 2, Entry 27).** The title compound was prepared according to General Method B: 1-(Thiophen-2-yl)butyl mesylate (0.70 mmol), 4-methoxyphenylzinc iodide (1.7 equiv),  $-45^\circ\text{C}$ . The product was purified by column chromatography (hexanes  $\rightarrow$  25%  $\text{CH}_2\text{Cl}_2$ /hexanes). Colorless oil. First run: 94 mg (54%; 83% ee). Second run: 92 mg (53%; 82% ee).

The ee was determined by SFC on a CHIRALPAK IC column (2% MeOH in  $\text{CO}_2$ , 2.5 mL/min) with  $t_r = 6.11$  min (major), 6.63 min (minor).

$^1\text{H}$  NMR (500 MHz,  $\text{CDCl}_3$ )  $\delta$  7.22 – 7.09 (m, 3H), 6.95 – 6.77 (m, 4H), 4.09 (t,  $J = 7.6$  Hz, 1H), 3.79 (s, 3H), 2.12 – 1.92 (m, 2H), 1.39 – 1.22 (m, 2H), 0.92 (t,  $J = 7.4$  Hz, 3H).

$^{13}\text{C}$  NMR (126 MHz,  $\text{CDCl}_3$ )  $\delta$  158.1, 150.5, 136.9, 128.6, 126.4, 123.4, 123.2, 113.8, 55.2, 45.7, 39.7, 21.0, 13.9.

FT-IR (neat) 3067, 2997, 2955, 2930, 2870, 2833, 1610, 1584, 1508, 1463, 1440, 1378, 1302, 1247, 1177, 1116, 1036, 827, 778, 758  $\text{cm}^{-1}$ .

MS (EI)  $m/z$  ( $M^+$ ) calcd for  $C_{15}H_{18}OS$ : 246.1, found: 246.0.

$[\alpha]_D^{25} = -9.1^\circ$  ( $c = 1.00$ ,  $\text{CHCl}_3$ ).

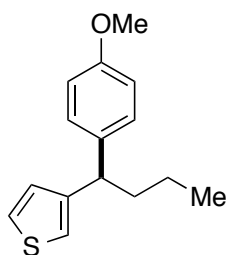

**(R)-3-(1-(4-Methoxyphenyl)butyl)thiophene (Table 2, Entry 28).** The title compound was prepared according to General Method B: 1-(Thiophen-3-yl)butyl mesylate (0.70 mmol), 4-methoxyphenylzinc iodide (1.7 equiv),  $-45^\circ\text{C}$ . The product was purified by column chromatography (hexanes  $\rightarrow$  25%  $\text{CH}_2\text{Cl}_2$ /hexanes). Colorless oil. First run: 160 mg (93%; 94% ee). Second run: 161 mg (93%; 94% ee).

The ee was determined by SFC on a CHIRALPAK AD-H column (3% MeOH in  $\text{CO}_2$ , 2.5 mL/min) with  $t_r = 3.76$  min (minor), 4.29 min (major).

$^1\text{H}$  NMR (500 MHz,  $\text{CDCl}_3$ )  $\delta$  7.21 (dd,  $J = 5.0, 2.9$  Hz, 1H), 7.17 – 7.08 (m, 2H), 6.96 (dt,  $J = 2.9, 1.1$  Hz, 1H), 6.89 (dd,  $J = 5.0, 1.3$  Hz, 1H), 6.85 – 6.80 (m, 2H), 3.92 (t,  $J = 7.9$  Hz, 1H), 3.78 (s, 3H), 2.08 – 1.86 (m, 2H), 1.34 – 1.20 (m, 2H), 0.91 (t,  $J = 7.3$  Hz, 3H).

$^{13}\text{C}$  NMR (126 MHz,  $\text{CDCl}_3$ )  $\delta$  157.9, 146.8, 137.1, 128.7, 127.7, 125.2, 119.7, 113.7, 55.2, 45.8, 38.5, 21.0, 14.0.

FT-IR (neat) 3101, 2997, 2955, 2930, 2870, 2833, 1610, 1584, 1510, 1463, 1440, 1378, 1302, 1246, 1177, 1113, 1036, 829, 788, 757, 743  $\text{cm}^{-1}$ .

MS (EI)  $m/z$  ( $\text{M}^+$ ) calcd for  $\text{C}_{15}\text{H}_{18}\text{OS}$ : 246.1, found: 246.1.

$[\alpha]_{\text{D}}^{25} = -36.0^\circ$  ( $c = 1.00$ ,  $\text{CHCl}_3$ ).

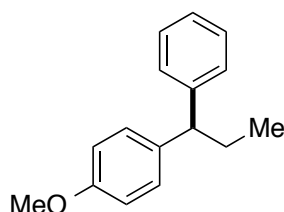

**(R)-1-Methoxy-4-(1-phenylpropyl)benzene (Table 3, Entry 1).** The title compound was prepared according to General Method B: 1-(4-Methoxyphenyl)propyl mesylate (0.70 mmol), phenylzinc iodide (1.7 equiv; prepared at r.t.),  $-40^\circ\text{C}$ , 48 h. The product was purified by column chromatography (hexanes  $\rightarrow$  25%  $\text{CH}_2\text{Cl}_2$ /hexanes). Colorless oil. First run: 150 mg (95%; 94% ee). Second run: 152 mg (96%; 94% ee).

The ee was determined by SFC on a CHIRALPAK AD-H column (2% MeOH in  $\text{CO}_2$ , 2.5 mL/min) with  $t_r = 3.67$  min (minor), 4.37 min (major).

$^1\text{H}$  NMR (500 MHz,  $\text{CDCl}_3$ )  $\delta$  7.33 – 7.10 (m, 7H), 6.86 – 6.77 (m, 2H), 3.77 (s, 3H), 3.74 (t,  $J = 7.8$  Hz, 1H), 2.10 – 1.98 (m, 2H), 0.89 (t,  $J = 7.3$  Hz, 3H).

$^{13}\text{C}$  NMR (126 MHz,  $\text{CDCl}_3$ )  $\delta$  157.8, 145.6, 137.3, 128.7, 128.3, 127.8, 125.9, 113.7, 55.2, 52.4, 28.7, 12.8.

FT-IR (neat) 3060, 3026, 2959, 2930, 2872, 2833, 1611, 1583, 1509, 1494, 1463, 1452, 1377, 1302, 1248, 1177, 1119, 1038, 819, 782, 761, 726  $\text{cm}^{-1}$ .

MS (EI)  $m/z$  ( $\text{M}^+$ ) calcd for  $\text{C}_{16}\text{H}_{18}\text{O}$ : 226.1, found: 226.1.

$[\alpha]_{\text{D}}^{25} = -6.5^\circ$  ( $c = 1.00$ ,  $\text{CHCl}_3$ ).

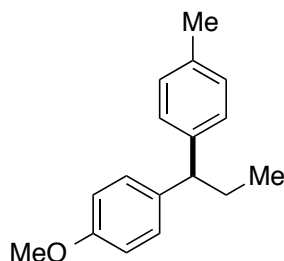

**(R)-1-Methoxy-4-(1-(*p*-tolyl)propyl)benzene (Table 3, Entry 2).** The title compound was prepared according to General Method B: 1-(4-Methoxyphenyl)propyl mesylate (0.70 mmol), *p*-tolylzinc iodide (1.5 equiv; prepared by the dropwise addition of *p*-tolylmagnesium bromide (3.2 mL, 1.0 M) to a solution of  $\text{ZnI}_2$  (1.22 g) in dry THF (3.3 mL), with the resulting white

suspension stirred vigorously at r.t. for 1 h before adding it to the reaction),  $-40\text{ }^{\circ}\text{C}$ , 48 h. The product was purified by column chromatography (hexanes  $\rightarrow$  25%  $\text{CH}_2\text{Cl}_2$ /hexanes). Colorless oil. First run: 152 mg (91%; 94% ee). Second run: 152 mg (91%; 93% ee).

The ee was determined by SFC on a CHIRALCEL OB-H column (3% MeOH in  $\text{CO}_2$ , 2.5 mL/min) with  $t_r = 8.74$  min (major), 11.17 min (minor).

$^1\text{H}$  NMR (500 MHz,  $\text{CDCl}_3$ )  $\delta$  7.17 – 7.05 (m, 6H), 6.87 – 6.76 (m, 2H), 3.77 (s, 3H), 3.71 (t,  $J = 7.6$  Hz, 1H), 2.30 (s, 3H), 2.08 – 1.96 (m, 2H), 0.88 (t,  $J = 7.3$  Hz, 3H).

$^{13}\text{C}$  NMR (126 MHz,  $\text{CDCl}_3$ )  $\delta$  157.7, 142.6, 137.6, 135.3, 129.0, 128.7, 127.6, 113.7, 55.2, 51.9, 28.8, 21.0, 12.8.

FT-IR (neat) 3000, 2958, 2930, 2872, 2833, 1610, 1583, 1508, 1462, 1377, 1301, 1248, 1177, 1122, 1038, 809, 770, 736, 716  $\text{cm}^{-1}$ .

MS (EI)  $m/z$  ( $\text{M}^+$ ) calcd for  $\text{C}_{17}\text{H}_{20}\text{O}$ : 240.1, found: 240.1.

$[\alpha]_{\text{D}}^{25} = +1.56^{\circ}$  ( $c = 1.00$ ,  $\text{CHCl}_3$ ).

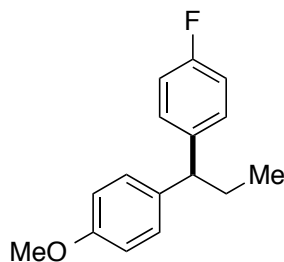

**(S)-1-Fluoro-4-(1-(4-methoxyphenyl)propyl)benzene (Table 3, Entry 3).** The title compound was prepared according to General Method B: 1-(4-Methoxyphenyl)propyl mesylate (0.70 mmol), 4-fluorophenylzinc iodide (1.7 equiv; prepared at  $-20\text{ }^{\circ}\text{C}$  and then r.t.),  $-40\text{ }^{\circ}\text{C}$ . The product was purified by column chromatography (hexanes  $\rightarrow$  25%  $\text{CH}_2\text{Cl}_2$ /hexanes). Colorless oil. First run: 160 mg (94%; 94% ee). Second run: 164 mg (96%; 94% ee).

The ee was determined by HPLC on a CHIRALCEL OJ-H column (2% *i*-PrOH/hexanes, 1.0 mL/min) with  $t_r = 14.11$  min (major), 15.98 min (minor).

$^1\text{H}$  NMR (500 MHz,  $\text{CDCl}_3$ )  $\delta$  7.20 – 7.08 (m, 4H), 7.01 – 6.91 (m, 2H), 6.86 – 6.79 (m, 2H), 3.77 (s, 3H), 3.72 (t,  $J = 7.8$  Hz, 1H), 2.07 – 1.94 (m, 2H), 0.88 (t,  $J = 7.3$  Hz, 3H).

$^{13}\text{C}$  NMR (126 MHz,  $\text{CDCl}_3$ )  $\delta$  161.2 (d,  $J = 243.7$  Hz), 157.9, 141.2 (d,  $J = 2.6$  Hz), 137.1 (d,  $J = 0.7$  Hz), 129.1 (d,  $J = 7.7$  Hz), 128.7, 115.0 (d,  $J = 21.0$  Hz), 113.8, 55.2, 51.6, 28.9, 12.7.

FT-IR (neat) 2961, 2932, 2873, 2834, 1610, 1583, 1508, 1463, 1441, 1378, 1302, 1249, 1178, 1158, 1119, 1038, 1014, 825, 781, 737  $\text{cm}^{-1}$ .

MS (EI)  $m/z$  ( $\text{M}^+$ ) calcd for  $\text{C}_{16}\text{H}_{17}\text{FO}$ : 244.1, found: 244.1.

$[\alpha]_{\text{D}}^{25} = -5.7^{\circ}$  ( $c = 1.00$ ,  $\text{CHCl}_3$ ).

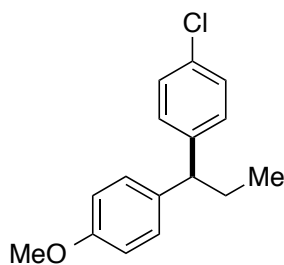

**(S)-1-Chloro-4-(1-(4-methoxyphenyl)propyl)benzene (Table 3, Entry 4).** The title compound was prepared according to General Method B: 1-(4-Methoxyphenyl)propyl mesylate (0.70 mmol), 4-chlorophenylzinc iodide (1.7 equiv; prepared at  $-20\text{ }^{\circ}\text{C}$  and then r.t.),  $-40\text{ }^{\circ}\text{C}$ . The product was purified by column chromatography (hexanes  $\rightarrow$  25%  $\text{CH}_2\text{Cl}_2$ /hexanes). Colorless oil. First run: 174 mg (95%; 94% ee). Second run: 172 mg (94%; 94% ee).

The ee was determined by HPLC on a CHIRALCEL OJ-H column (2% *i*-PrOH/hexanes, 1.0 mL/min) with  $t_r = 11.11$  min (major), 12.07 min (minor).

$^1\text{H}$  NMR (500 MHz,  $\text{CDCl}_3$ )  $\delta$  7.28 – 7.21 (m, 2H), 7.16 – 7.08 (m, 4H), 6.87 – 6.77 (m, 2H), 3.77 (s, 3H), 3.72 (t,  $J = 7.8$  Hz, 1H), 2.07 – 1.94 (m, 2H), 0.88 (t,  $J = 7.3$  Hz, 3H).

$^{13}\text{C}$  NMR (126 MHz,  $\text{CDCl}_3$ )  $\delta$  157.9, 144.1, 136.7, 131.6, 129.1, 128.7, 128.4, 113.8, 55.2, 51.7, 28.6, 12.7.

FT-IR (neat) 2960, 2931, 2873, 2834, 1610, 1583, 1511, 1490, 1462, 1407, 1378, 1302, 1249, 1176, 1120, 1092, 1038, 1014, 820, 757  $\text{cm}^{-1}$ .

MS (EI)  $m/z$  ( $\text{M}^+$ ) calcd for  $\text{C}_{16}\text{H}_{17}\text{ClO}$ : 260.1, found: 260.1.

$[\alpha]_D^{25} = -1.37^{\circ}$  ( $c = 1.00$ ,  $\text{CHCl}_3$ ).

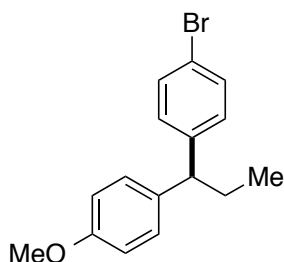

**(S)-1-Bromo-4-(1-(4-methoxyphenyl)propyl)benzene (Table 3, Entry 5).** The title compound was prepared according to General Method B: 1-(4-Methoxyphenyl)propyl mesylate (0.70 mmol), 4-bromophenylzinc iodide (1.7 equiv; prepared at  $-20\text{ }^{\circ}\text{C}$  and then r.t.),  $-45\text{ }^{\circ}\text{C}$ . The product was purified by column chromatography (hexanes  $\rightarrow$  25%  $\text{CH}_2\text{Cl}_2$ /hexanes). Colorless oil. First run: 180 mg (84%; 94% ee). Second run: 191 mg (89%; 94% ee).

The ee was determined by SFC on a CHIRALPAK AD-H column (3% MeOH in  $\text{CO}_2$ , 2.5 mL/min) with  $t_r = 7.59$  min (major), 9.20 min (minor).

$^1\text{H}$  NMR (500 MHz,  $\text{CDCl}_3$ )  $\delta$  7.43 – 7.34 (m, 2H), 7.16 – 7.04 (m, 4H), 6.87 – 6.77 (m, 2H), 3.77 (s, 3H), 3.70 (t,  $J = 7.8$  Hz, 1H), 2.07 – 1.94 (m, 2H), 0.88 (t,  $J = 7.3$  Hz, 3H).

$^{13}\text{C}$  NMR (126 MHz,  $\text{CDCl}_3$ )  $\delta$  157.9, 144.6, 136.6, 131.4, 129.6, 128.7, 119.7, 113.8, 55.2, 51.8, 28.6, 12.7.

FT-IR (neat) 2960, 2930, 2872, 2833, 1611, 1583, 1511, 1488, 1463, 1440, 1404, 1302, 1249, 1177, 1121, 1075, 1038, 1009, 818, 752  $\text{cm}^{-1}$ .

MS (EI)  $m/z$  ( $\text{M}^+$ ) calcd for  $\text{C}_{16}\text{H}_{17}\text{BrO}$ : 304.0, found: 304.0.



$[\alpha]_D^{25} = -0.17^\circ$  ( $c = 1.00$ ,  $\text{CHCl}_3$ ).

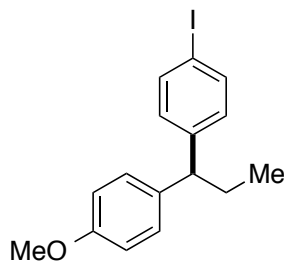

**(S)-1-Iodo-4-(1-(4-methoxyphenyl)propyl)benzene (Table 3, Entry 6).** The title compound was prepared according to General Method B: 1-(4-Methoxyphenyl)propyl mesylate (0.70 mmol), 4-iodophenylzinc iodide (1.5 equiv; prepared at  $-20^\circ\text{C}$  and then r.t.),  $-45^\circ\text{C}$ . The product was purified by column chromatography (hexanes  $\rightarrow$  25%  $\text{CH}_2\text{Cl}_2$ /hexanes). Colorless oil. First run: 165 mg (67%; 94% ee). Second run: 161 mg (65%; 94% ee).

The ee was determined by HPLC on a CHIRALPAK AD-H column (1% *i*-PrOH/hexanes, 1.0 mL/min) with  $t_r = 7.65$  min (minor), 8.34 min (major).

$^1\text{H}$  NMR (500 MHz,  $\text{CDCl}_3$ )  $\delta$  7.61 – 7.53 (m, 2H), 7.15 – 7.05 (m, 2H), 7.01 – 6.92 (m, 2H), 6.86 – 6.77 (m, 2H), 3.77 (s, 3H), 3.68 (t,  $J = 7.8$  Hz, 1H), 2.06 – 1.93 (m, 2H), 0.88 (t,  $J = 7.3$  Hz, 3H).

$^{13}\text{C}$  NMR (126 MHz,  $\text{CDCl}_3$ )  $\delta$  157.9, 145.3, 137.4, 136.6, 129.9, 128.7, 113.8, 91.1, 55.2, 51.9, 28.5, 12.7.

FT-IR (neat) 2958, 2929, 2871, 2832, 1611, 1583, 1511, 1483, 1462, 1400, 1302, 1248, 1177, 1122, 1037, 1005, 809, 749  $\text{cm}^{-1}$ .

MS (EI)  $m/z$  ( $\text{M}^+$ ) calcd for  $\text{C}_{16}\text{H}_{17}\text{IO}$ : 352.0, found: 352.0.

$[\alpha]_D^{25} = -0.87^\circ$  ( $c = 1.00$ ,  $\text{CHCl}_3$ ).

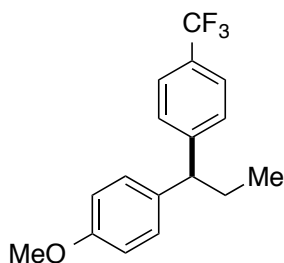

**(R)-1-Methoxy-4-(1-(4-(trifluoromethyl)phenyl)propyl)benzene (Table 3, Entry 7).** The title compound was prepared according to General Method B: 1-(4-Methoxyphenyl)propyl mesylate (0.70 mmol), 4-trifluoromethylphenylzinc iodide (1.7 equiv; prepared at  $-20^\circ\text{C}$  and then r.t.),  $-40^\circ\text{C}$ . The product was purified by column chromatography (hexanes  $\rightarrow$  25%  $\text{CH}_2\text{Cl}_2$ /hexanes). Colorless oil. First run: 201 mg (98%; 94% ee). Second run: 202 mg (98%; 94% ee).

The ee was determined by SFC on a CHIRALCEL OB-H column (1% MeOH in  $\text{CO}_2$ , 2.5 mL/min) with  $t_r = 6.22$  min (minor), 8.89 min (major).

$^1\text{H}$  NMR (500 MHz,  $\text{CDCl}_3$ )  $\delta$  7.56 – 7.49 (m, 2H), 7.38 – 7.28 (m, 2H), 7.18 – 7.09 (m, 2H), 6.89 – 6.80 (m, 2H), 3.81 (t,  $J = 7.8$  Hz, 1H), 3.78 (s, 3H), 2.13 – 1.99 (m, 2H), 0.90 (t,  $J = 7.3$  Hz, 3H).

$^{13}\text{C}$  NMR (126 MHz,  $\text{CDCl}_3$ )  $\delta$  158.1, 149.7 (d,  $J = 1.4$  Hz), 136.2, 128.7, 128.2 (q,  $J = 33.3$  Hz), 128.1, 125.3 (q,  $J = 3.7$  Hz), 124.3 (q,  $J = 272.4$  Hz), 113.9, 55.2, 52.2, 28.5, 12.7.

FT-IR (neat) 3034, 3001, 2963, 2934, 2876, 2836, 1617, 1584, 1510, 1464, 1442, 1417, 1379, 1325, 1303, 1250, 1178, 1163, 1122, 1067, 1038, 1018, 825  $\text{cm}^{-1}$ .

MS (EI)  $m/z$  ( $\text{M}^+$ ) calcd for  $\text{C}_{17}\text{H}_{17}\text{F}_3\text{O}$ : 294.1, found: 294.1.

$[\alpha]_{\text{D}}^{25} = -5.4^\circ$  ( $c = 1.00$ ,  $\text{CHCl}_3$ ).

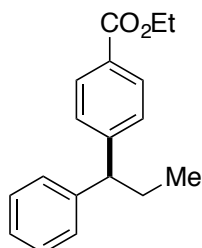

**(S)-Ethyl 4-(1-phenylpropyl)benzoate (Table 3, Entry 8).** The title compound was prepared according to General Method A: 1-Phenylpropyl mesylate (0.70 mmol), 4-ethoxycarbonylphenylzinc iodide (1.7 equiv; prepared at  $-20^\circ\text{C}$  and then r.t.),  $-40^\circ\text{C}$ . The product was purified by column chromatography (hexanes  $\rightarrow$  5%  $\text{Et}_2\text{O}$ /hexanes). Colorless oil. First run: 170 mg (91%; 93% ee). Second run: 171 mg (91%; 93% ee).

The ee was determined by chiral SFC on a CHIRALPAK IC column (3% MeOH in  $\text{CO}_2$ , 2.5 mL/min) with  $t_r = 6.63$  min (major), 7.52 min (minor).

$^1\text{H}$  NMR (500 MHz,  $\text{CDCl}_3$ )  $\delta$  8.00 – 7.90 (m, 2H), 7.34 – 7.13 (m, 7H), 4.35 (q,  $J = 7.1$  Hz, 2H), 3.85 (t,  $J = 7.8$  Hz, 1H), 2.15 – 2.03 (m, 2H), 1.37 (t,  $J = 7.1$  Hz, 3H), 0.90 (t,  $J = 7.3$  Hz, 3H).

$^{13}\text{C}$  NMR (126 MHz,  $\text{CDCl}_3$ )  $\delta$  166.6, 150.4, 144.2, 129.7, 128.5, 128.4, 127.89, 127.85, 126.3, 60.7, 53.2, 28.3, 14.3, 12.7.

FT-IR (neat) 3060, 3026, 2964, 2932, 2874, 1720, 1716, 1610, 1575, 1493, 1463, 1452, 1416, 1366, 1309, 1276, 1179, 1107, 1020, 865, 842, 775, 756, 736  $\text{cm}^{-1}$ .

MS (EI)  $m/z$  ( $\text{M}^+$ ) calcd for  $\text{C}_{18}\text{H}_{20}\text{O}_2$ : 268.1, found: 268.1.

$[\alpha]_{\text{D}}^{25} = +0.52^\circ$  ( $c = 1.00$ ,  $\text{CHCl}_3$ ).

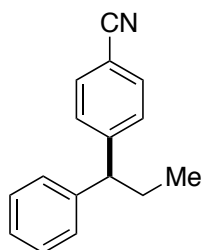

**(S)-4-(1-Phenylpropyl)benzonitrile (Table 3, Entry 9).** The title compound was prepared according to General Method A: 1-Phenylpropyl mesylate (0.70 mmol), 4-cyanophenylzinc iodide (1.7 equiv; prepared at  $-20^\circ\text{C}$  and then r.t.),  $-40^\circ\text{C}$ . The product was purified by column chromatography (hexanes  $\rightarrow$  5%  $\text{Et}_2\text{O}$ /hexanes). Colorless oil. First run: 129 mg (83%; 92% ee). Second run: 129 mg (83%; 92% ee).

The ee was determined by SFC on a CHIRALPAK AD-H column (3% MeOH in CO<sub>2</sub>, 2.5 mL/min) with t<sub>r</sub> = 4.94 min (major), 5.74 min (minor).

<sup>1</sup>H NMR (500 MHz, CDCl<sub>3</sub>) δ 7.61 – 7.53 (m, 2H), 7.37 – 7.14 (m, 7H), 3.85 (t, J = 7.8 Hz, 1H), 2.16 – 1.99 (m, 2H), 0.90 (t, J = 7.3 Hz, 3H).

<sup>13</sup>C NMR (126 MHz, CDCl<sub>3</sub>) δ 150.8, 143.4, 132.2, 128.67, 128.64, 127.8, 126.6, 119.0, 109.9, 53.3, 28.2, 12.6.

FT-IR (neat) 3061, 3027, 2964, 2931, 2874, 2227, 1606, 1502, 1492, 1452, 1414, 1380, 1176, 1123, 1020, 859, 841, 818, 763, 730 cm<sup>-1</sup>.

MS (EI) *m/z* (M<sup>+</sup>) calcd for C<sub>16</sub>H<sub>15</sub>N: 221.1, found: 221.1.

[α]<sub>D</sub><sup>25</sup> = +0.07° (c = 1.00, CHCl<sub>3</sub>).

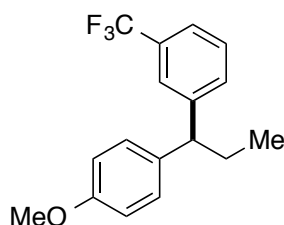

**(S)-1-(1-(4-Methoxyphenyl)propyl)-3-(trifluoromethyl)benzene (Table 3, Entry 10).** The title compound was prepared according to General Method B: 1-(4-Methoxyphenyl)propyl mesylate (0.70 mmol), 3-trifluoromethylphenylzinc iodide (1.7 equiv; prepared at -20 °C and then r.t.), -40 °C. The product was purified by column chromatography (hexanes → 25% CH<sub>2</sub>Cl<sub>2</sub>/hexanes). Colorless oil. First run: 196 mg (95%; 94% ee). Second run: 200 mg (97%; 94% ee).

The ee was determined by SFC on a CHIRALCEL OB-H column (1% MeOH in CO<sub>2</sub>, 2.5 mL/min) with t<sub>r</sub> = 3.92 min (minor), 4.51 min (major).

<sup>1</sup>H NMR (500 MHz, CDCl<sub>3</sub>) δ 7.50 – 7.33 (m, 4H), 7.17 – 7.08 (m, 2H), 6.89 – 6.79 (m, 2H), 3.80 (t, J = 7.7 Hz, 1H), 3.78 (s, 3H), 2.11 – 2.00 (m, 2H), 0.89 (t, J = 7.3 Hz, 3H).

<sup>13</sup>C NMR (126 MHz, CDCl<sub>3</sub>) δ 158.1, 146.5, 136.2, 131.2 (q, J = 1.3 Hz), 130.6 (q, J = 31.8 Hz), 128.76, 128.75, 124.4 (q, J = 3.8 Hz), 124.3 (q, J = 272.8 Hz), 122.9 (q, J = 3.9 Hz), 113.9, 55.2, 52.2, 28.7, 12.7.

FT-IR (neat) 3034, 3001, 2963, 2934, 2876, 2836, 1611, 1584, 1512, 1464, 1443, 1328, 1251, 1179, 1163, 1124, 1074, 1038, 900, 828, 802, 765, 735 cm<sup>-1</sup>.

MS (EI) *m/z* (M<sup>+</sup>) calcd for C<sub>17</sub>H<sub>17</sub>F<sub>3</sub>O: 294.1, found: 294.1.

[α]<sub>D</sub><sup>25</sup> = -7.5° (c = 1.00, CHCl<sub>3</sub>).

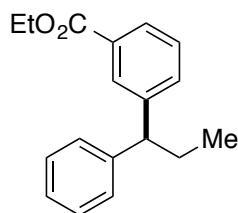

**(S)-Ethyl 3-(1-phenylpropyl)benzoate (Table 3, Entry 11).** The title compound was prepared according to General Method A: 1-Phenylpropyl mesylate (0.70 mmol), 3-ethoxycarbonylphenylzinc iodide (1.7 equiv; prepared at  $-20\text{ }^{\circ}\text{C}$  and then r.t.),  $-40\text{ }^{\circ}\text{C}$ . The product was purified by column chromatography (hexanes  $\rightarrow$  5% Et<sub>2</sub>O/hexanes). Colorless oil. First run: 170 mg (90%; 94% ee). Second run: 173 mg (93%; 93% ee).

The ee was determined by SFC on a CHIRALPAK IC column (2% MeOH in CO<sub>2</sub>, 2.5 mL/min) with  $t_r$  = 6.31 min (minor), 6.81 min (major).

<sup>1</sup>H NMR (500 MHz, CDCl<sub>3</sub>)  $\delta$  7.95 (td,  $J$  = 1.8, 0.9 Hz, 1H), 7.86 (dt,  $J$  = 7.6, 1.5 Hz, 1H), 7.43 – 7.39 (m, 1H), 7.38 – 7.14 (m, 6H), 4.37 (q,  $J$  = 7.2 Hz, 2H), 3.85 (t,  $J$  = 7.8 Hz, 1H), 2.17 – 2.04 (m, 2H), 1.39 (t,  $J$  = 7.1 Hz, 3H), 0.90 (t,  $J$  = 7.3 Hz, 3H).

<sup>13</sup>C NMR (126 MHz, CDCl<sub>3</sub>)  $\delta$  166.8, 145.5, 144.6, 132.5, 130.5, 129.0, 128.5, 128.4, 127.8, 127.3, 126.2, 60.9, 53.1, 28.5, 14.3, 12.7.

FT-IR (neat) 3061, 3026, 2963, 2932, 2873, 1720, 1602, 1586, 1494, 1463, 1452, 1391, 1367, 1278, 1185, 1104, 1084, 1025, 767, 752 cm<sup>-1</sup>.

MS (EI)  $m/z$  ( $M^+$ ) calcd for C<sub>18</sub>H<sub>20</sub>O<sub>2</sub>: 268.1, found: 268.1.

$[\alpha]_D^{25} = +3.3^{\circ}$  ( $c = 1.00$ , CHCl<sub>3</sub>).

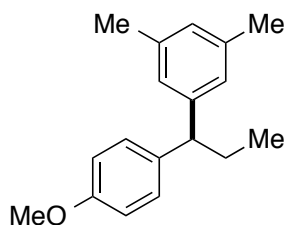

**(S)-1-(1-(4-Methoxyphenyl)propyl)-3,5-dimethylbenzene (Table 3, Entry 12).** The title compound was prepared according to General Method B: 1-(4-Methoxyphenyl)propyl mesylate (0.70 mmol), 3,5-dimethylphenylzinc iodide (1.7 equiv; prepared at r.t.),  $-40\text{ }^{\circ}\text{C}$ . The product was purified by column chromatography (hexanes  $\rightarrow$  25% CH<sub>2</sub>Cl<sub>2</sub>/hexanes). Colorless oil. First run: 153 mg (86%; 93% ee). Second run: 154 mg (87%; 92% ee).

The ee was determined by HPLC on a CHIRALCEL OJ-H column (2% *i*-PrOH/hexanes, 1.0 mL/min) with  $t_r$  = 7.67 min (minor), 10.68 min (major).

<sup>1</sup>H NMR (500 MHz, CDCl<sub>3</sub>)  $\delta$  7.19 – 7.11 (m, 2H), 6.86 – 6.77 (m, 5H), 3.77 (s, 3H), 3.66 (t,  $J$  = 7.8 Hz, 1H), 2.27 (d,  $J$  = 0.7 Hz, 6H), 2.07 – 1.95 (m, 2H), 0.88 (t,  $J$  = 7.3 Hz, 3H).

<sup>13</sup>C NMR (126 MHz, CDCl<sub>3</sub>)  $\delta$  157.7, 145.5, 137.6, 137.5, 128.7, 127.6, 125.6, 113.7, 55.2, 52.3, 28.8, 21.4, 12.9.

FT-IR (neat) 2958, 2930, 2872, 2833, 1608, 1583, 1511, 1462, 1376, 1302, 1248, 1177, 1118, 1038, 826, 798, 745 cm<sup>-1</sup>.

MS (EI)  $m/z$  ( $M^+$ ) calcd for C<sub>18</sub>H<sub>22</sub>O: 254.2, found: 254.1.

$[\alpha]_D^{25} = -1.61^\circ$  ( $c = 1.00$ ,  $\text{CHCl}_3$ ).

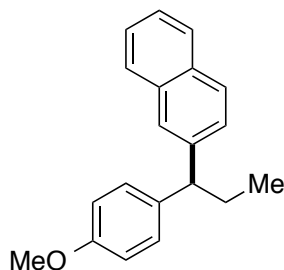

**(S)-2-(1-(4-Methoxyphenyl)propyl)naphthalene (Table 3, Entry 13).** The title compound was prepared according to General Method B: 1-(4-Methoxyphenyl)propyl mesylate (0.70 mmol), 2-naphthylzinc iodide (1.7 equiv; prepared by the dropwise addition of 2-naphthylmagnesium bromide (6.8 mL, 0.47 M) to a solution of  $\text{ZnI}_2$  (1.22 g) in dry THF (3.3 mL), with the resulting white suspension stirred vigorously at r.t. for 1 h before adding it to the reaction),  $-30^\circ\text{C}$ . The product was purified by column chromatography (hexanes  $\rightarrow$  25%  $\text{CH}_2\text{Cl}_2$ /hexanes). Colorless oil. First run: 178 mg (92%; 92% ee). Second run: 181 mg (94%; 92% ee).

The ee was determined by SFC on a CHIRALPAK IC column (3% MeOH in  $\text{CO}_2$ , 2.5 mL/min) with  $t_r = 8.20$  min (minor), 9.11 min (major).

$^1\text{H NMR}$  (500 MHz,  $\text{CDCl}_3$ )  $\delta$  7.83 – 7.67 (m, 4H), 7.49 – 7.37 (m, 2H), 7.32 (dd,  $J = 8.5, 1.8$  Hz, 1H), 7.25 – 7.14 (m, 2H), 6.88 – 6.78 (m, 2H), 3.92 (t,  $J = 7.7$  Hz, 1H), 3.77 (s, 3H), 2.23 – 2.06 (m, 2H), 0.94 (t,  $J = 7.3$  Hz, 3H).

$^{13}\text{C NMR}$  (126 MHz,  $\text{CDCl}_3$ )  $\delta$  157.8, 143.0, 137.2, 133.5, 132.1, 128.9, 127.9, 127.7, 127.5, 126.8, 125.8, 125.7, 125.2, 113.7, 55.2, 52.4, 28.5, 12.8.

FT-IR (neat) 3053, 2959, 2930, 2872, 2833, 1632, 1609, 1583, 1510, 1462, 1440, 1376, 1302, 1248, 1177, 1118, 1038, 826, 816, 745  $\text{cm}^{-1}$ .

MS (EI)  $m/z$  ( $\text{M}^+$ ) calcd for  $\text{C}_{20}\text{H}_{20}\text{O}$ : 276.1, found: 276.1.

$[\alpha]_D^{25} = +12.4^\circ$  ( $c = 1.00$ ,  $\text{CHCl}_3$ ).

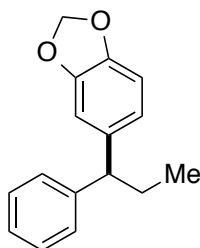

**(S)-5-(1-Phenylpropyl)benzo[d][1,3]dioxole (Table 3, Entry 14).** The title compound was prepared according to General Method A: 1-Phenylpropyl mesylate (0.70 mmol), benzo[d][1,3]dioxol-5-ylzinc iodide (1.7 equiv; prepared at r.t.),  $-40^\circ\text{C}$ . The product was purified by column chromatography (hexanes  $\rightarrow$  25%  $\text{CH}_2\text{Cl}_2$ /hexanes). Colorless oil. First run: 147 mg (88%; 94% ee). Second run: 145 mg (86%; 94% ee).

The ee was determined by SFC on a CHIRALPAK IC column (2% MeOH in CO<sub>2</sub>, 1.0 mL/min) with t<sub>r</sub> = 9.59 min (minor), 9.93 min (major).

<sup>1</sup>H NMR (500 MHz, CDCl<sub>3</sub>) δ 7.34 – 7.13 (m, 5H), 6.77 – 6.66 (m, 3H), 5.90 (q, J = 1.5 Hz, 2H), 3.71 (t, J = 7.8 Hz, 1H), 2.10 – 1.94 (m, 2H), 0.89 (t, J = 7.3 Hz, 3H).

<sup>13</sup>C NMR (126 MHz, CDCl<sub>3</sub>) δ 147.6, 145.7, 145.2, 139.2, 128.4, 127.7, 126.0, 120.8, 108.2, 108.0, 100.8, 52.9, 28.6, 12.7.

FT-IR (neat) 3060, 3025, 2961, 2930, 2873, 2775, 1601, 1502, 1486, 1438, 1377, 1363, 1245, 1185, 1103, 1040, 935, 862, 808, 762 cm<sup>-1</sup>.

MS (EI) *m/z* (M<sup>+</sup>) calcd for C<sub>16</sub>H<sub>16</sub>O<sub>2</sub>: 240.1, found: 240.1.

[α]<sub>D</sub><sup>25</sup> = +11.1° (c = 1.00, CHCl<sub>3</sub>).

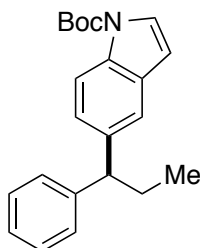

**(S)-*t*-Butyl 5-(1-phenylpropyl)-1H-indole-1-carboxylate (Table 3, Entry 15).** The title compound was prepared according to General Method A: 1-Phenylpropyl mesylate (0.70 mmol), 1-(*t*-butoxycarbonyl)-1H-indol-5-ylzinc iodide (1.7 equiv; prepared at -20 °C and then r.t.), -40 °C. The product was purified by column chromatography (hexanes → 25% CH<sub>2</sub>Cl<sub>2</sub>/hexanes). Colorless oil. First run: 182 mg (78%; 93% ee). Second run: 179 mg (76%; 93% ee).

The ee was determined by chiral SFC on a CHIRALCEL IC column (2% MeOH in CO<sub>2</sub>, 2.5 mL/min) with t<sub>r</sub> = 8.84 min (major), 9.82 min (minor).

<sup>1</sup>H NMR (500 MHz, CDCl<sub>3</sub>) δ 8.01 (d, J = 8.5 Hz, 1H), 7.56 (d, J = 3.5 Hz, 1H), 7.45 – 7.39 (m, 1H), 7.30 – 7.12 (m, 6H), 6.51 (dd, J = 3.7, 0.8 Hz, 1H), 3.89 (t, J = 7.8 Hz, 1H), 2.13 (pentet, J = 7.3 Hz, 2H), 1.65 (s, 9H), 0.92 (t, J = 7.3 Hz, 3H).

<sup>13</sup>C NMR (126 MHz, CDCl<sub>3</sub>) δ 145.7, 139.6, 130.7, 128.3, 127.9, 126.0, 125.9, 124.6, 119.8, 115.0, 107.3, 83.5, 81.0, 53.0, 28.8, 28.2, 27.9, 12.9.

FT-IR (neat) 3060, 3025, 2973, 2931, 2873, 1735, 1601, 1580, 1537, 1470, 1370, 1352, 1291, 1254, 1212, 1163, 1132, 1083, 1040, 1023, 884, 846, 809, 767, 726 cm<sup>-1</sup>.

MS (ESI) *m/z* ([M + H]<sup>+</sup>) calcd for C<sub>22</sub>H<sub>26</sub>NO<sub>2</sub>: 336.2, found: 336.2.

[α]<sub>D</sub><sup>25</sup> = +11.4° (c = 1.00, CHCl<sub>3</sub>).

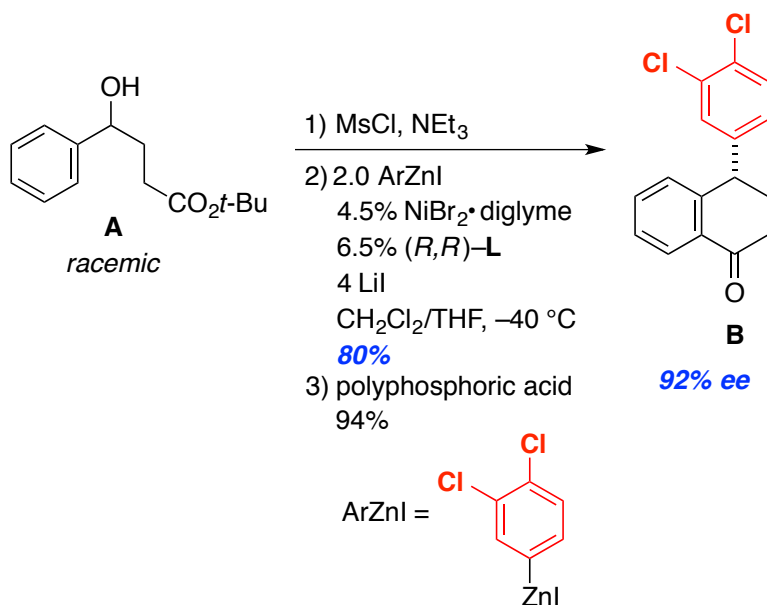

### Gram-scale synthesis of (*S*)-sertraline tetralone (eq 3).

**(*R*)-*t*-Butyl 4-(3,4-dichlorophenyl)-4-phenylbutanoate [147189-42-2].** The title compound was prepared according to General Method A, using NiBr<sub>2</sub>·diglyme (4.5%) and (*R,R*)-L (6.5%): *t*-Butyl 4-((methylsulfonyl)oxy)-4-phenylbutanoate (4.9 mmol), 3,4-dichlorophenylzinc iodide (2.0 equiv), -40 °C, 60 h. The product was purified by column chromatography (hexanes → 5% Et<sub>2</sub>O/hexanes). Colorless oil. 1.43 g (80%, 92% ee).

The ee was determined by HPLC on a CHIRALCEL OD-H column (1% *i*-PrOH/hexanes, 1.0 mL/min) with *t*<sub>r</sub> = 7.29 min (major), 8.41 min (minor).

**(*S*)-Sertraline tetralone.** A 20-mL vial was charged with (*R*)-*t*-butyl 4-(3,4-dichlorophenyl)-4-phenylbutanoate (1.43 g, 3.92 mmol) and polyphosphoric acid (7.0 mL). The resulting mixture was heated at 85 °C for 3 h under an atmosphere of nitrogen. Next, the mixture was allowed to cool to r.t., and then it was diluted with water (120 mL). The mixture was extracted with EtOAc (100 mL × 3). The combined organic layers were washed with saturated NaHCO<sub>3</sub> (100 mL) and brine (100 mL), dried over MgSO<sub>4</sub>, and concentrated. The residue was purified by flash chromatography (hexanes → 15% Et<sub>2</sub>O/hexanes), which provided (*S*)-sertraline tetralone as a light-tan solid (1.07 g, 94% yield, 92% ee).

The ee was determined by HPLC on a CHIRALCEL OD-H column (2% *i*-PrOH/hexanes, 1.0 mL/min) with *t*<sub>r</sub> = 14.78 min (major), 17.45 min (minor).

<sup>1</sup>H NMR (500 MHz, CDCl<sub>3</sub>) δ 8.12 (dd, *J* = 7.7, 1.7 Hz, 1H), 7.53 – 7.33 (m, 3H), 7.22 (d, *J* = 2.1 Hz, 1H), 7.00 – 6.89 (m, 2H), 4.27 (dd, *J* = 8.1, 4.6 Hz, 1H), 2.81 – 2.36 (m, 3H), 2.35 – 2.14 (m, 1H).

<sup>13</sup>C NMR (126 MHz, CDCl<sub>3</sub>) δ 197.3, 144.8, 144.0, 133.9, 132.8, 132.7, 131.0, 130.6, 130.5, 129.3, 127.9, 127.5, 127.4, 44.5, 36.5, 31.7.

FT-IR (neat) 3354, 3062, 3026, 2951, 2867, 1686, 1597, 1560, 1468, 1452, 1399, 1329, 1284, 1253, 1235, 1200, 1133, 1112, 1030, 924, 880, 847, 823, 774, 729, 721, 710 cm<sup>-1</sup>.

MS (EI) *m/z* (*M*<sup>+</sup>) calcd for C<sub>16</sub>H<sub>12</sub>Cl<sub>2</sub>O: 290.0, found: 290.0.

[α]<sub>D</sub><sup>25</sup> = +61.2° (*c* = 1.00, benzene). Lit.<sup>2</sup> [α]<sub>D</sub><sup>25</sup> = +63.8° (*c* = 1.16, benzene; 94% ee).

(2) Roesner, S.; Casatejada, J. M.; Elford, T. G.; Sonawane, R. P.; Aggarwal, V. K. *Org. Lett.* **2011**, *13*, 5740–5743.

#### IV. Assignment of Absolute Configuration

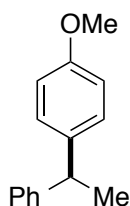

**(S)-1-Methoxy-4-(1-phenylethyl)benzene: Product from Table 2, Entry 1, run with (S,S)-L.** To determine the absolute stereochemistry, the optical rotation of this compound was compared with a literature value:  $[\alpha]_{\text{D}}^{25} = +8.7^{\circ}$  ( $c = 1.0$ ,  $\text{CHCl}_3$ ; 88% ee); lit.<sup>3</sup>  $[\alpha]_{\text{D}}^{20} = +5.0^{\circ}$  ( $c = 0.8$ ,  $\text{CHCl}_3$ ; 96% ee).

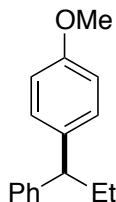

**(S)-1-Methoxy-4-(1-phenylpropyl)benzene: Product from Table 2, Entry 2, run with (S,S)-L.** To determine the absolute stereochemistry, the optical rotation of this compound was compared with a literature value:  $[\alpha]_{\text{D}}^{25} = +5.8^{\circ}$  ( $c = 1.0$ ,  $\text{CHCl}_3$ ; 94% ee); lit.<sup>4</sup>  $[\alpha]_{\text{D}}^{23} = +5.0^{\circ}$  ( $c = 1.0$ ,  $\text{CDCl}_3$ ; 77% ee).

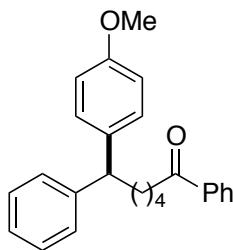

**(S)-6-(4-Methoxyphenyl)-1,6-diphenylhexan-1-one: Product from Table 2, Entry 13, run with (S,S)-L.** Crystals suitable for X-ray crystallography were grown in hexanes.

- 
- (3) Nave, S.; Sonawane, R. P.; Elford, T. G.; Aggarwal, V. K. *J Am Chem. Soc.* **2010**, *132*, 17096–17098.
- (4) Tolstoy, P.; Engman, M.; Paptchikhine, A.; Bergquist, J.; Church, T. L.; Leung, A. W.-M.; Andersson, P. G. *J. Am. Chem. Soc.* **2009**, *131*, 8855–8860.



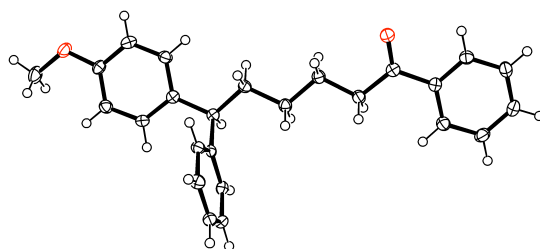

### A. Crystal Data

|                         |                                 |                     |
|-------------------------|---------------------------------|---------------------|
| Empirical Formula       | $C_{25}H_{26}O_2$               |                     |
| Formula Weight          | 358.64                          |                     |
| Crystal Color, Habit    | colorless, block                |                     |
| Crystal Dimensions      | 0.20 X 0.10 X 0.10 mm           |                     |
| Crystal System          | orthorhombic                    |                     |
| Lattice Type            | Primitive                       |                     |
| Lattice Parameters      | $a = 5.42580(10) \text{ \AA}$   | $\alpha = 90^\circ$ |
|                         | $b = 8.18170(10) \text{ \AA}$   | $\beta = 90^\circ$  |
|                         | $c = 43.389(3) \text{ \AA}$     | $\gamma = 90^\circ$ |
|                         | $V = 1926.13(14) \text{ \AA}^3$ |                     |
| Space Group             | $P2_12_12_1$                    |                     |
| Z value                 | 4                               |                     |
| D <sub>calc</sub>       | 1.236 g/cm <sup>3</sup>         |                     |
| F <sub>000</sub>        | 768.00                          |                     |
| $\mu(\text{CuK}\alpha)$ | 0.597 mm <sup>-1</sup>          |                     |

### B. Intensity Measurements

|                             |                                                                             |
|-----------------------------|-----------------------------------------------------------------------------|
| Diffractometer              | Rigaku Saturn944+ CCD                                                       |
| Radiation                   | $\text{CuK}\alpha$ ( $\lambda = 1.54187 \text{ \AA}$ )                      |
| Detector Aperture           | 94 mm x 94 mm                                                               |
| $2\theta_{\text{max}}$      | 136.46°                                                                     |
| No. of Reflections Measured | Total: 64719 Unique: 3533 ( $R_{\text{int}} = 0.0721$ ) Friedel pairs: 1422 |
| Corrections                 | Lorentz-polarization, Absorption (trans. factors: 0.890 - 0.943)            |

### C. Structure Solution and Refinement

|                                    |                                                                                                                         |
|------------------------------------|-------------------------------------------------------------------------------------------------------------------------|
| Structure Solution                 | Direct Methods                                                                                                          |
| Refinement                         | Full-matrix least-squares on $F^2$                                                                                      |
| Function Minimized                 | $\Sigma w (F_o^2 - F_c^2)^2$                                                                                            |
| Least Squares Weights              | $w = 1 / [ \sigma^2 (F_o^2) + (0.0538 \cdot P)^2 + 0.3123 \cdot P ]$<br>where $P = (\text{Max}(F_o^2, 0) + 2F_c^2) / 3$ |
| No. Observations (All reflections) | 3533                                                                                                                    |

|                                       |                                     |
|---------------------------------------|-------------------------------------|
| No. Variables                         | 245                                 |
| Reflection/Parameter Ratio            | 14.42                               |
| Residuals: R1 ( $I > 2.00\sigma(I)$ ) | 0.0352                              |
| Residuals: R (All reflections)        | 0.0360                              |
| Residuals: wR2 (All reflections)      | 0.0949                              |
| Goodness of Fit Indicator             | 1.144                               |
| Max Shift/Error in Final Cycle        | 0.001                               |
| Flack parameter                       | 0.0(2)                              |
| Hooft parameter                       | 0.01(8)                             |
| Maximum peak in Final Diff. Map       | $0.527 \text{ e}^- / \text{\AA}^3$  |
| Minimum peak in Final Diff. Map       | $-0.524 \text{ e}^- / \text{\AA}^3$ |

#### D. Experimental Details

The crystal sample was mounted in a Hampton Research loop with immersion oil. All measurements were made on a Rigaku Saturn944+ CCD diffractometer with filtered Cu-K $\alpha$  radiation at a temperature of  $-180^\circ\text{C}$ . The structure was solved by direct methods<sup>5</sup> and expanded using Fourier techniques. The non-hydrogen atoms were refined anisotropically. Hydrogen atoms were refined using the riding model. The absolute structure was deduced based on the Flack parameter, 0.0(2).<sup>6</sup> The Hooft absolute structure parameter  $\gamma = 0.01(8)$ <sup>7</sup> was calculated using PLATON,<sup>8</sup> and confirms the assigned absolute configuration.

Table 1. Atomic coordinates ( $\times 10^4$ ) and equivalent isotropic displacement parameters ( $\text{\AA}^2 \times 10^3$ ).  $U_{\text{eq}}$  is defined as 1/3 of the trace of the orthogonalised  $U_{ij}$  tensor.

| atom | x        | y           | z          | $U_{\text{eq}}$ |
|------|----------|-------------|------------|-----------------|
| O2   | -3021(2) | -2247.2(15) | -2132.1(2) | 28.4(3)         |
| O1   | 6644(2)  | 326.6(14)   | -4395.1(2) | 28.6(3)         |
| C1   | 4958(3)  | -194.1(18)  | -4553.6(3) | 19.9(3)         |
| C9   | 2739(3)  | -938.8(18)  | -4057.9(3) | 21.2(3)         |
| C13  | -2024(3) | -2591.8(17) | -3085.6(3) | 18.2(3)         |
| C11  | 527(3)   | -1854.1(17) | -3567.6(3) | 19.1(3)         |
| C10  | 639(3)   | -1920.7(18) | -3919.4(3) | 20.6(3)         |
| C12  | -1778(3) | -2690.5(18) | -3436.2(3) | 18.1(3)         |
| C16  | -2790(3) | -2413.4(18) | -2445.9(3) | 21.2(3)         |
| C18  | -3956(3) | -3414.2(18) | -2943.3(3) | 21.3(3)         |
| C2   | 5067(3)  | 4.3(17)     | -4897.8(3) | 19.0(3)         |
| C8   | 2756(3)  | -1014.0(19) | -4408.9(3) | 21.7(3)         |
| C14  | -470(3)  | -1672.8(19) | -2897.4(3) | 22.1(3)         |
| C25  | -168(3)  | -5585.3(18) | -3451.8(3) | 20.1(3)         |
| C7   | 3264(3)  | -640.7(19)  | -5093.2(3) | 23.3(3)         |
| C6   | 3408(3)  | -364(2)     | -5408.5(3) | 26.8(3)         |

- (5) Sheldrick, G.M. *Acta Cryst.* **2008**, A64, 112–122.  
(6) Flack, H. D. *Acta Cryst.* **1983**, A39, 876–881.  
(7) Hooft, R. W. W.; Straver, L. H.; Spek, A.L. *J. Appl. Cryst.* **2008**, 41, 96–103.  
(8) (a) Spek, A. L. *PLATON, A Multipurpose Crystallographic Tool*; Utrecht University, Utrecht, The Netherlands, 2010. (b) Spek, A. L. *Acta Cryst.* **2009**, D65, 148–155.

|     |          |             |            |         |
|-----|----------|-------------|------------|---------|
| C4  | 7125(3)  | 1176.5(19)  | -5338.1(3) | 24.0(3) |
| C20 | -1923(3) | -4452.0(17) | -3546.6(3) | 17.3(3) |
| C23 | -2030(3) | -7675.9(18) | -3765.9(3) | 22.5(3) |
| C5  | 5326(3)  | 552(2)      | -5530.2(3) | 24.7(3) |
| C15 | -837(3)  | -1584(2)    | -2581.6(3) | 24.4(3) |
| C17 | -4363(3) | -3340(2)    | -2627.7(3) | 22.7(3) |
| C22 | -3818(3) | -6575.5(19) | -3856.6(3) | 22.0(3) |
| C24 | -214(3)  | -7176.0(18) | -3561.1(3) | 23.0(3) |
| C3  | 7001(3)  | 911.4(18)   | -5022.4(3) | 21.9(3) |
| C21 | -3763(3) | -4974.4(18) | -3748.3(3) | 19.4(3) |
| C19 | -5116(3) | -3005(2)    | -1992.7(3) | 32.5(4) |

Table 2. Atomic coordinates and  $U_{eq}$  of hydrogen atoms

| atom | x     | y     | z     | $U_{eq}$ |
|------|-------|-------|-------|----------|
| H9A  | 4293  | -1356 | -3980 | 25       |
| H9B  | 2592  | 192   | -3993 | 25       |
| H11A | 546   | -721  | -3502 | 23       |
| H11B | 1982  | -2380 | -3484 | 23       |
| H10A | 807   | -3052 | -3983 | 25       |
| H10B | -906  | -1515 | -4002 | 25       |
| H12  | -3207 | -2120 | -3523 | 22       |
| H18  | -5015 | -4038 | -3064 | 26       |
| H8A  | 2724  | -2151 | -4472 | 26       |
| H8B  | 1268  | -499  | -4486 | 26       |
| H14  | 840   | -1108 | -2985 | 27       |
| H25  | 1052  | -5271 | -3313 | 24       |
| H7   | 1972  | -1253 | -5012 | 28       |
| H6   | 2212  | -796  | -5539 | 32       |
| H4   | 8423  | 1777  | -5421 | 29       |
| H23  | -2042 | -8740 | -3841 | 27       |
| H5   | 5401  | 745   | -5741 | 30       |
| H15  | 227   | -967  | -2460 | 29       |
| H17  | -5673 | -3903 | -2539 | 27       |
| H22  | -5062 | -6905 | -3990 | 26       |
| H24  | 982   | -7915 | -3497 | 28       |
| H3   | 8210  | 1340  | -4894 | 26       |
| H21  | -4972 | -4241 | -3811 | 23       |
| H19A | -6592 | -2618 | -2090 | 49       |
| H19B | -5162 | -2737 | -1777 | 49       |
| H19C | -5003 | -4169 | -2017 | 49       |

Table 3. Bond lengths ( $\text{\AA}$ )

|      |      |            |      |      |          |
|------|------|------------|------|------|----------|
| atom | atom | distance   | atom | atom | distance |
| O2   | C16  | 1.3743(16) | C18  | C17  | 1.388(2) |
| O2   | C19  | 1.429(2)   | C2   | C7   | 1.398(2) |

|     |     |            |
|-----|-----|------------|
| O1  | C1  | 1.2213(18) |
| C1  | C2  | 1.5031(18) |
| C1  | C8  | 1.507(2)   |
| C9  | C10 | 1.518(2)   |
| C9  | C8  | 1.5243(19) |
| C13 | C12 | 1.5293(18) |
| C13 | C18 | 1.390(2)   |
| C13 | C14 | 1.394(2)   |
| C11 | C10 | 1.5285(18) |
| C11 | C12 | 1.5356(19) |
| C12 | C20 | 1.521(2)   |
| C16 | C15 | 1.389(2)   |
| C16 | C17 | 1.387(2)   |

|     |     |          |
|-----|-----|----------|
| C2  | C3  | 1.394(2) |
| C14 | C15 | 1.386(2) |
| C25 | C20 | 1.391(2) |
| C25 | C24 | 1.385(2) |
| C7  | C6  | 1.389(2) |
| C6  | C5  | 1.387(2) |
| C4  | C5  | 1.382(2) |
| C4  | C3  | 1.389(2) |
| C20 | C21 | 1.395(2) |
| C23 | C22 | 1.381(2) |
| C23 | C24 | 1.389(2) |
| C22 | C21 | 1.392(2) |

Table 4. Anisotropic displacement parameters ( $\text{\AA}^2 \times 10^3$ ). The anisotropic displacement factor exponent takes the form:

$$-2\pi^2[h^2a^2U_{11}+2hka*b*U_{12}]$$

| atom | U <sub>11</sub> | U <sub>22</sub> | U <sub>33</sub> | U <sub>12</sub> | U <sub>13</sub> | U <sub>23</sub> |
|------|-----------------|-----------------|-----------------|-----------------|-----------------|-----------------|
| O2   | 28.1(6)         | 39.5(7)         | 17.7(5)         | -5.4(4)         | 1.0(4)          | -3.0(5)         |
| O1   | 25.9(6)         | 37.8(7)         | 22.1(5)         | 2.4(4)          | -3.0(4)         | -8.4(5)         |
| C1   | 20.2(7)         | 18.1(7)         | 21.5(7)         | 0.6(5)          | -1.4(6)         | 3.2(6)          |
| C9   | 22.6(7)         | 19.3(7)         | 21.7(7)         | 1.6(5)          | -0.4(6)         | 0.2(6)          |
| C13  | 19.1(7)         | 15.4(7)         | 20.3(7)         | -0.9(5)         | -0.2(5)         | 3.5(6)          |
| C11  | 21.4(7)         | 15.2(7)         | 20.8(7)         | 0.5(5)          | 0.0(6)          | -0.2(6)         |
| C10  | 22.1(7)         | 19.1(7)         | 20.6(7)         | 1.0(5)          | 0.7(5)          | 0.5(6)          |
| C12  | 18.1(7)         | 17.3(7)         | 18.8(6)         | 0.4(5)          | -0.4(5)         | 1.3(6)          |
| C16  | 21.4(7)         | 24.6(8)         | 17.8(6)         | -2.7(6)         | -0.2(6)         | 4.3(7)          |
| C18  | 21.9(7)         | 20.6(7)         | 21.3(7)         | -2.8(6)         | -2.0(6)         | -3.5(6)         |
| C2   | 19.4(7)         | 18.2(7)         | 19.4(7)         | 0.1(5)          | 0.8(6)          | 2.9(6)          |
| C8   | 20.2(7)         | 23.5(8)         | 21.4(7)         | 2.4(6)          | 0.2(6)          | -1.6(6)         |
| C14  | 19.9(7)         | 22.5(7)         | 24.0(7)         | -2.0(6)         | 0.9(6)          | -4.0(6)         |
| C25  | 20.2(7)         | 18.0(7)         | 22.0(7)         | 0.7(5)          | -1.7(6)         | -2.0(6)         |
| C7   | 22.4(7)         | 23.6(8)         | 23.8(7)         | -0.2(6)         | 1.8(6)          | -1.5(7)         |
| C6   | 25.7(8)         | 32.7(9)         | 22.2(7)         | -4.9(6)         | -3.6(6)         | -1.8(7)         |
| C4   | 26.9(8)         | 21.9(7)         | 23.3(7)         | 1.6(6)          | 6.1(6)          | -0.2(7)         |
| C20  | 19.2(7)         | 17.9(7)         | 14.8(6)         | 0.4(5)          | 4.0(5)          | -2.3(6)         |
| C23  | 27.8(8)         | 19.5(7)         | 20.2(6)         | -2.4(5)         | 3.0(6)          | -2.7(7)         |
| C5   | 30.9(8)         | 25.7(8)         | 17.5(7)         | 0.3(6)          | 2.0(6)          | 4.0(7)          |
| C15  | 23.0(7)         | 26.1(8)         | 24.2(7)         | -5.8(6)         | -4.0(6)         | -0.6(7)         |
| C17  | 22.0(7)         | 22.5(8)         | 23.5(7)         | -1.3(6)         | 3.0(6)          | -1.9(6)         |
| C22  | 24.4(7)         | 25.4(8)         | 16.2(6)         | -1.9(6)         | -1.7(6)         | -4.3(7)         |
| C24  | 23.0(7)         | 18.8(7)         | 27.1(7)         | 0.8(6)          | -0.9(6)         | 1.8(6)          |
| C3   | 22.0(7)         | 20.8(7)         | 22.8(7)         | -0.6(5)         | -0.9(6)         | 0.1(7)          |
| C21  | 20.0(7)         | 21.3(7)         | 16.9(6)         | 1.6(5)          | -0.2(5)         | 1.5(6)          |
| C19  | 29.4(8)         | 48.2(10)        | 20.0(7)         | -0.3(7)         | 5.2(7)          | 0.4(8)          |

# V. NMR Spectra

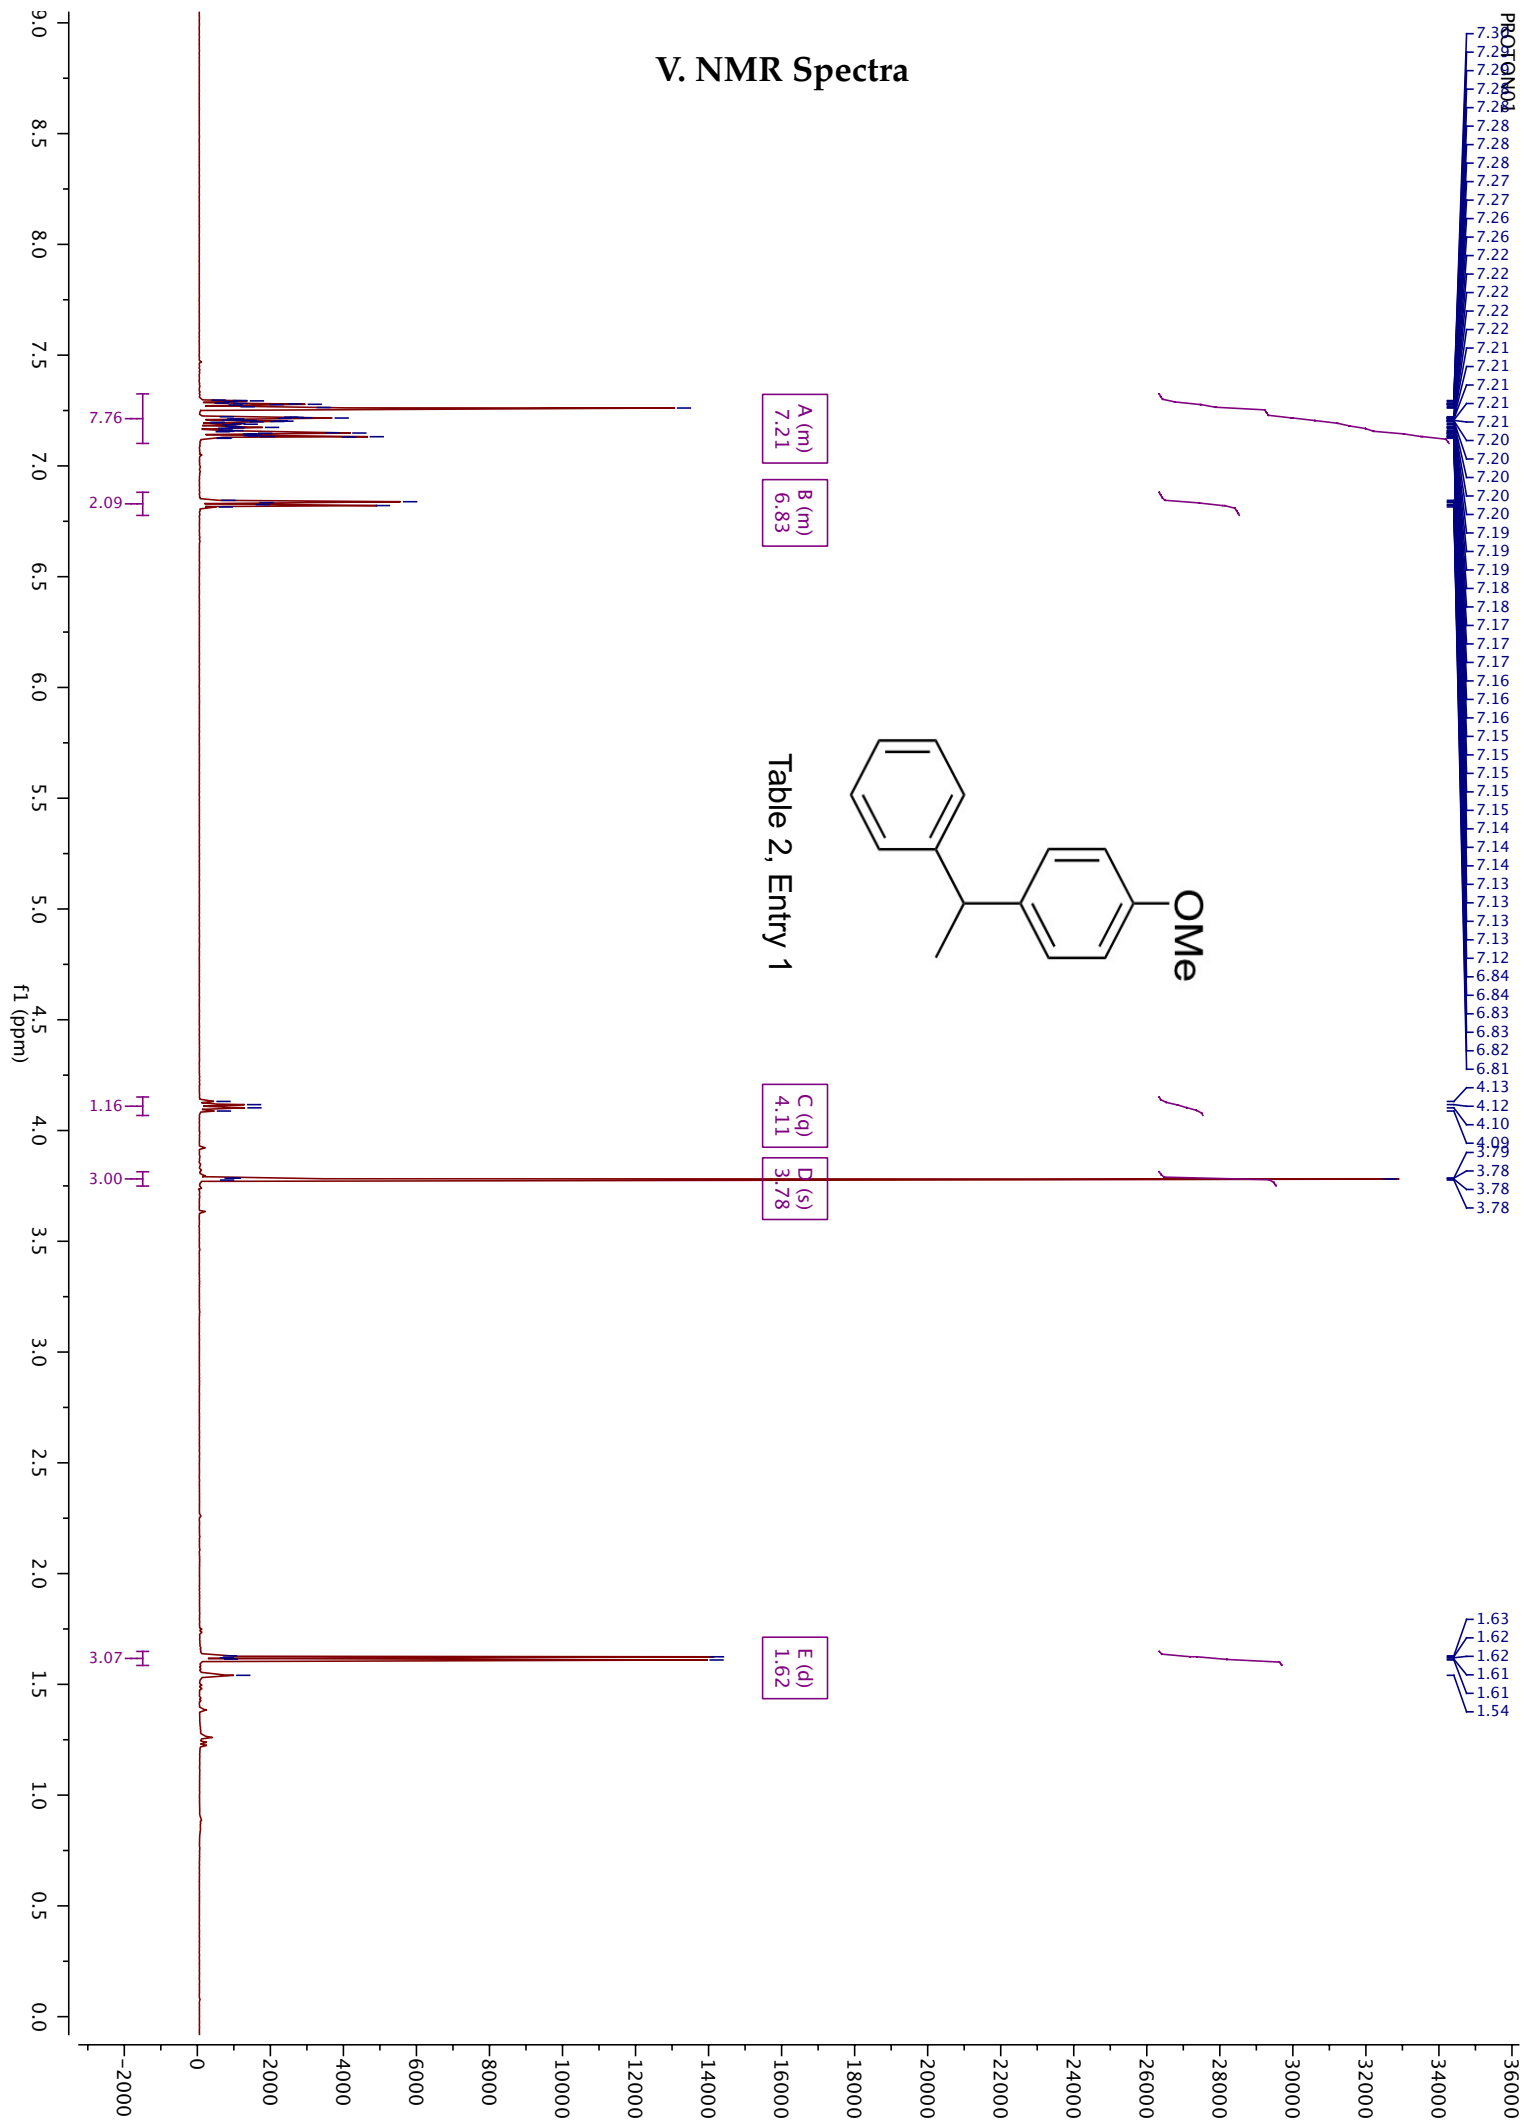

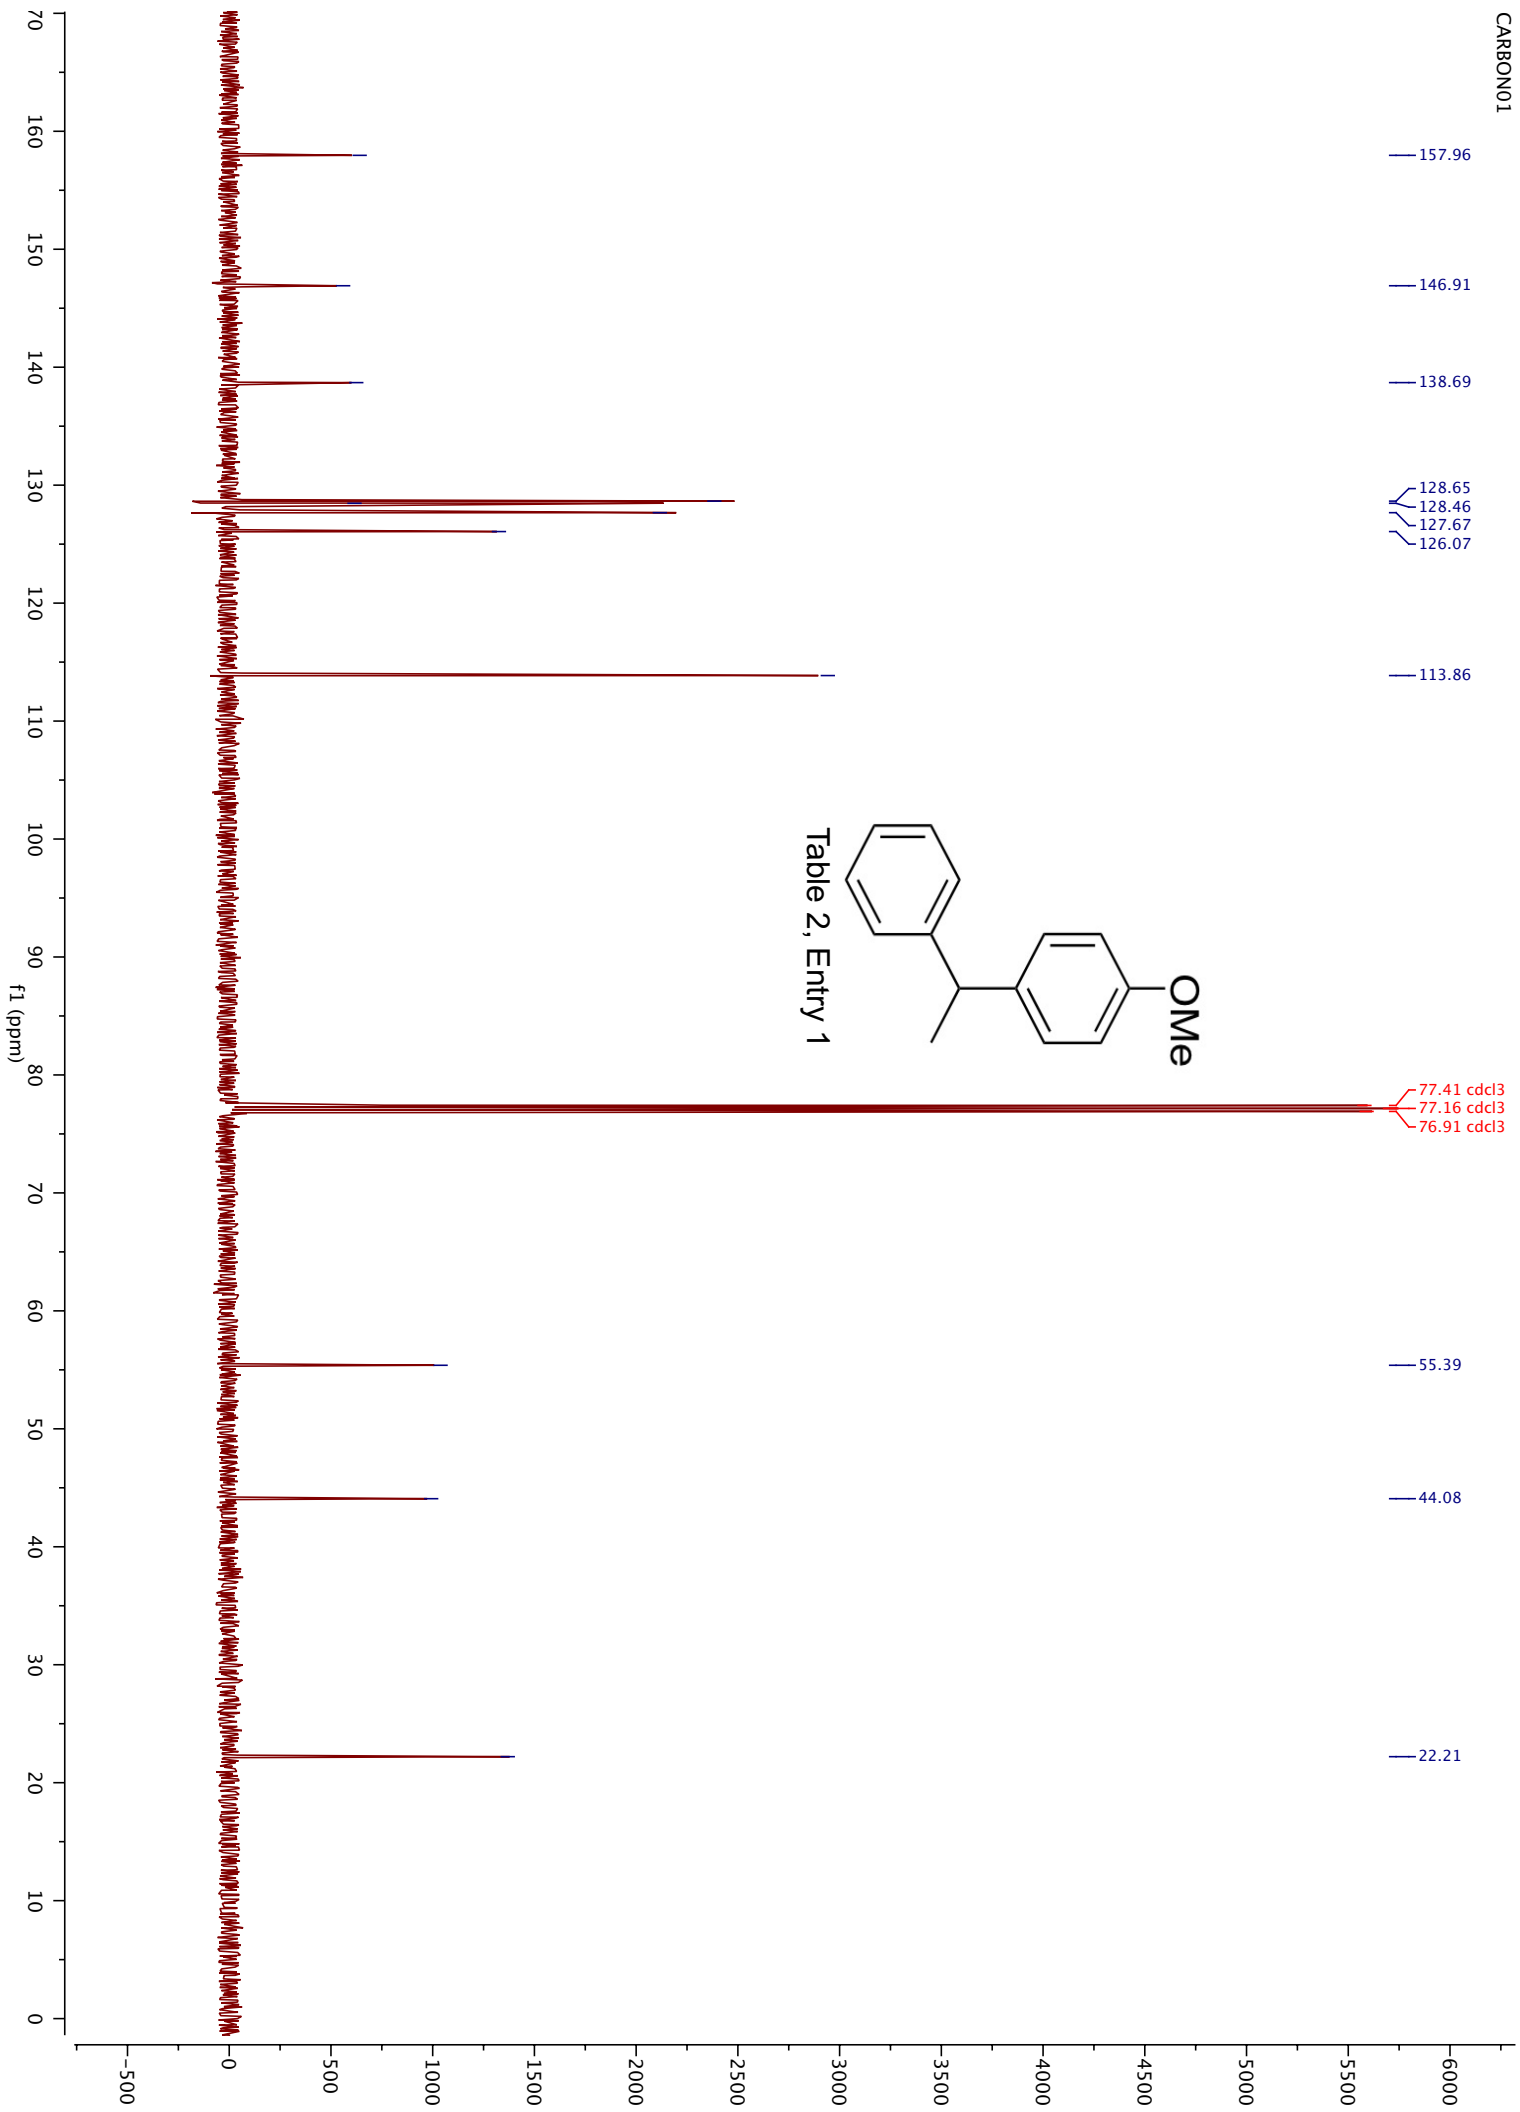

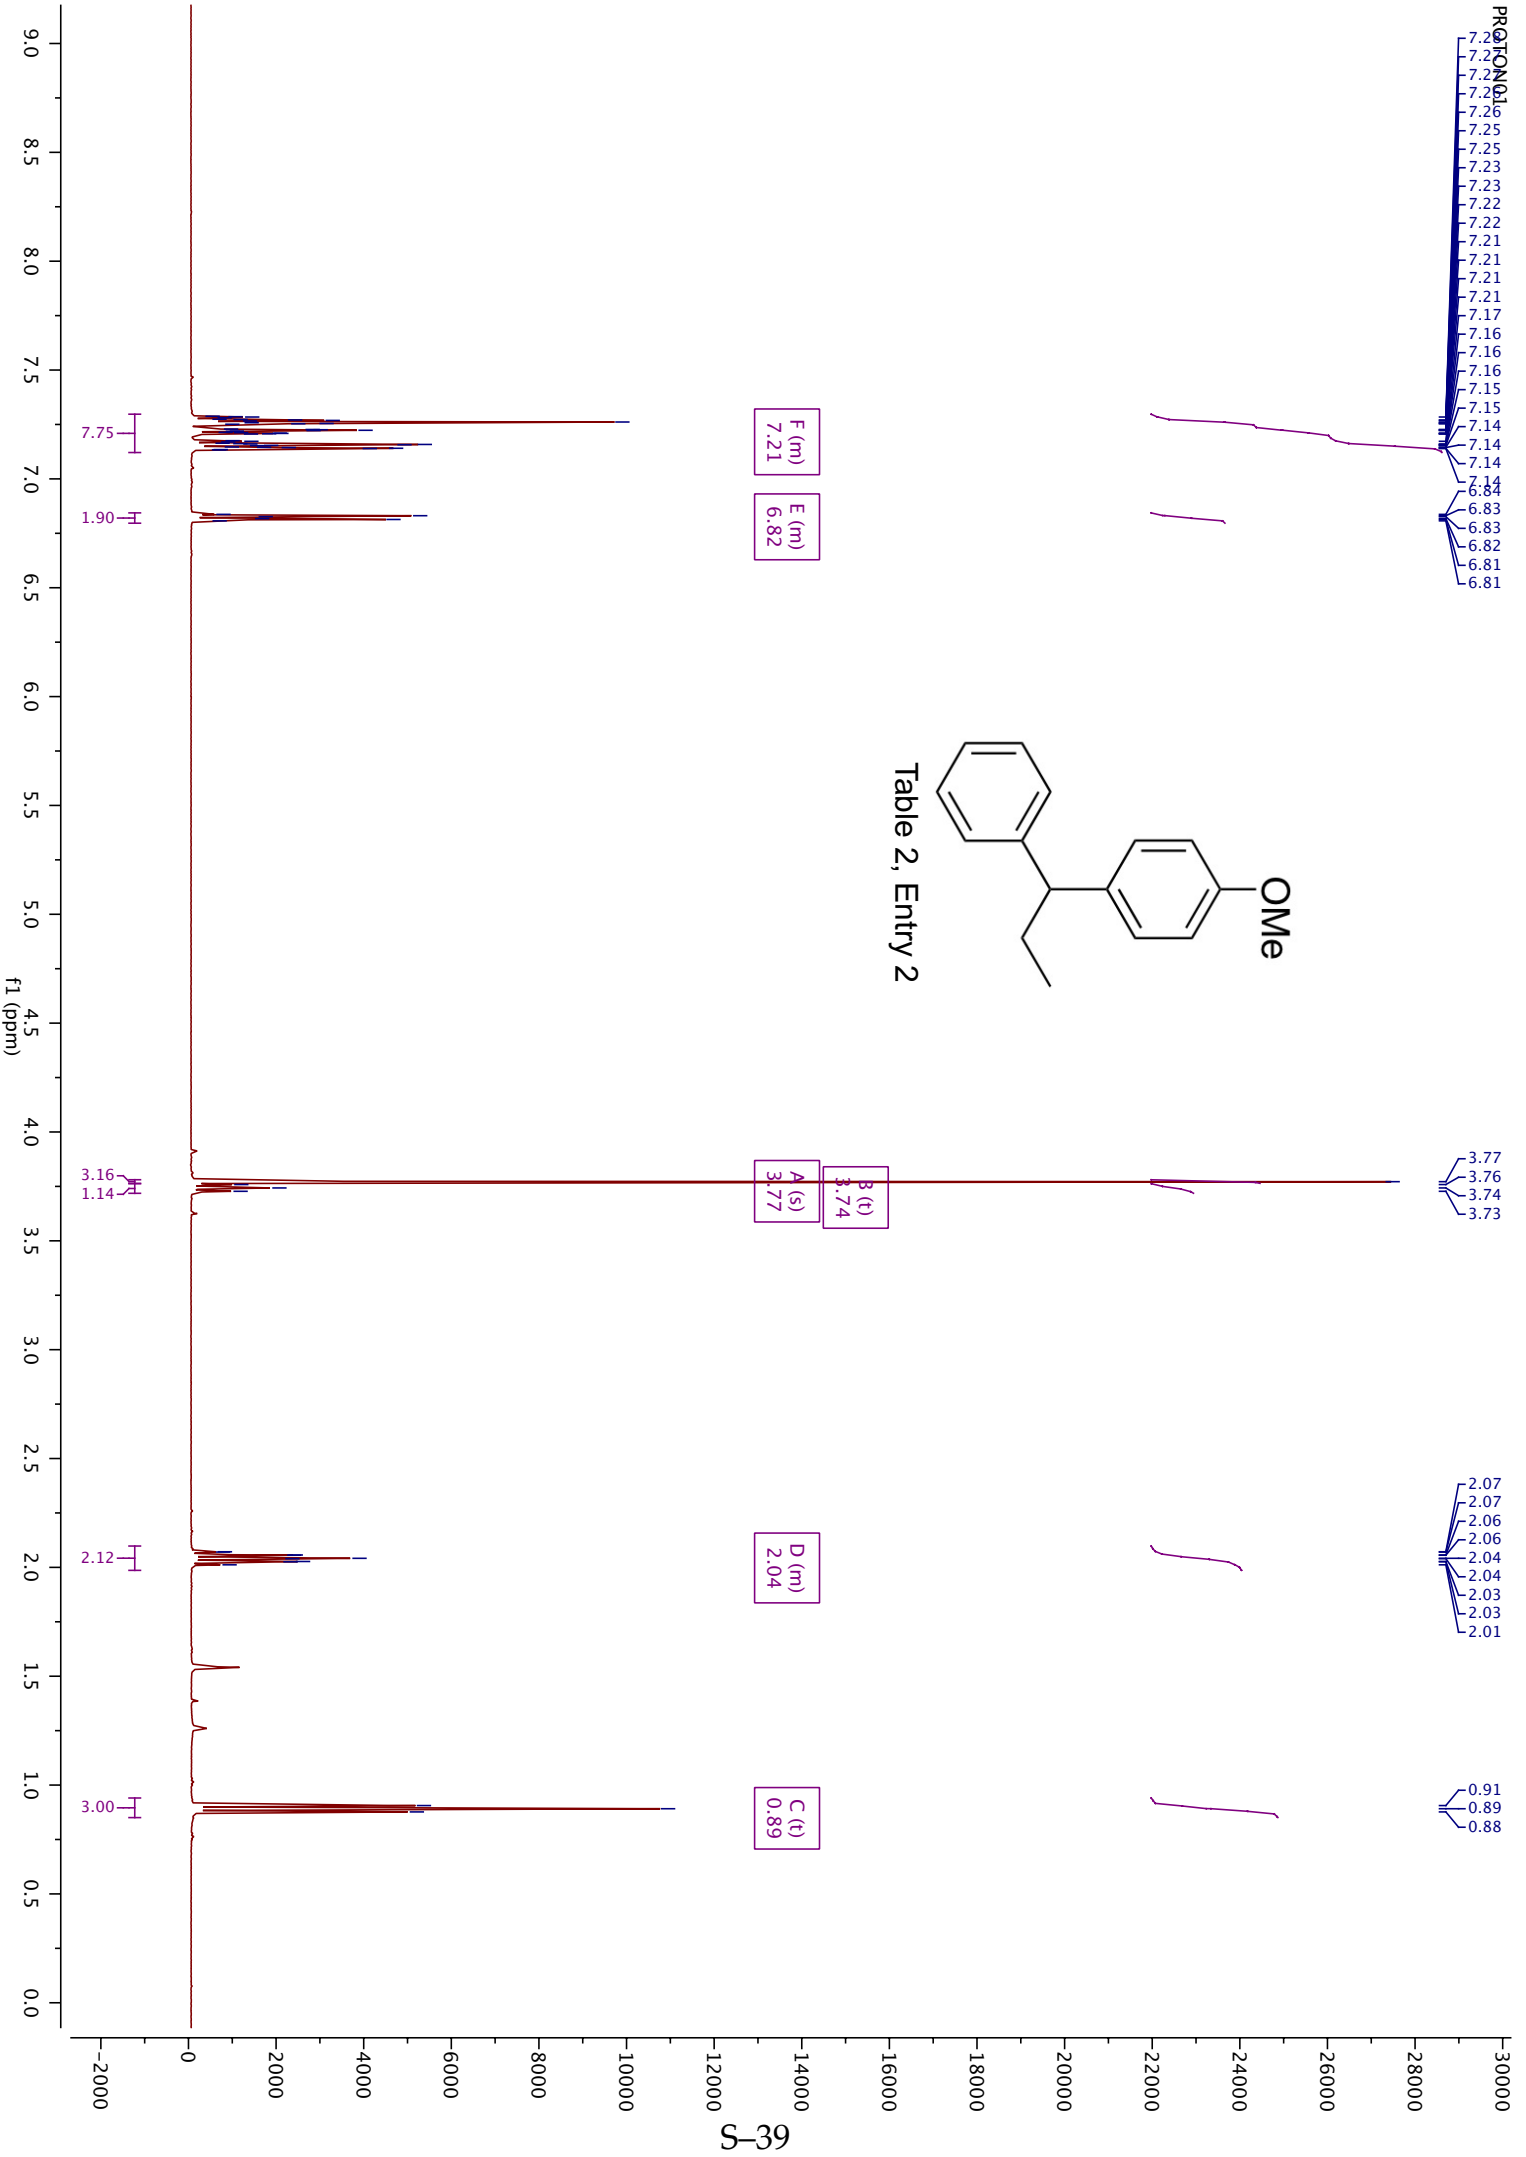

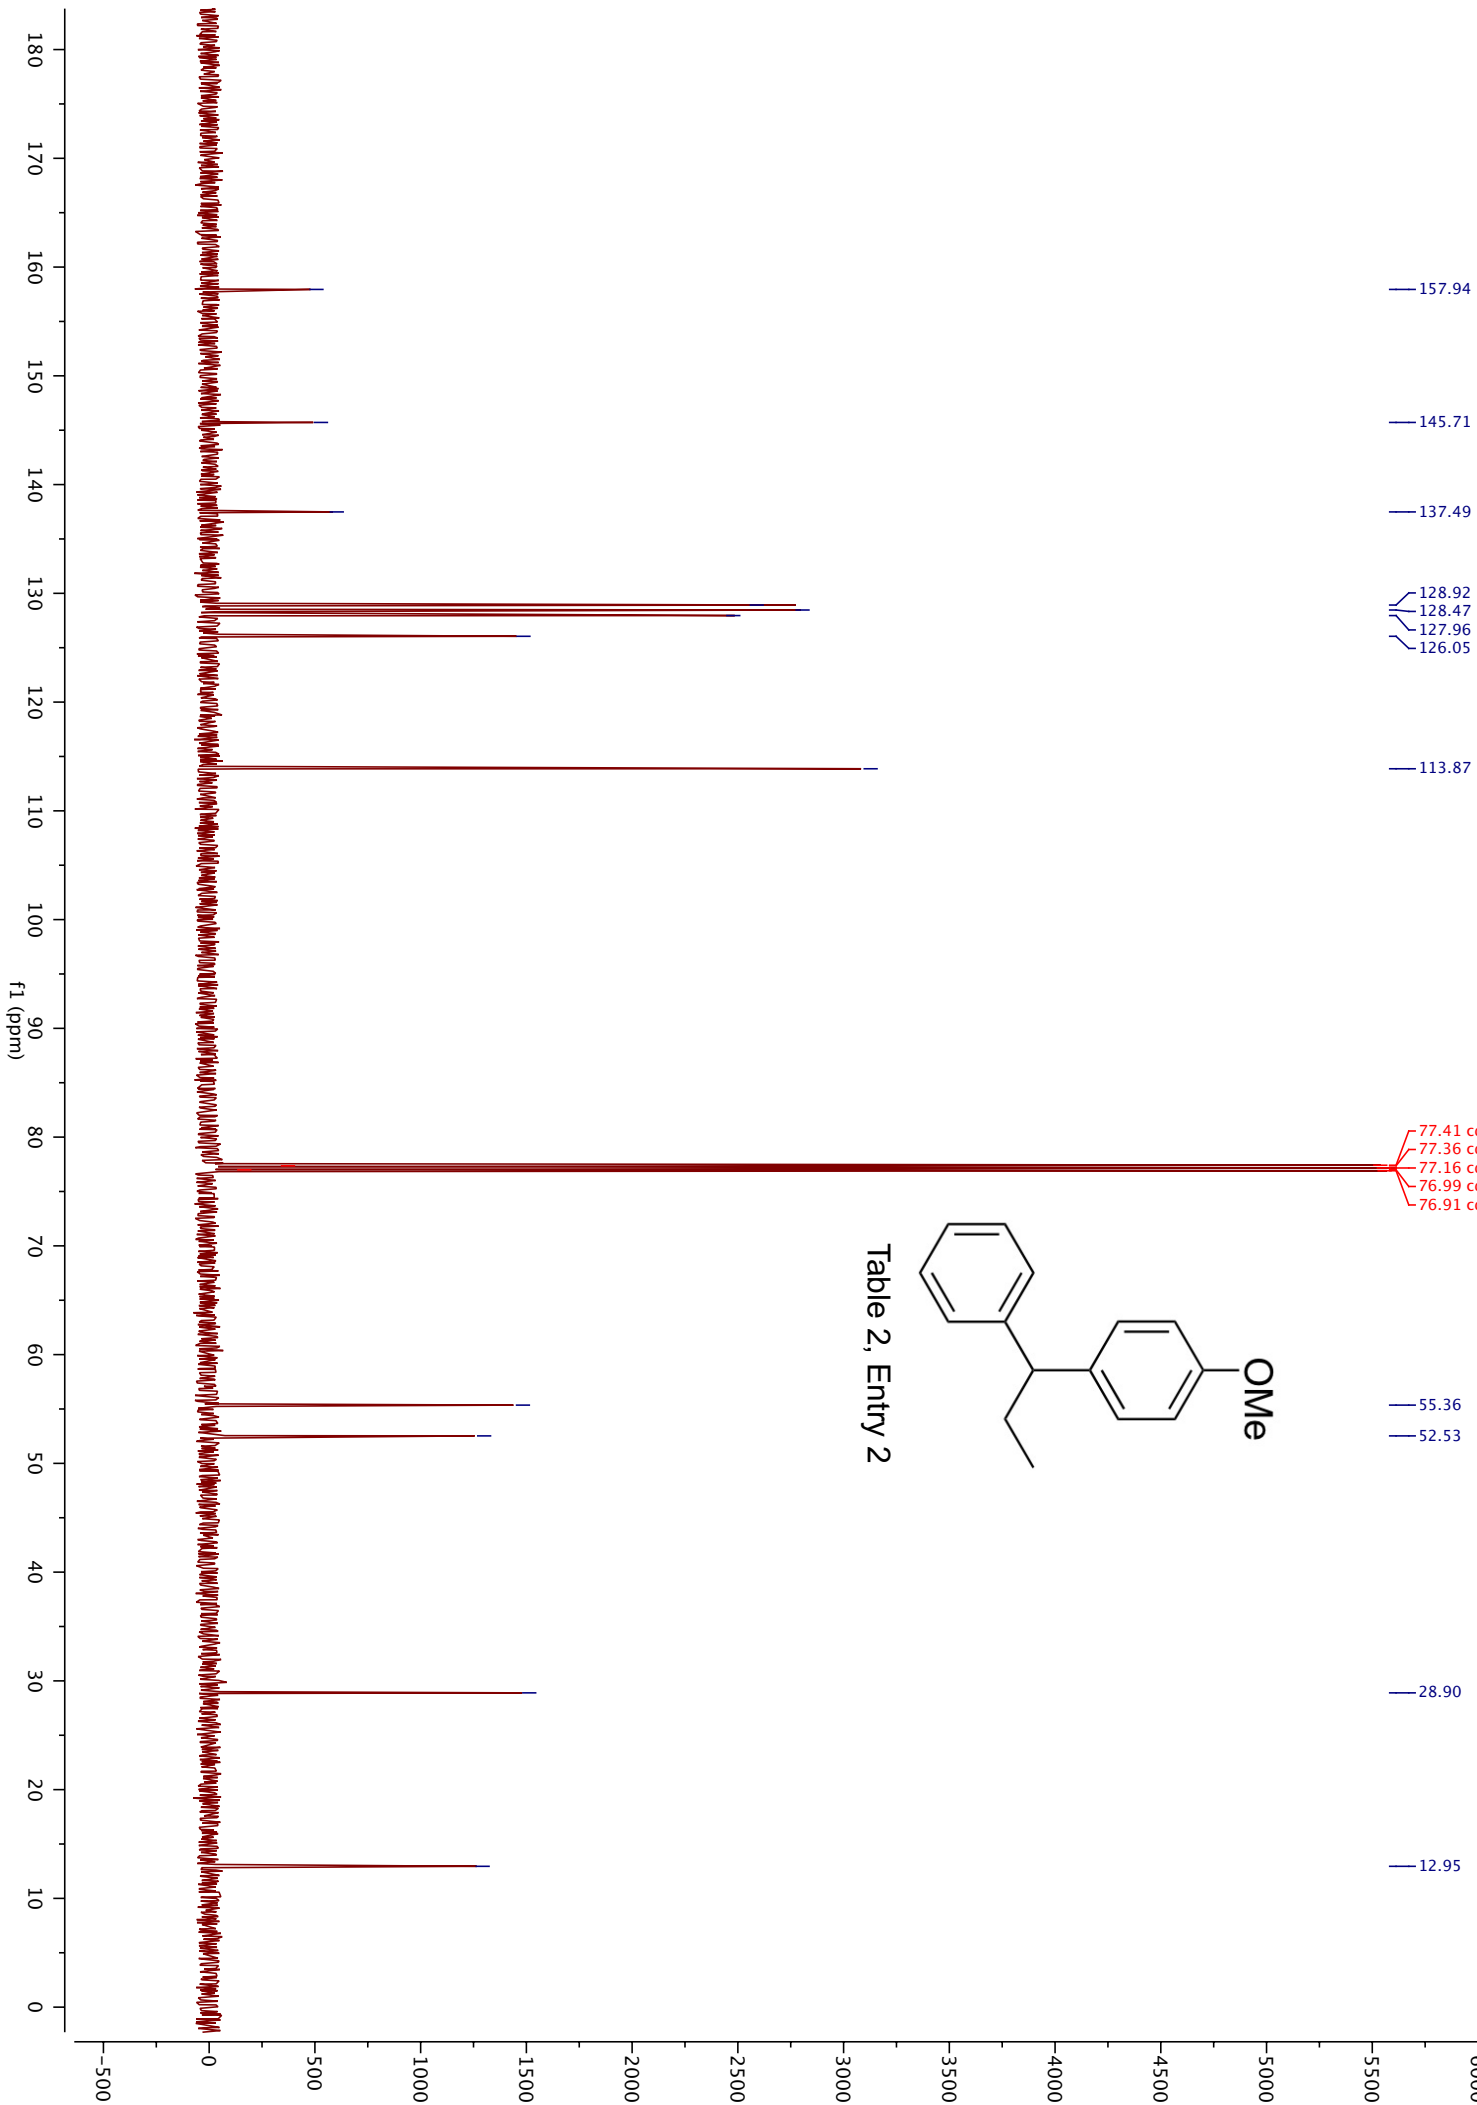



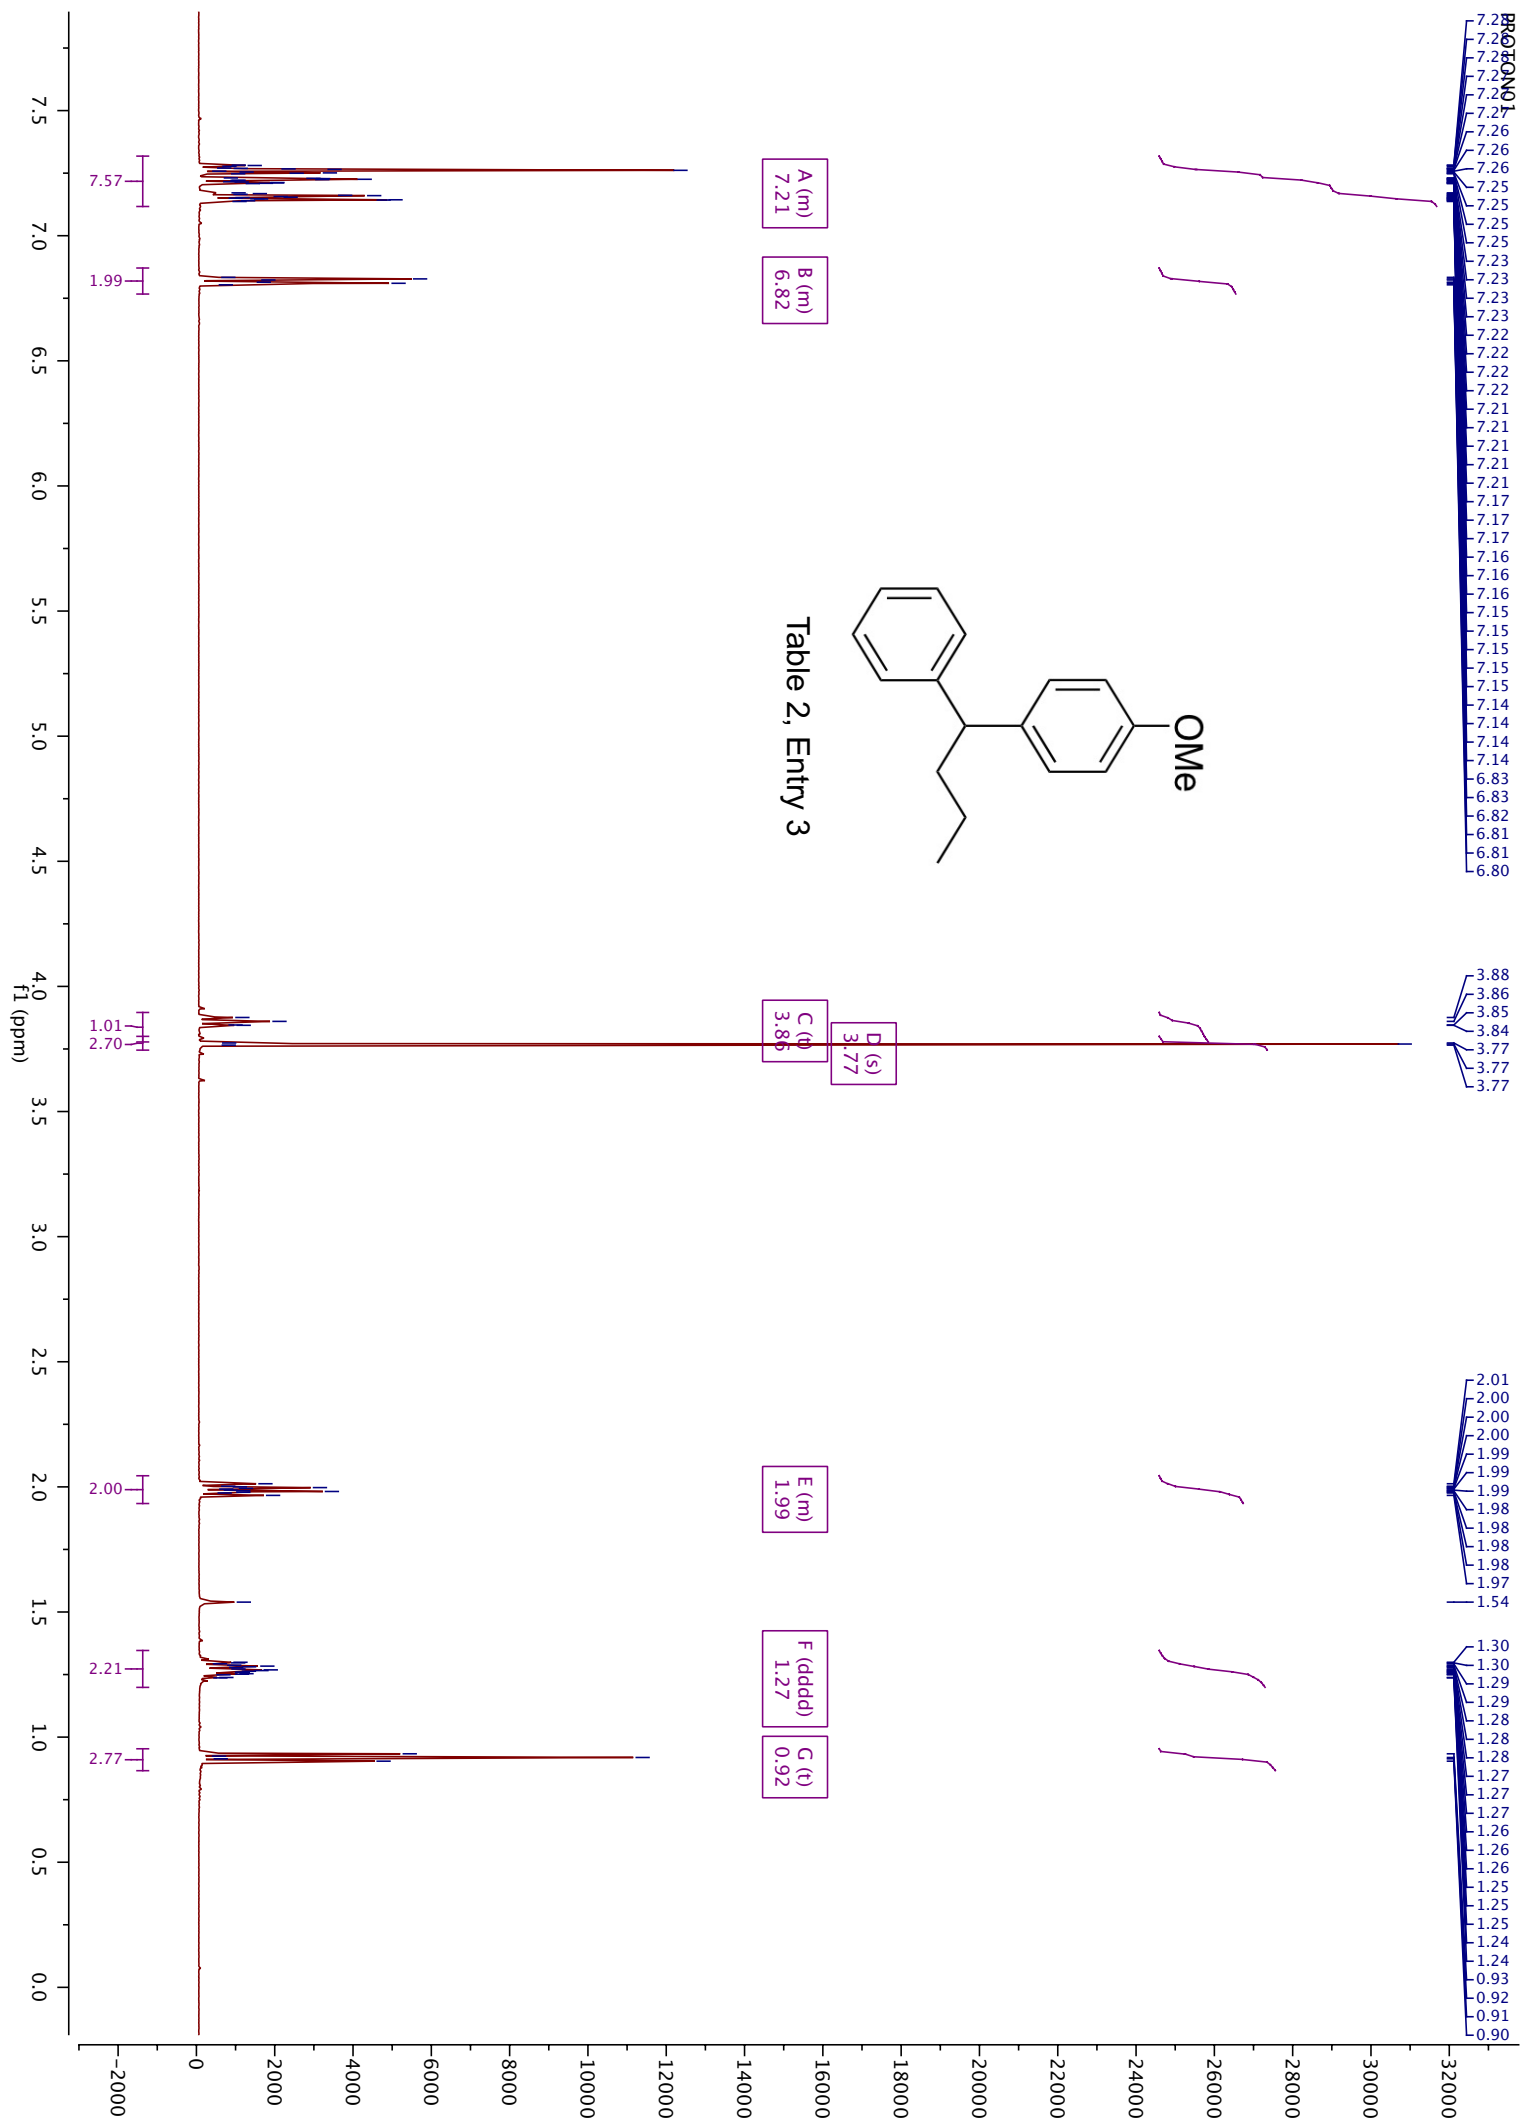

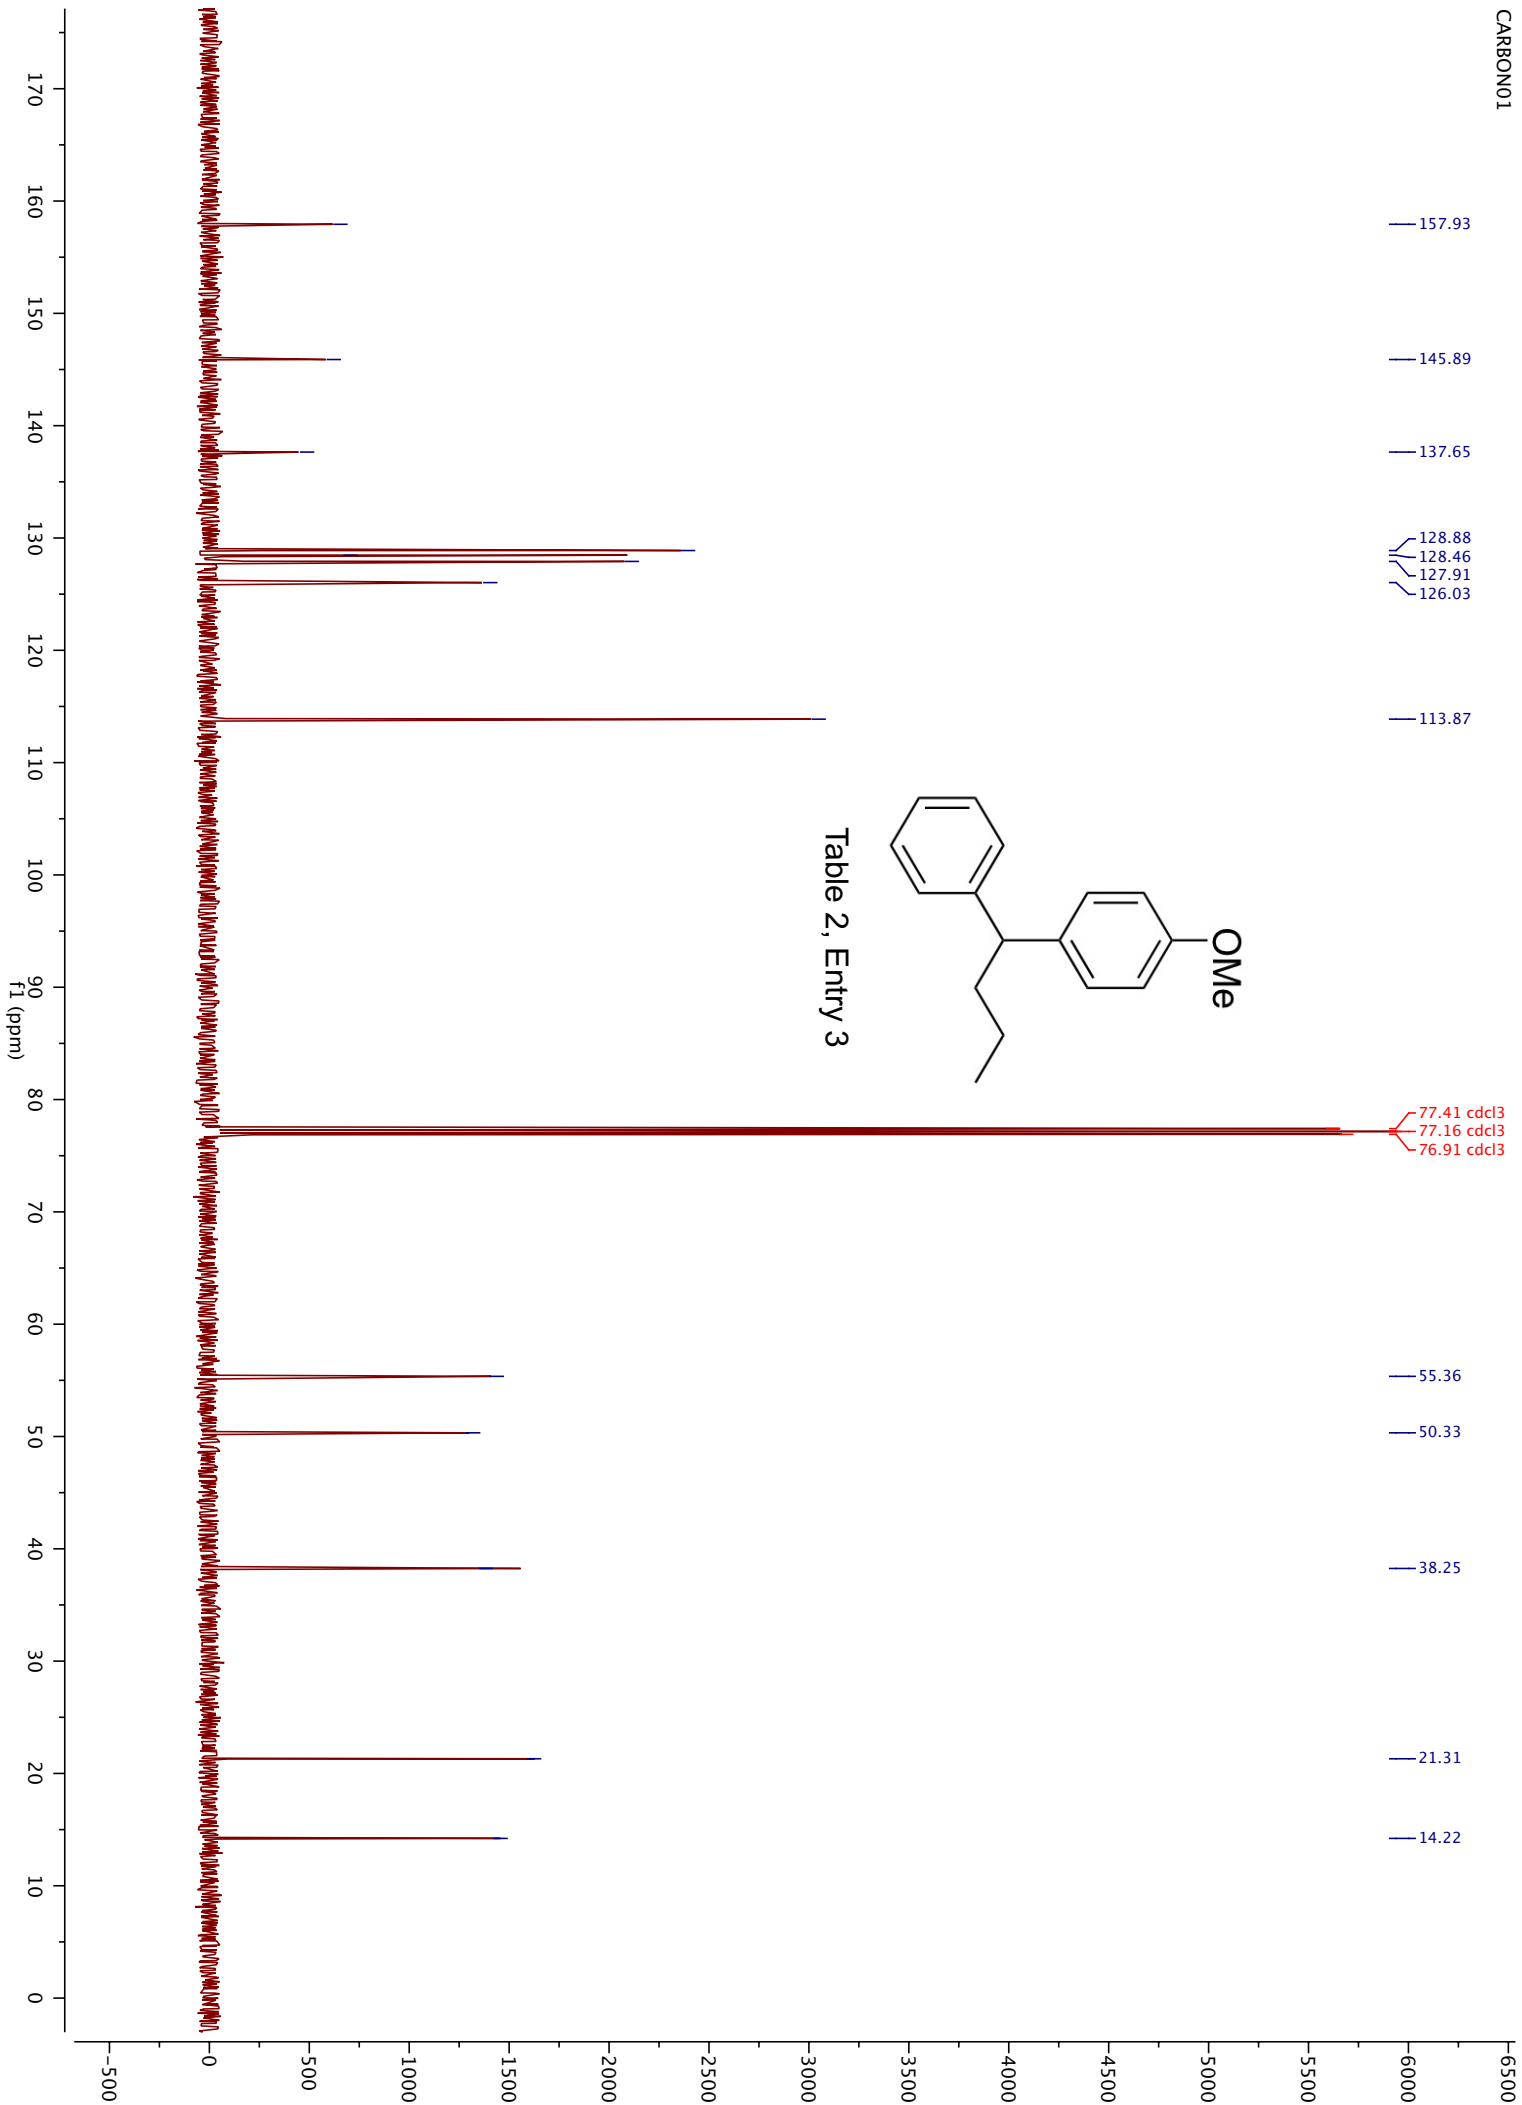

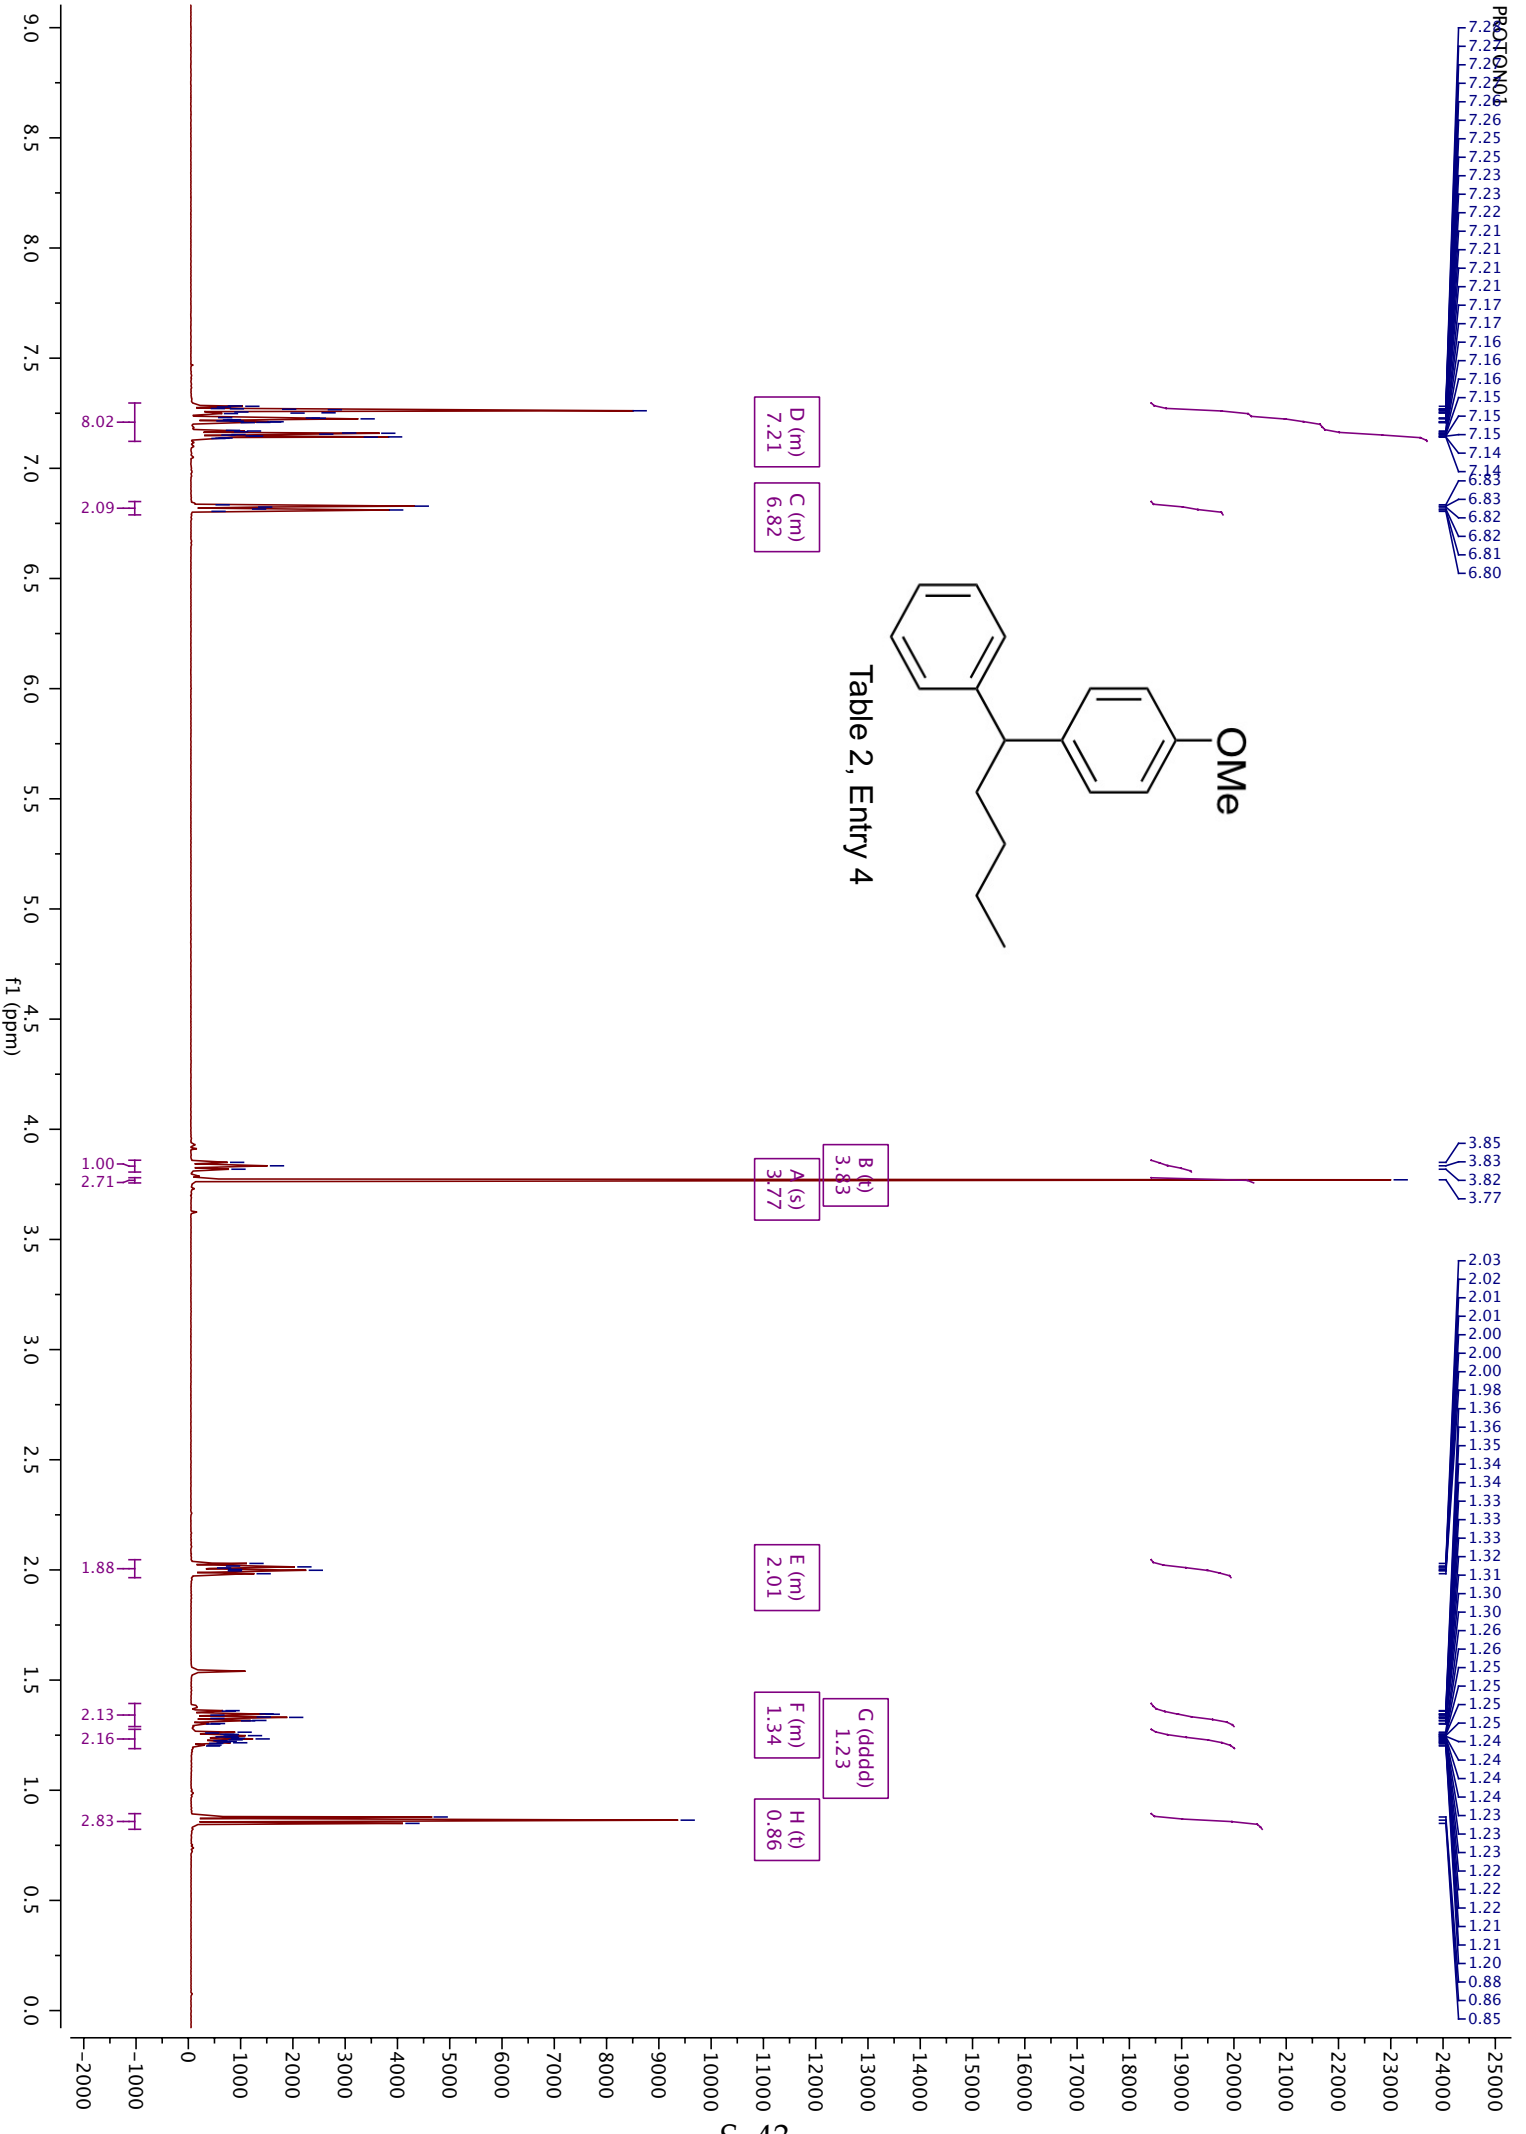

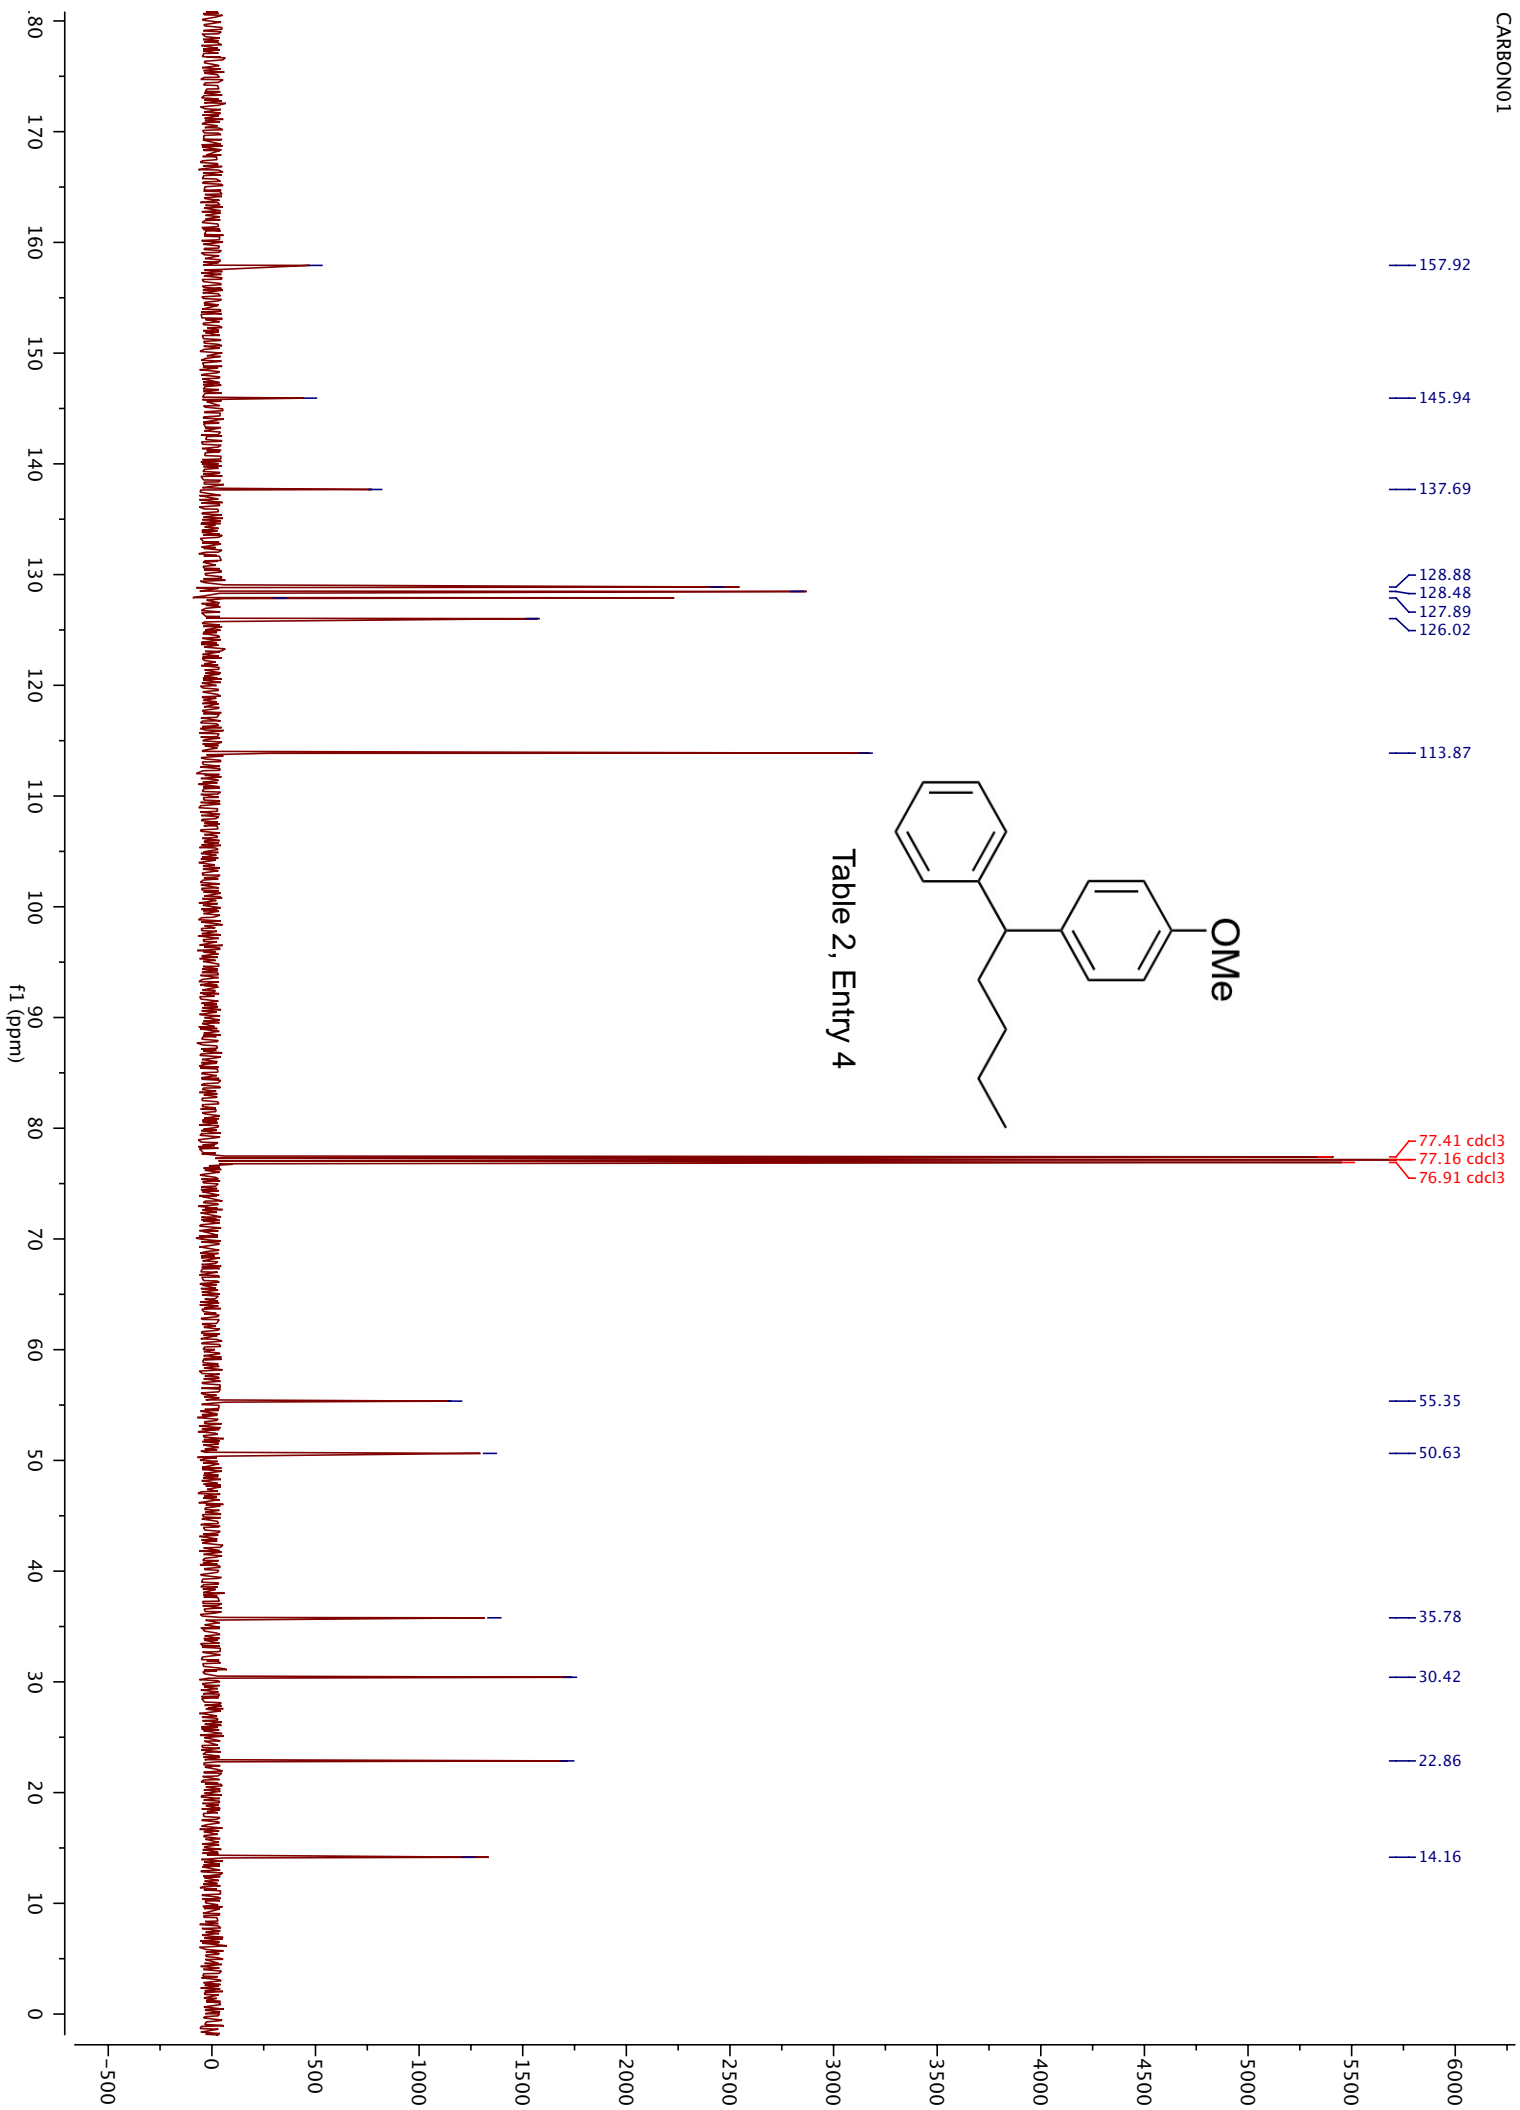

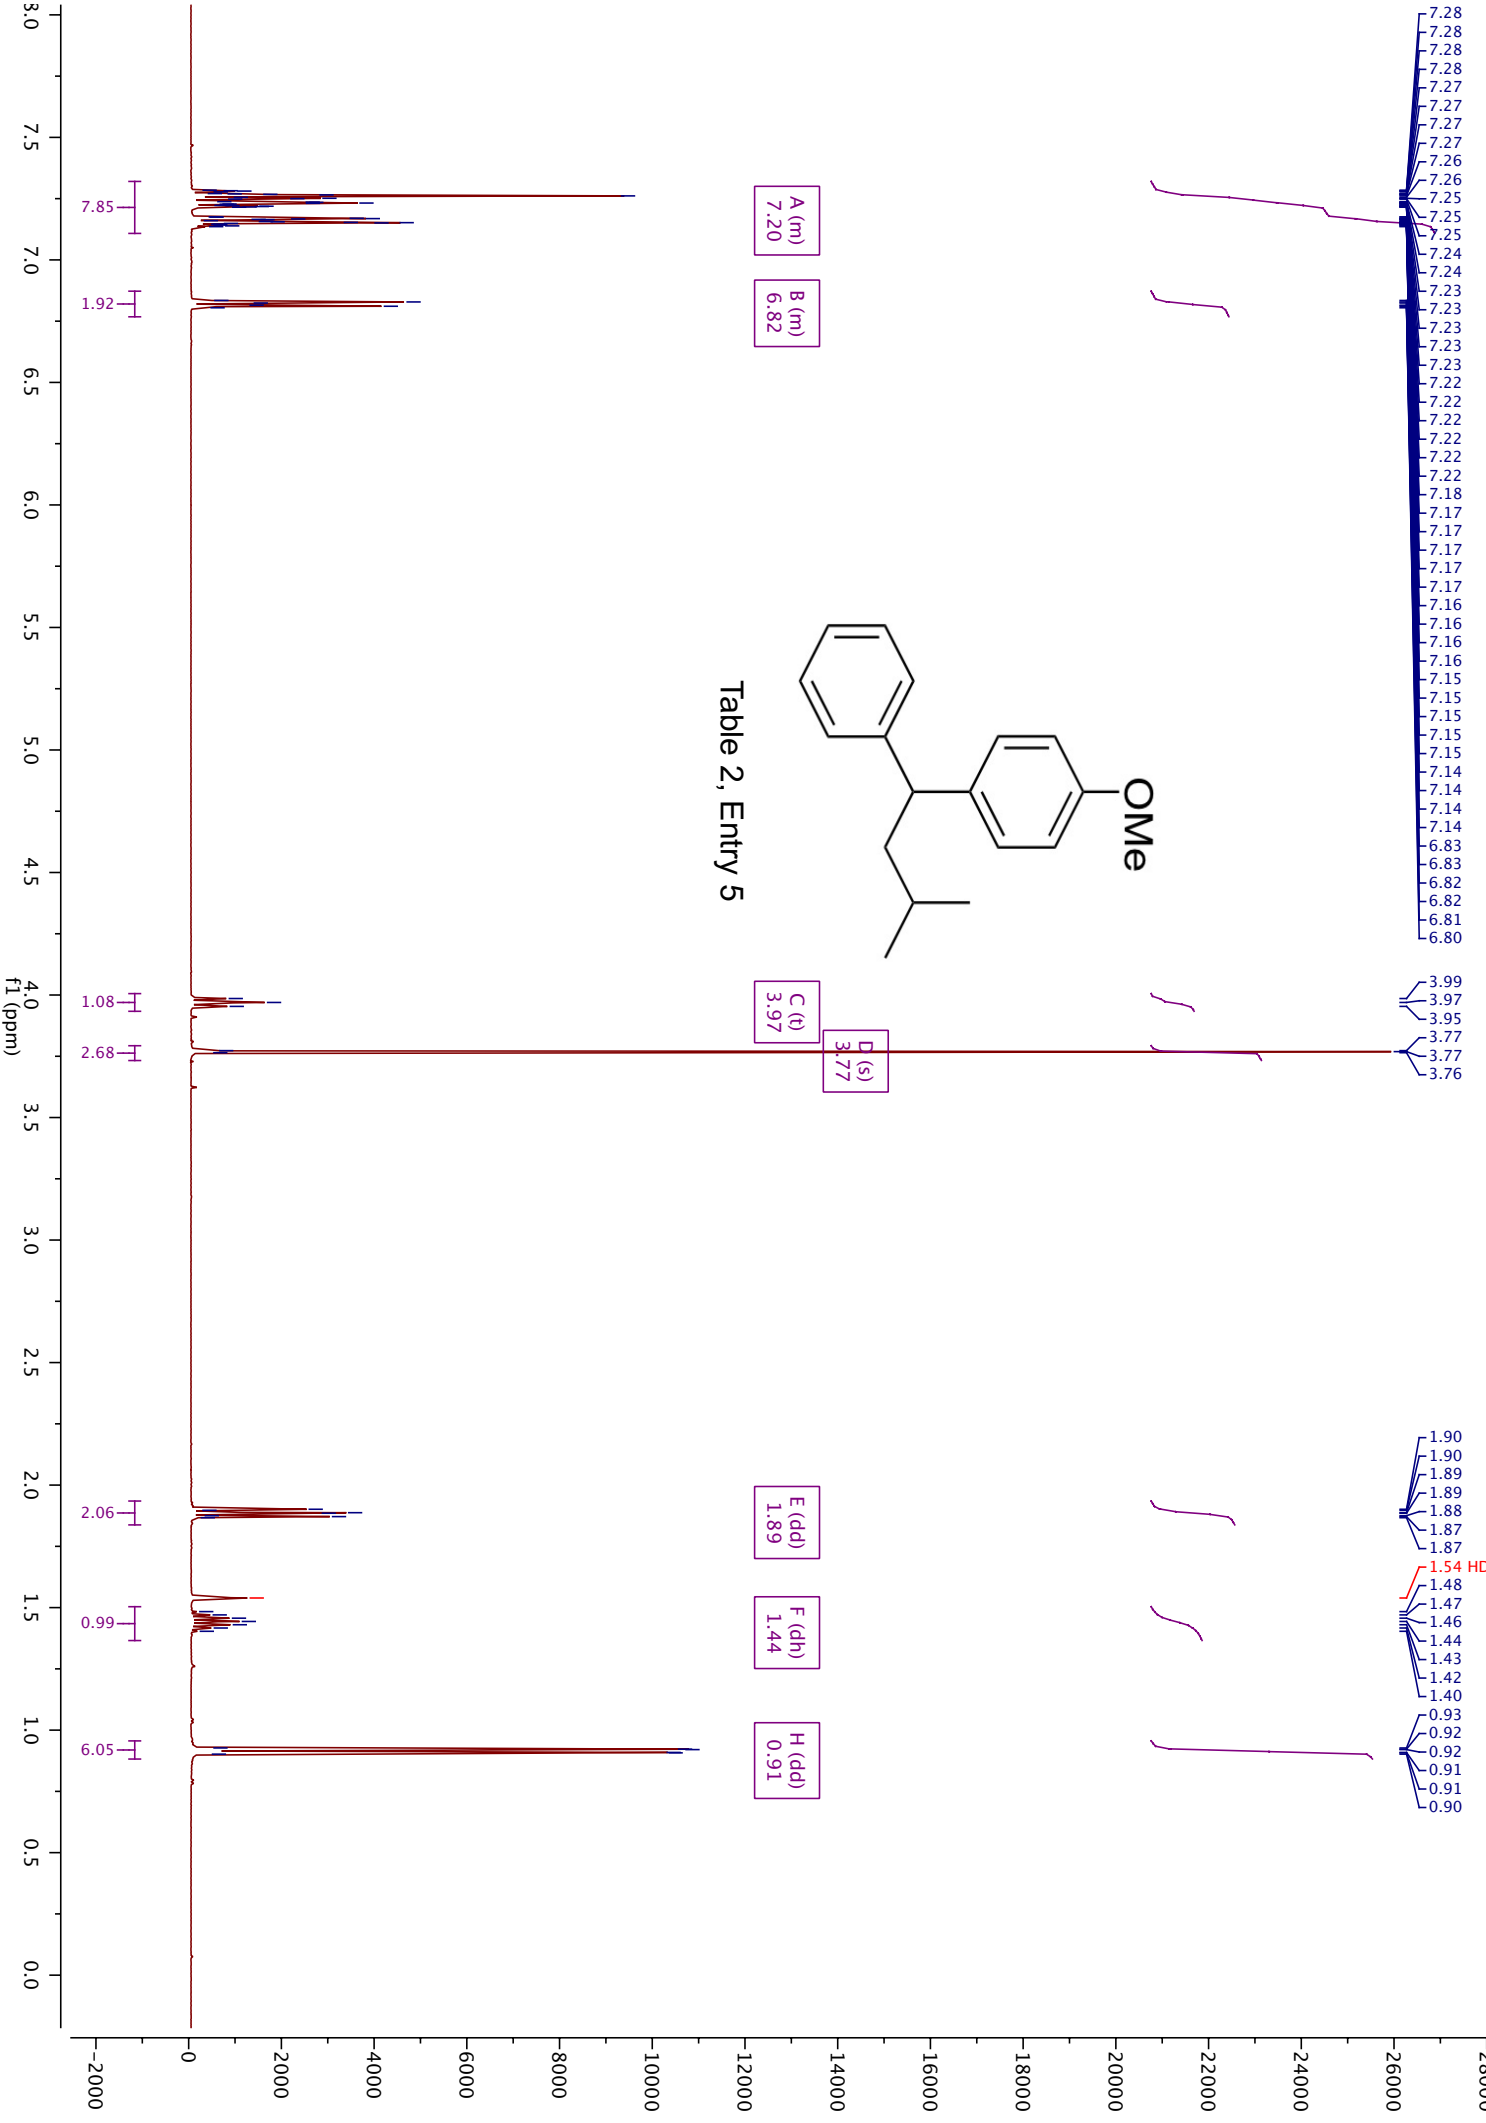

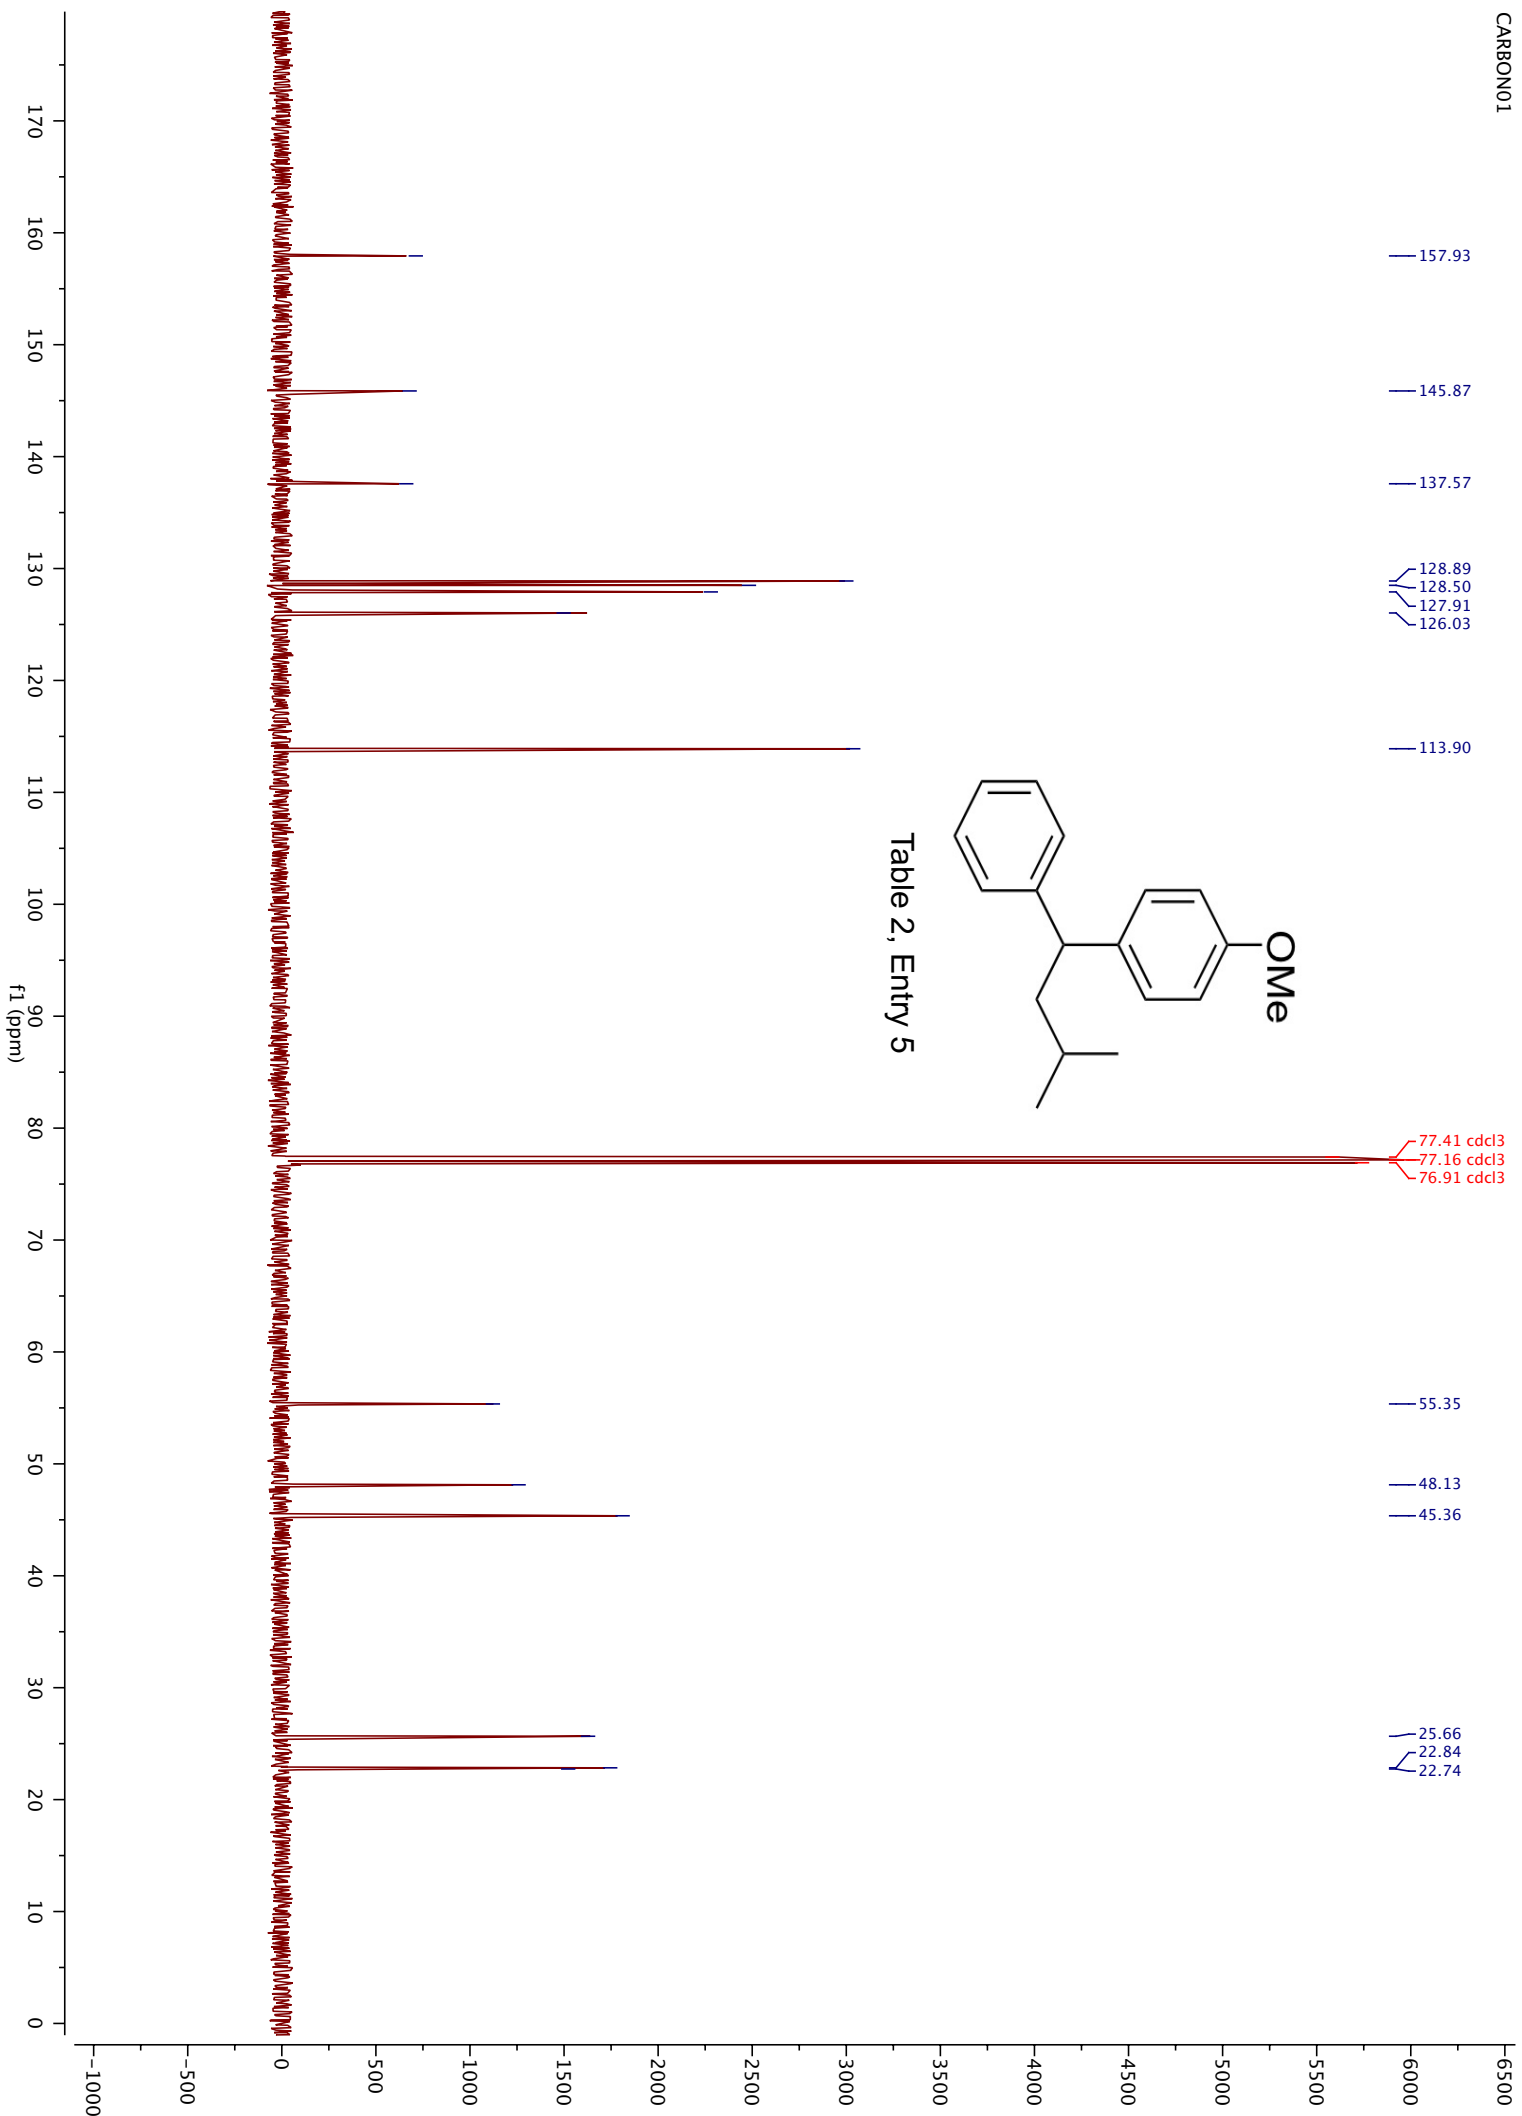

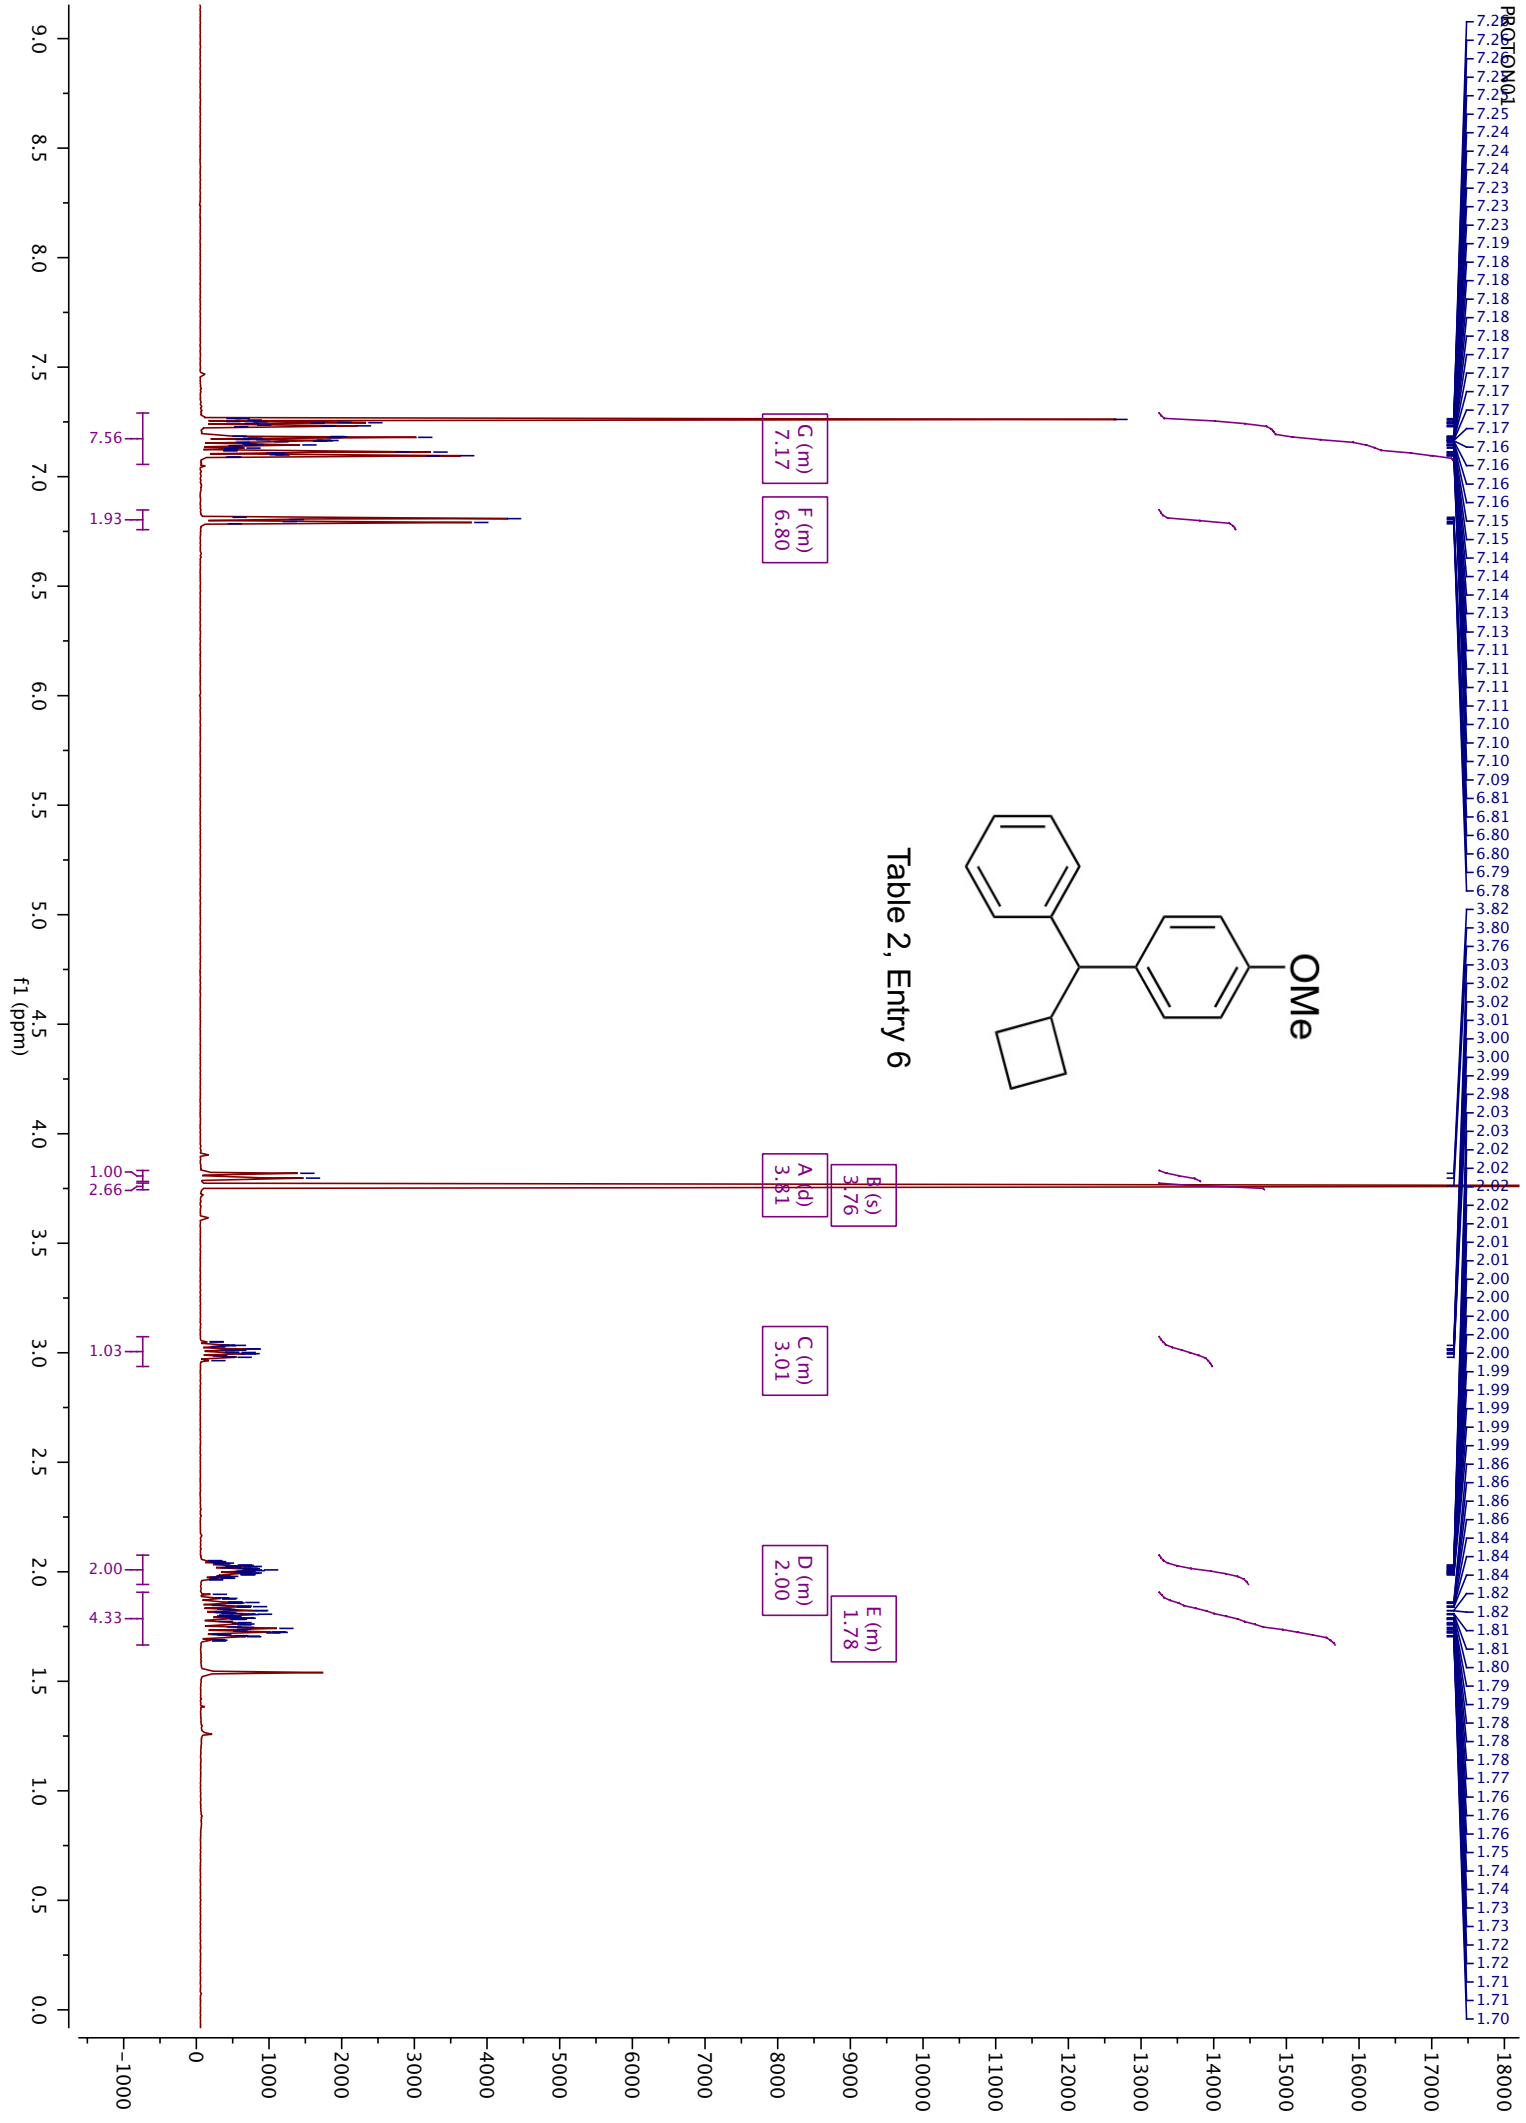

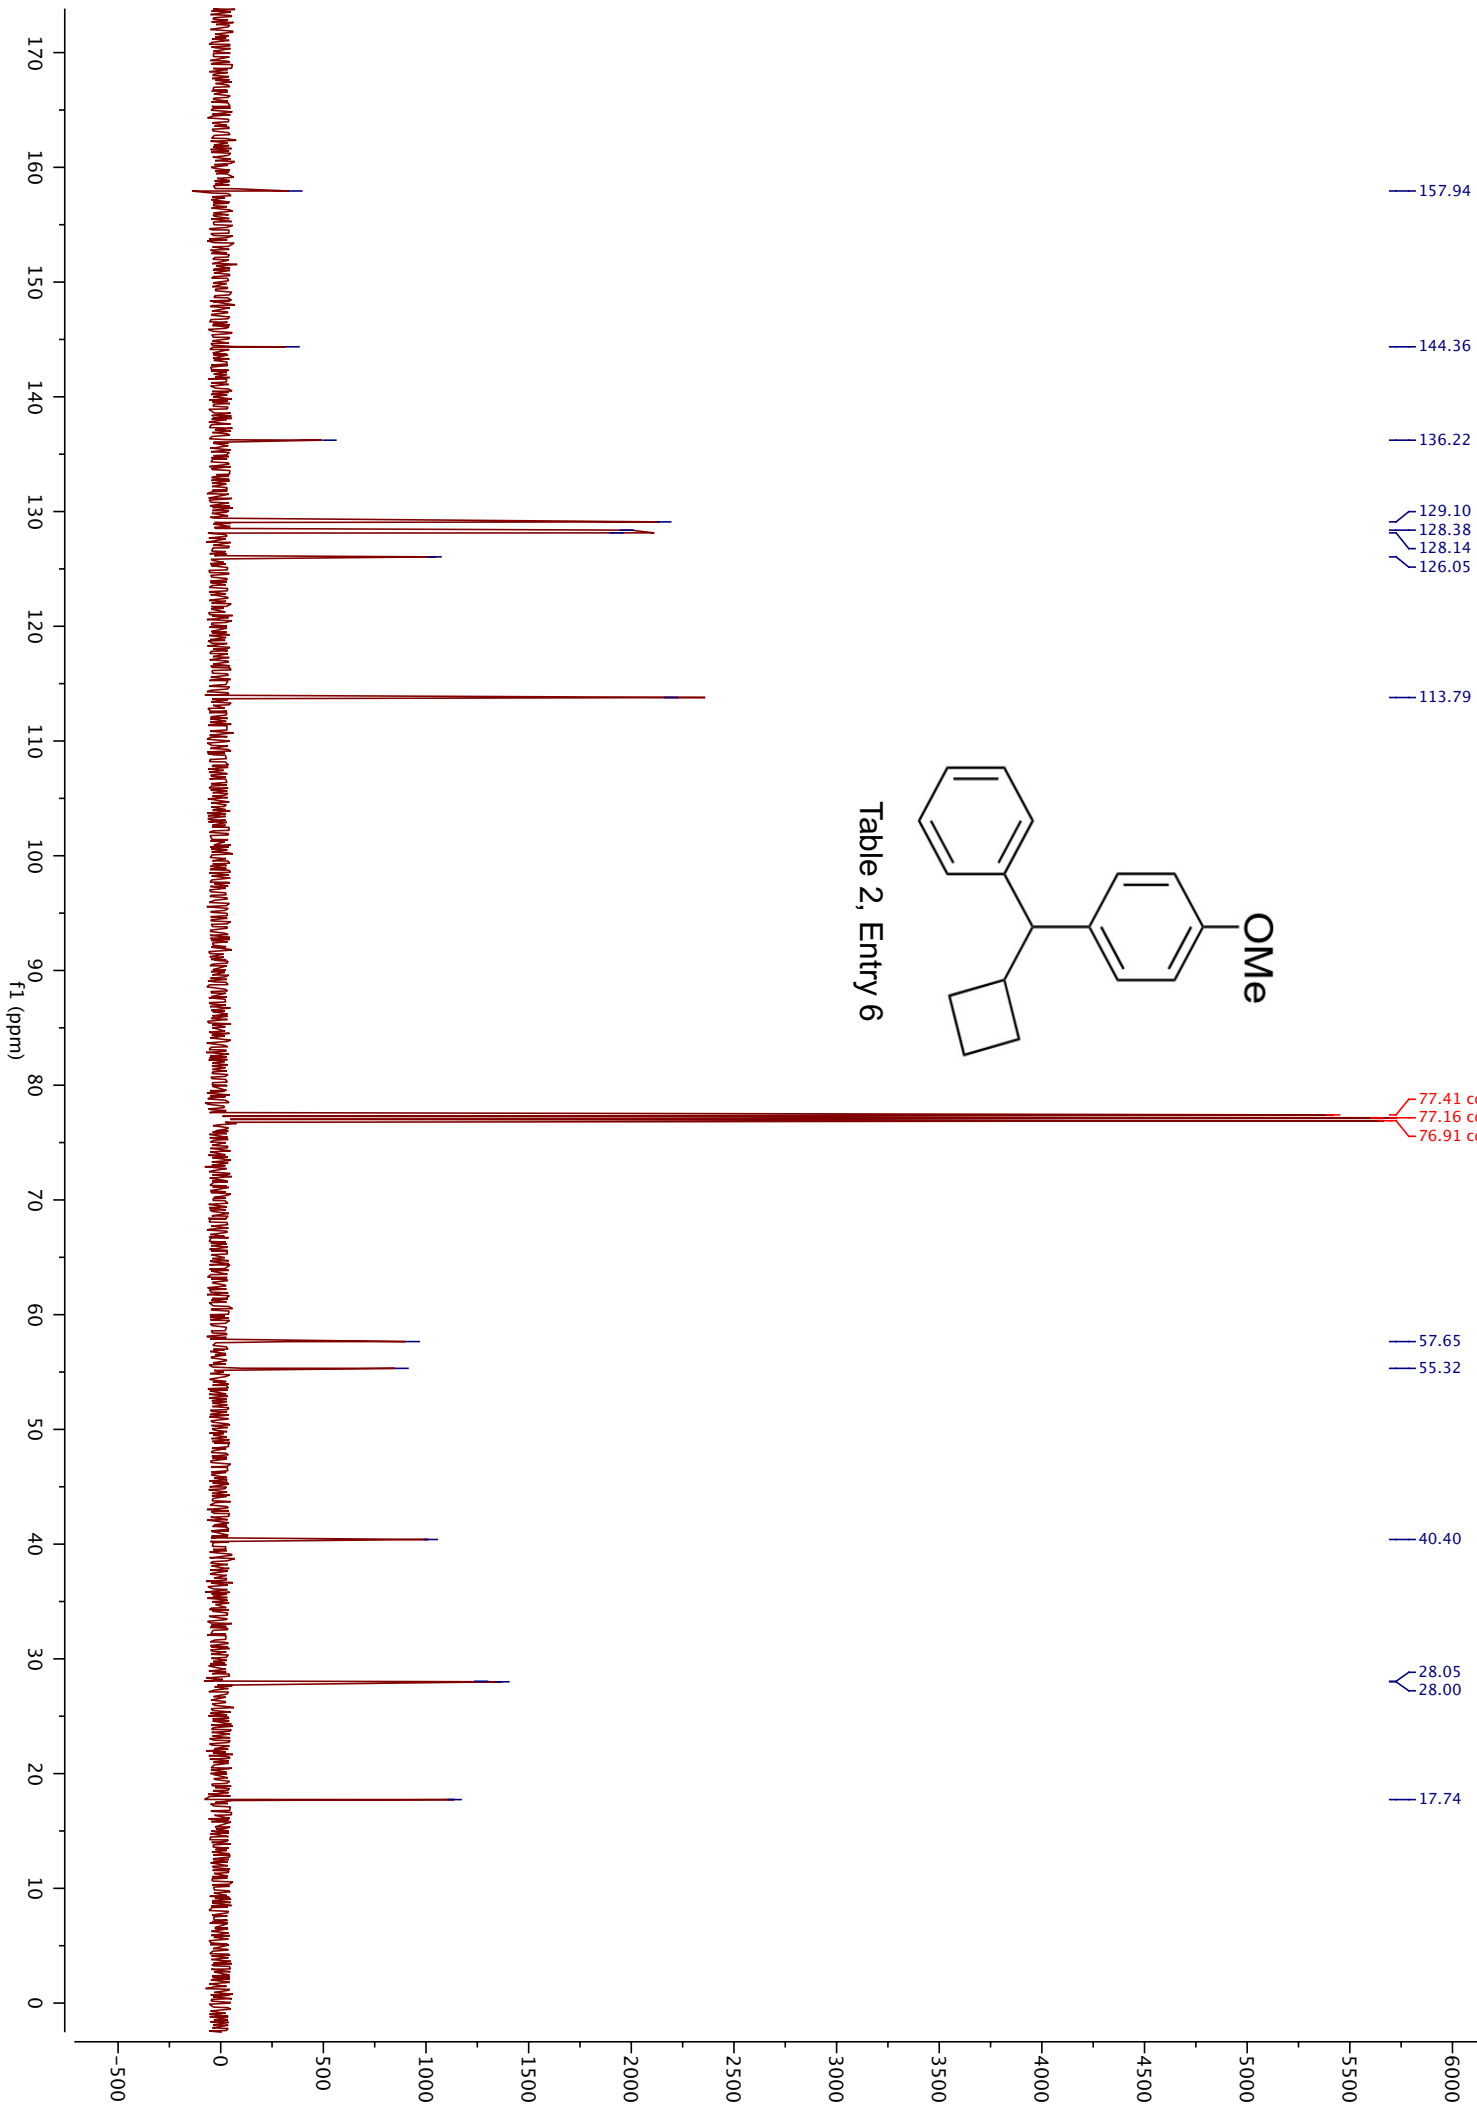



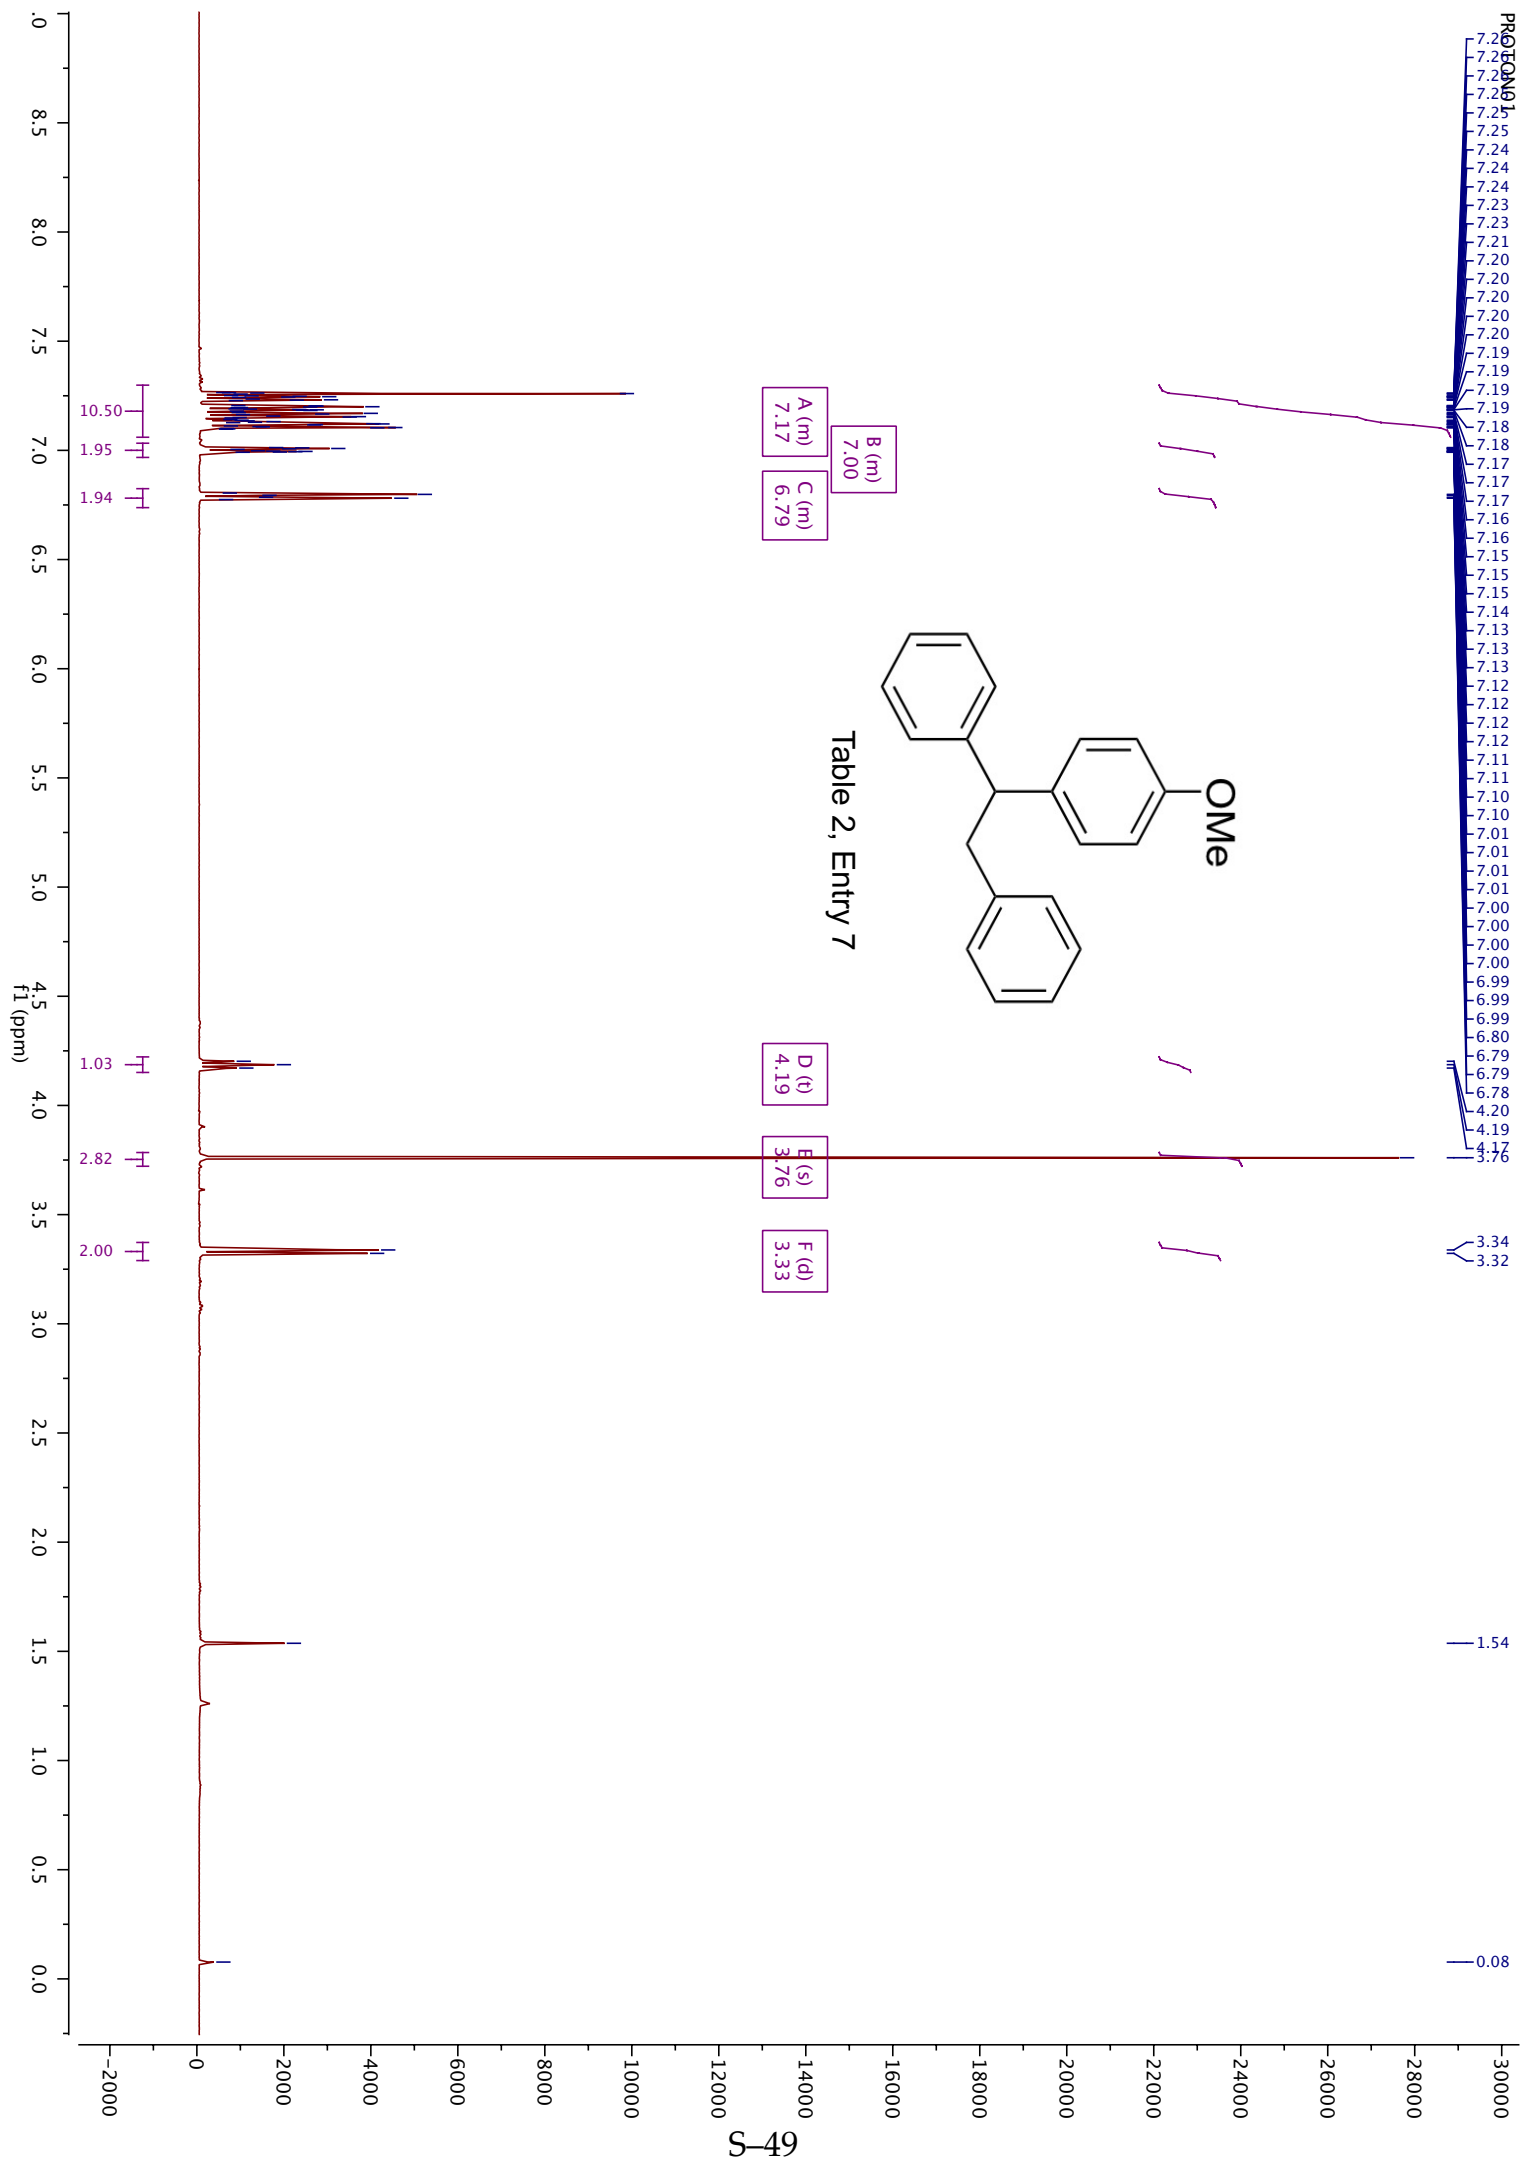

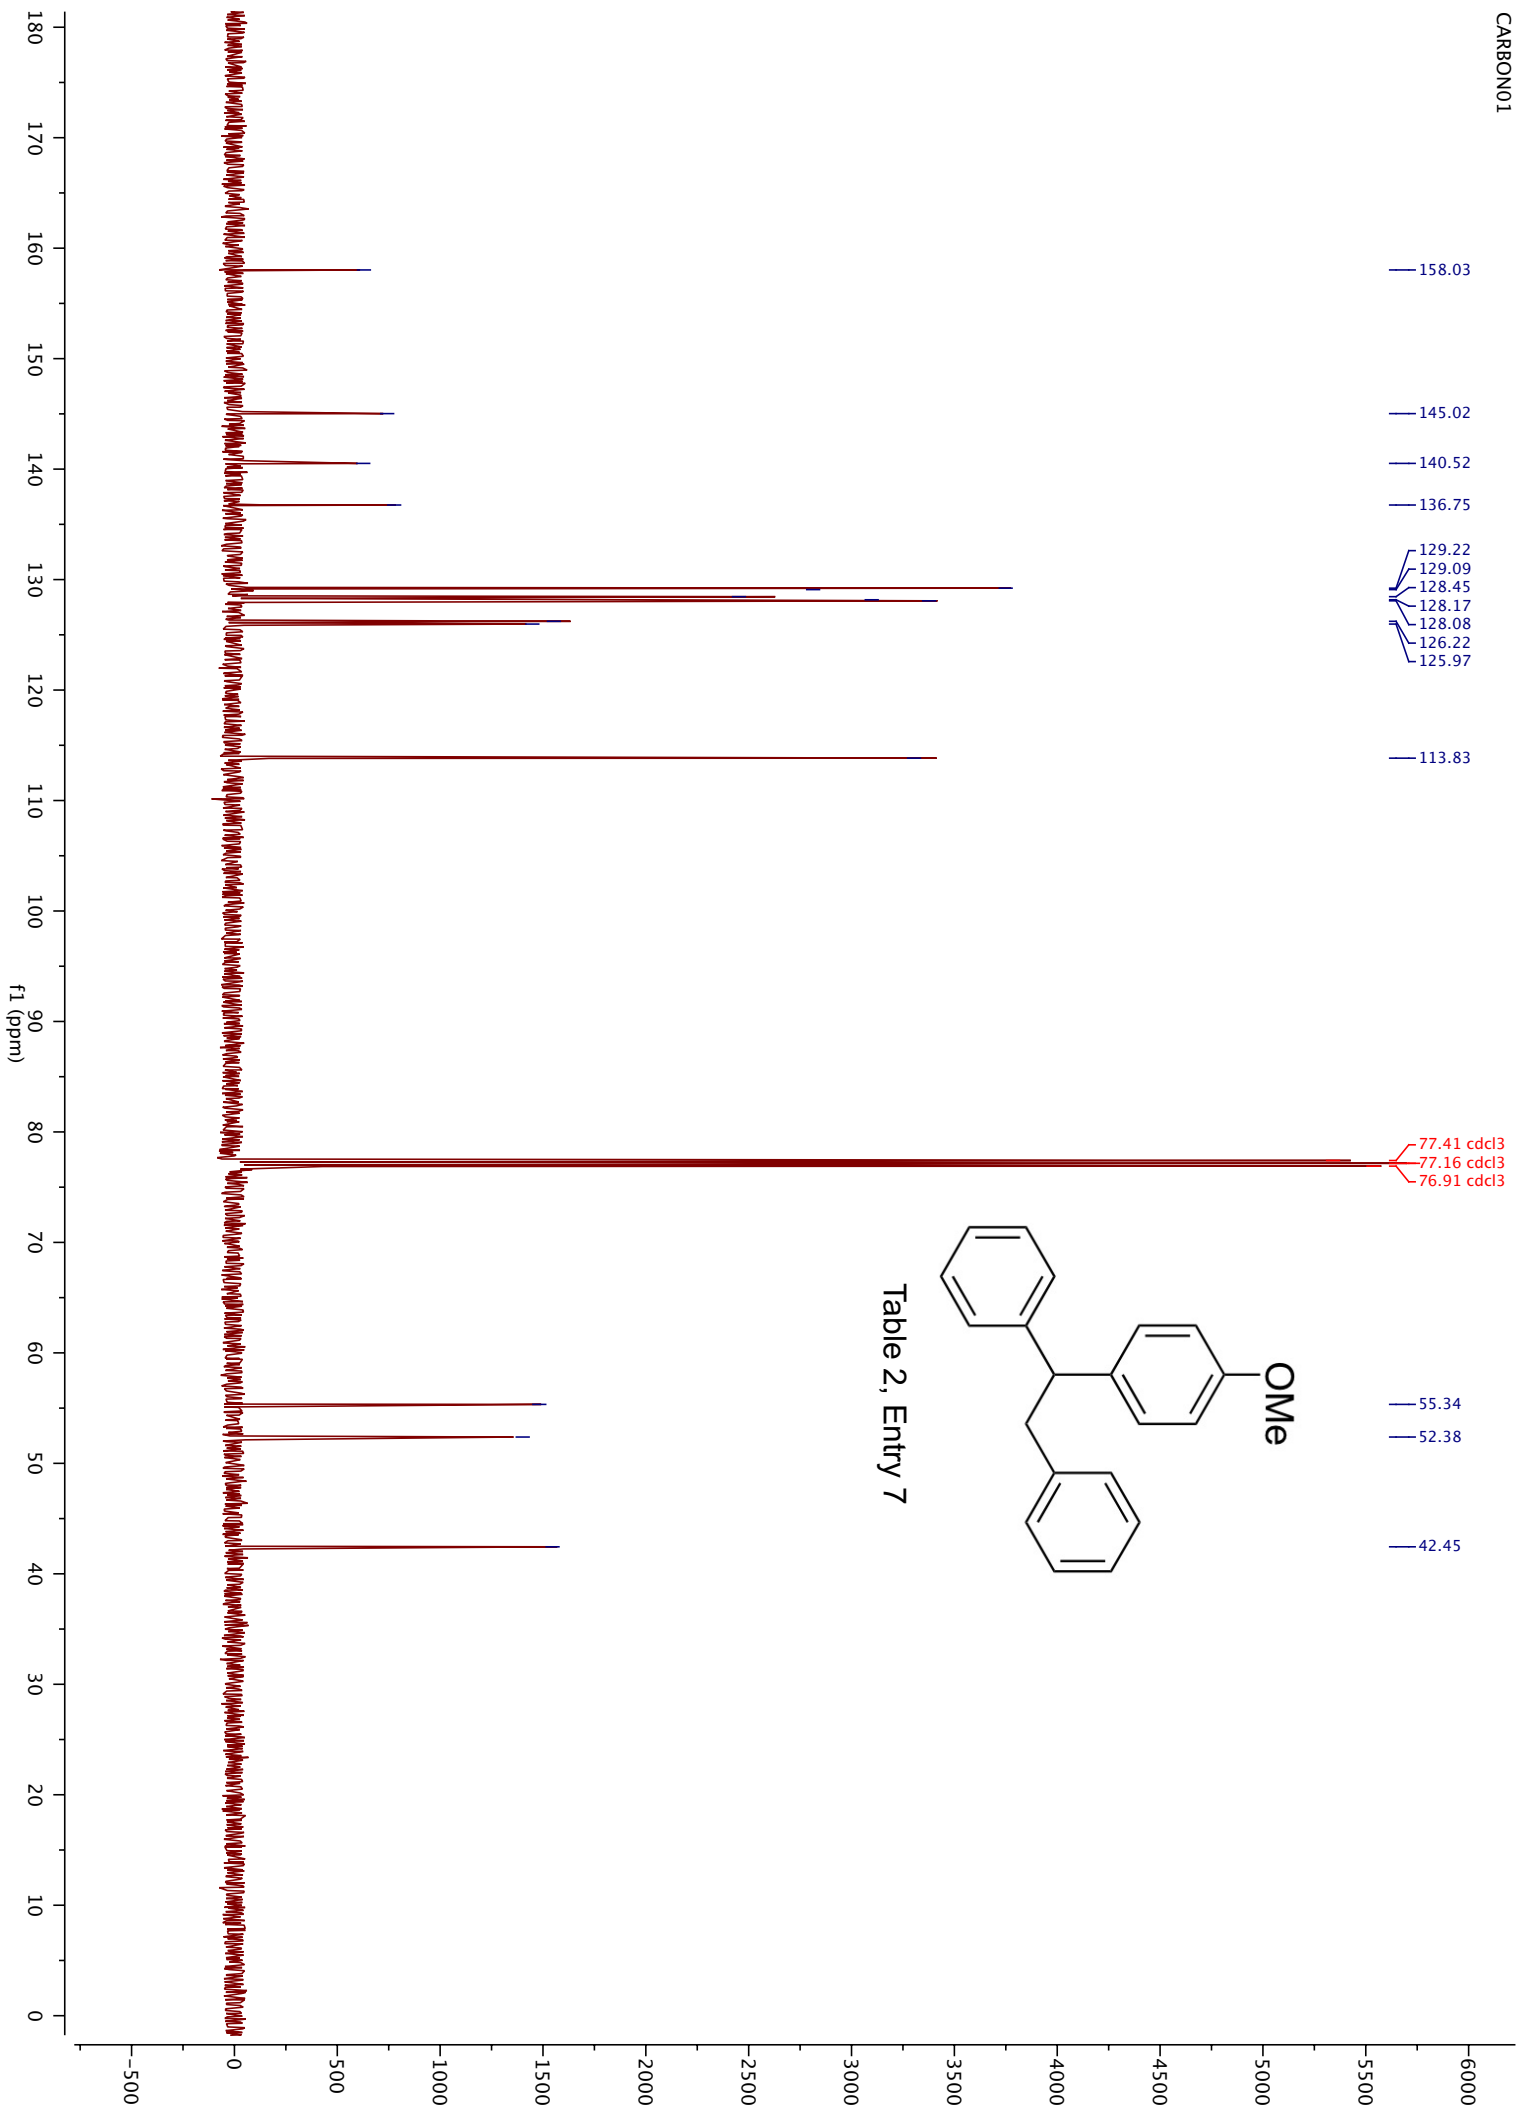

Table 2, Entry 7

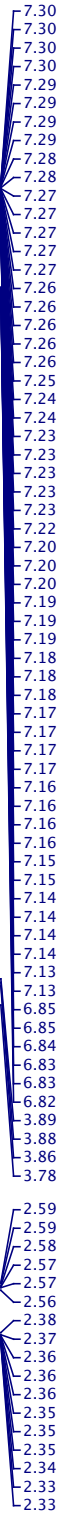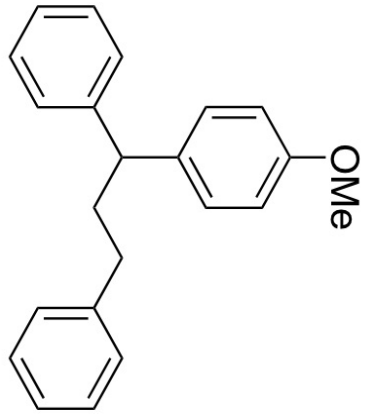

Table 2, Entry 8

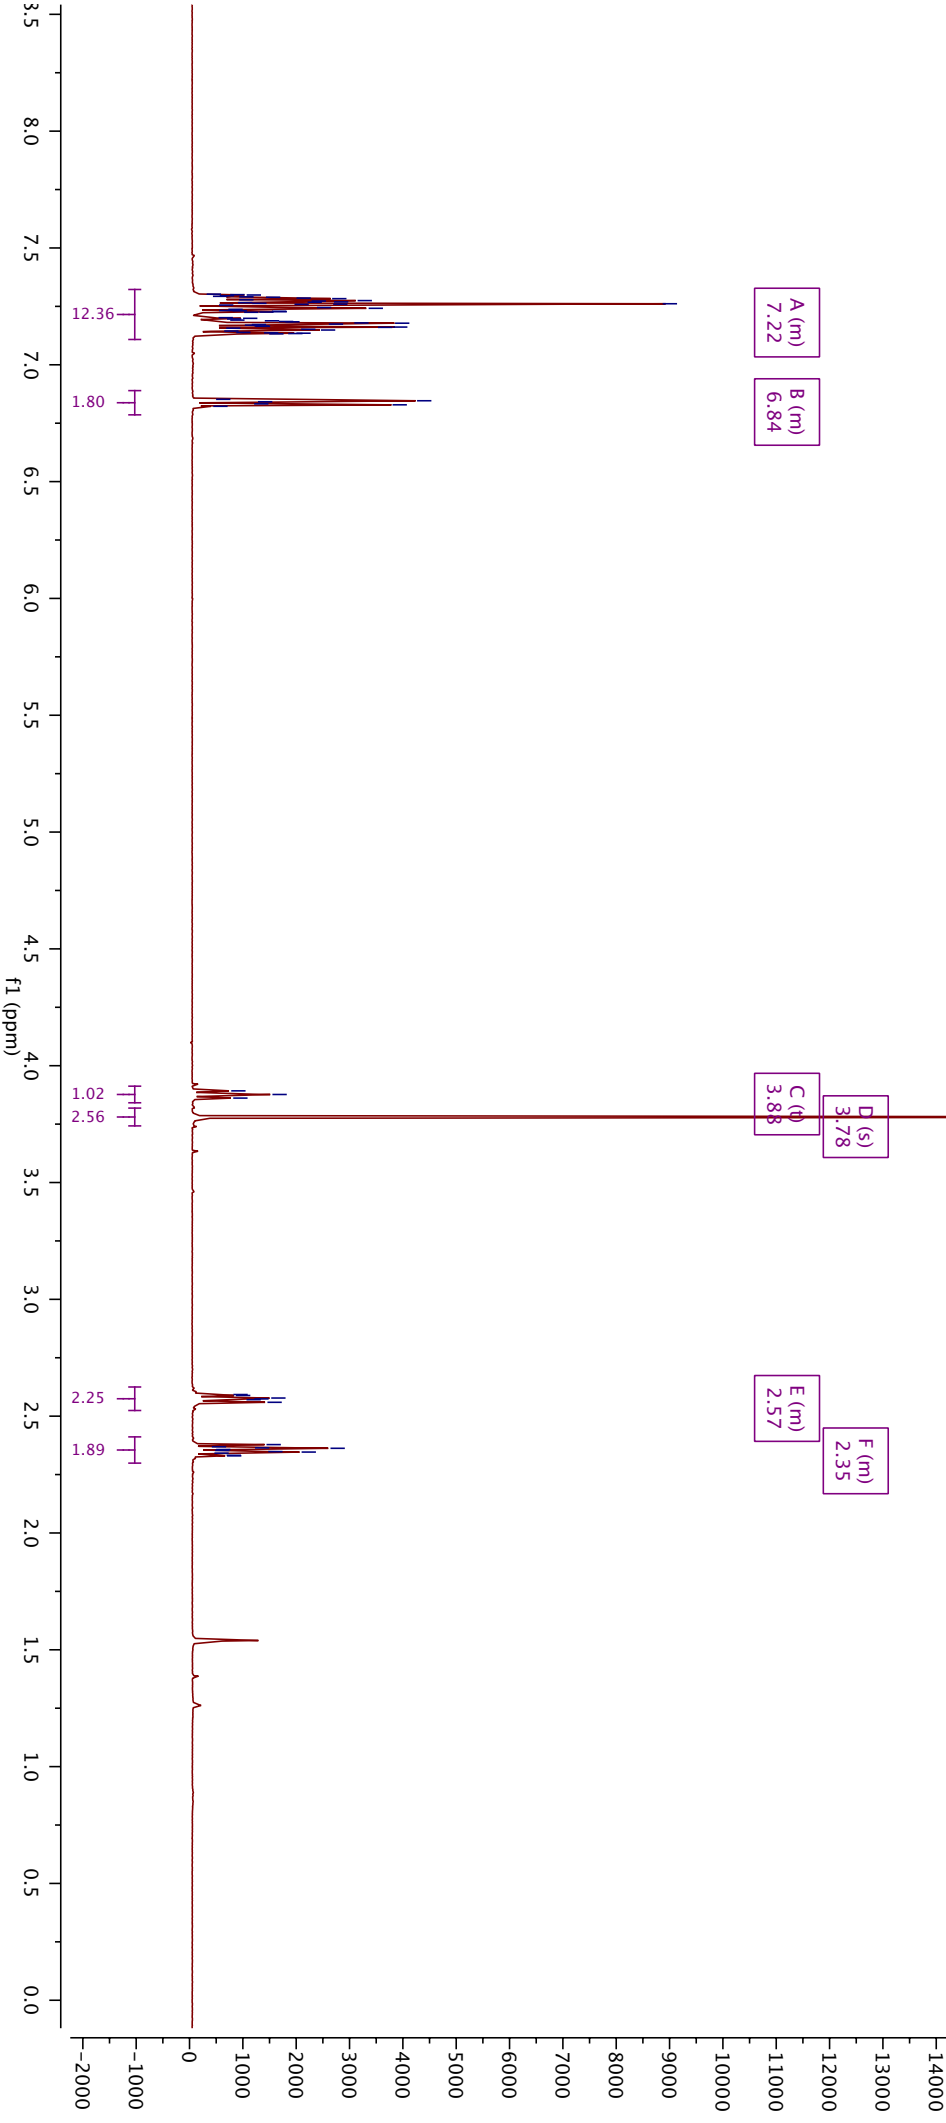

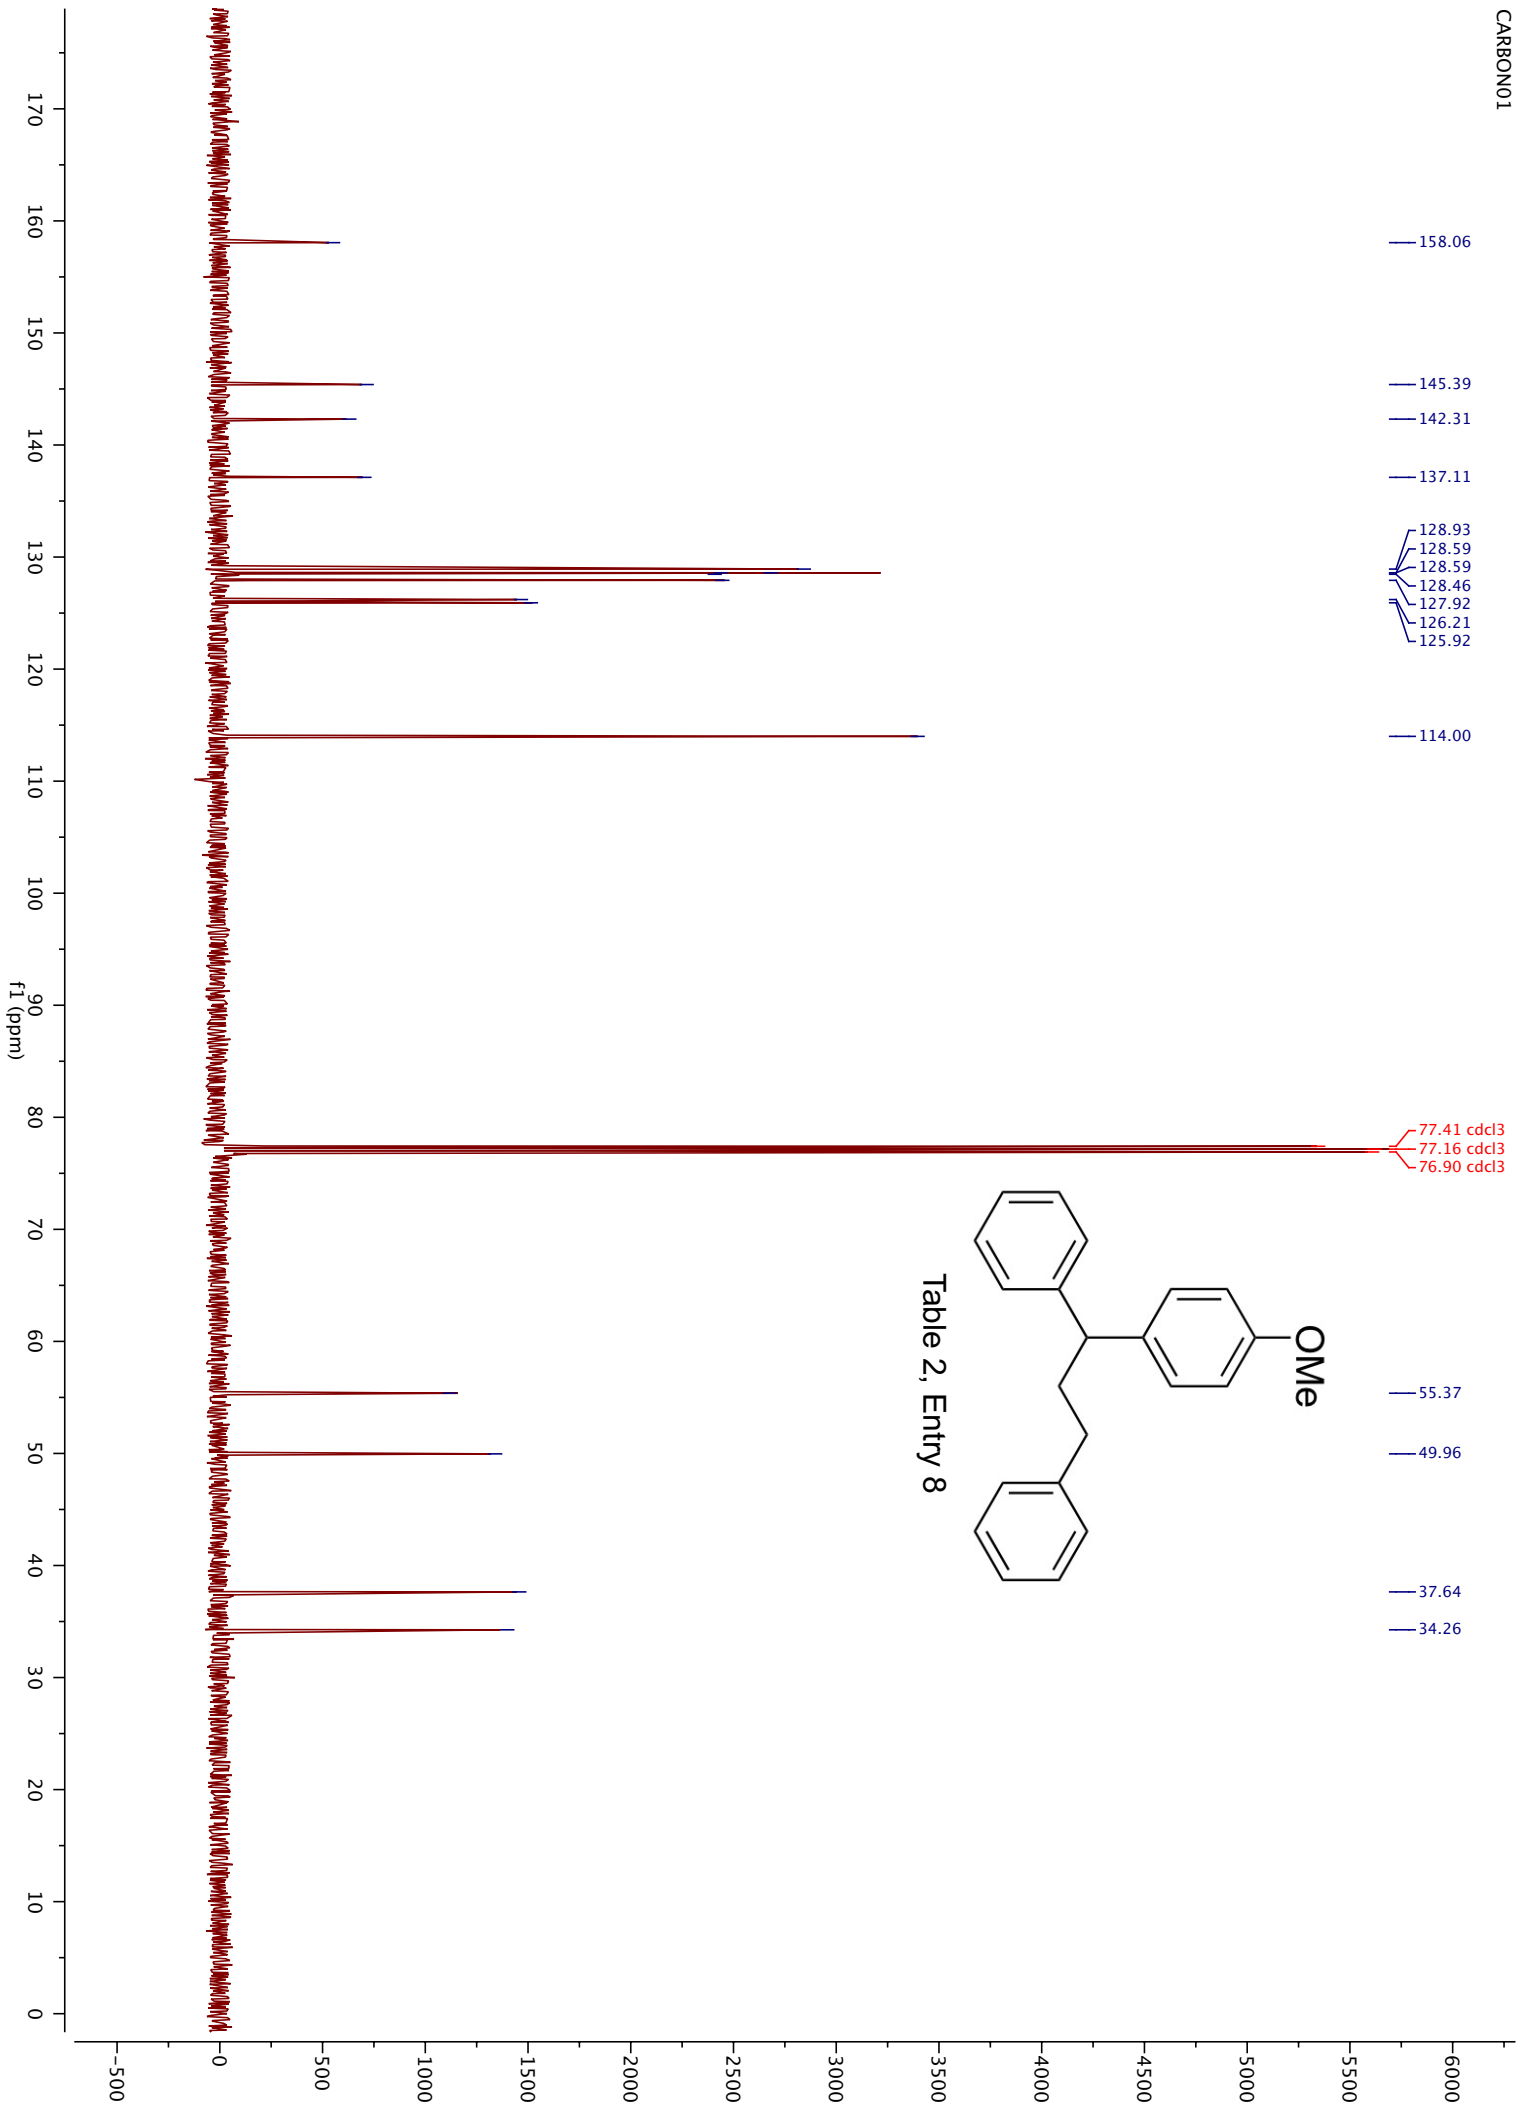

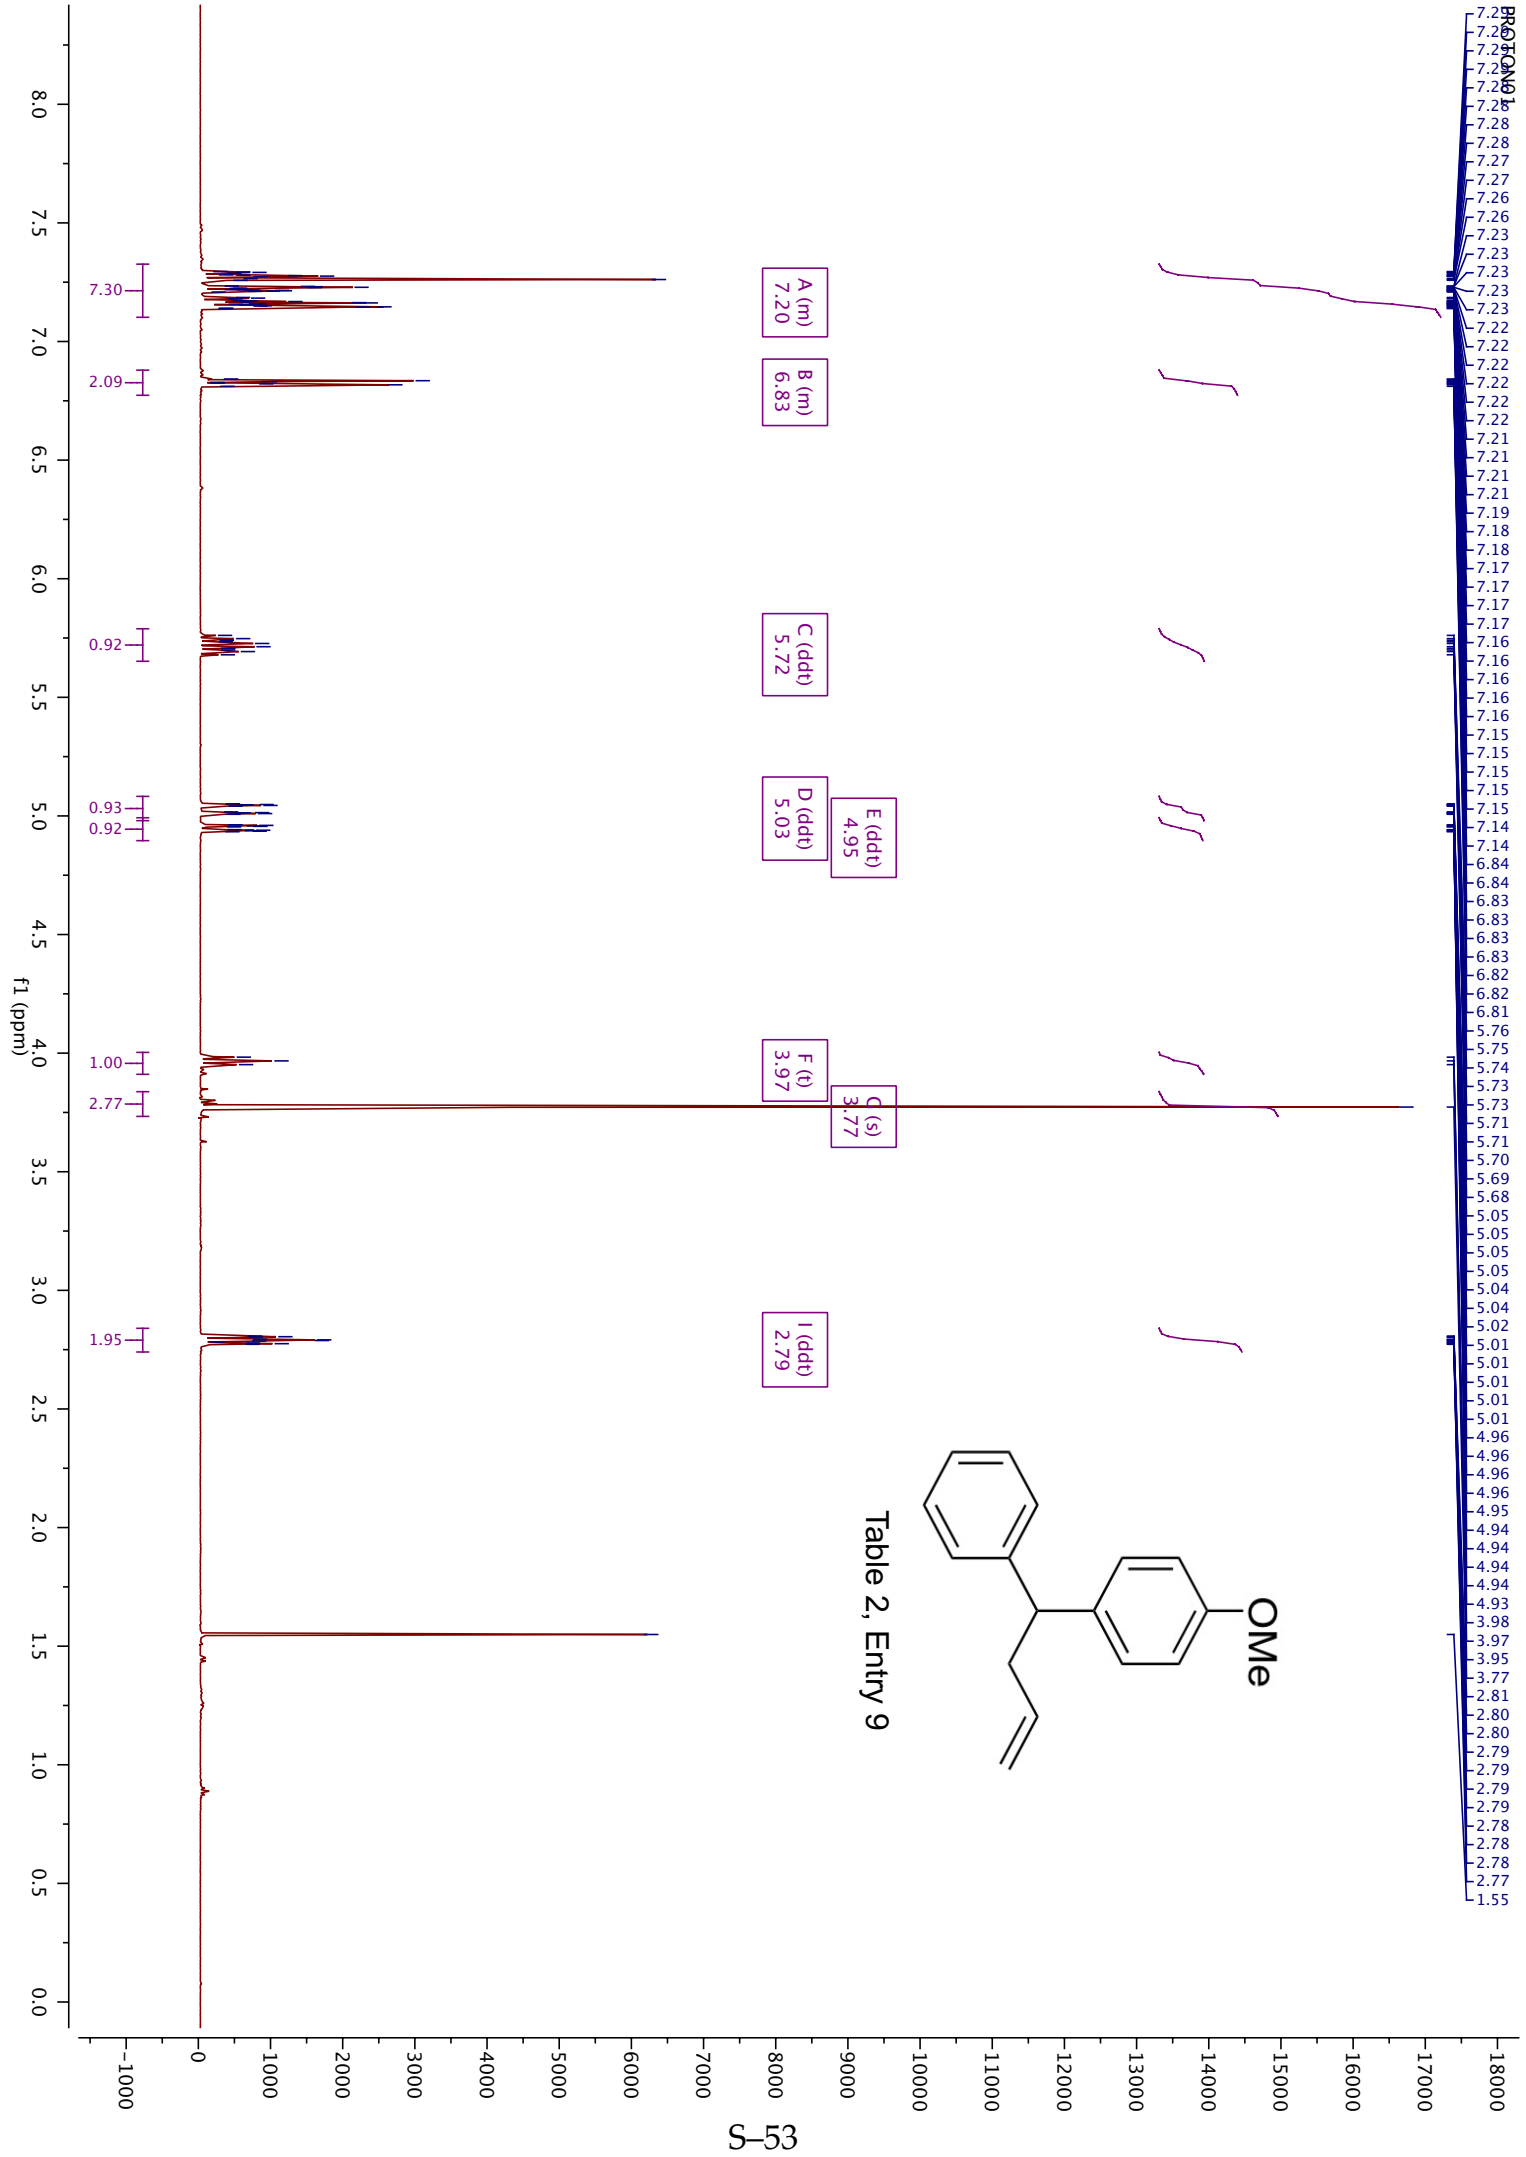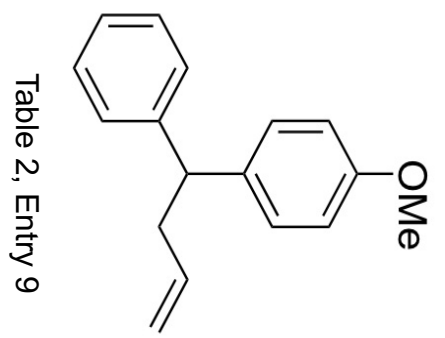

Table 2, Entry 9

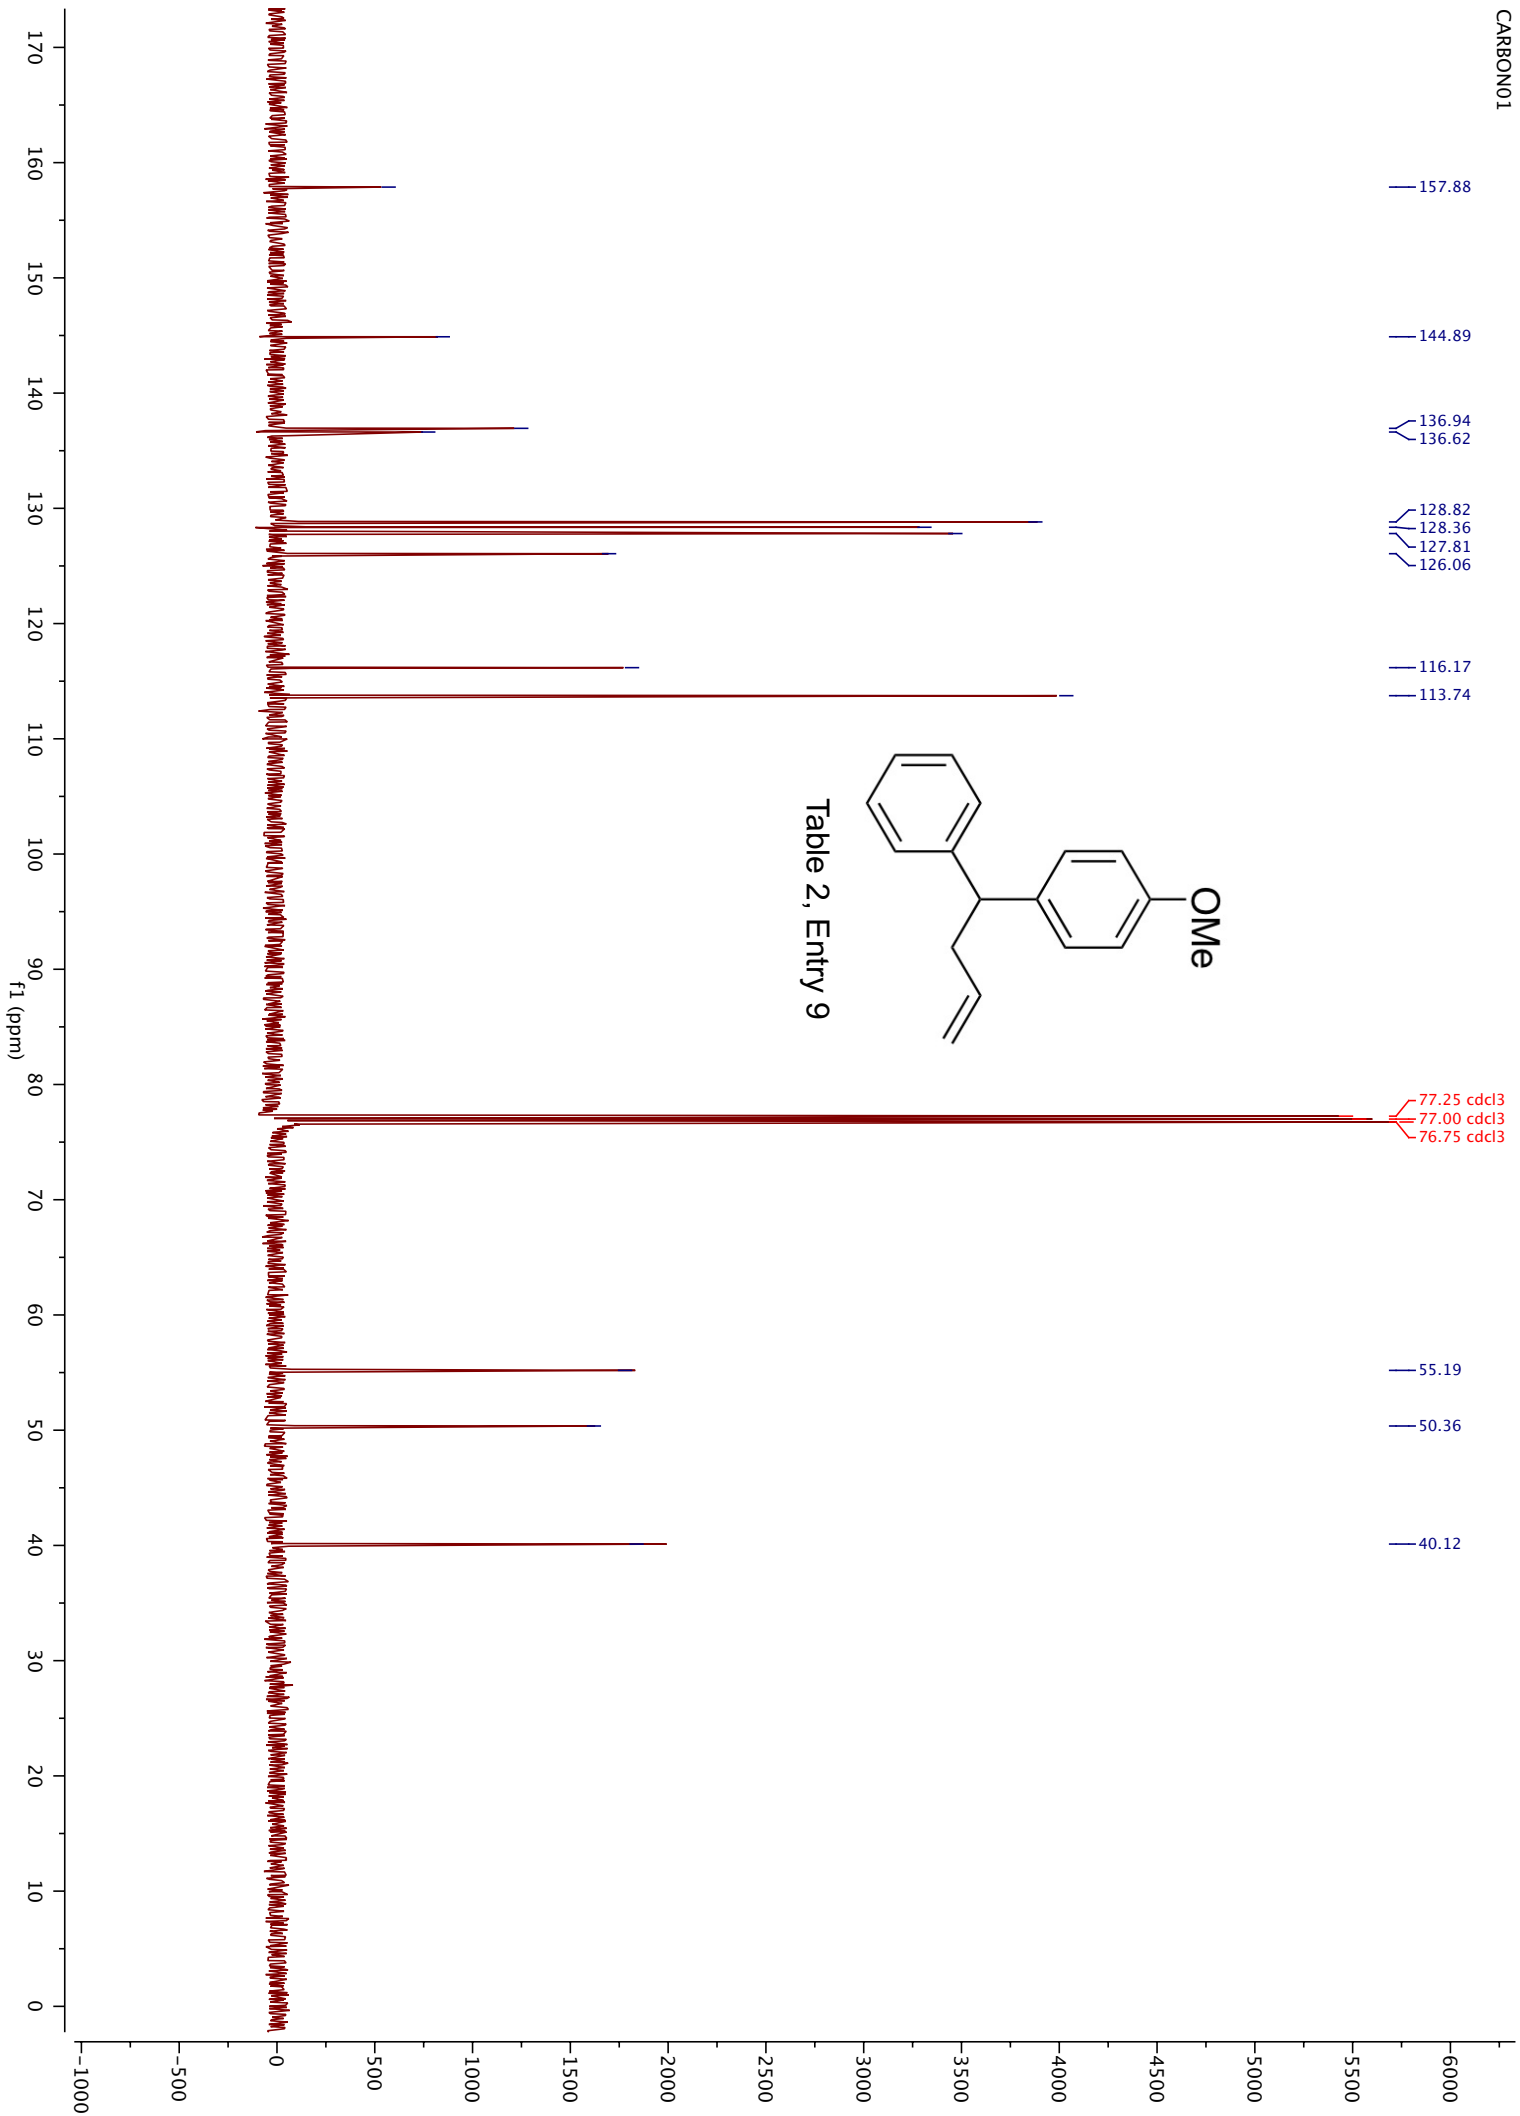

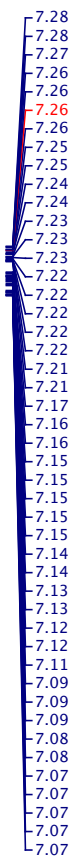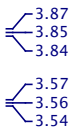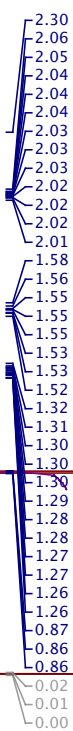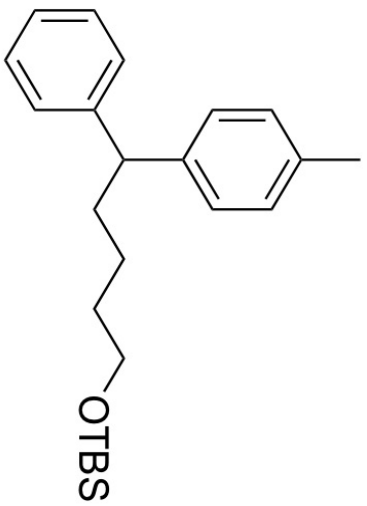

Table 2, Entry 10

A (m)  
7.24

B (m)  
7.11

C (t)  
3.85

D (t)  
3.56

E (s)  
2.30

F (m)  
2.03

G (m)  
1.55

H (m)  
1.29

I (s)  
0.86

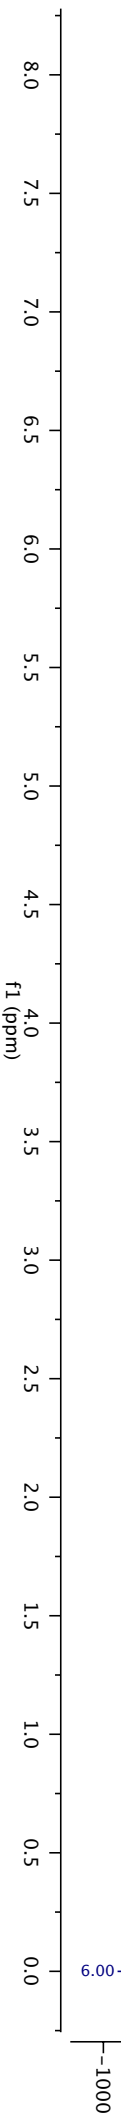

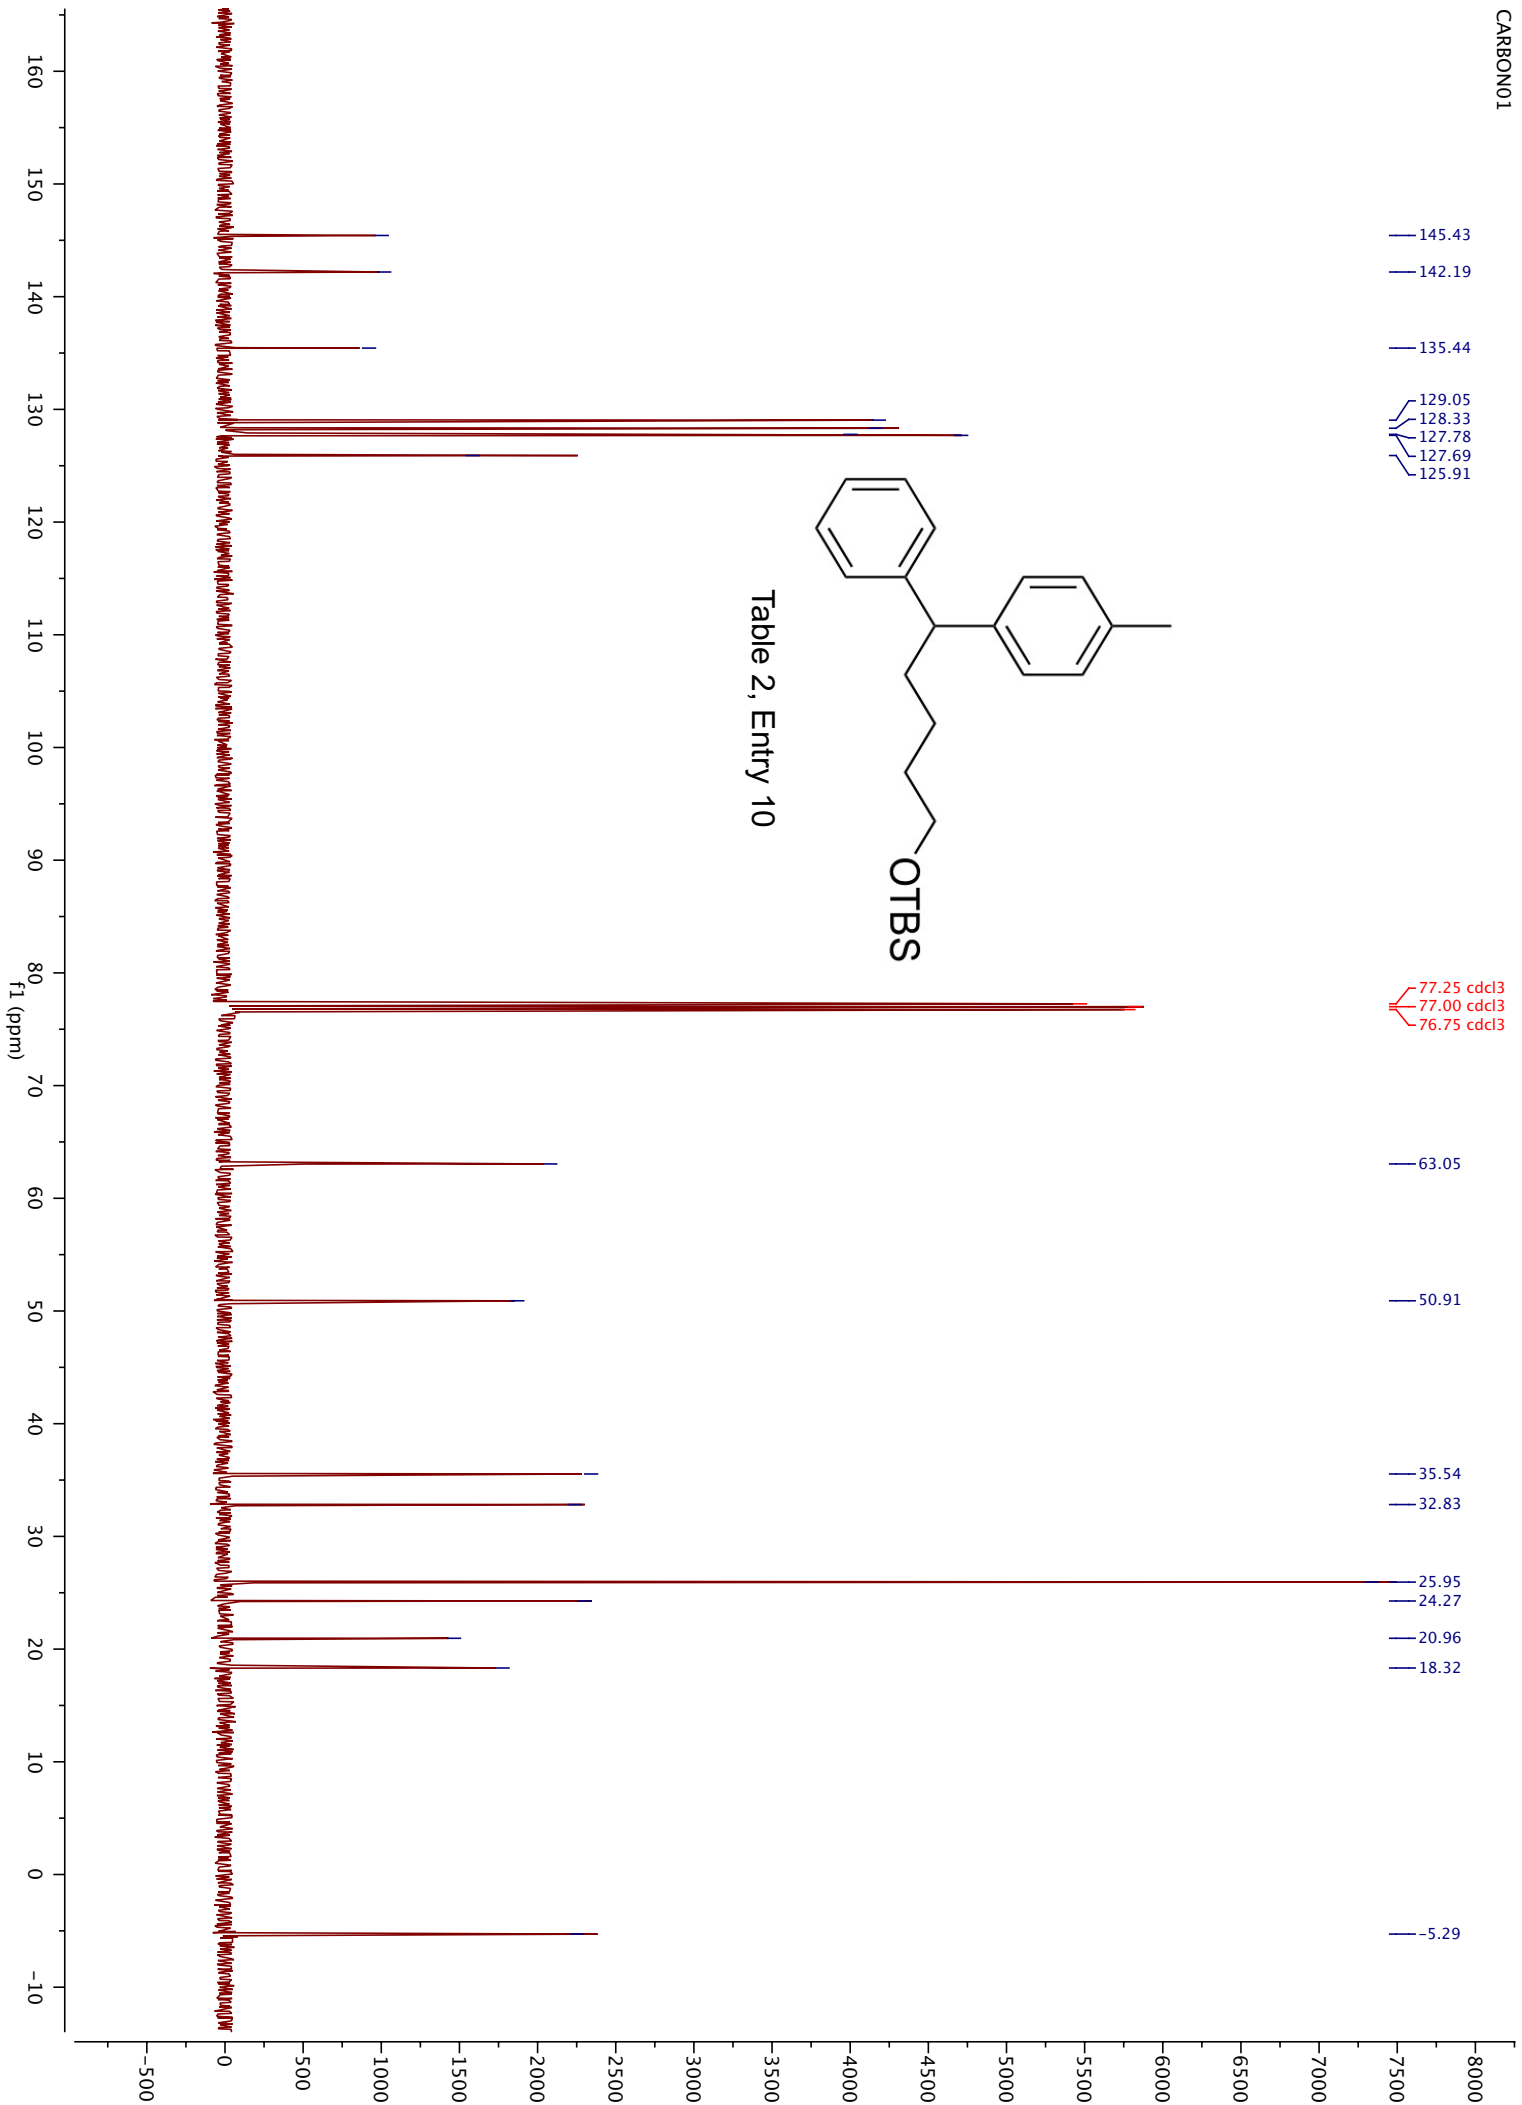



PROTON 1

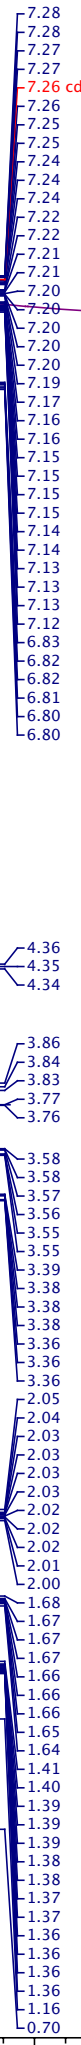

Table 2, Entry 11

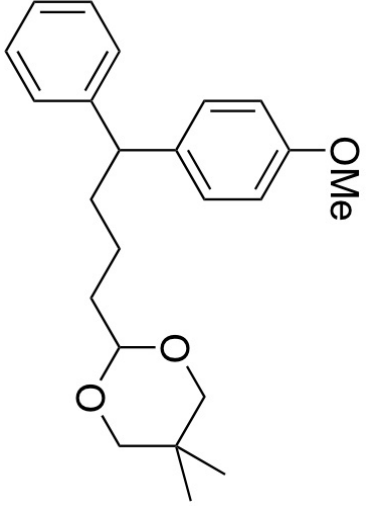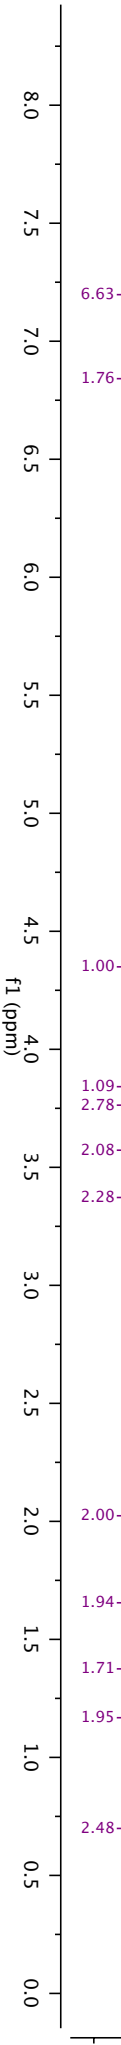

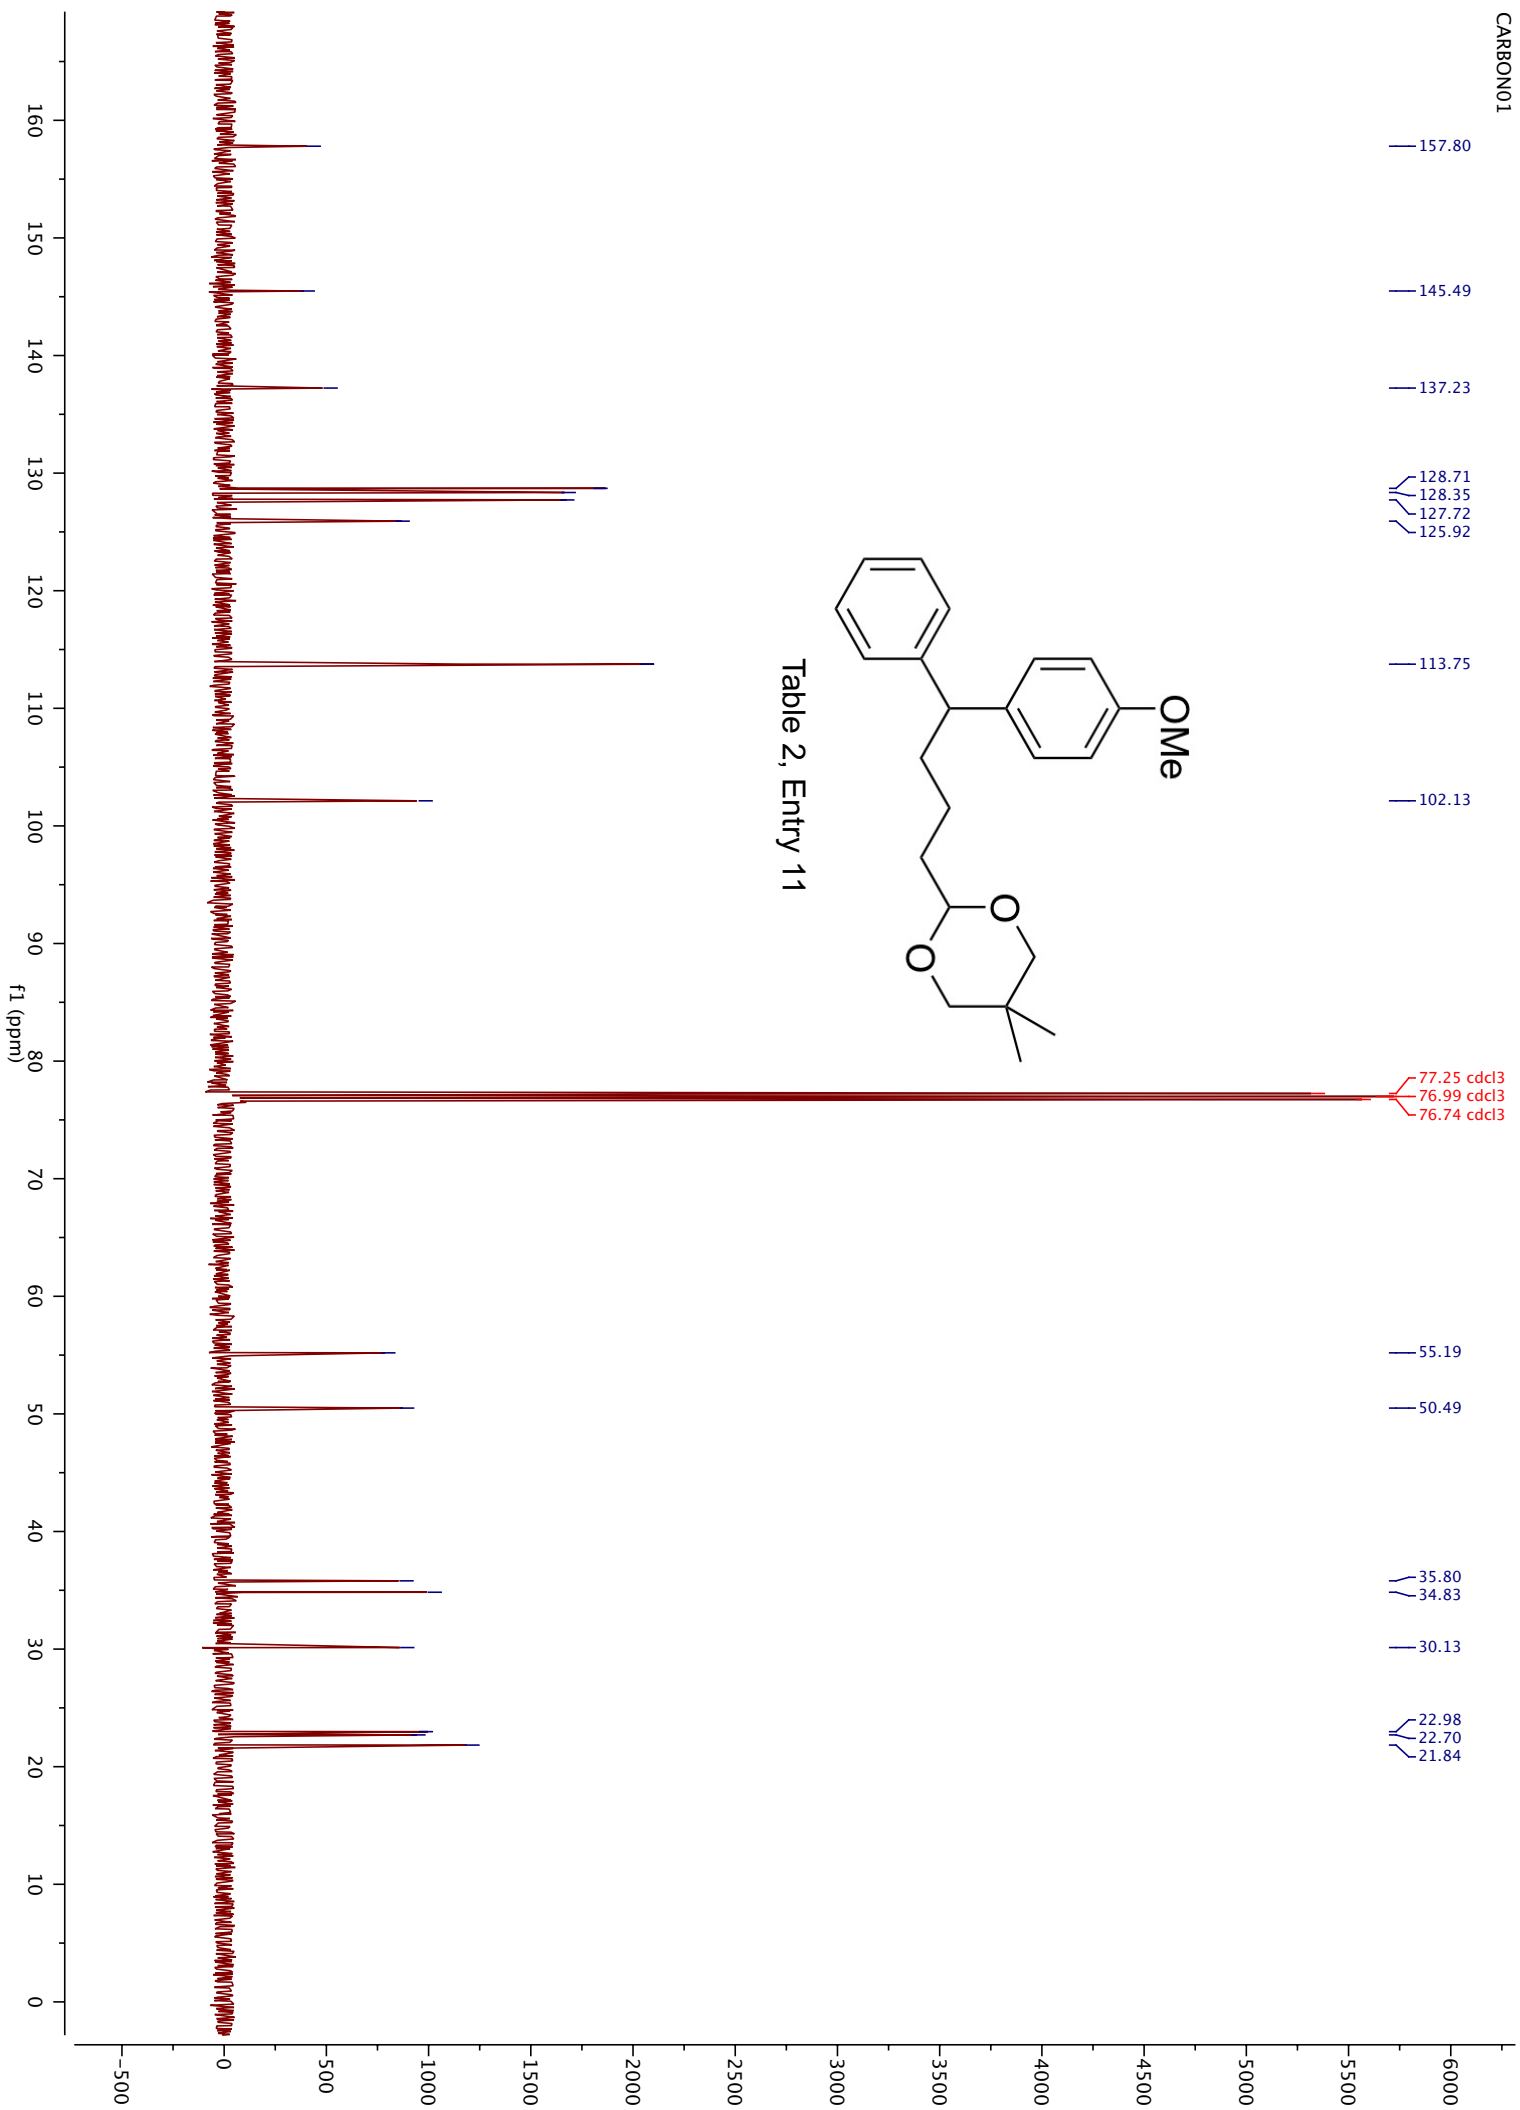

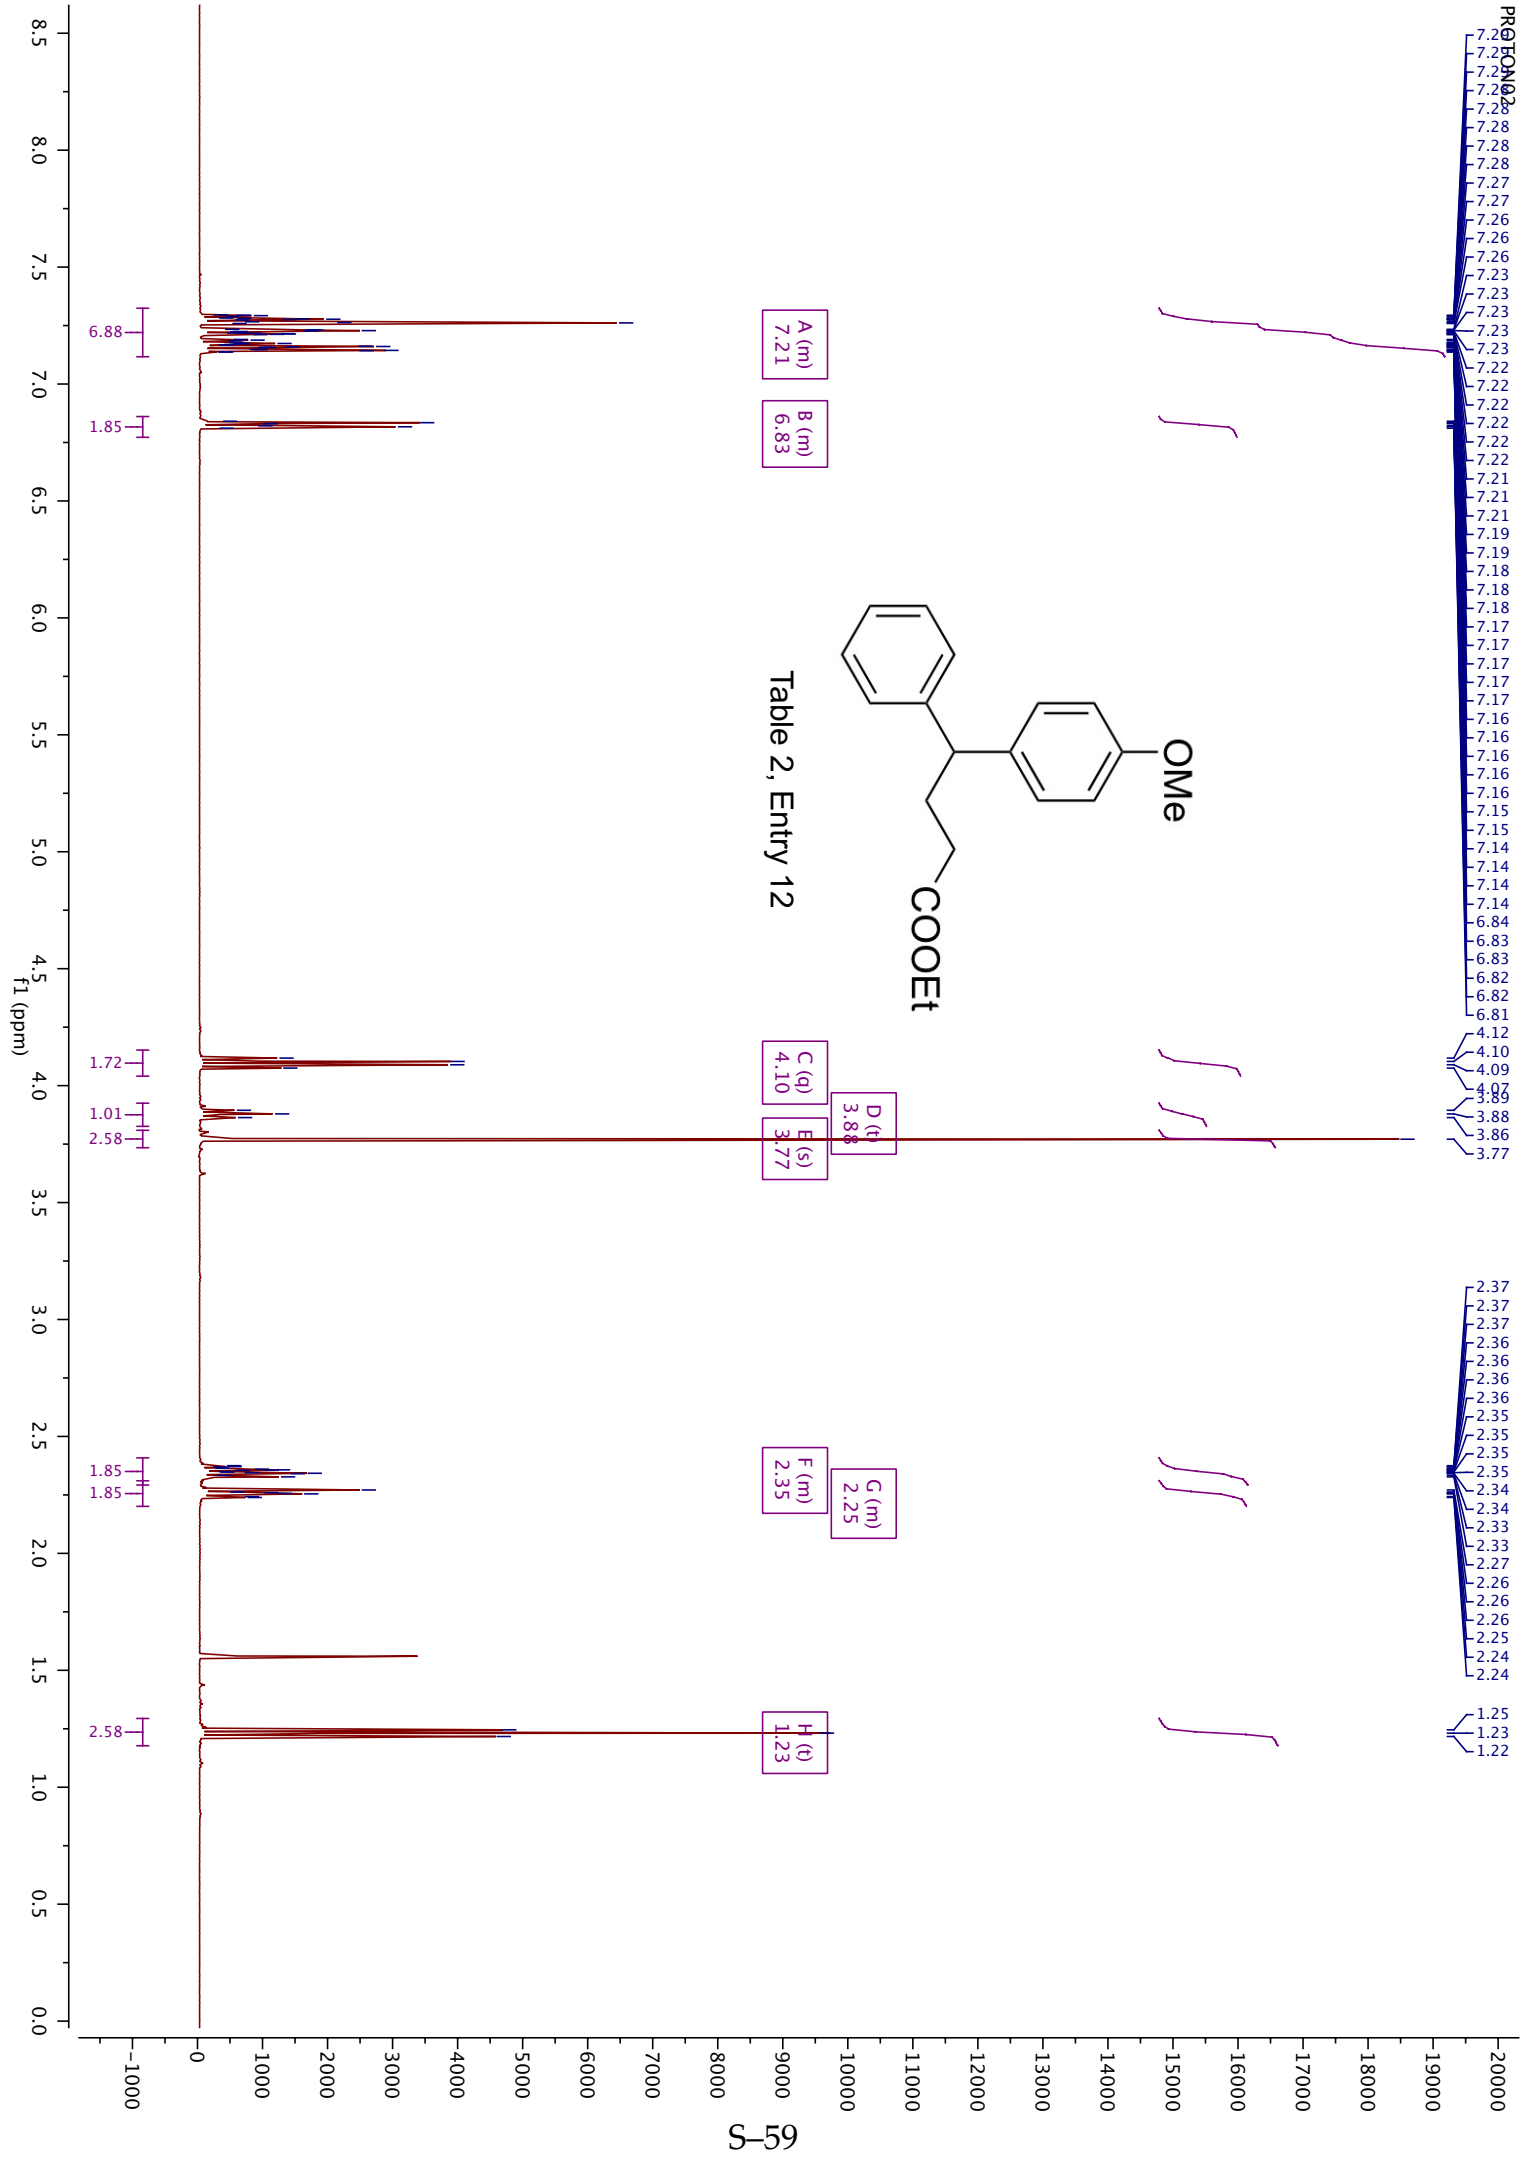

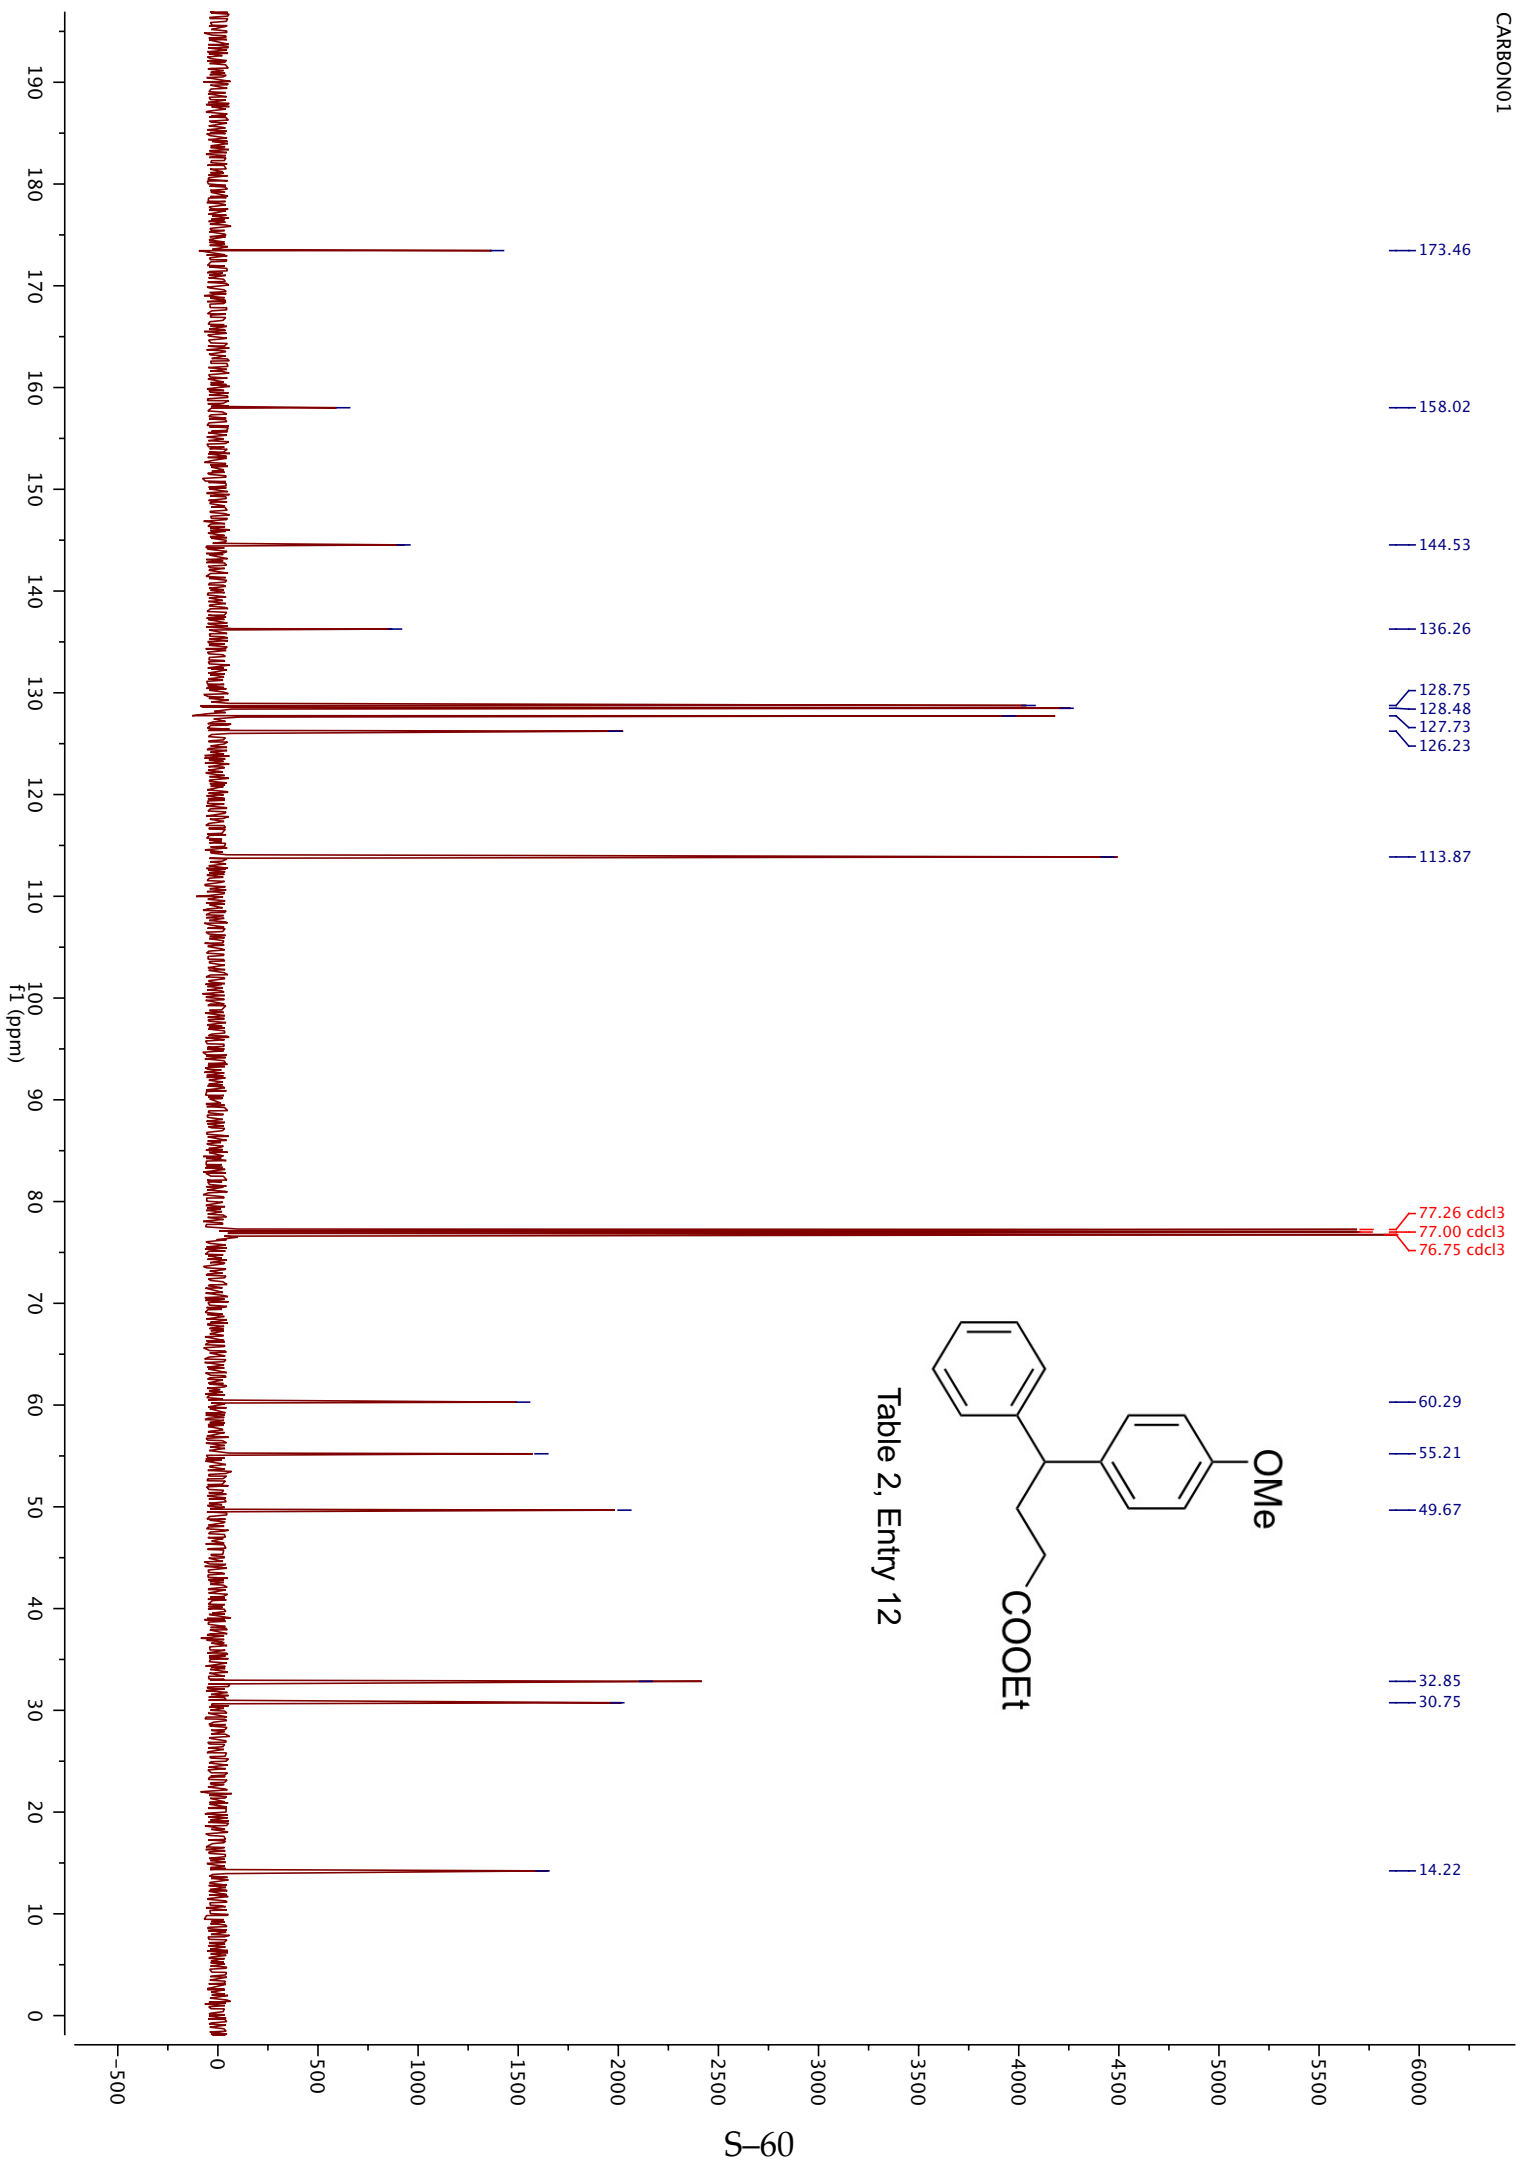

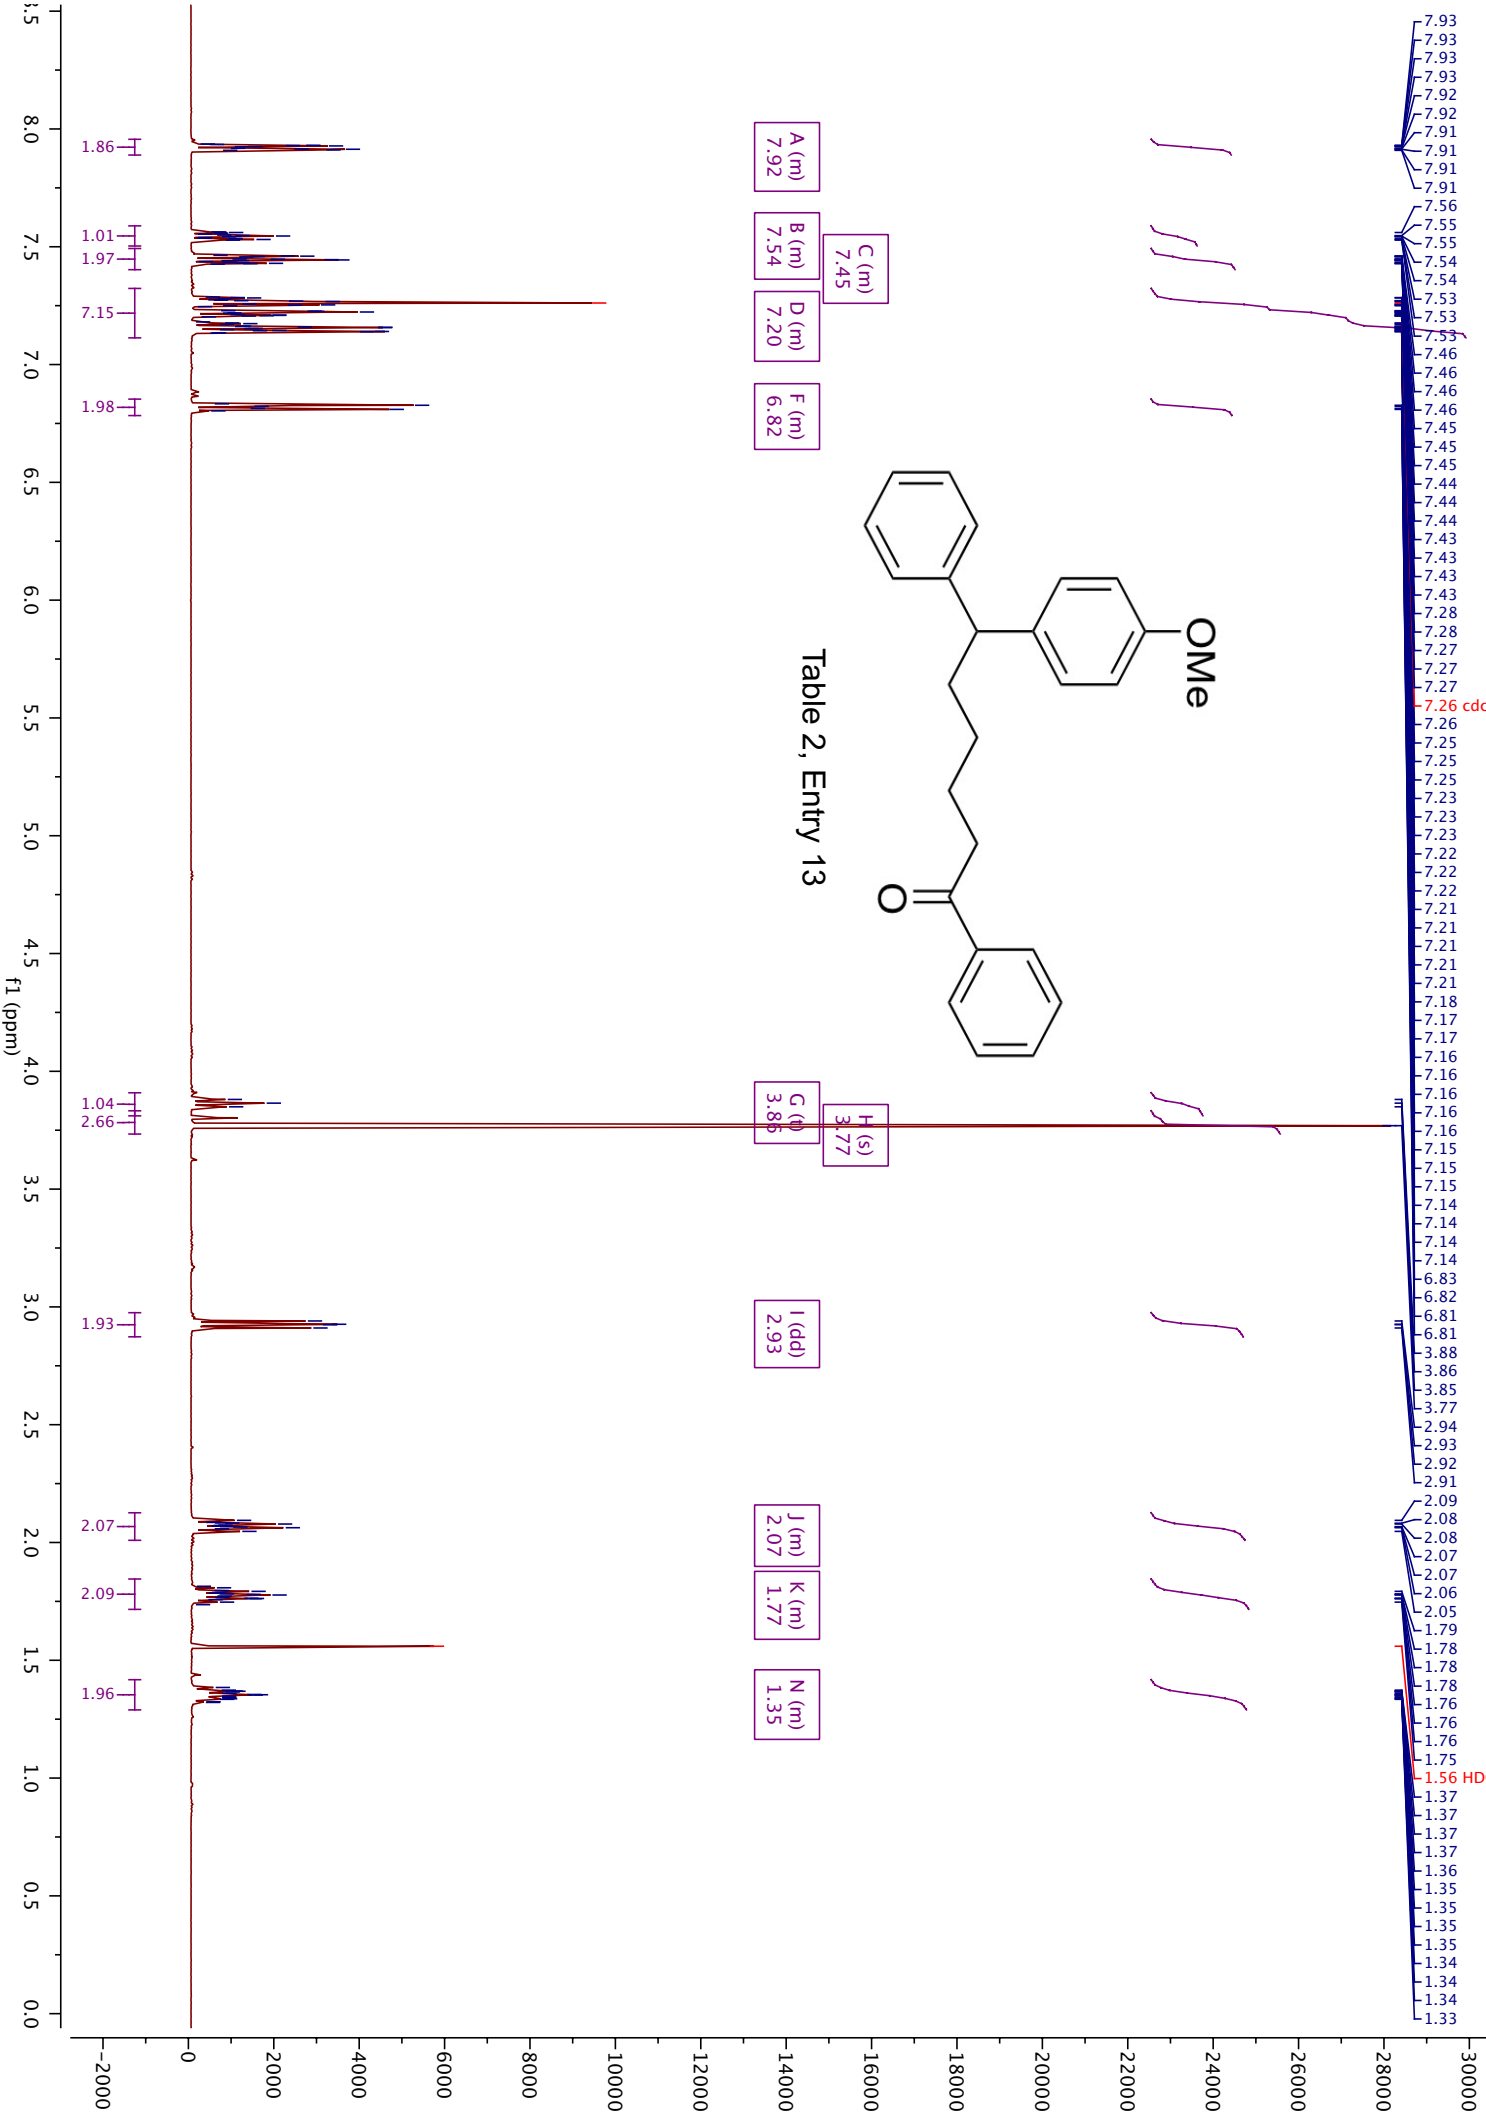

Table 2, Entry 13

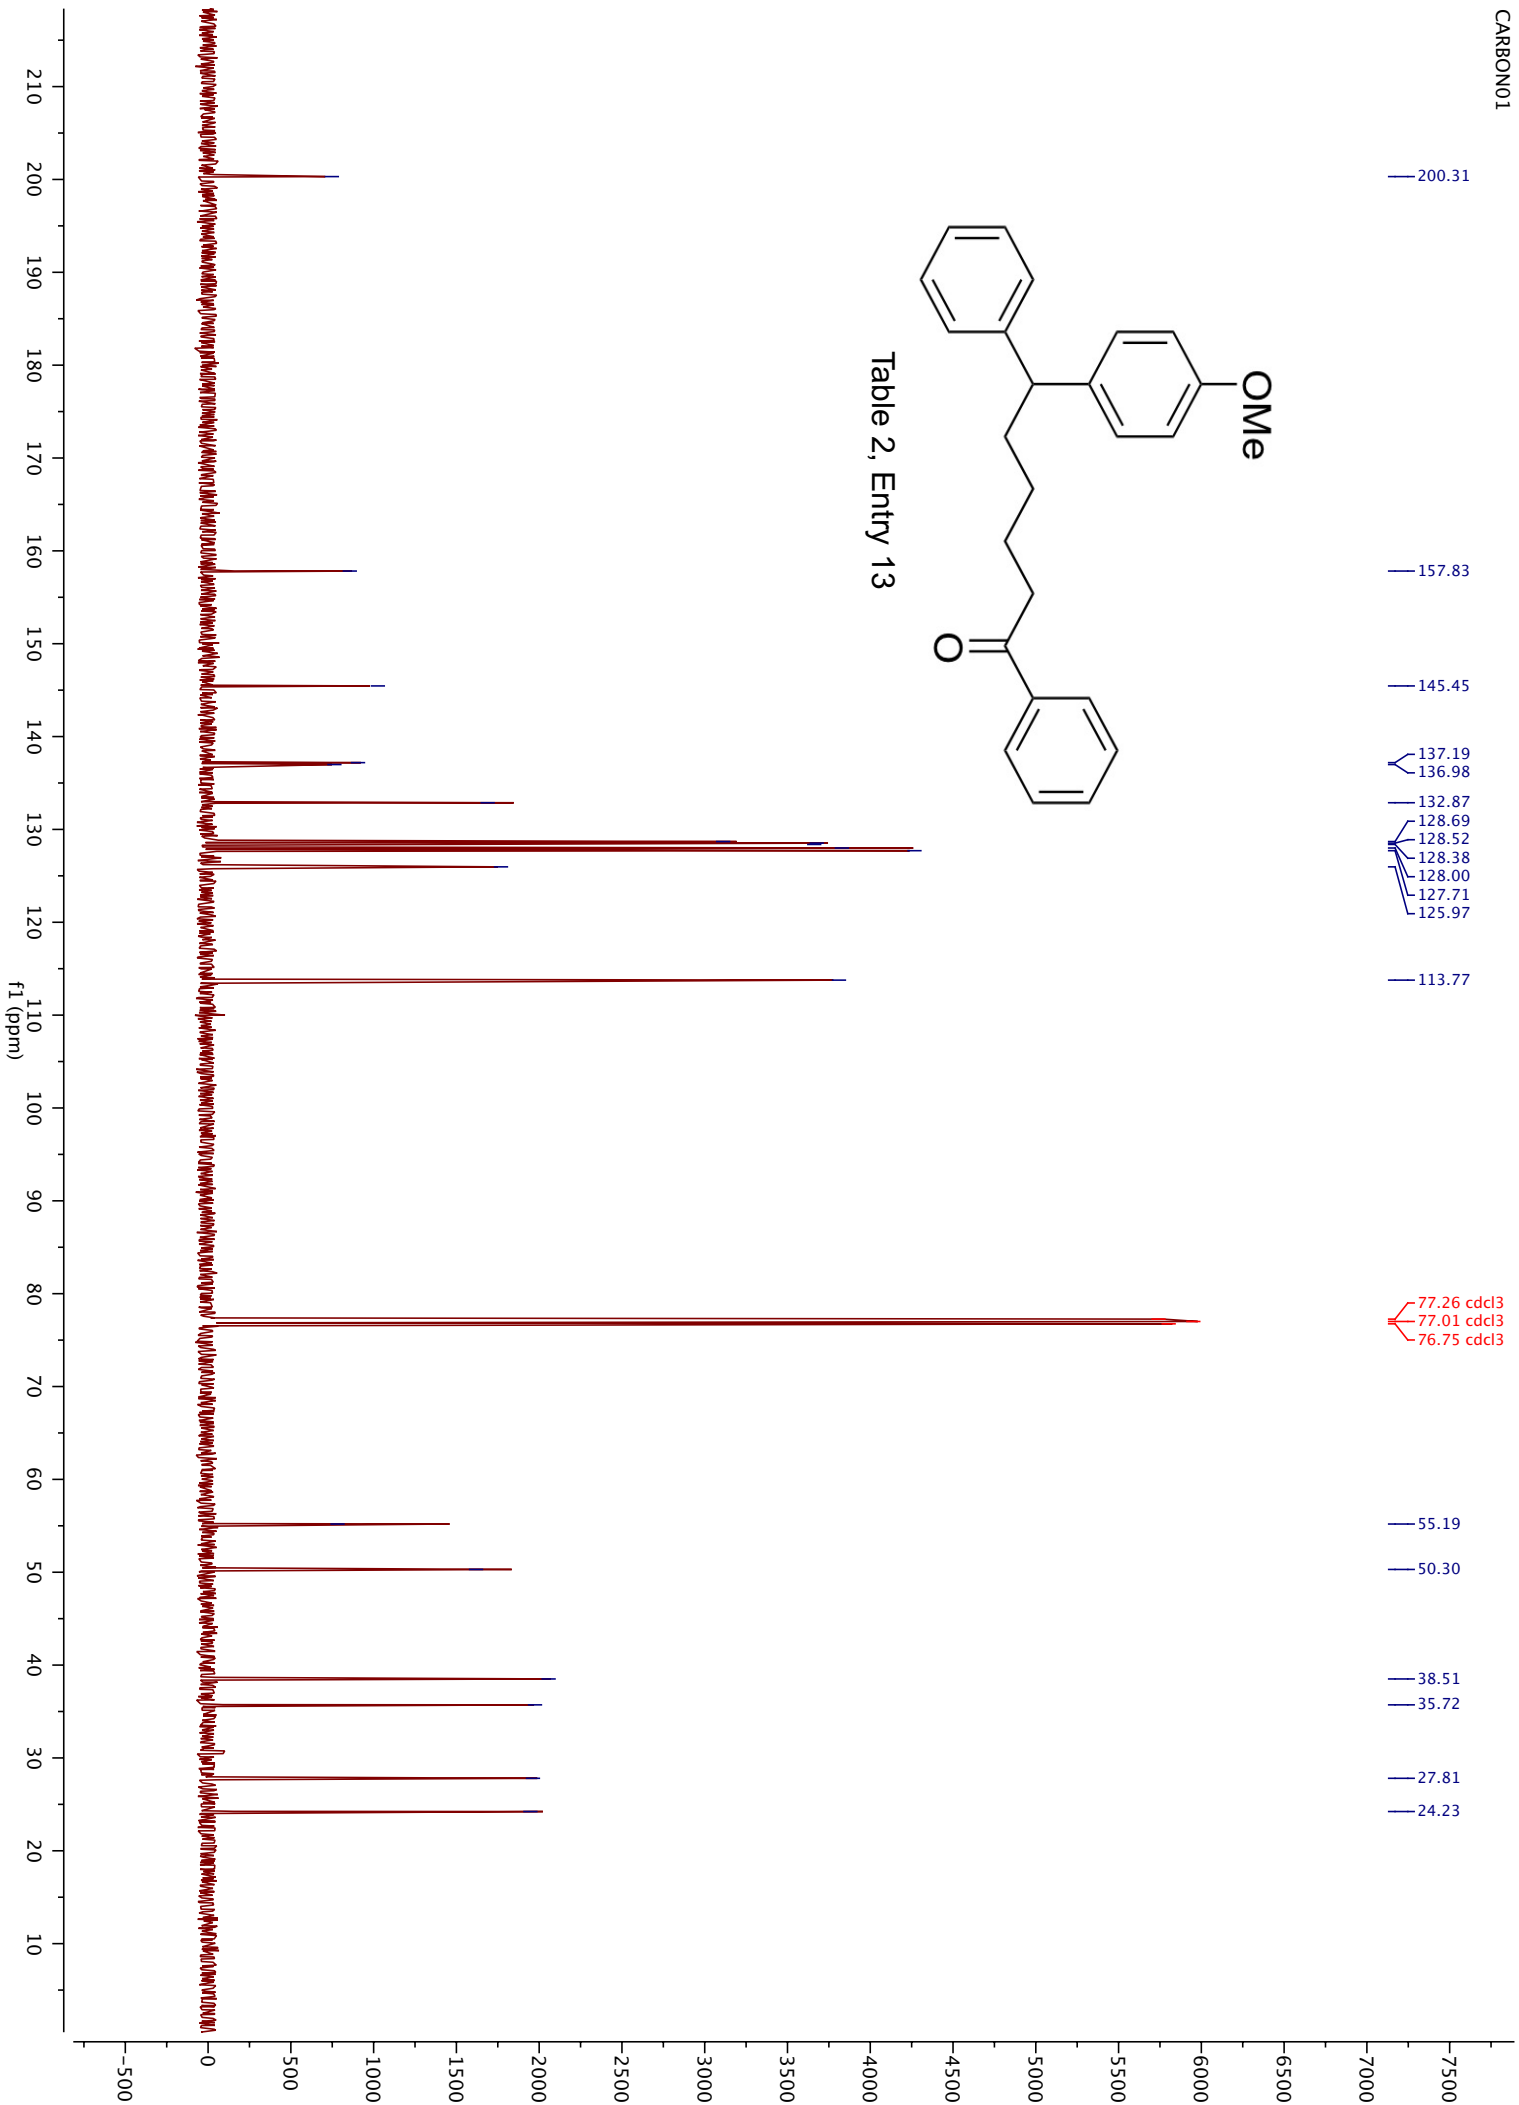

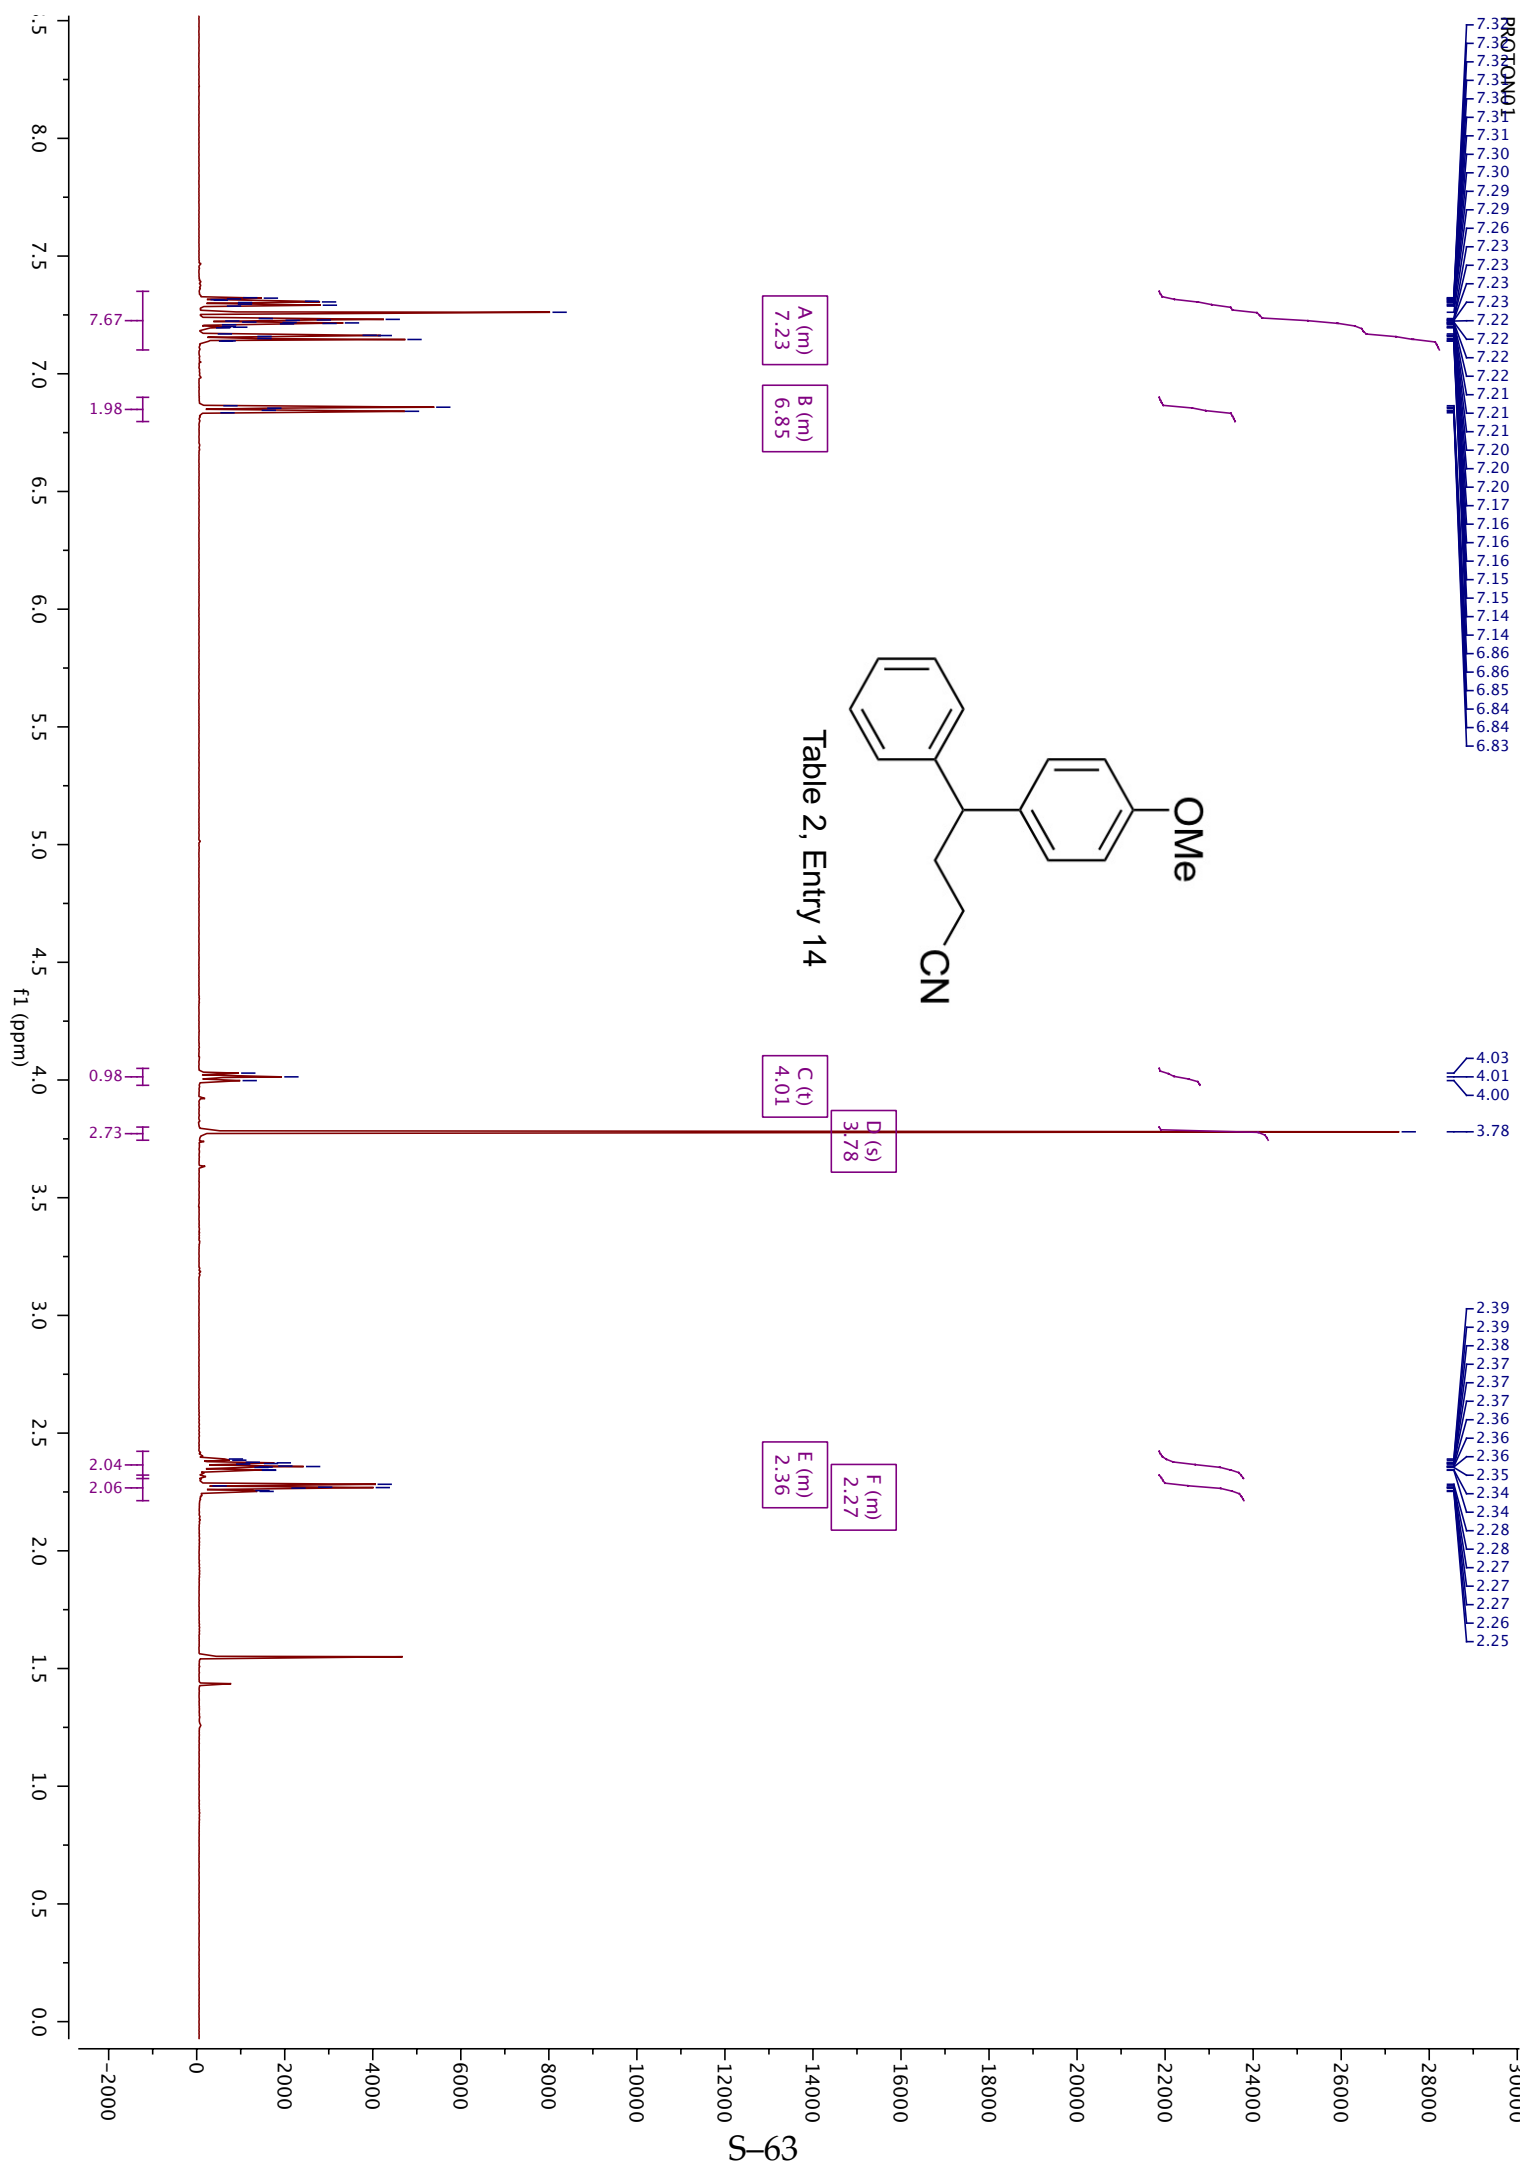

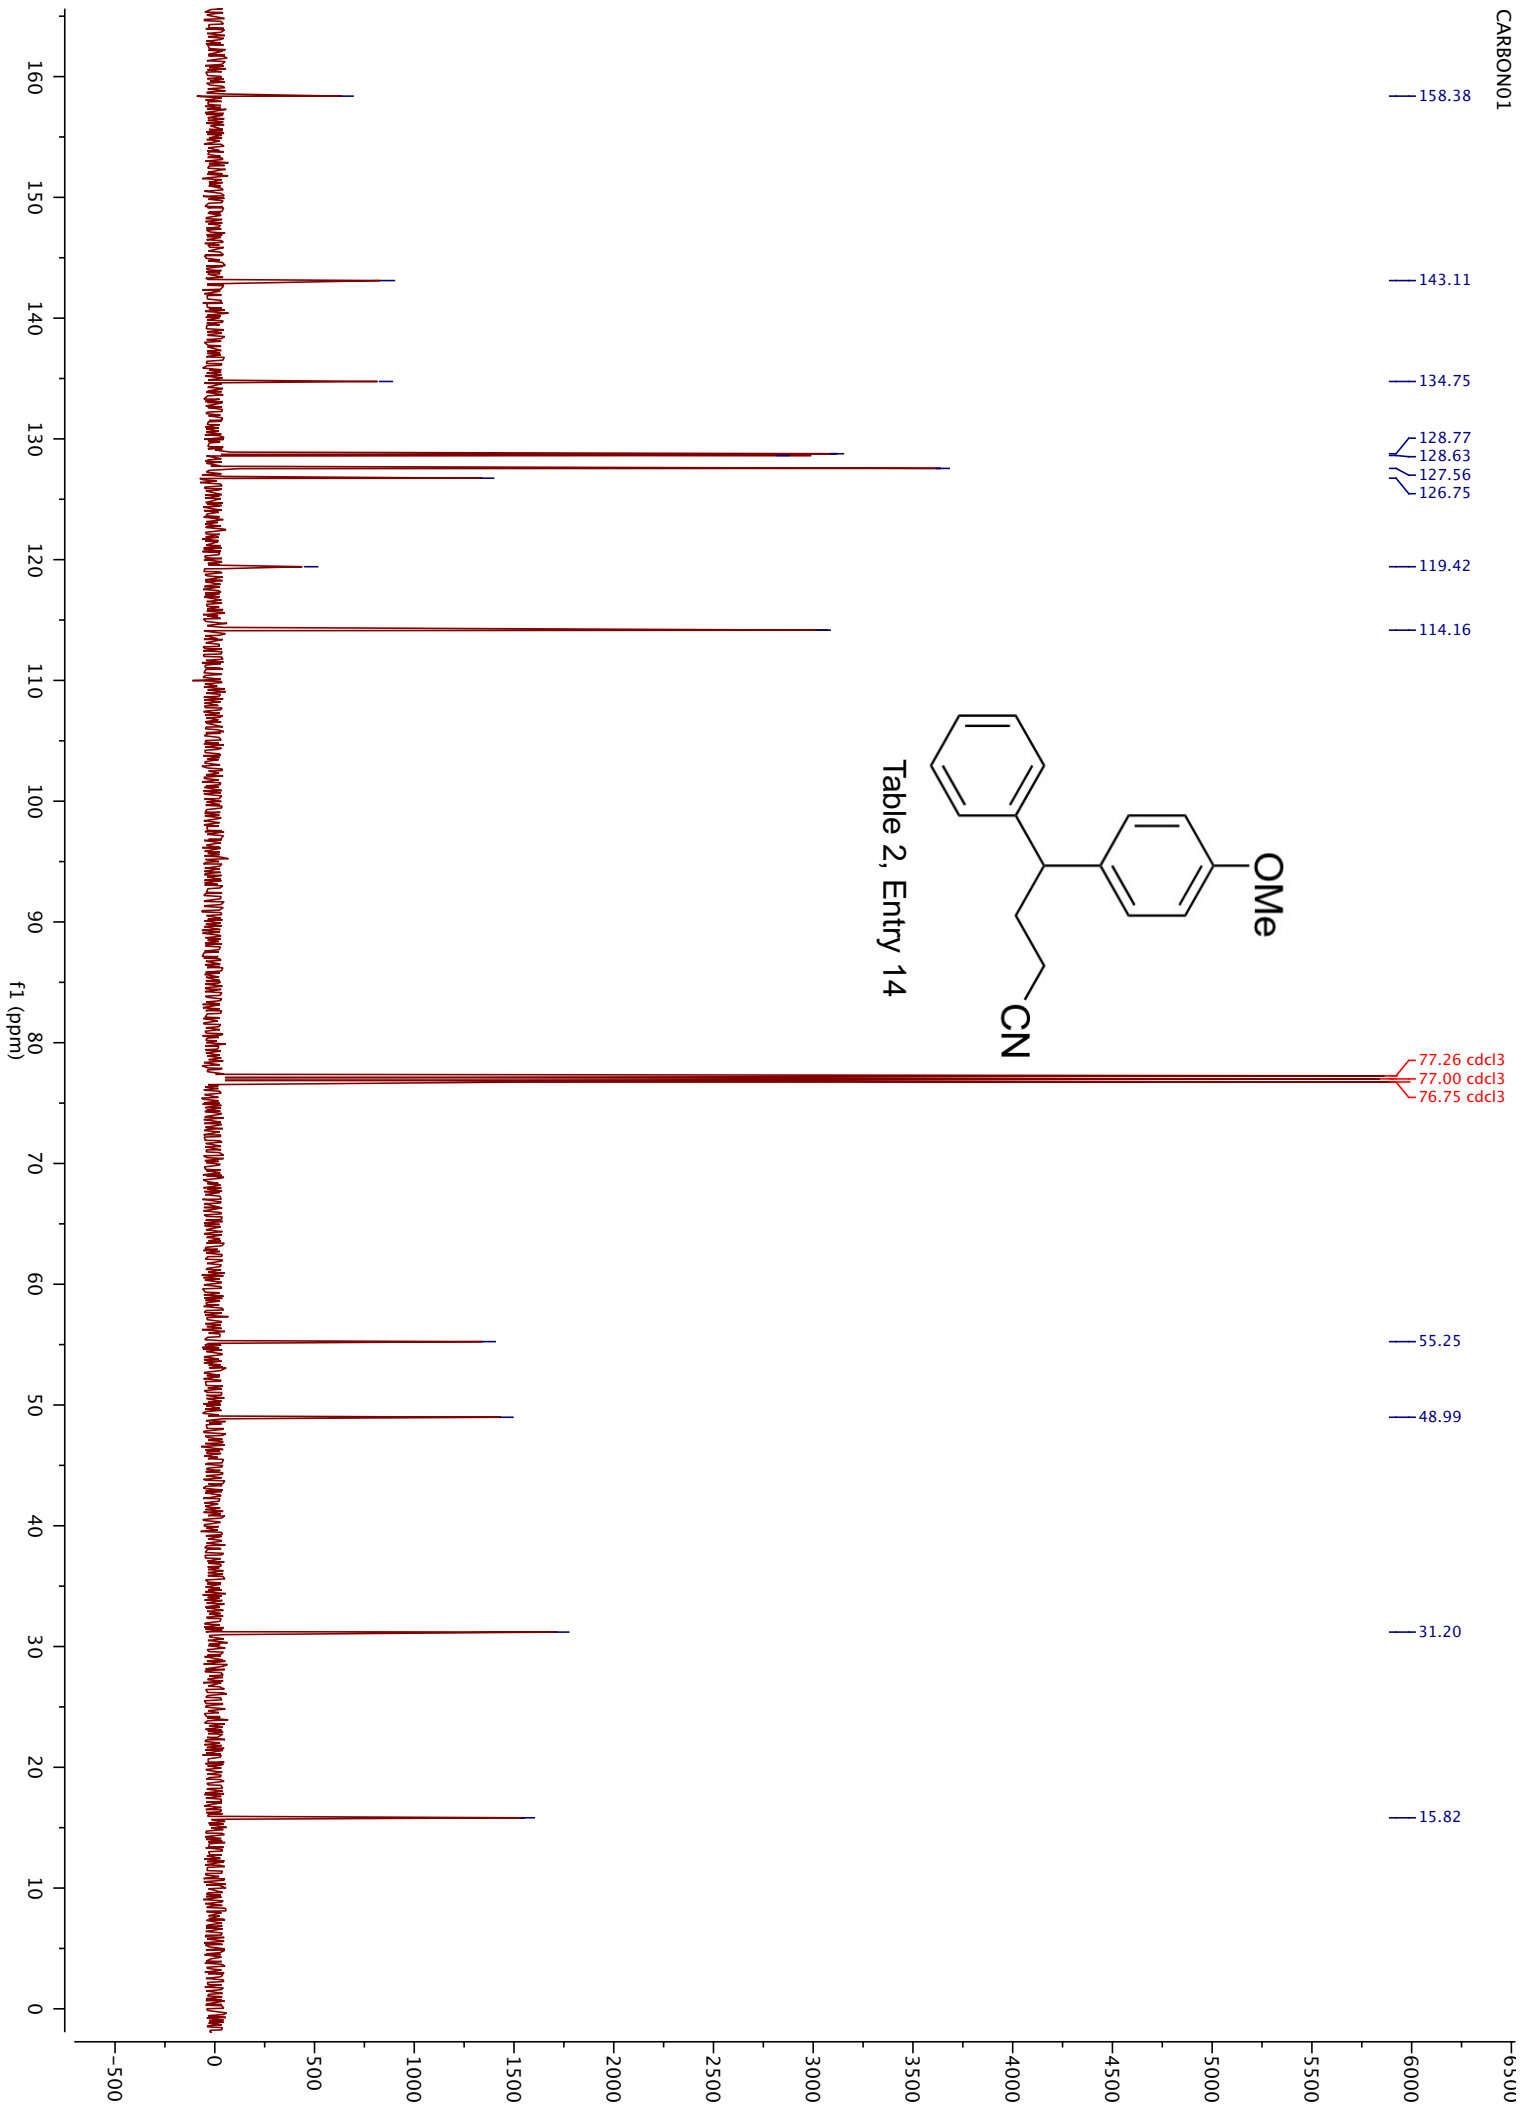



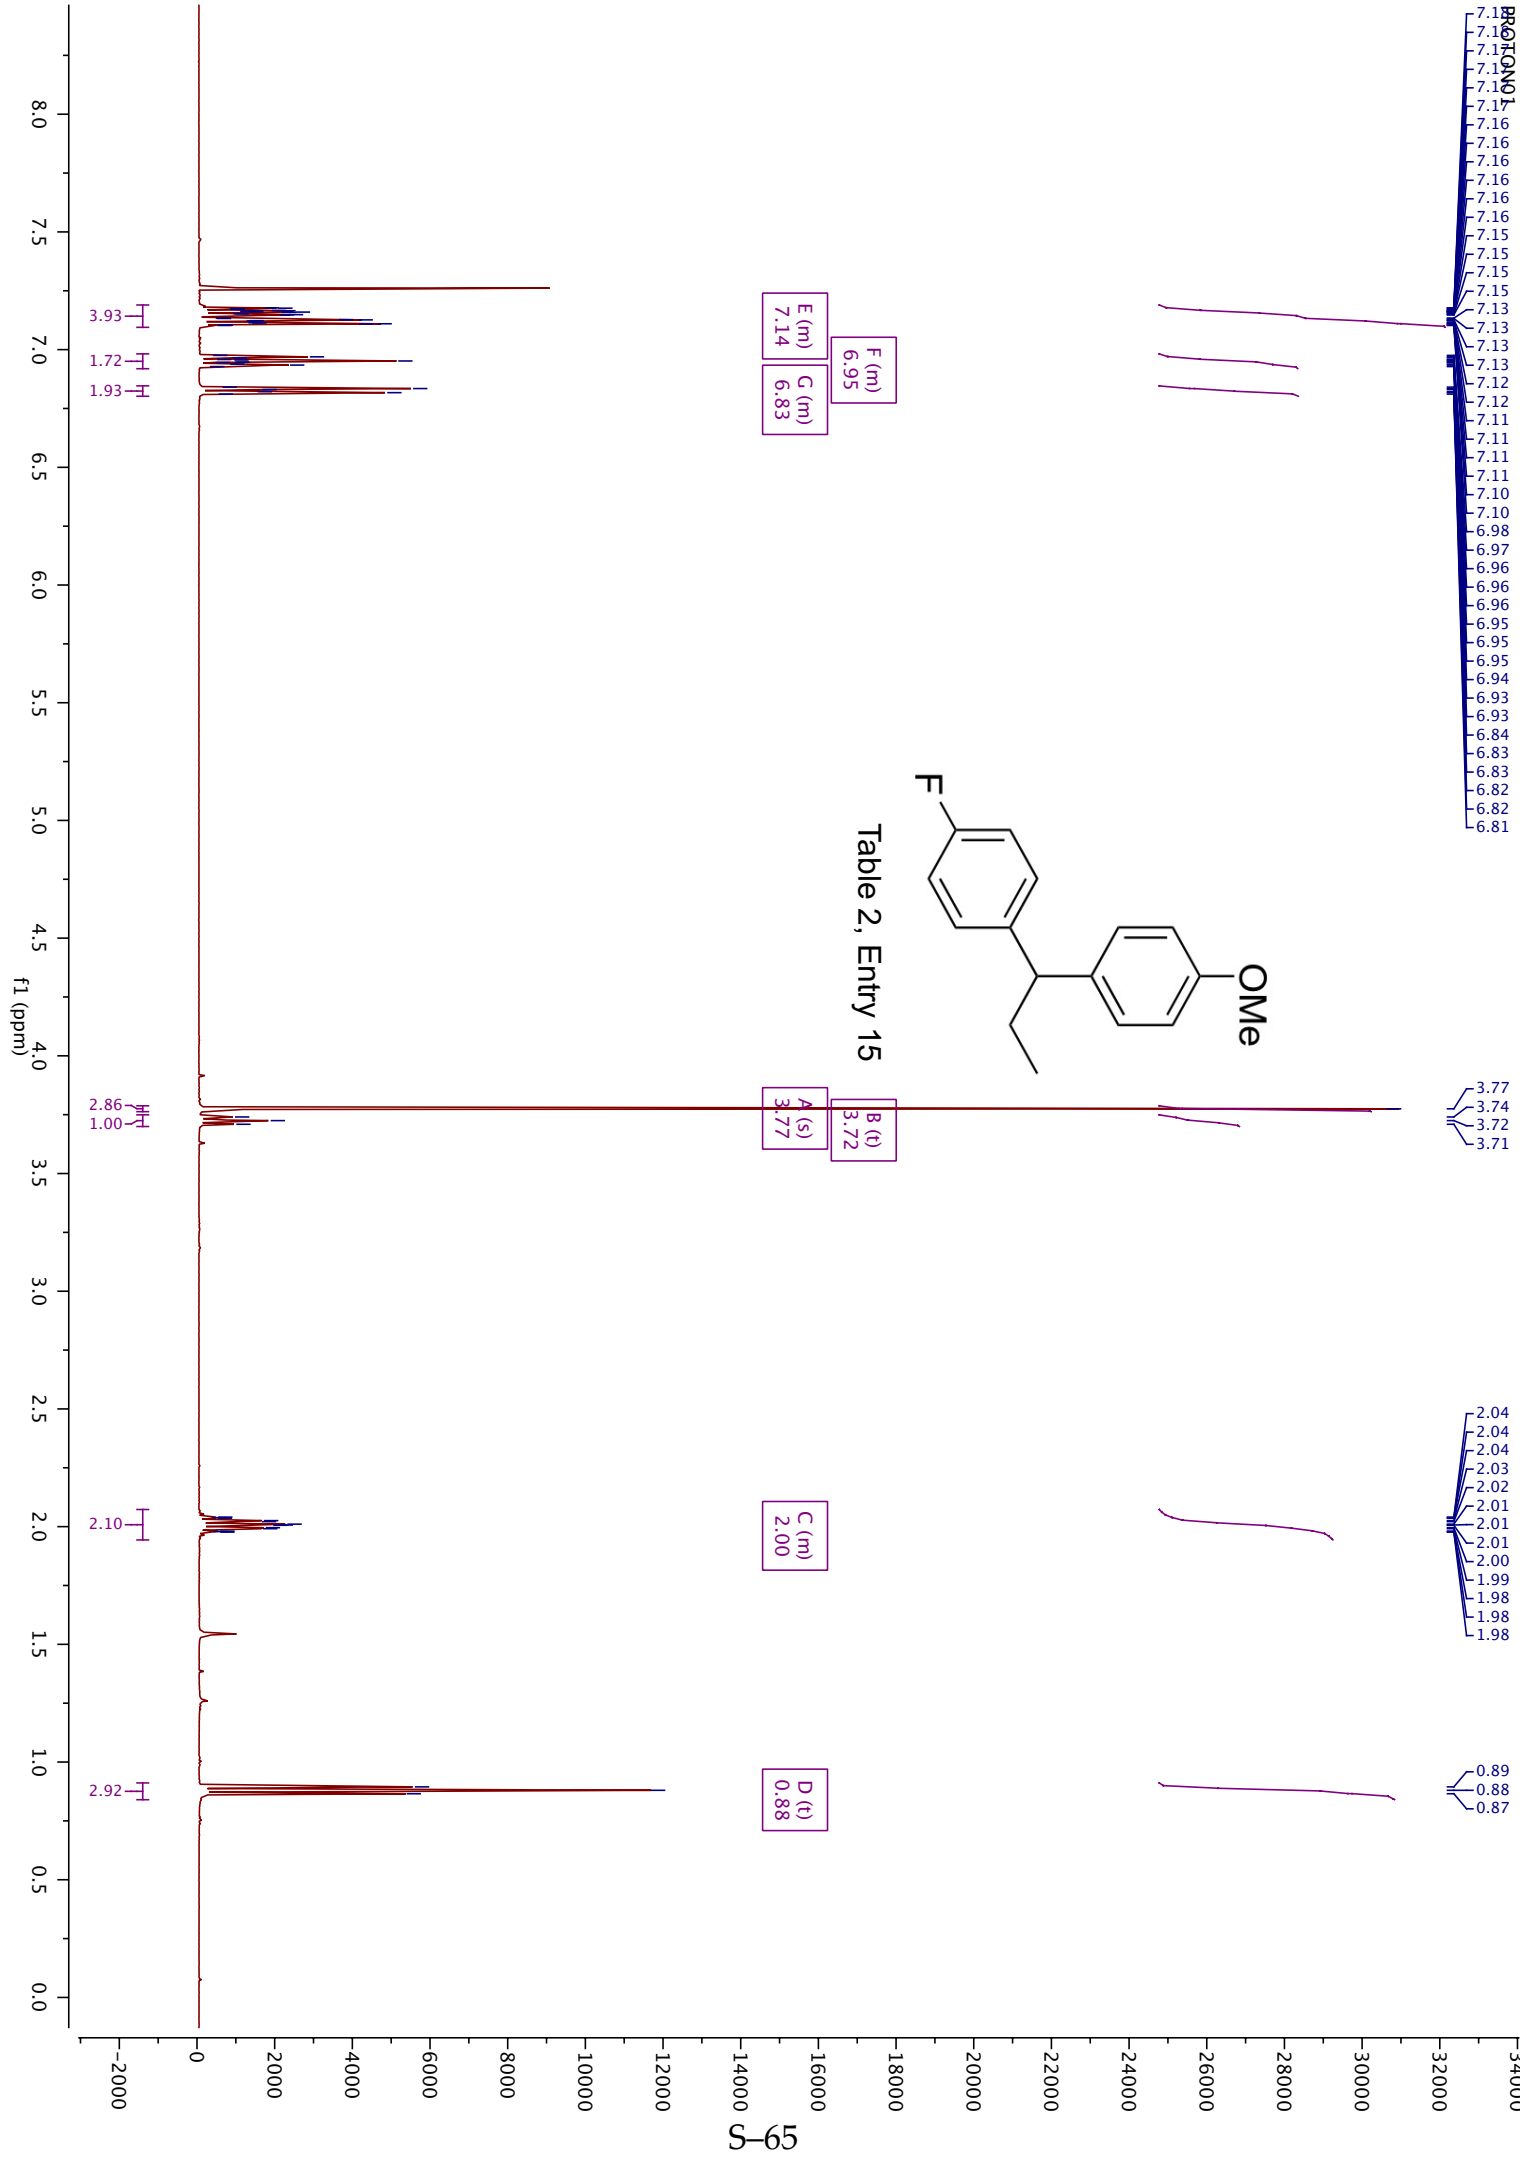

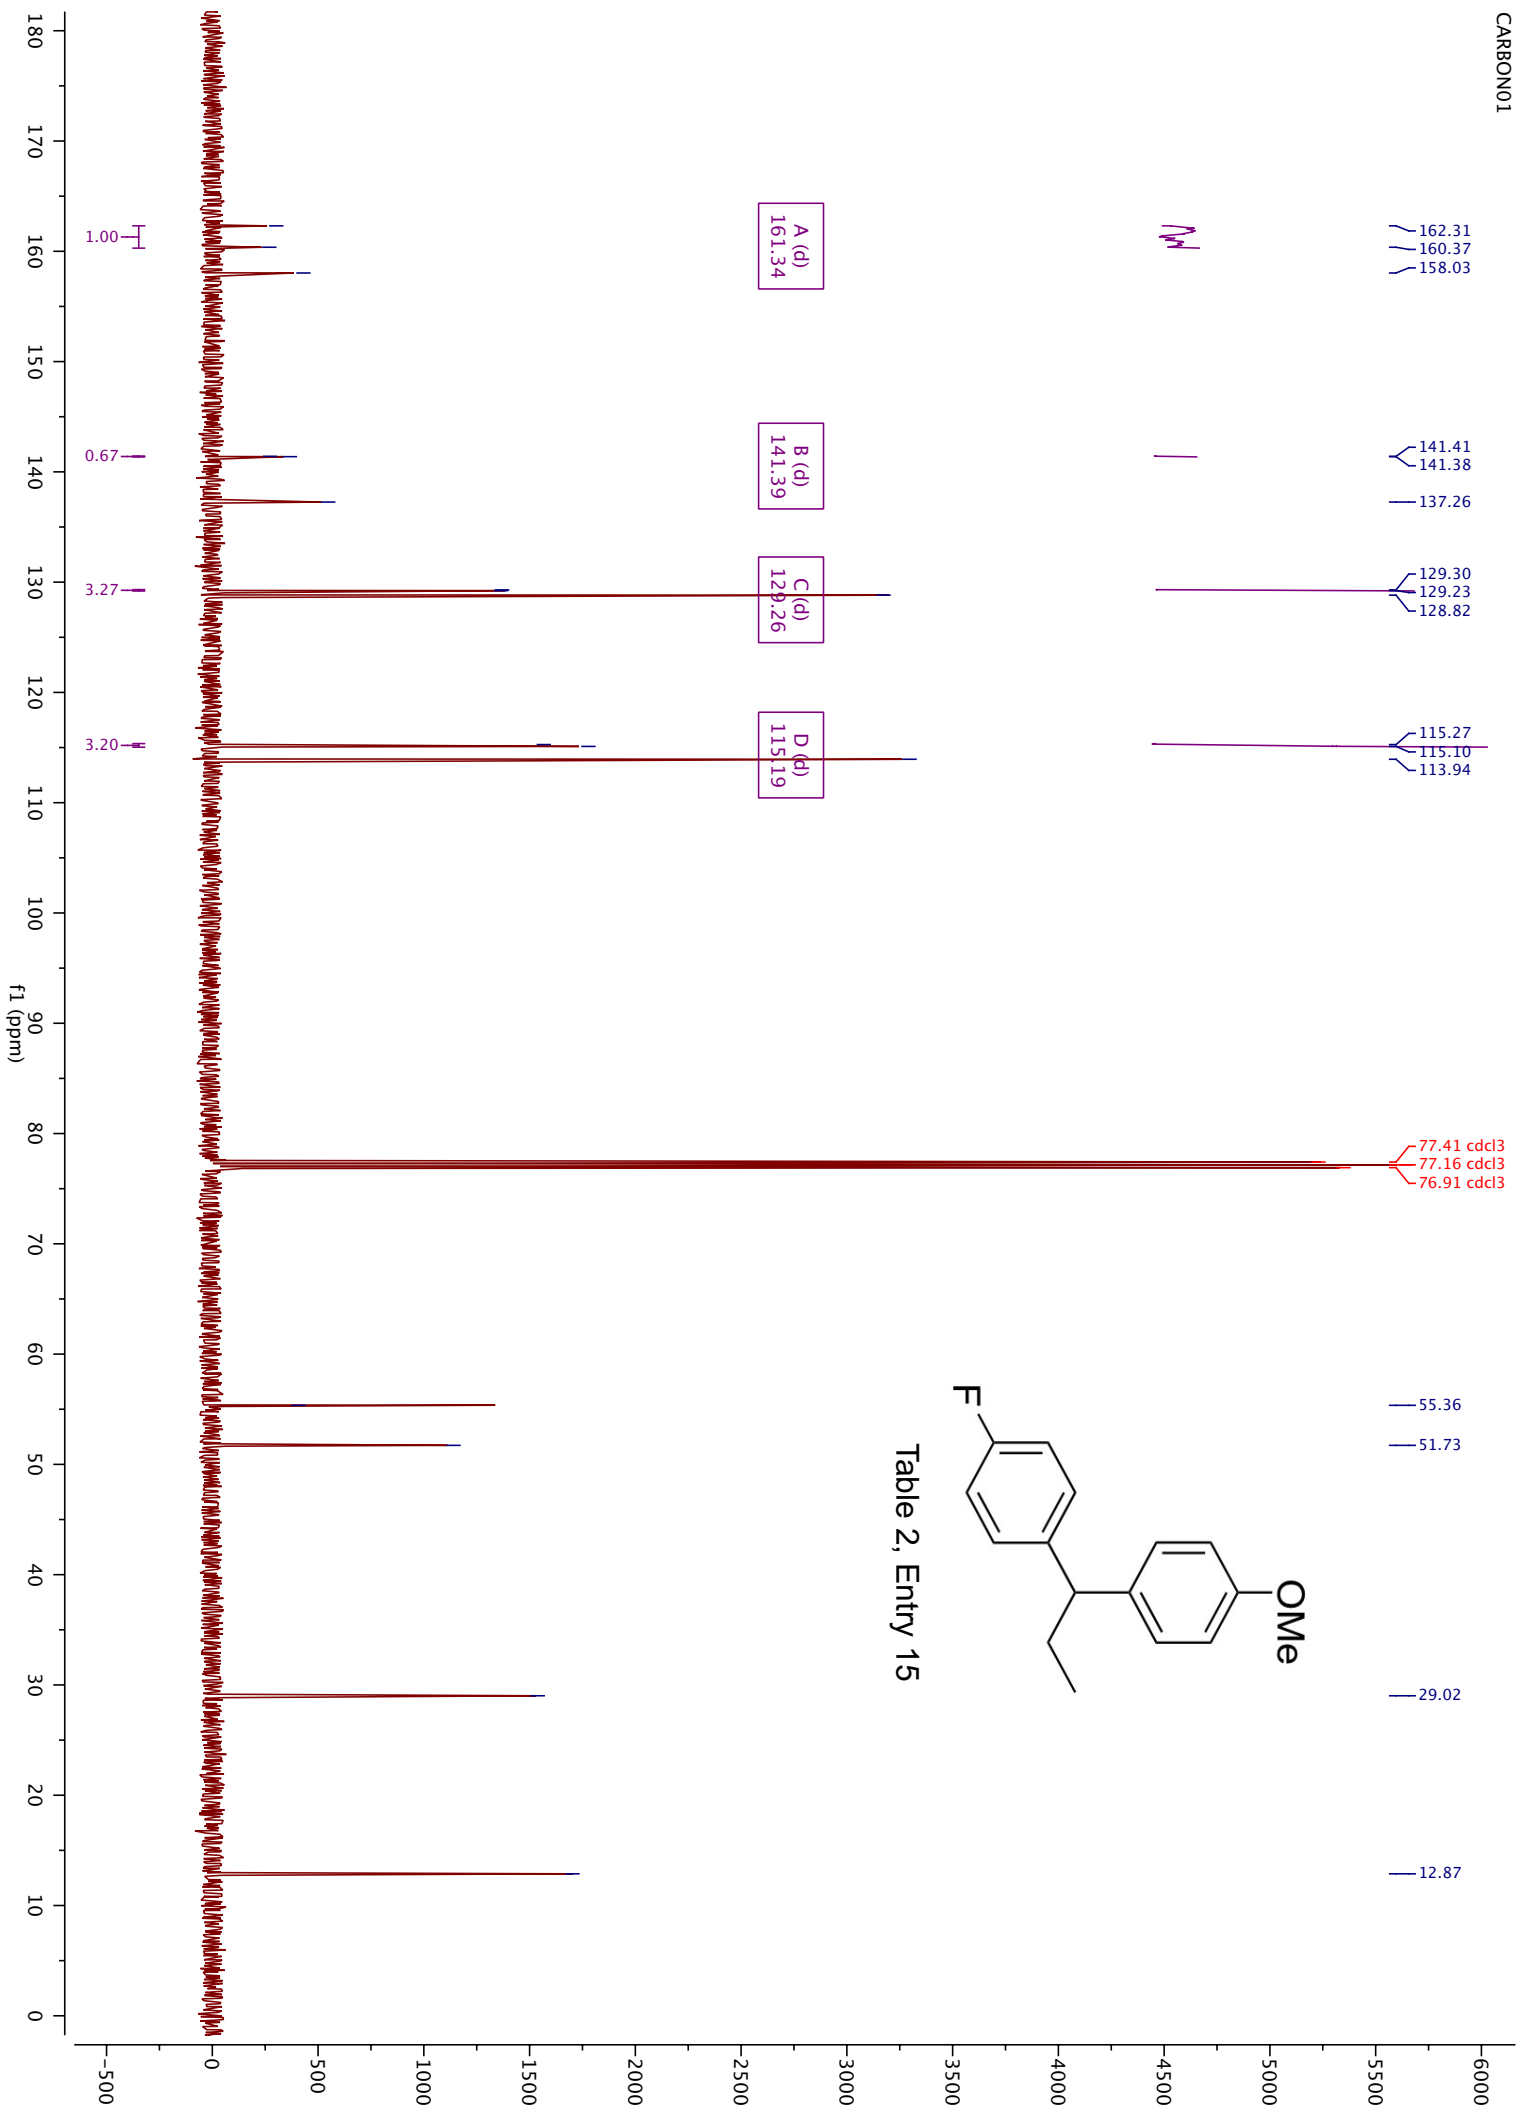

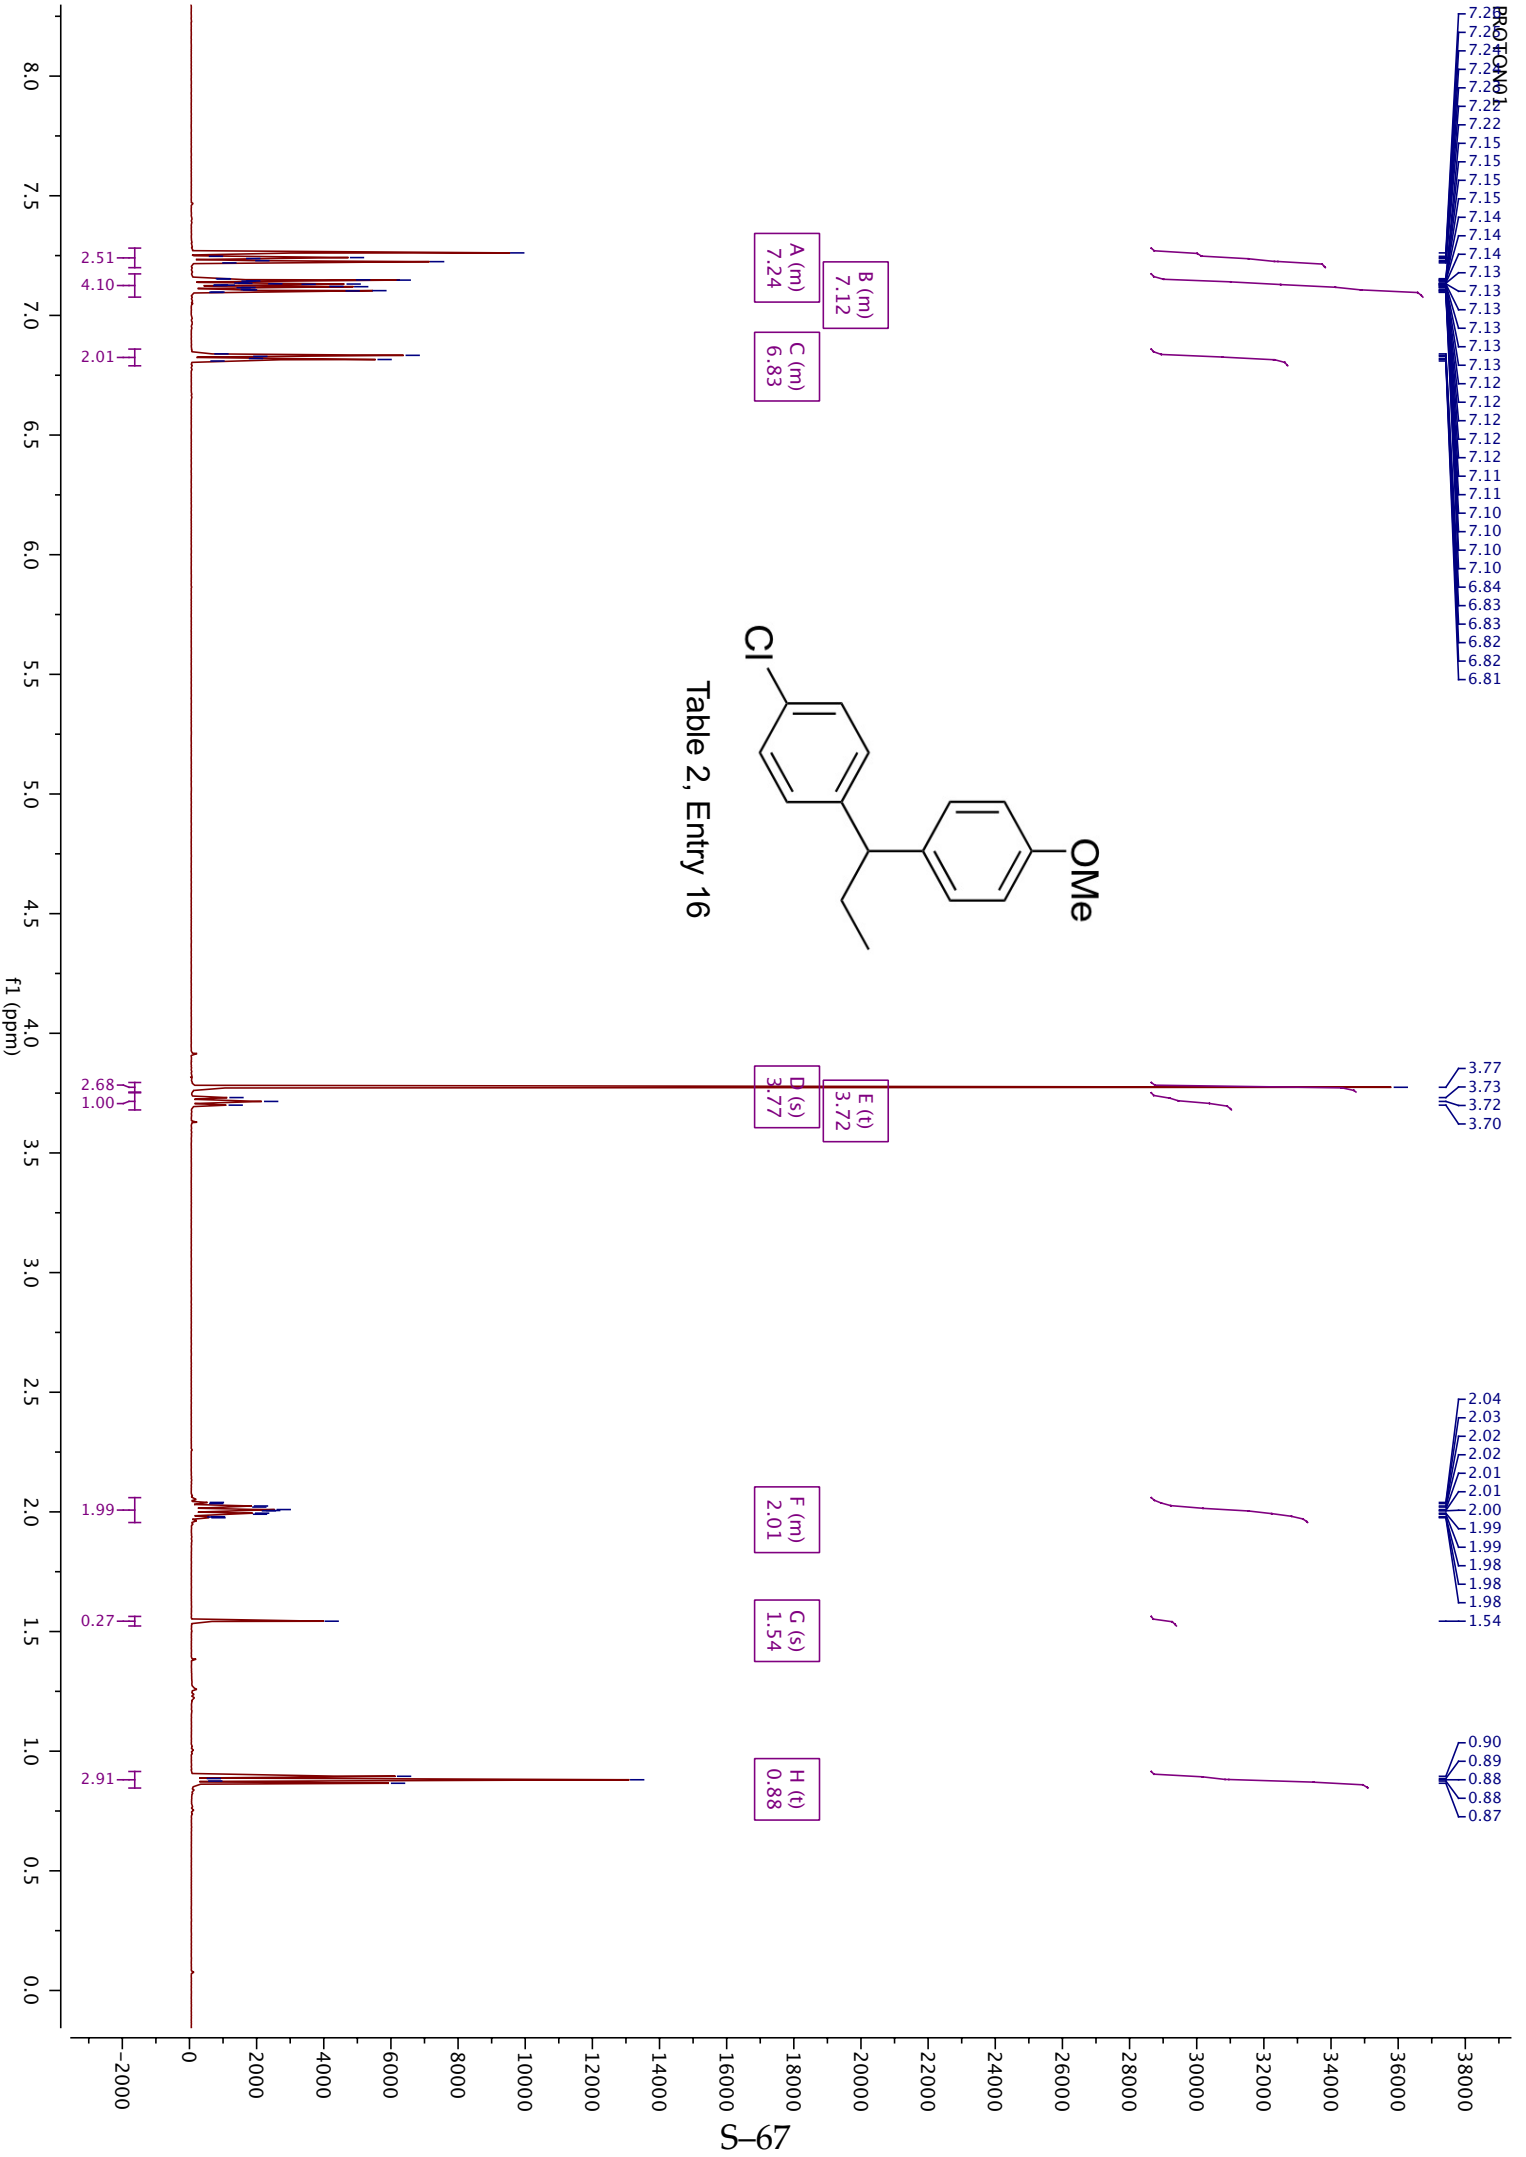

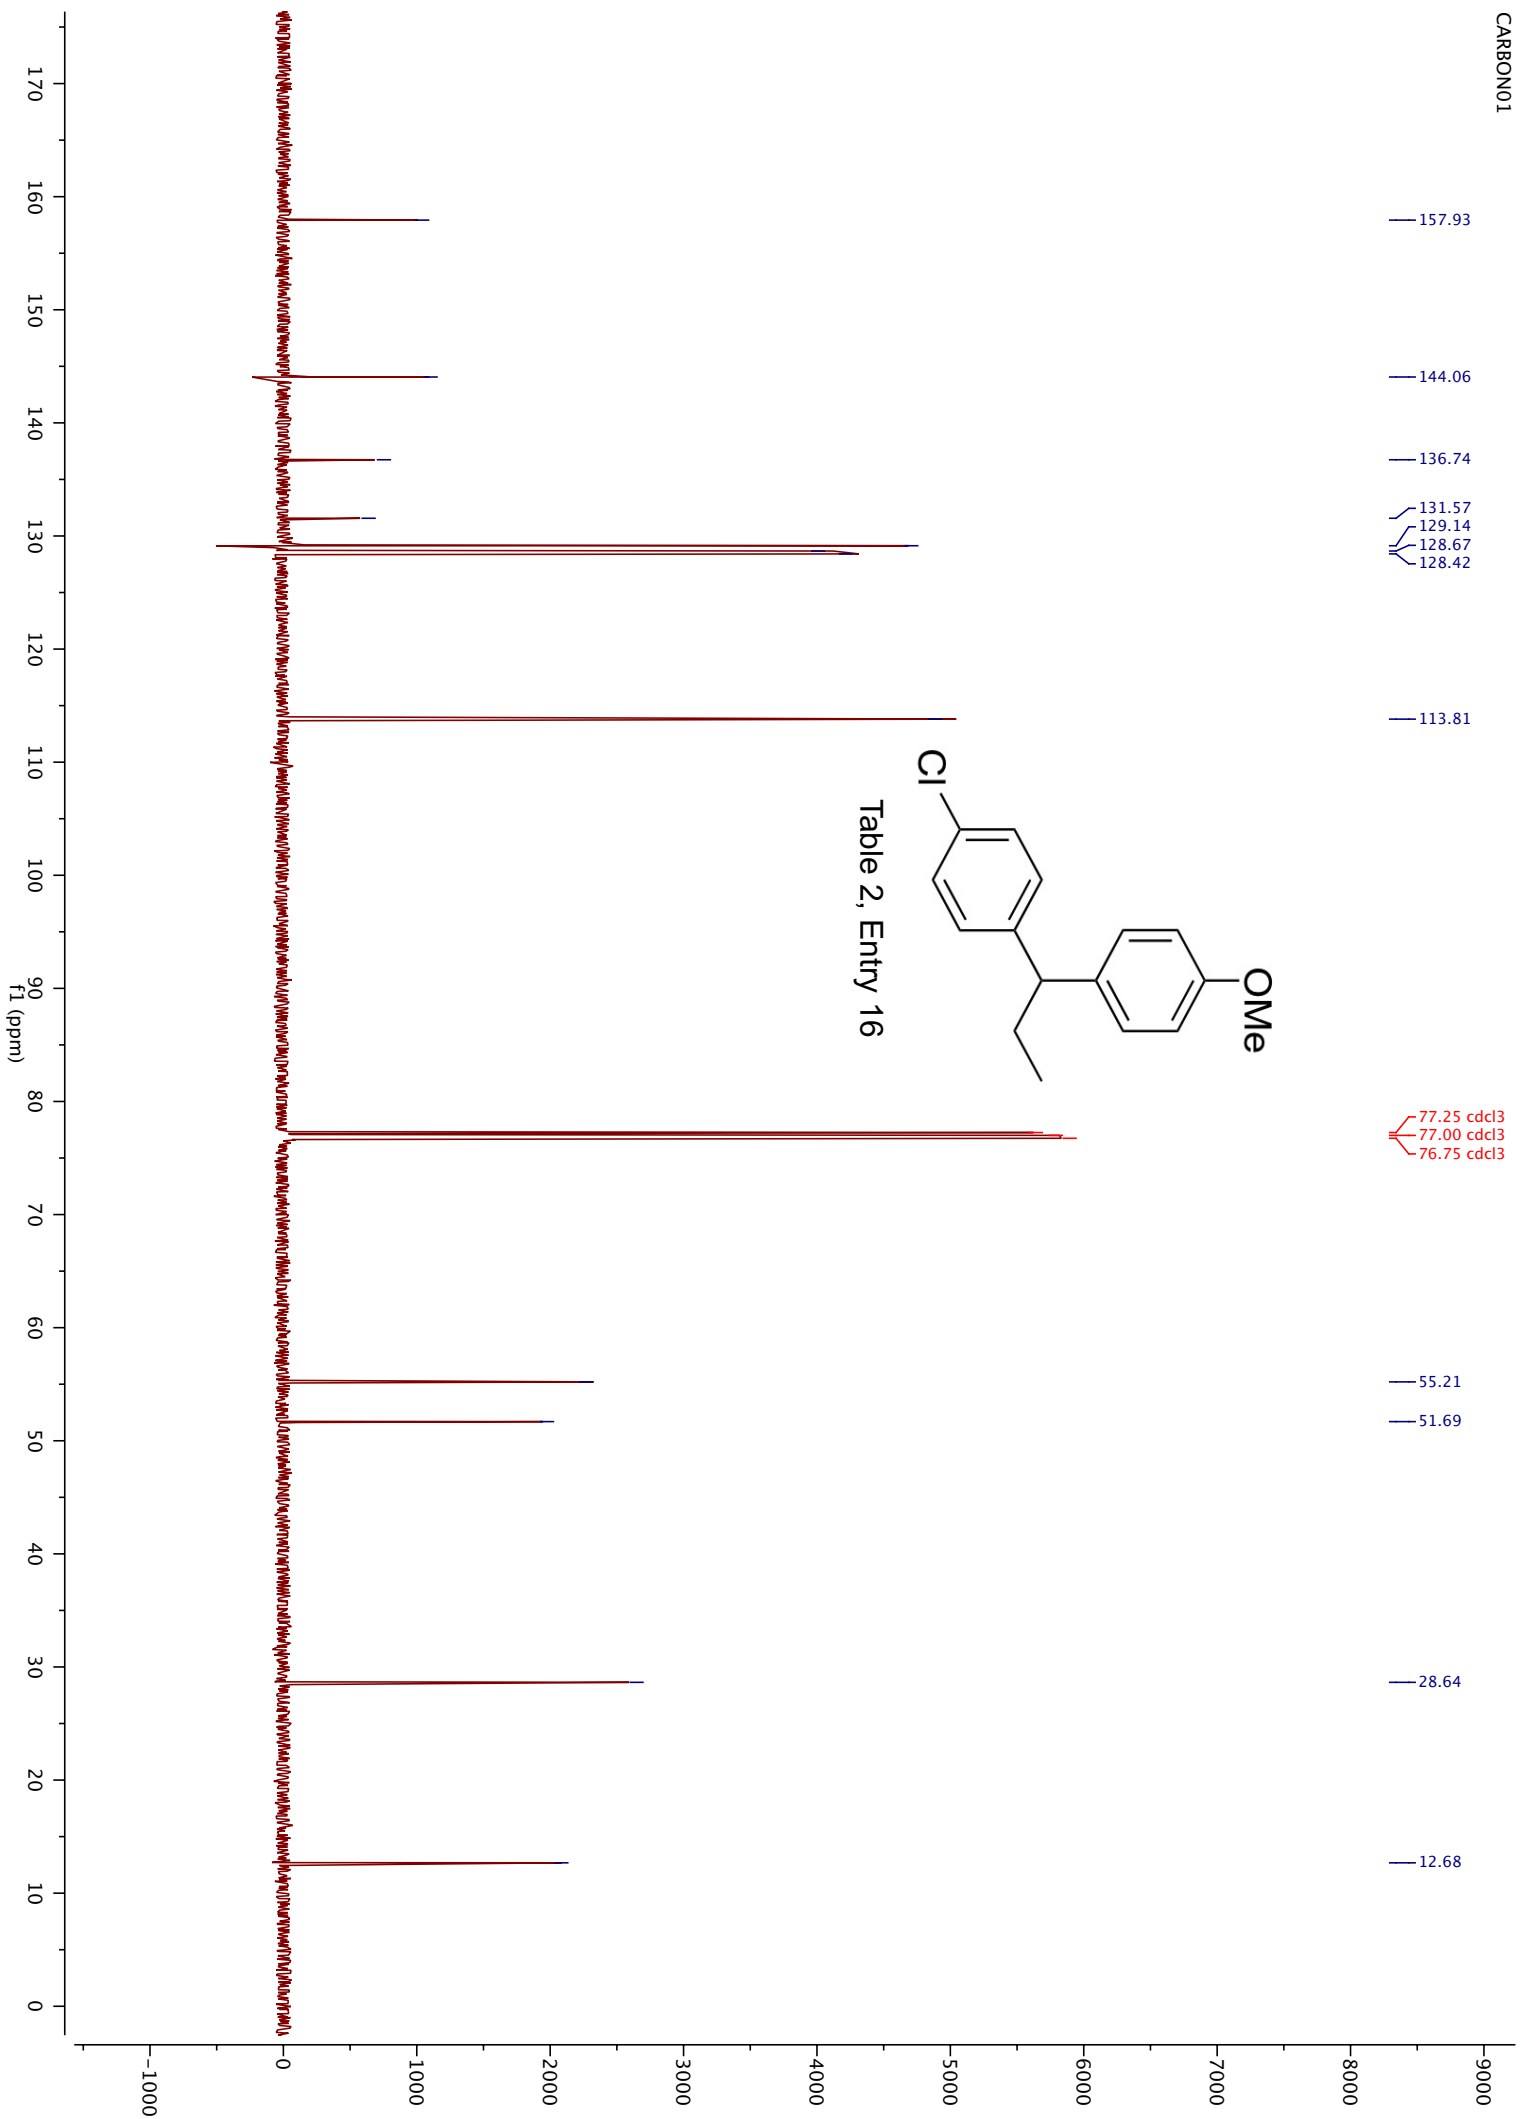

PROTON01

7.39  
7.39  
7.38  
7.38  
7.12  
7.11  
7.11  
7.10  
7.10  
7.10  
7.09  
7.09  
7.08  
7.08  
7.08  
6.84  
6.83  
6.83  
6.82  
6.82  
6.81  
6.81

3.77  
3.77  
3.72  
3.70  
3.69

2.05  
2.04  
2.04  
2.03  
2.02  
2.02  
2.01  
2.00  
2.00  
1.99  
1.99  
1.98  
1.98  
1.97  
1.96

0.90  
0.89  
0.89  
0.88  
0.88  
0.87

-7.26 cdcl3

A (m) 7.38  
B (m) 7.10  
C (m) 6.83

D (s) 3.77  
E (t) 3.70

F (m) 2.01

H (t) 0.88

Table 2, Entry 17

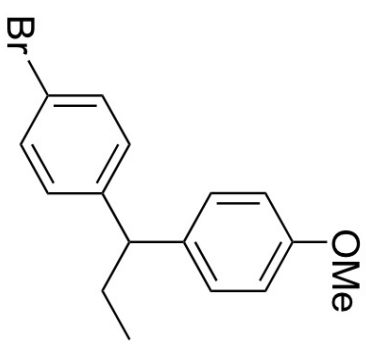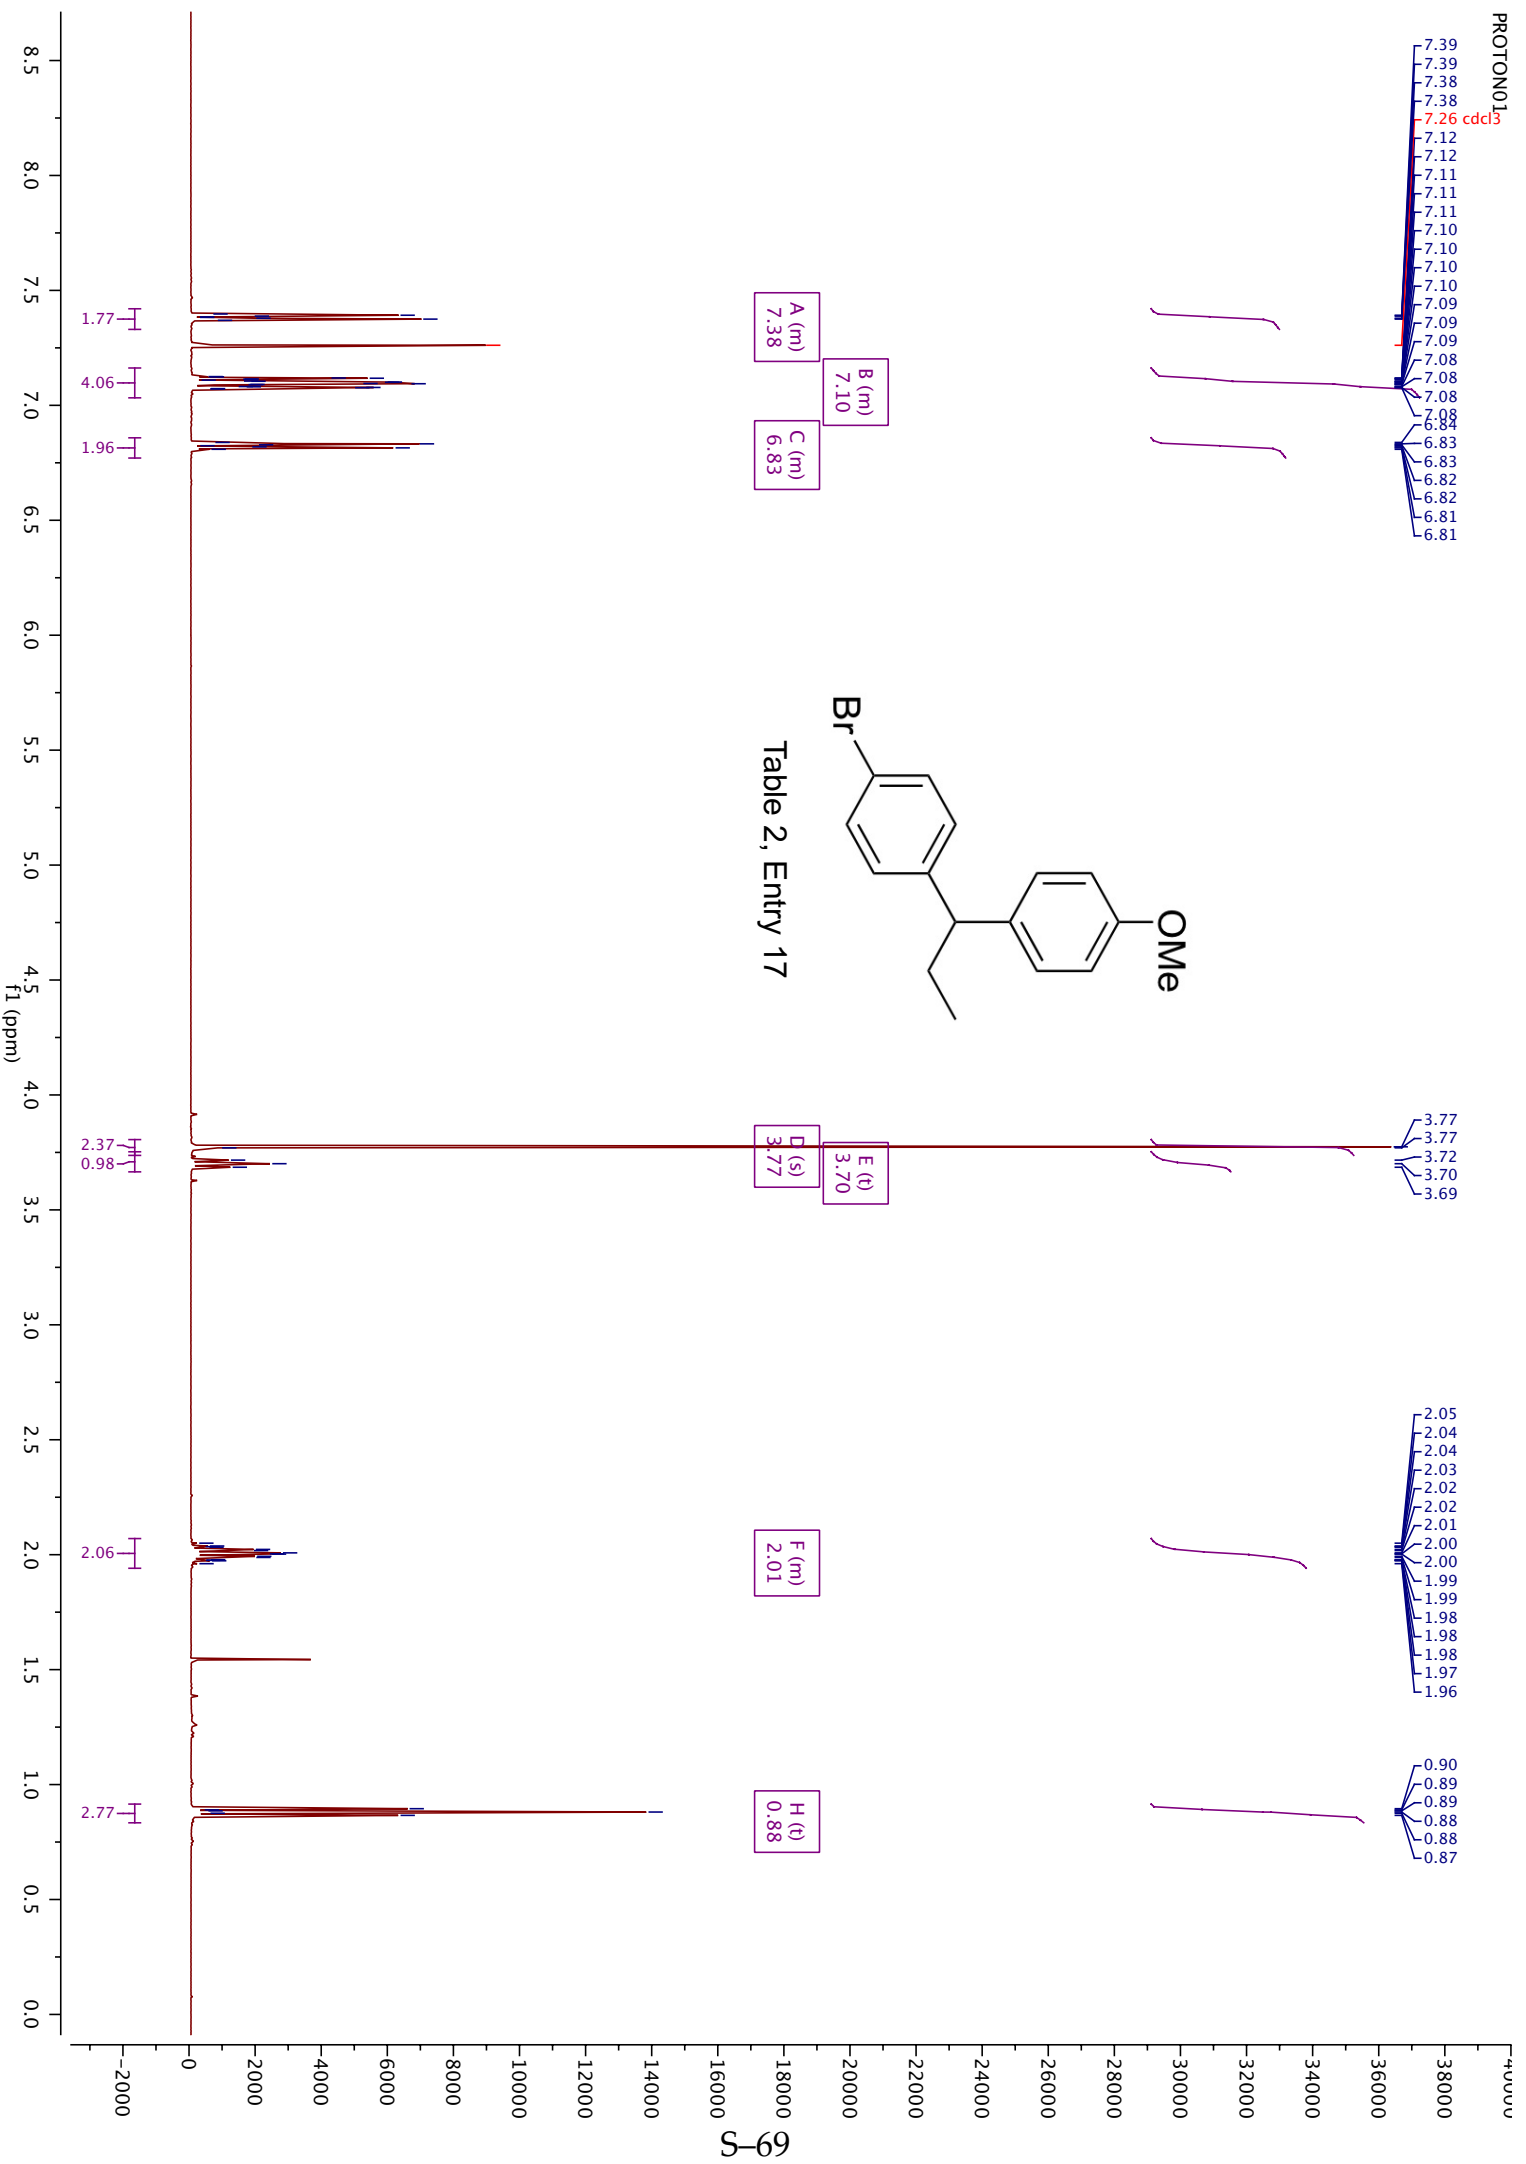

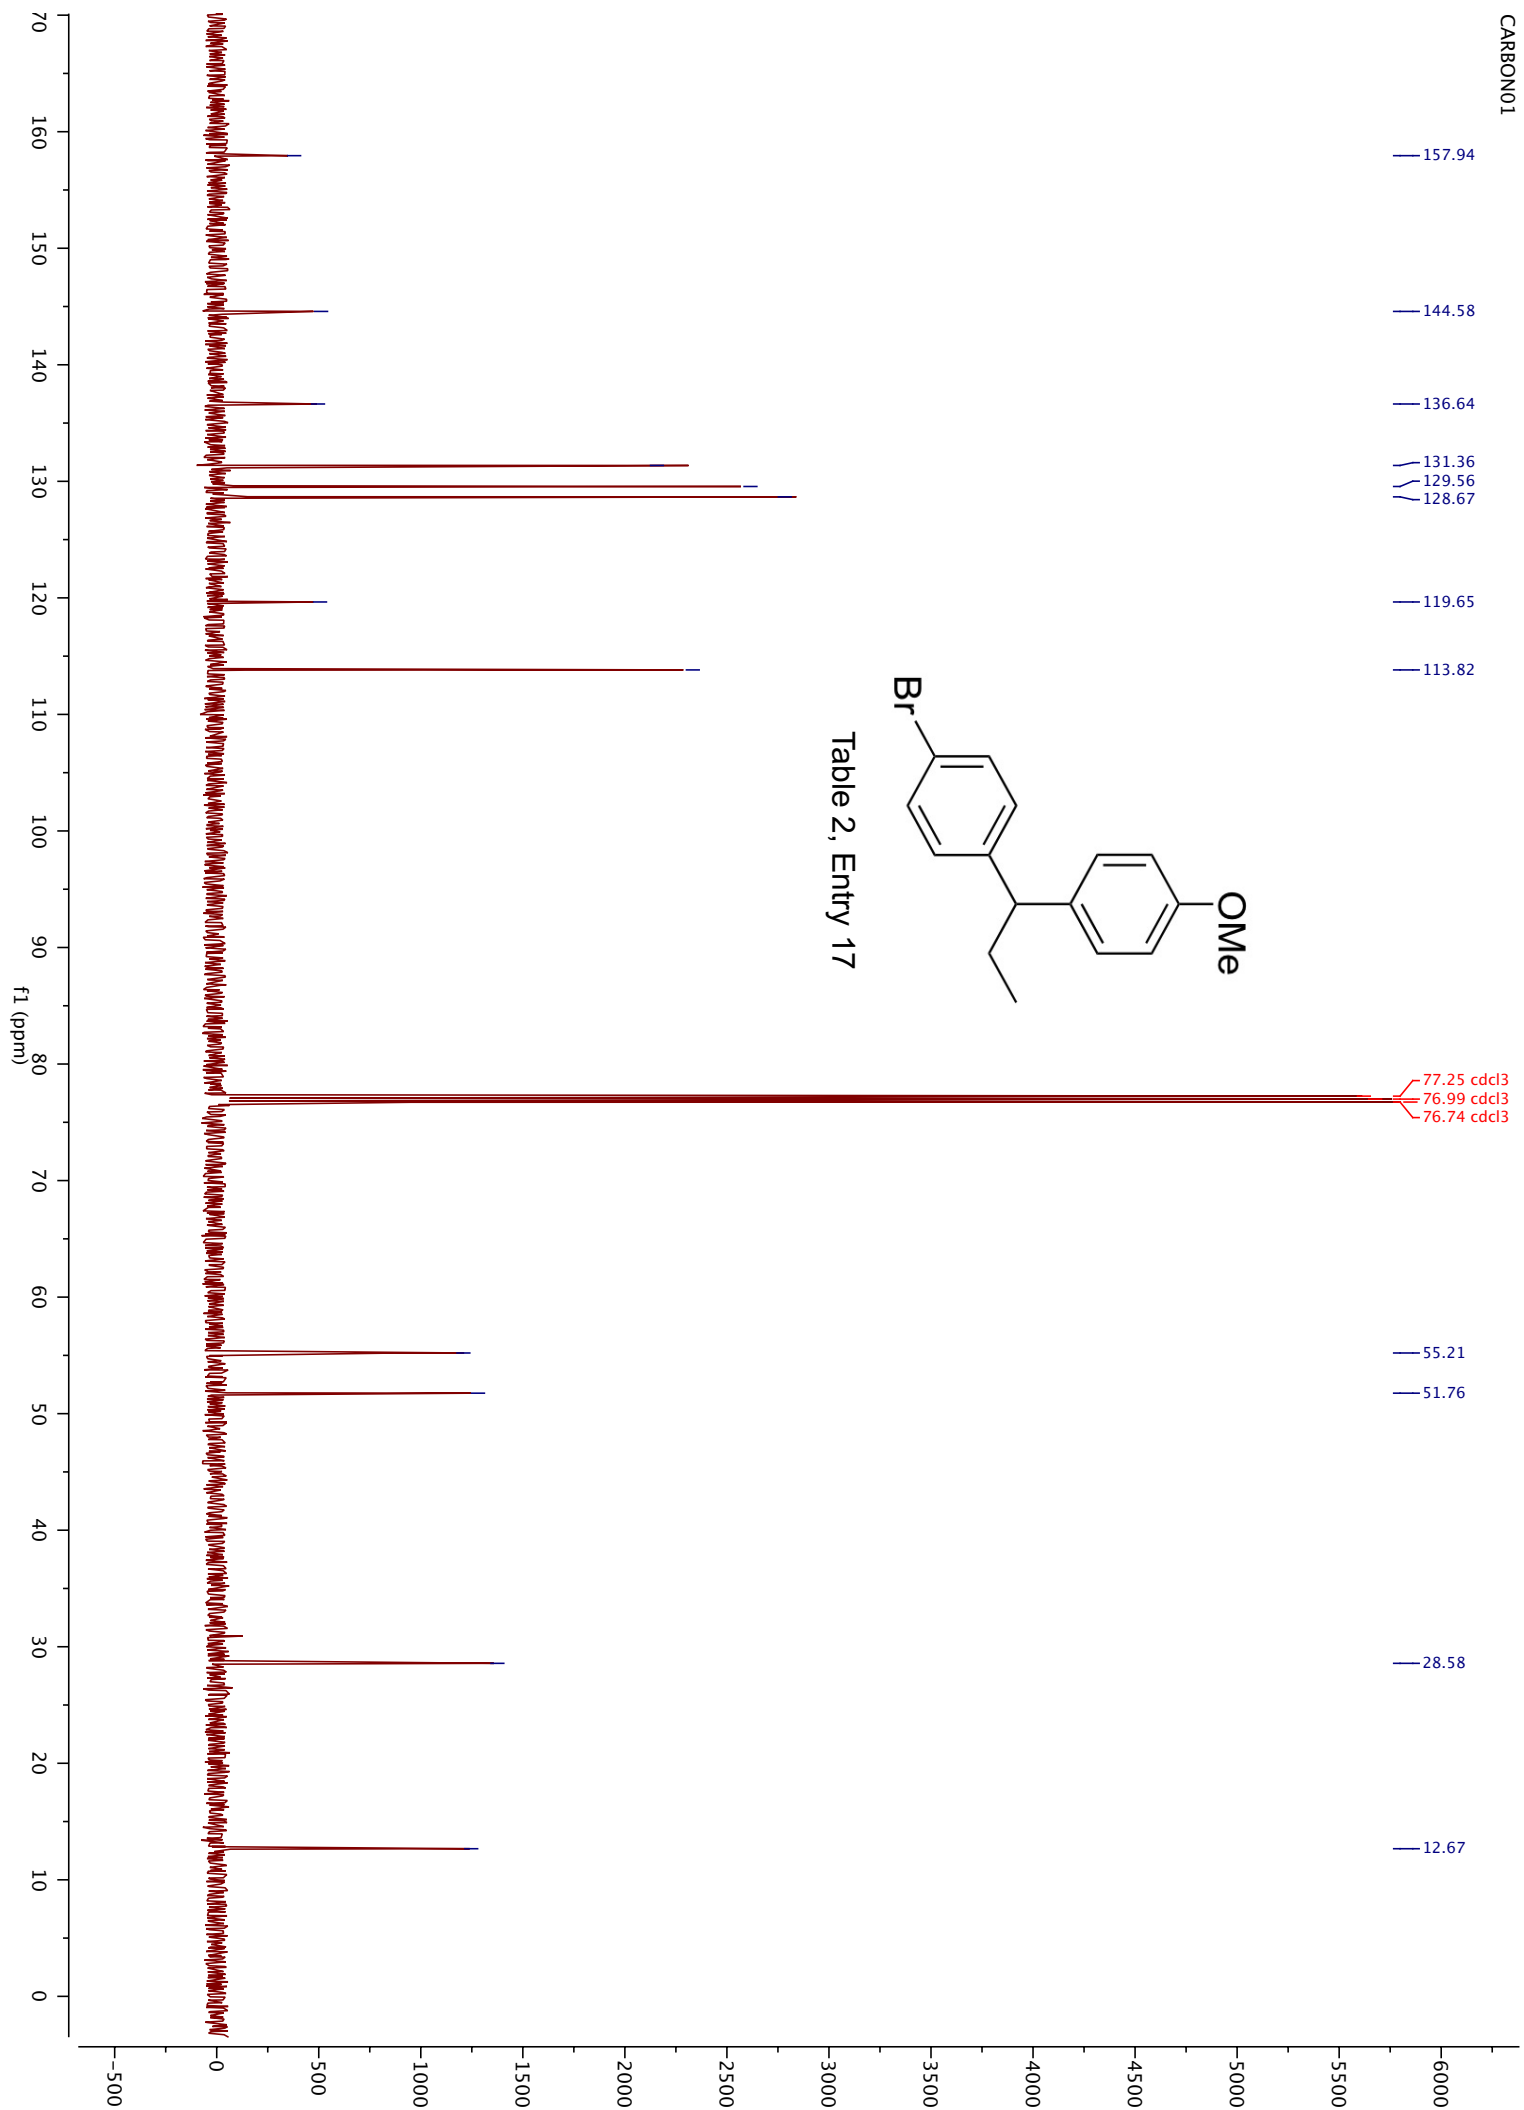

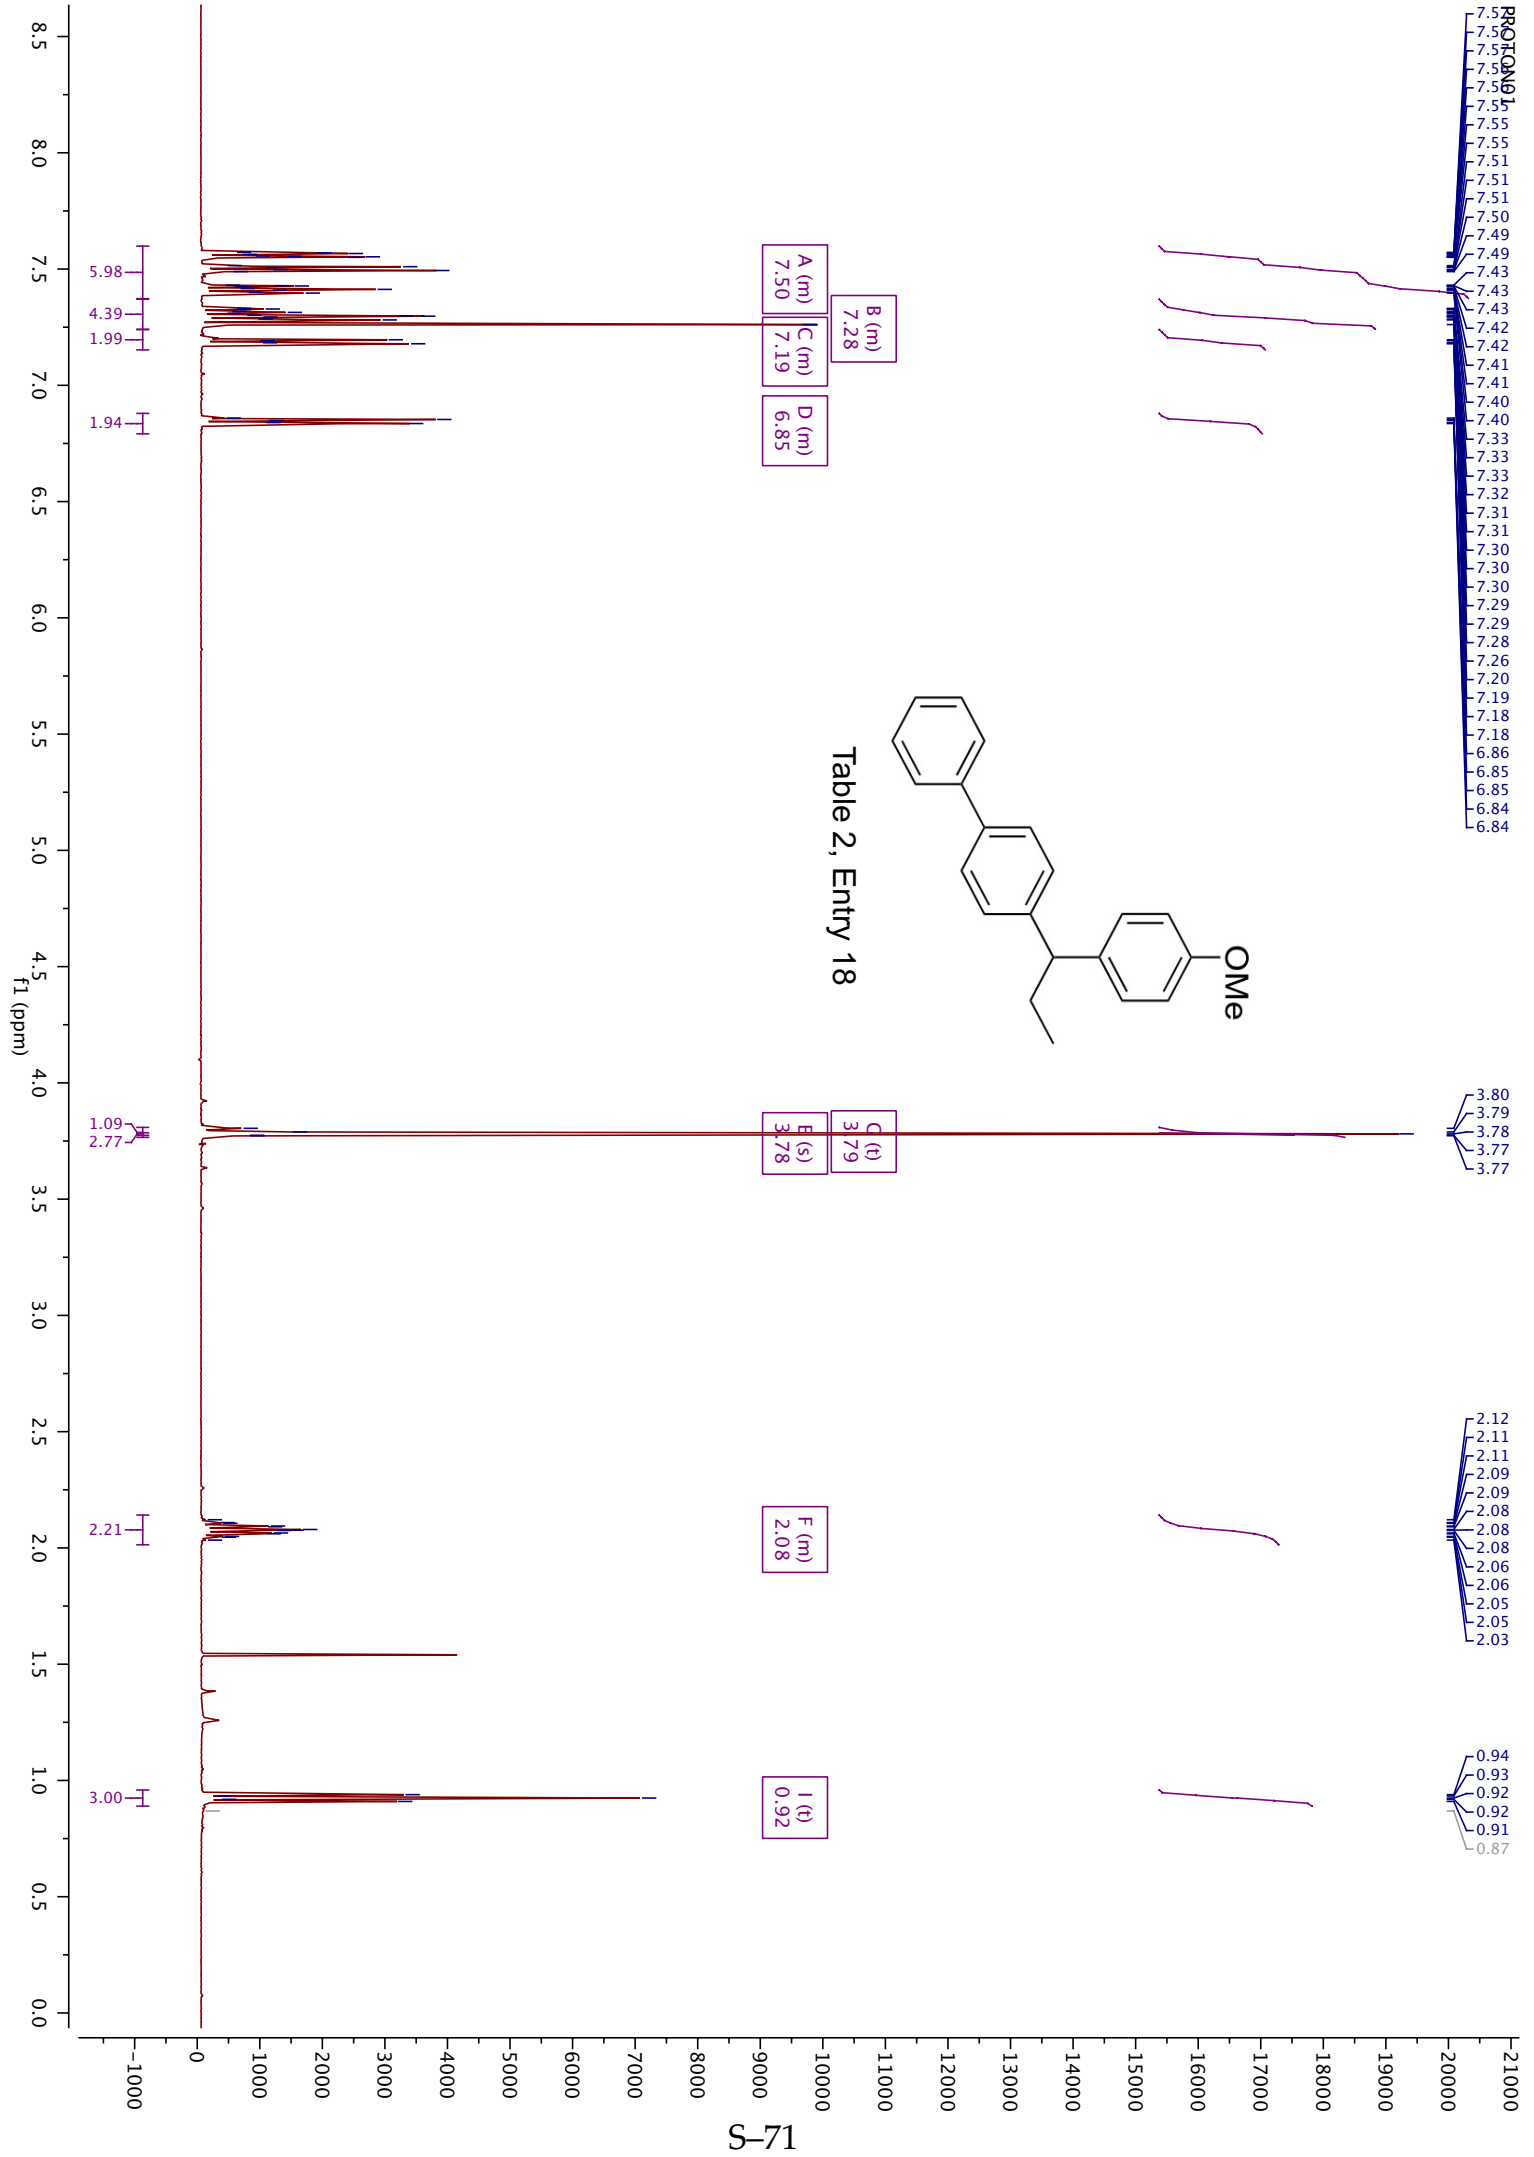

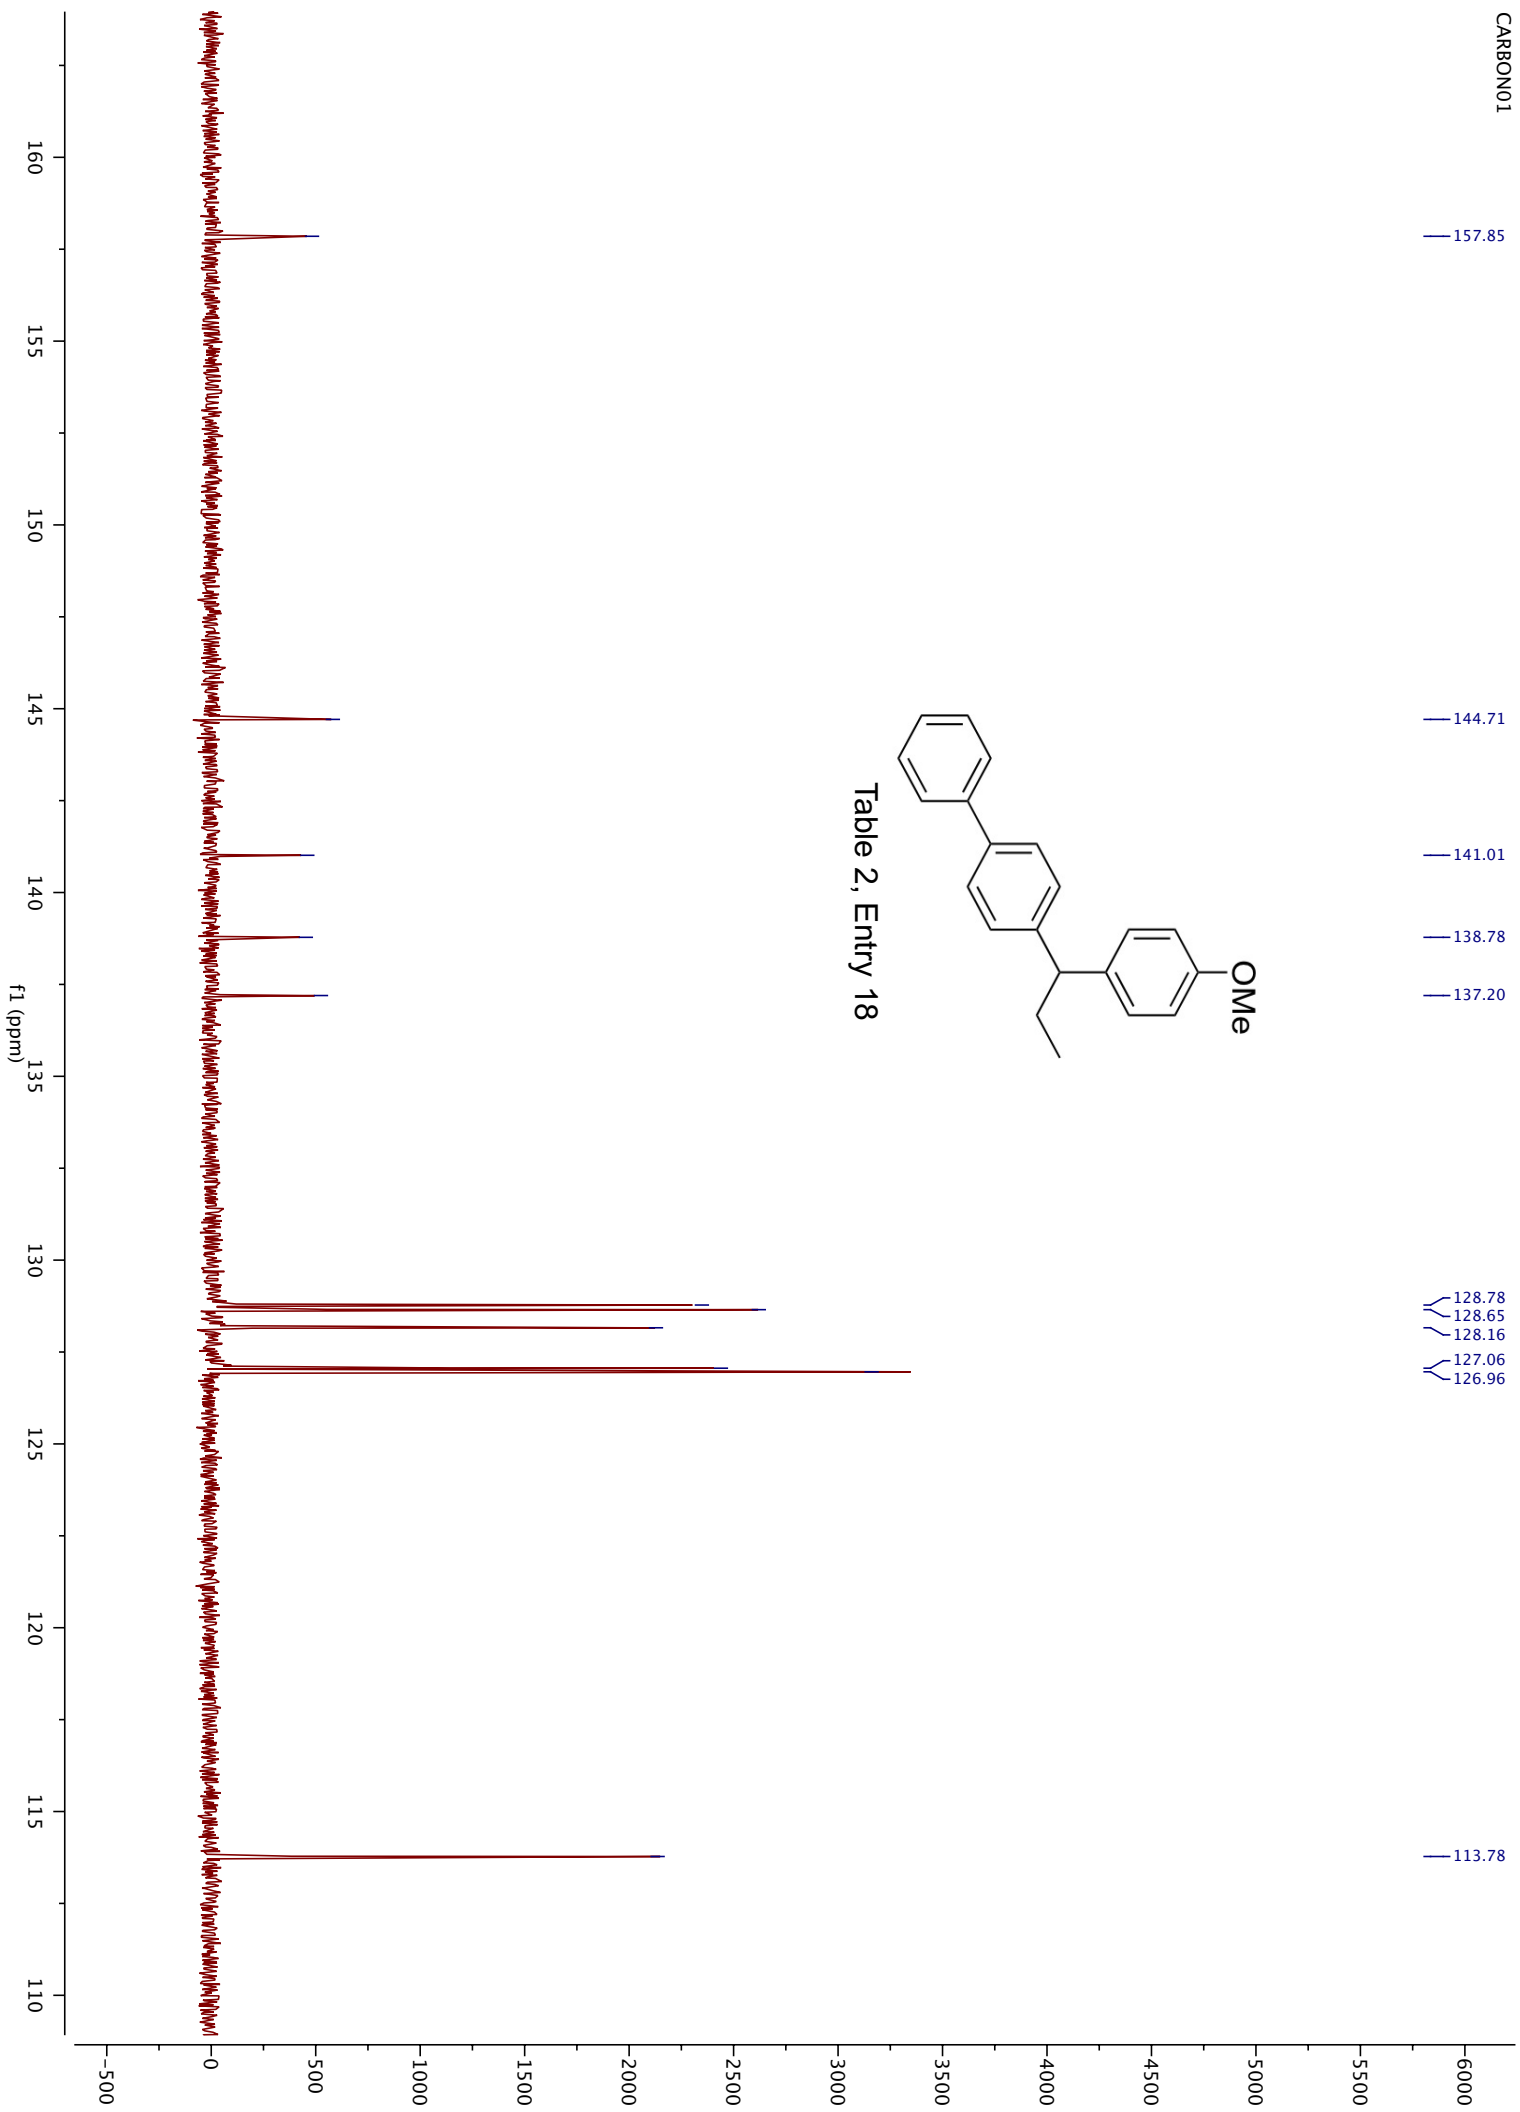



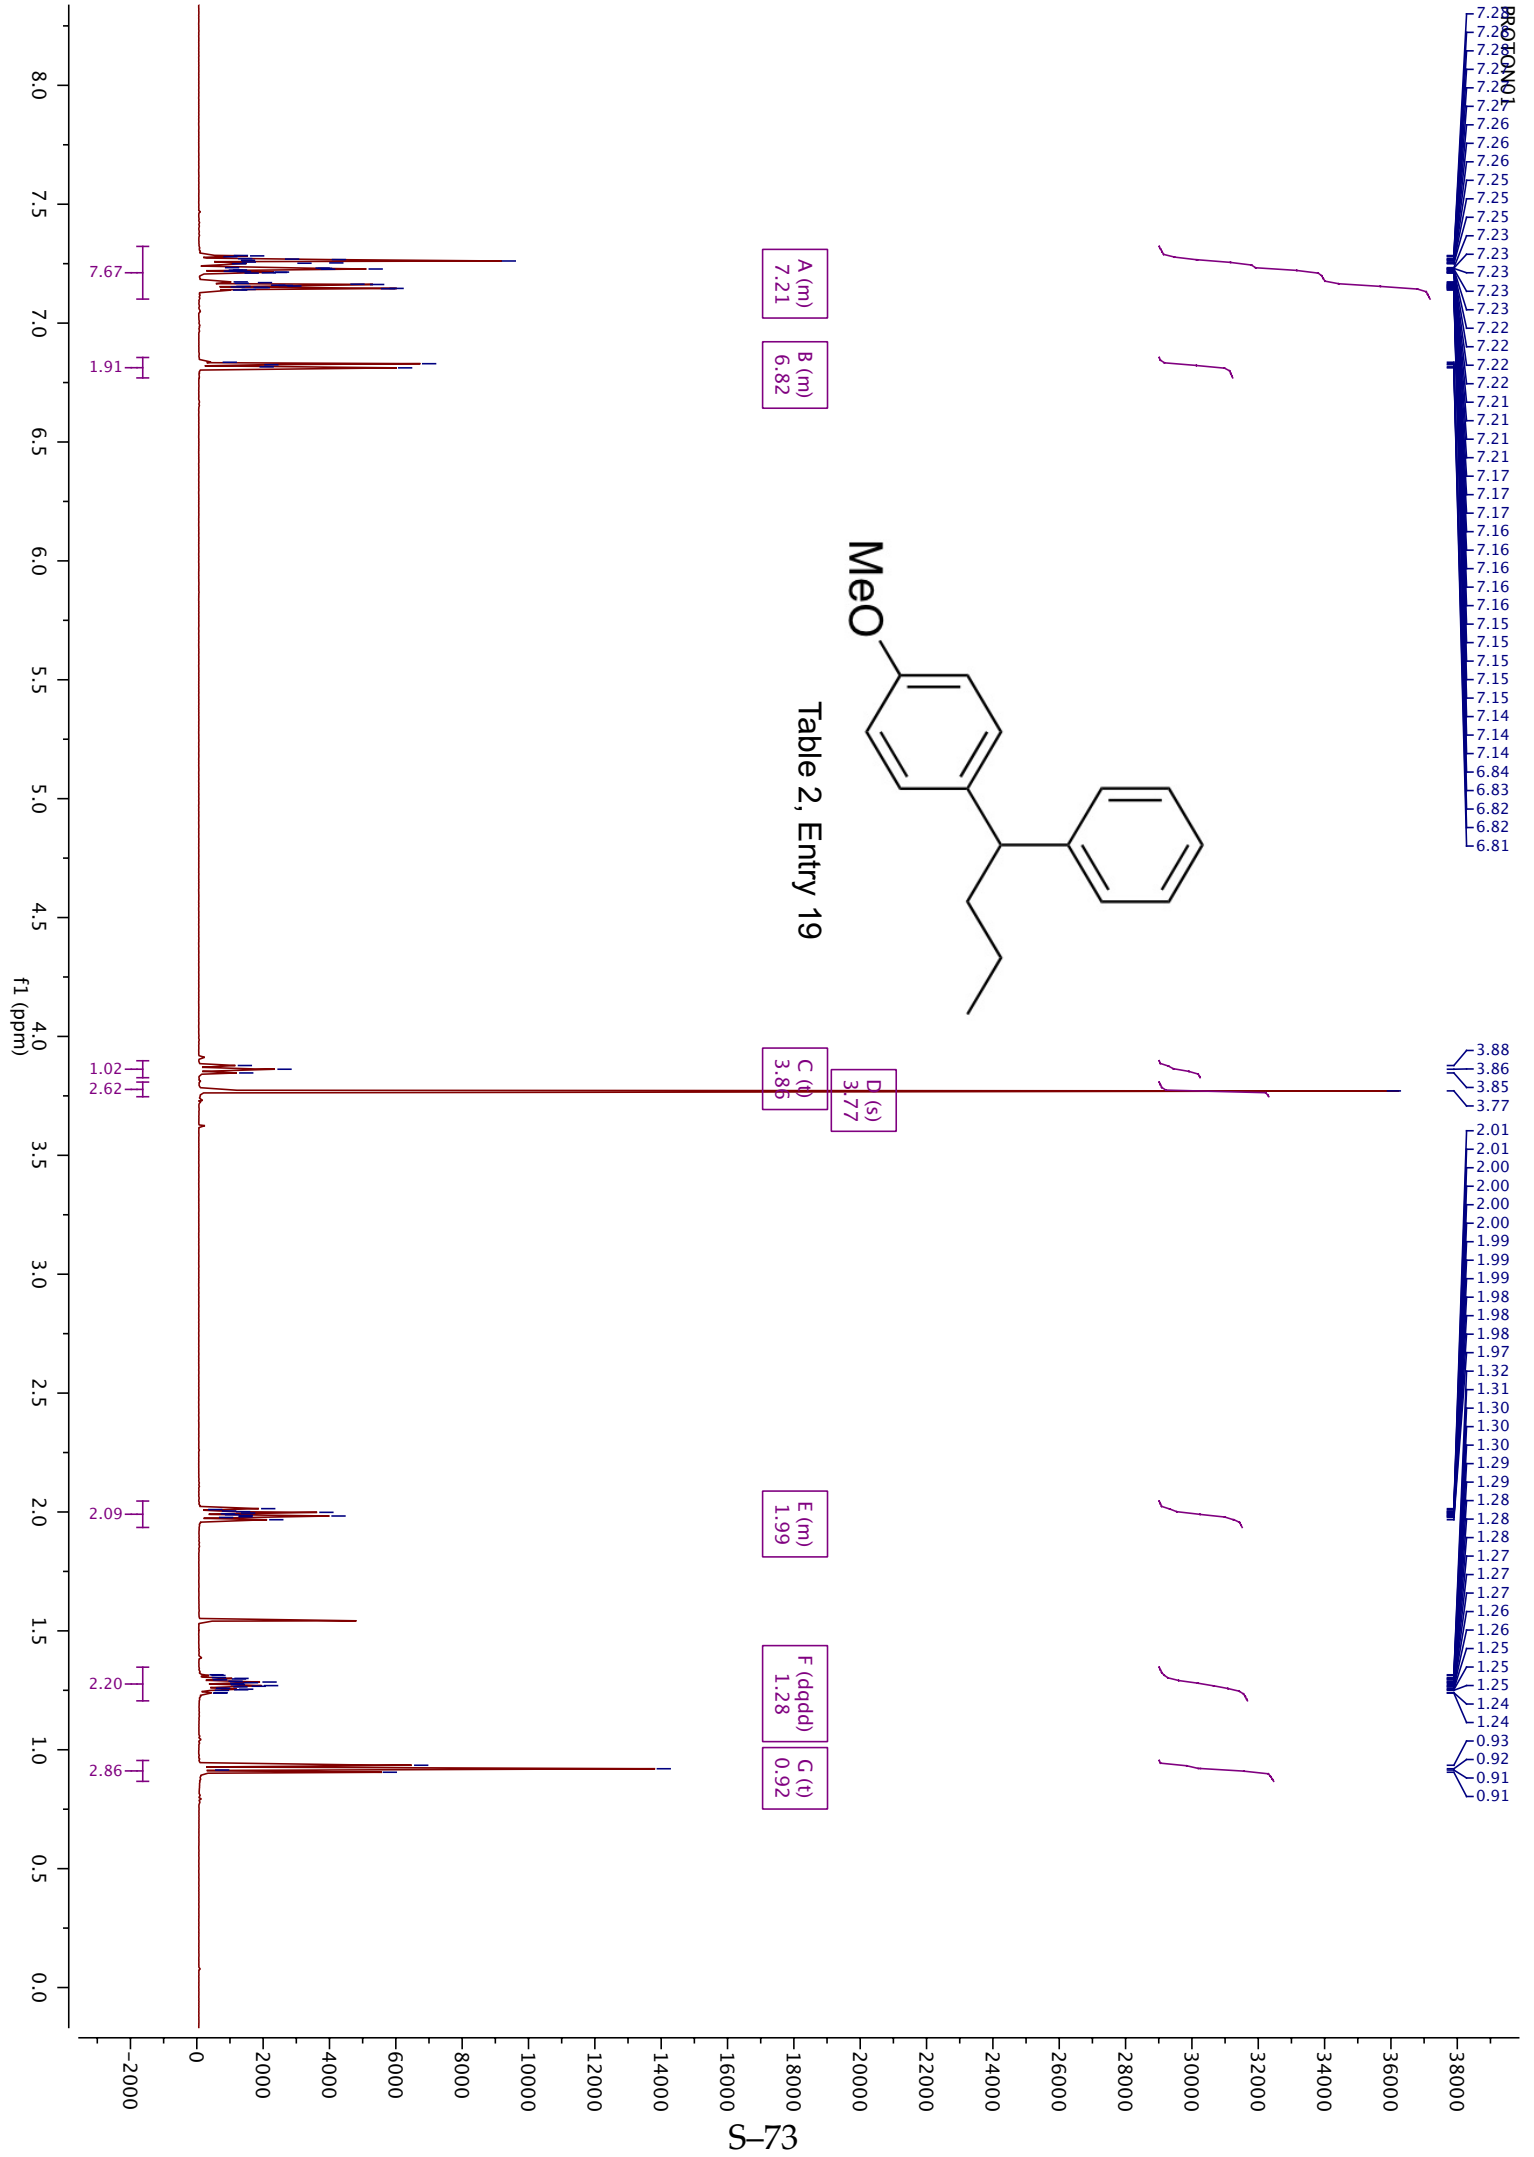

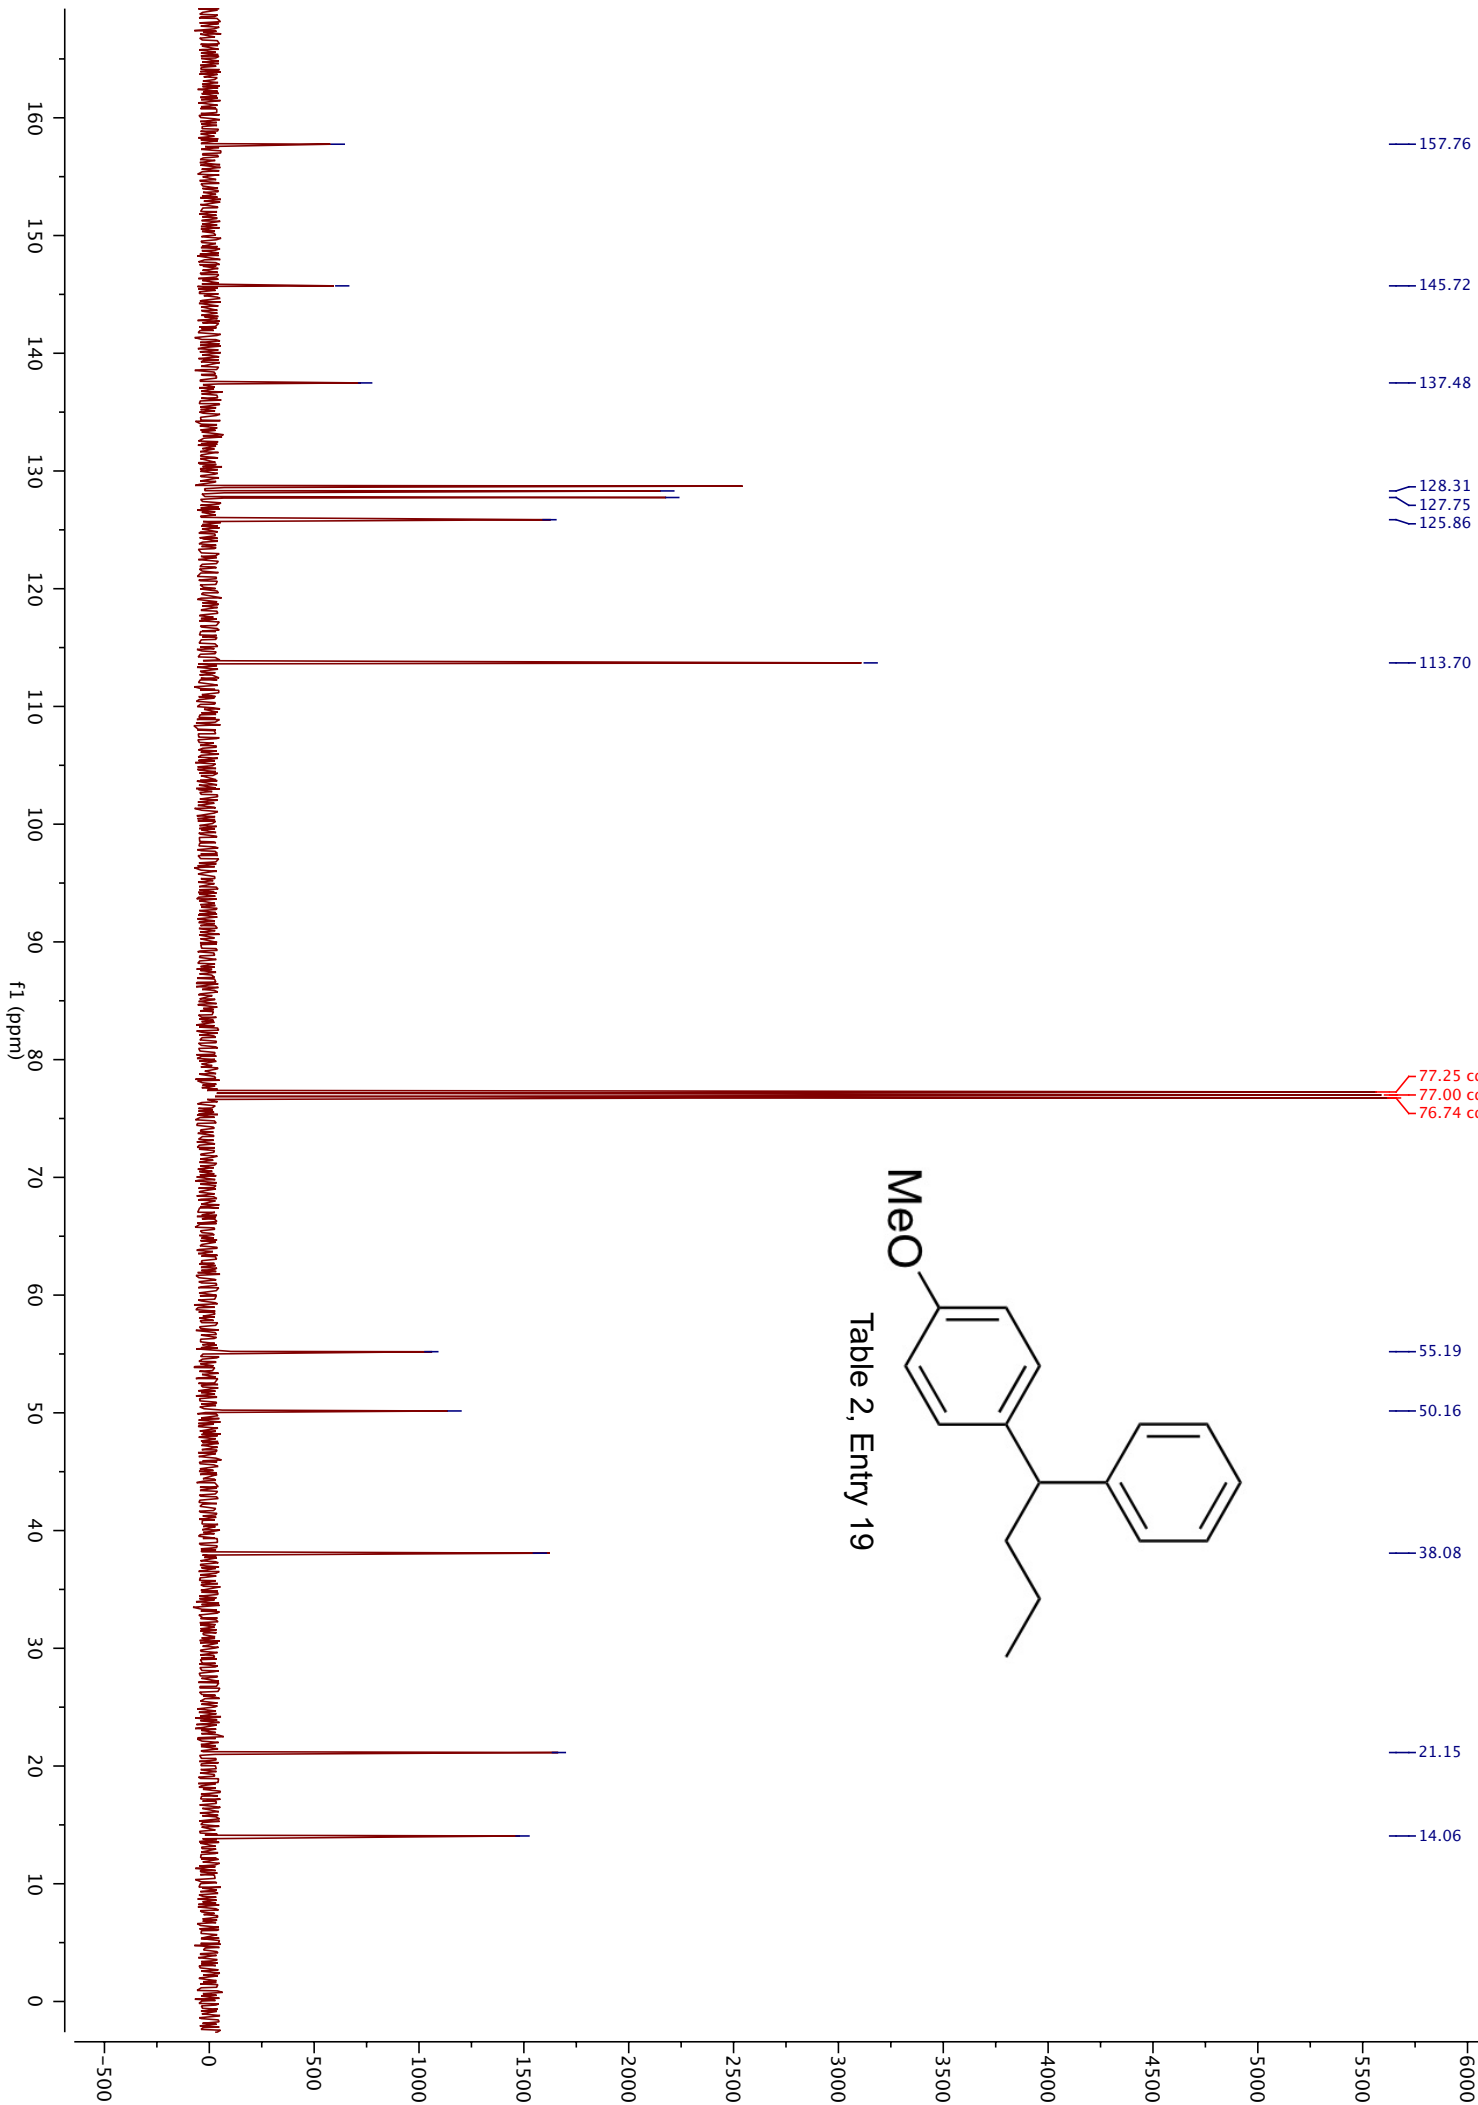

7.28  
7.28  
7.27  
7.27  
7.27  
7.26  
7.26  
7.25  
7.25  
7.25  
7.24  
7.24  
7.24  
7.23  
7.23  
7.23  
7.22  
7.22  
7.22  
7.22  
7.21  
7.21  
7.21  
7.21  
7.20  
7.20  
7.18  
7.18  
7.18  
7.17  
7.17  
7.16  
7.16  
7.15  
7.15  
6.98  
6.97  
6.96  
6.95  
6.95

3.92  
3.91  
3.89

2.03  
2.03  
2.02  
2.01  
2.01  
2.01  
2.01  
2.00  
2.00  
1.99  
1.99  
1.99  
1.98  
1.98  
1.33  
1.32  
1.31  
1.30  
1.29  
1.29  
1.29  
1.28  
1.28  
1.28  
1.27  
1.27  
1.26  
1.26  
1.25  
1.24  
0.93  
0.92  
0.90

-7.26 cdcl3

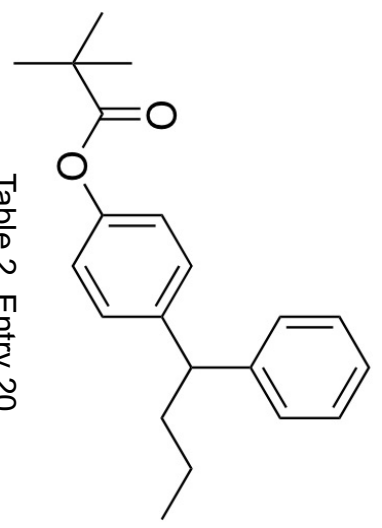

Table 2, Entry 20

A (m)  
7.22

B (m)  
6.96

C (t)  
3.91

D (m)  
2.00

C (s)  
1.33

E (m)  
1.28

F (t)  
0.92

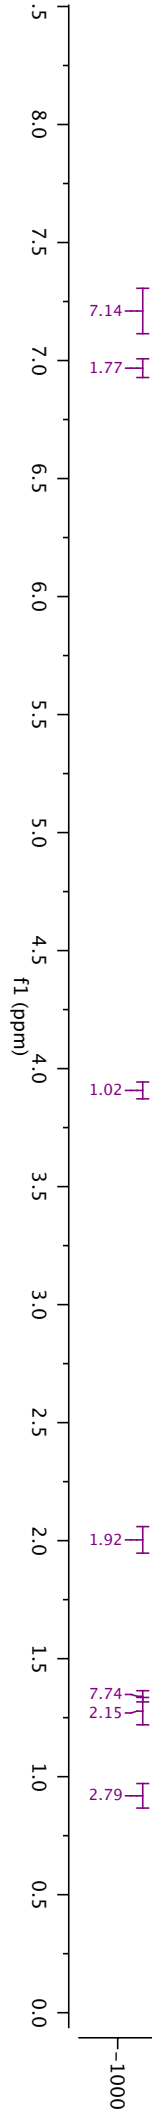

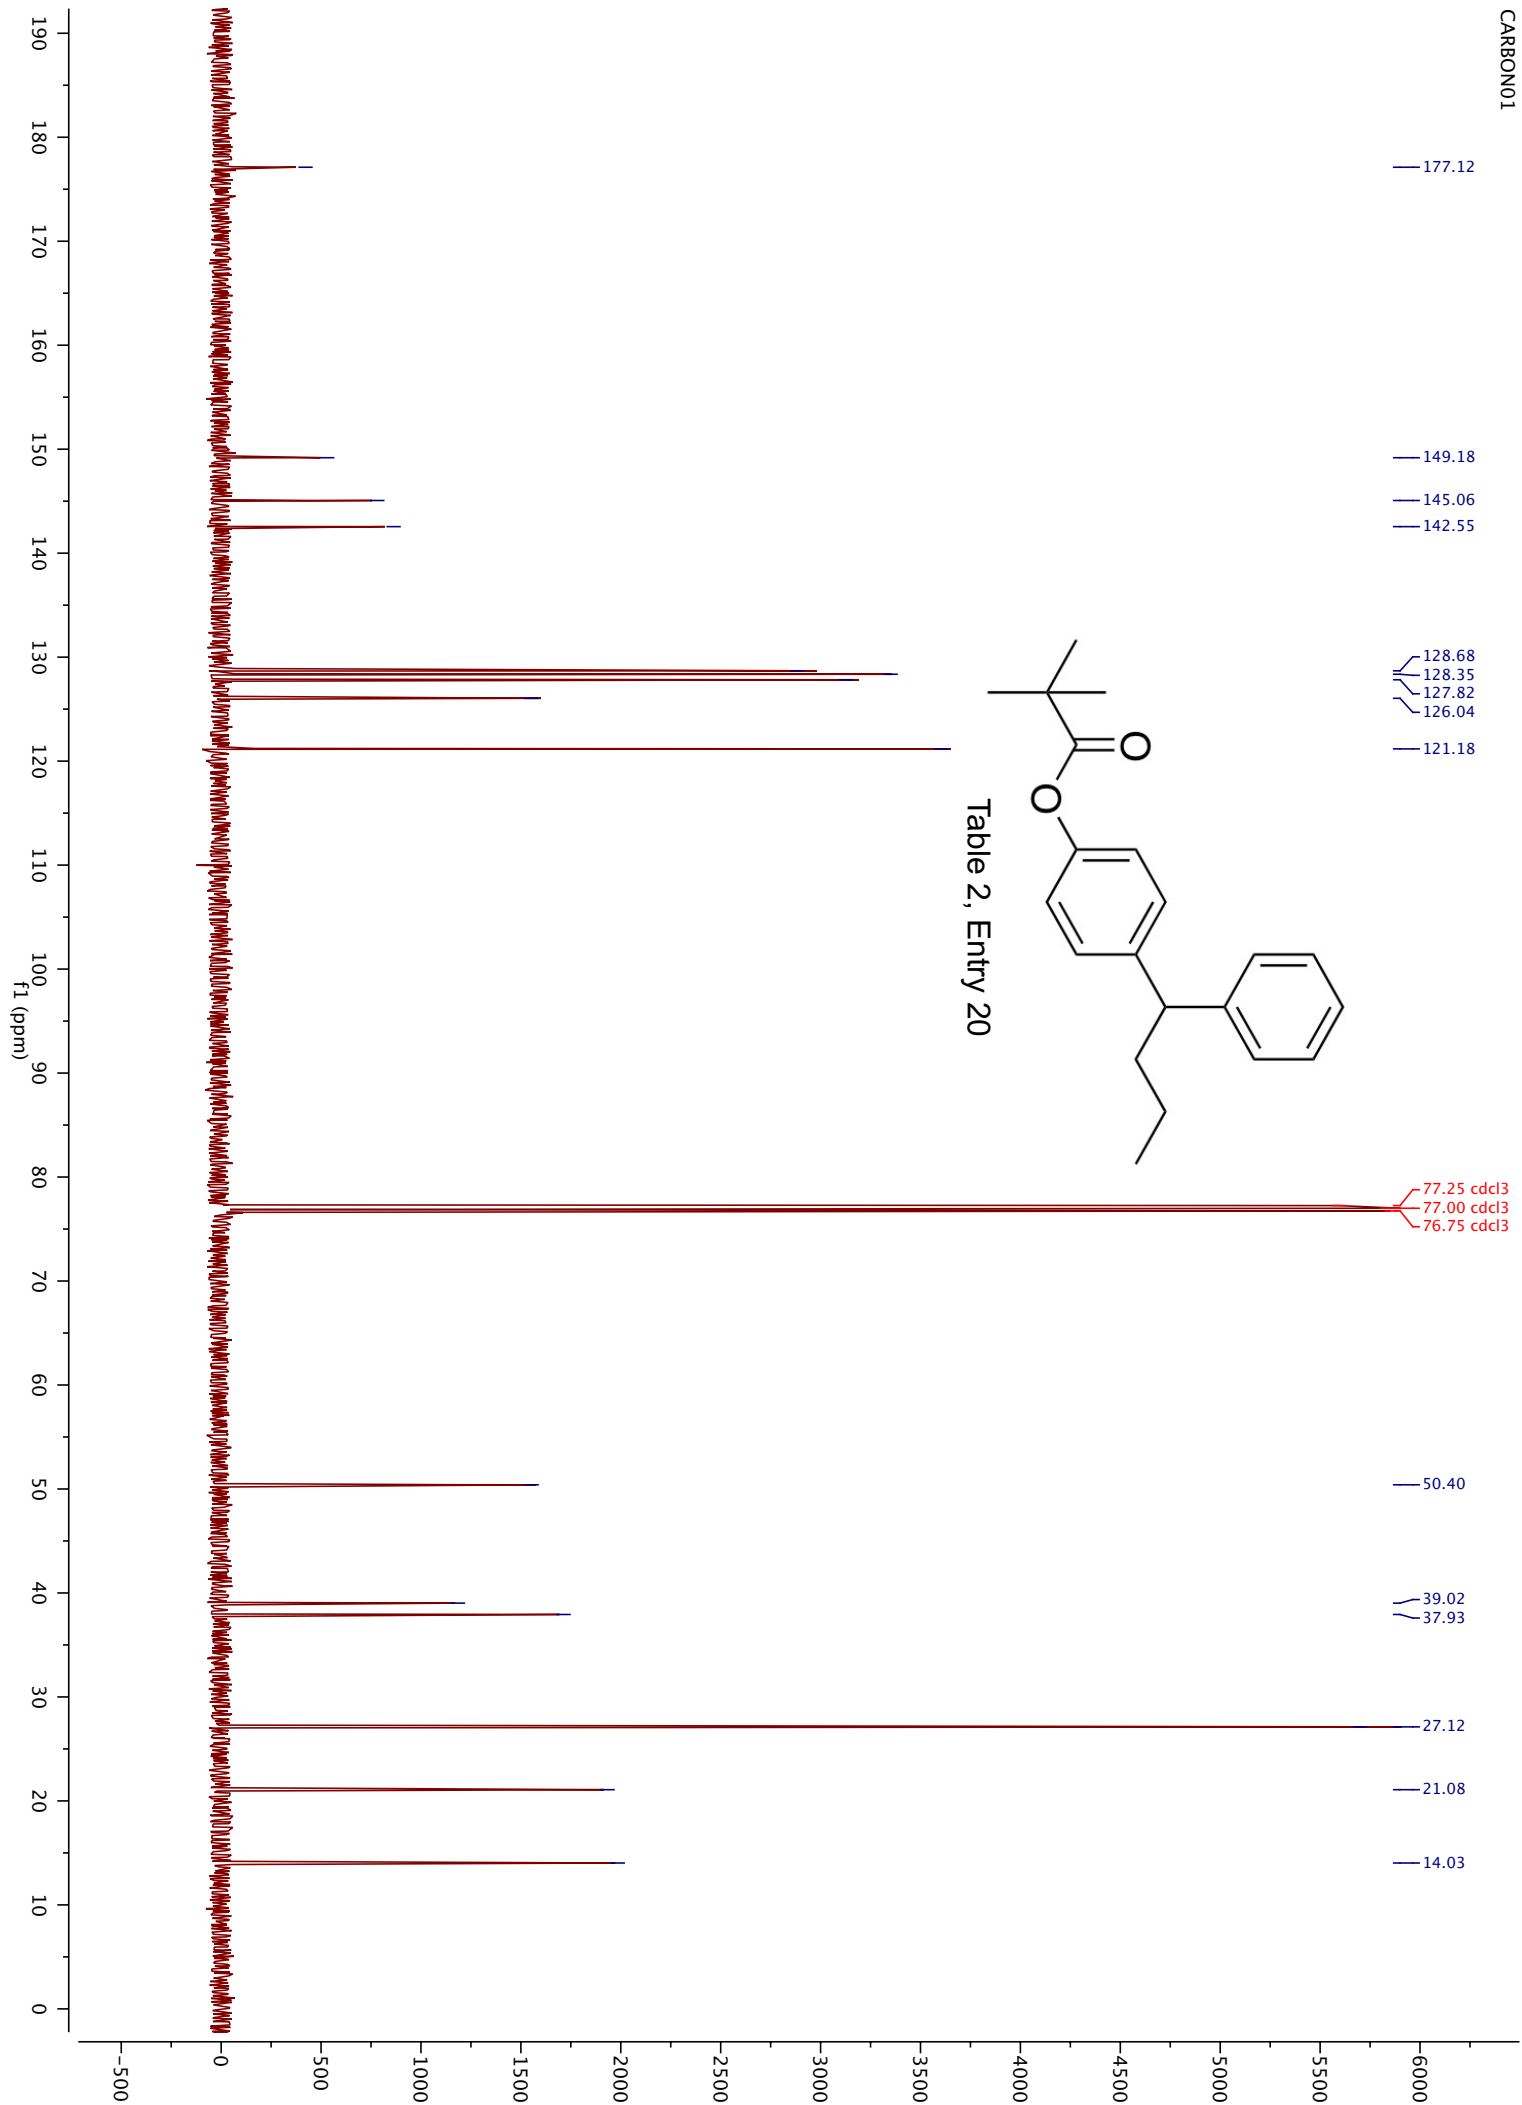

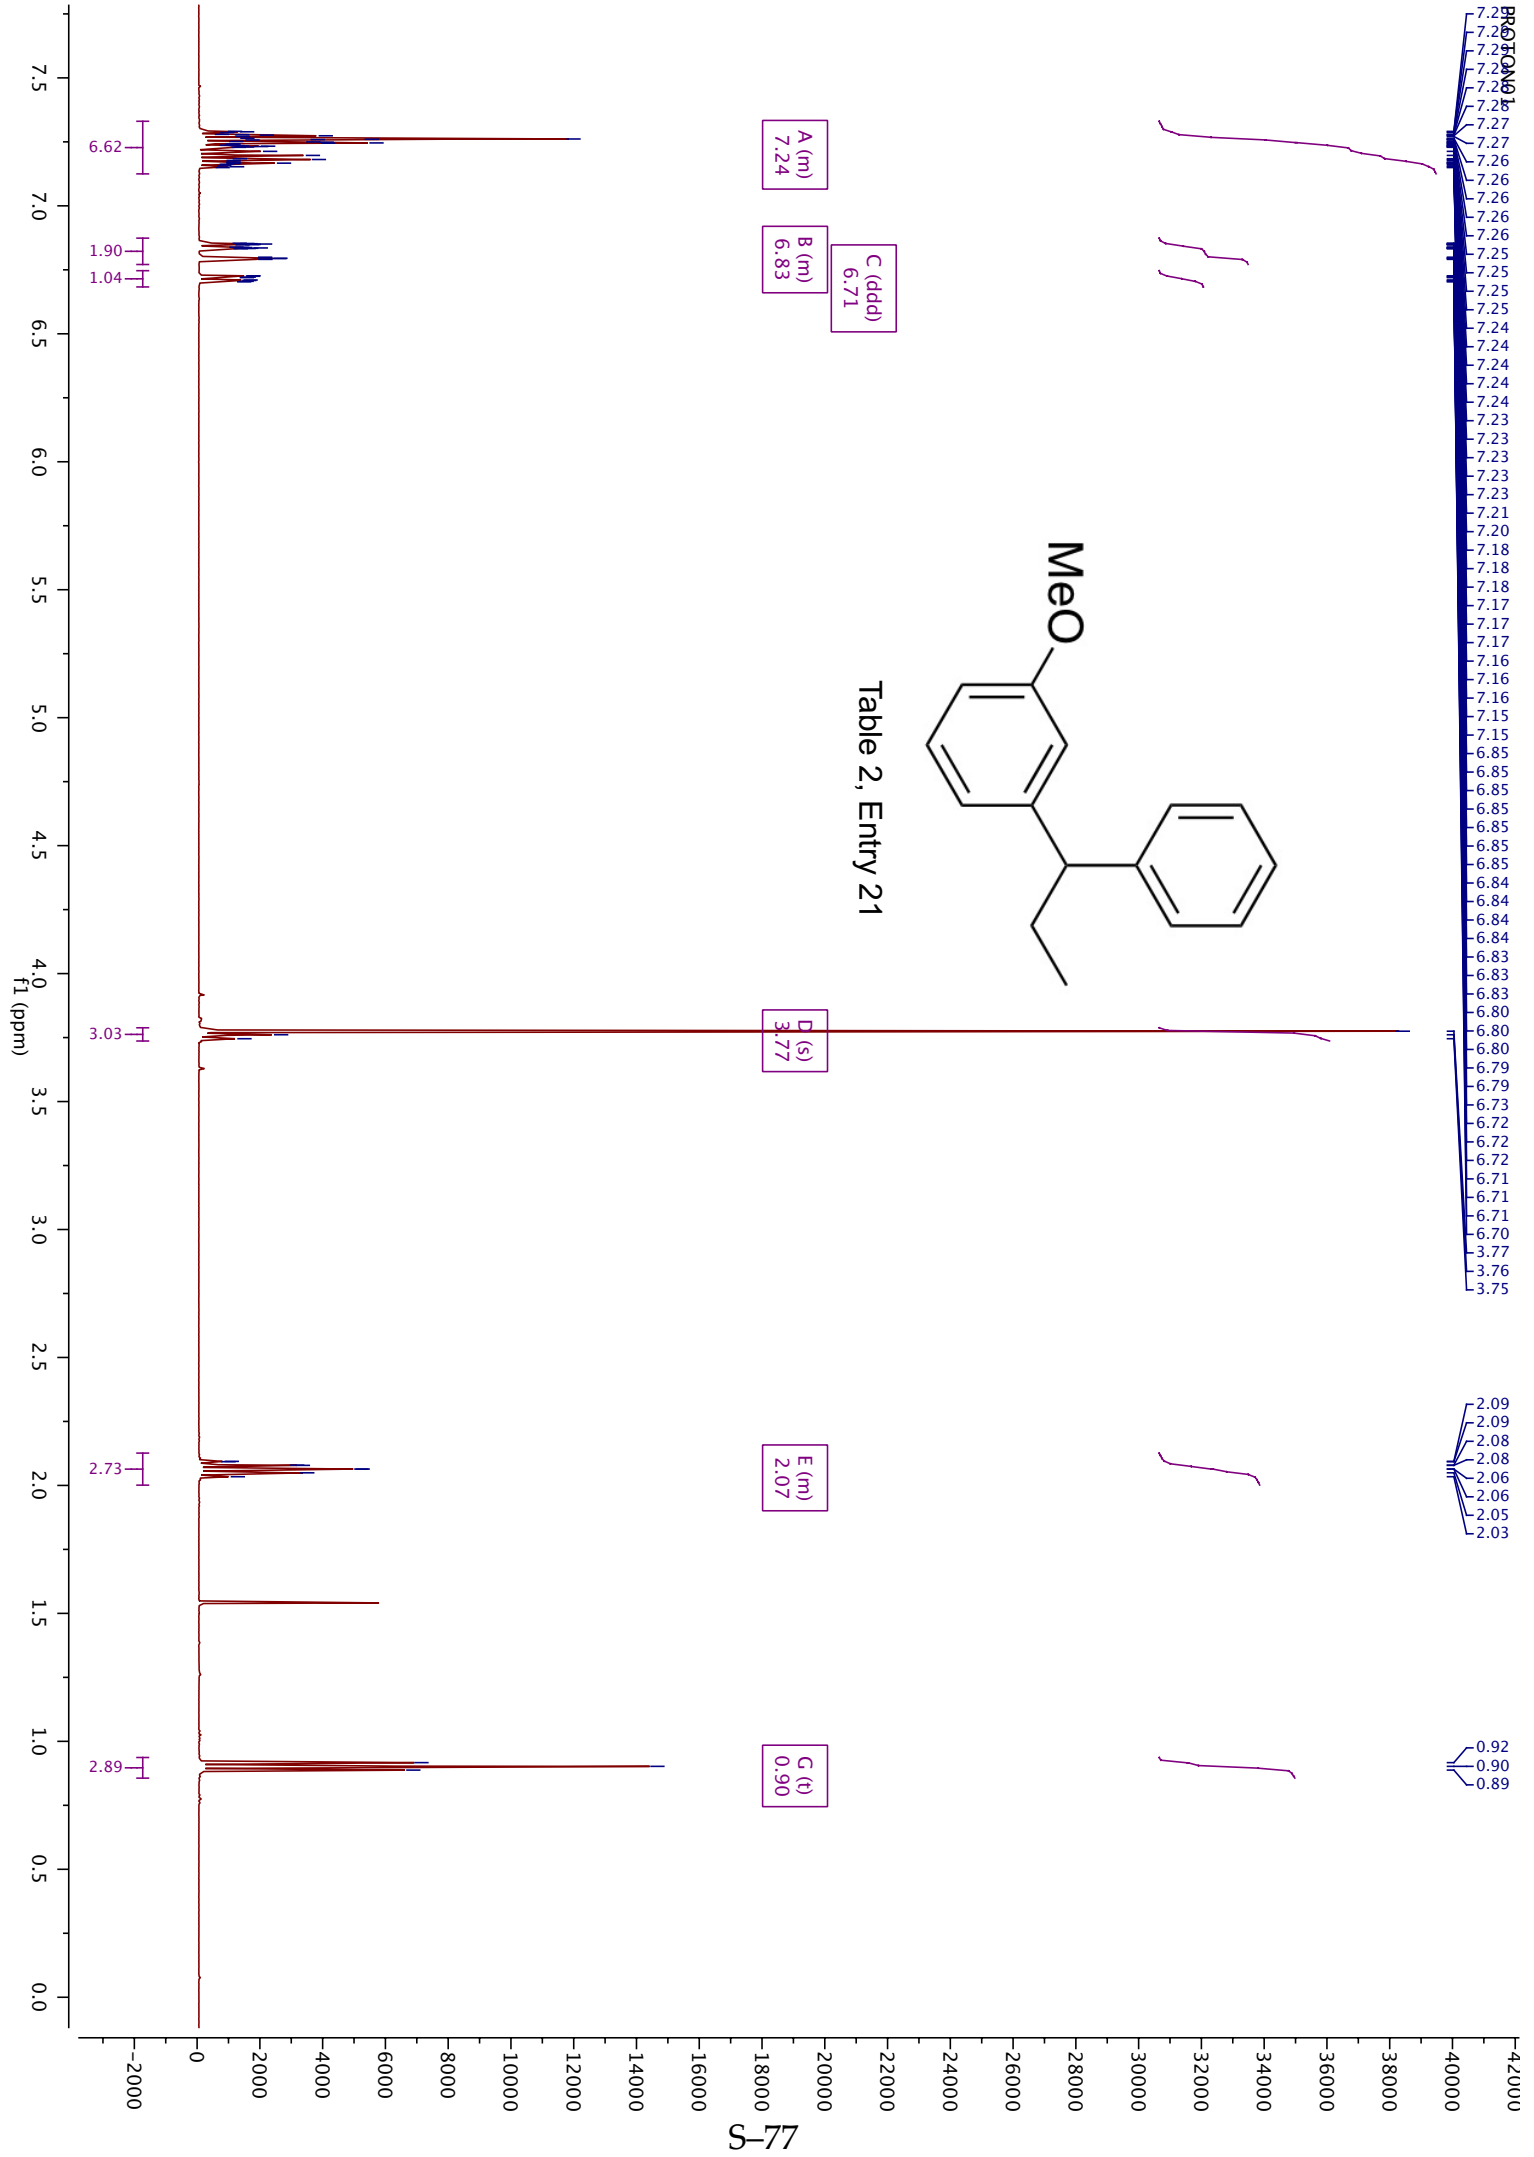

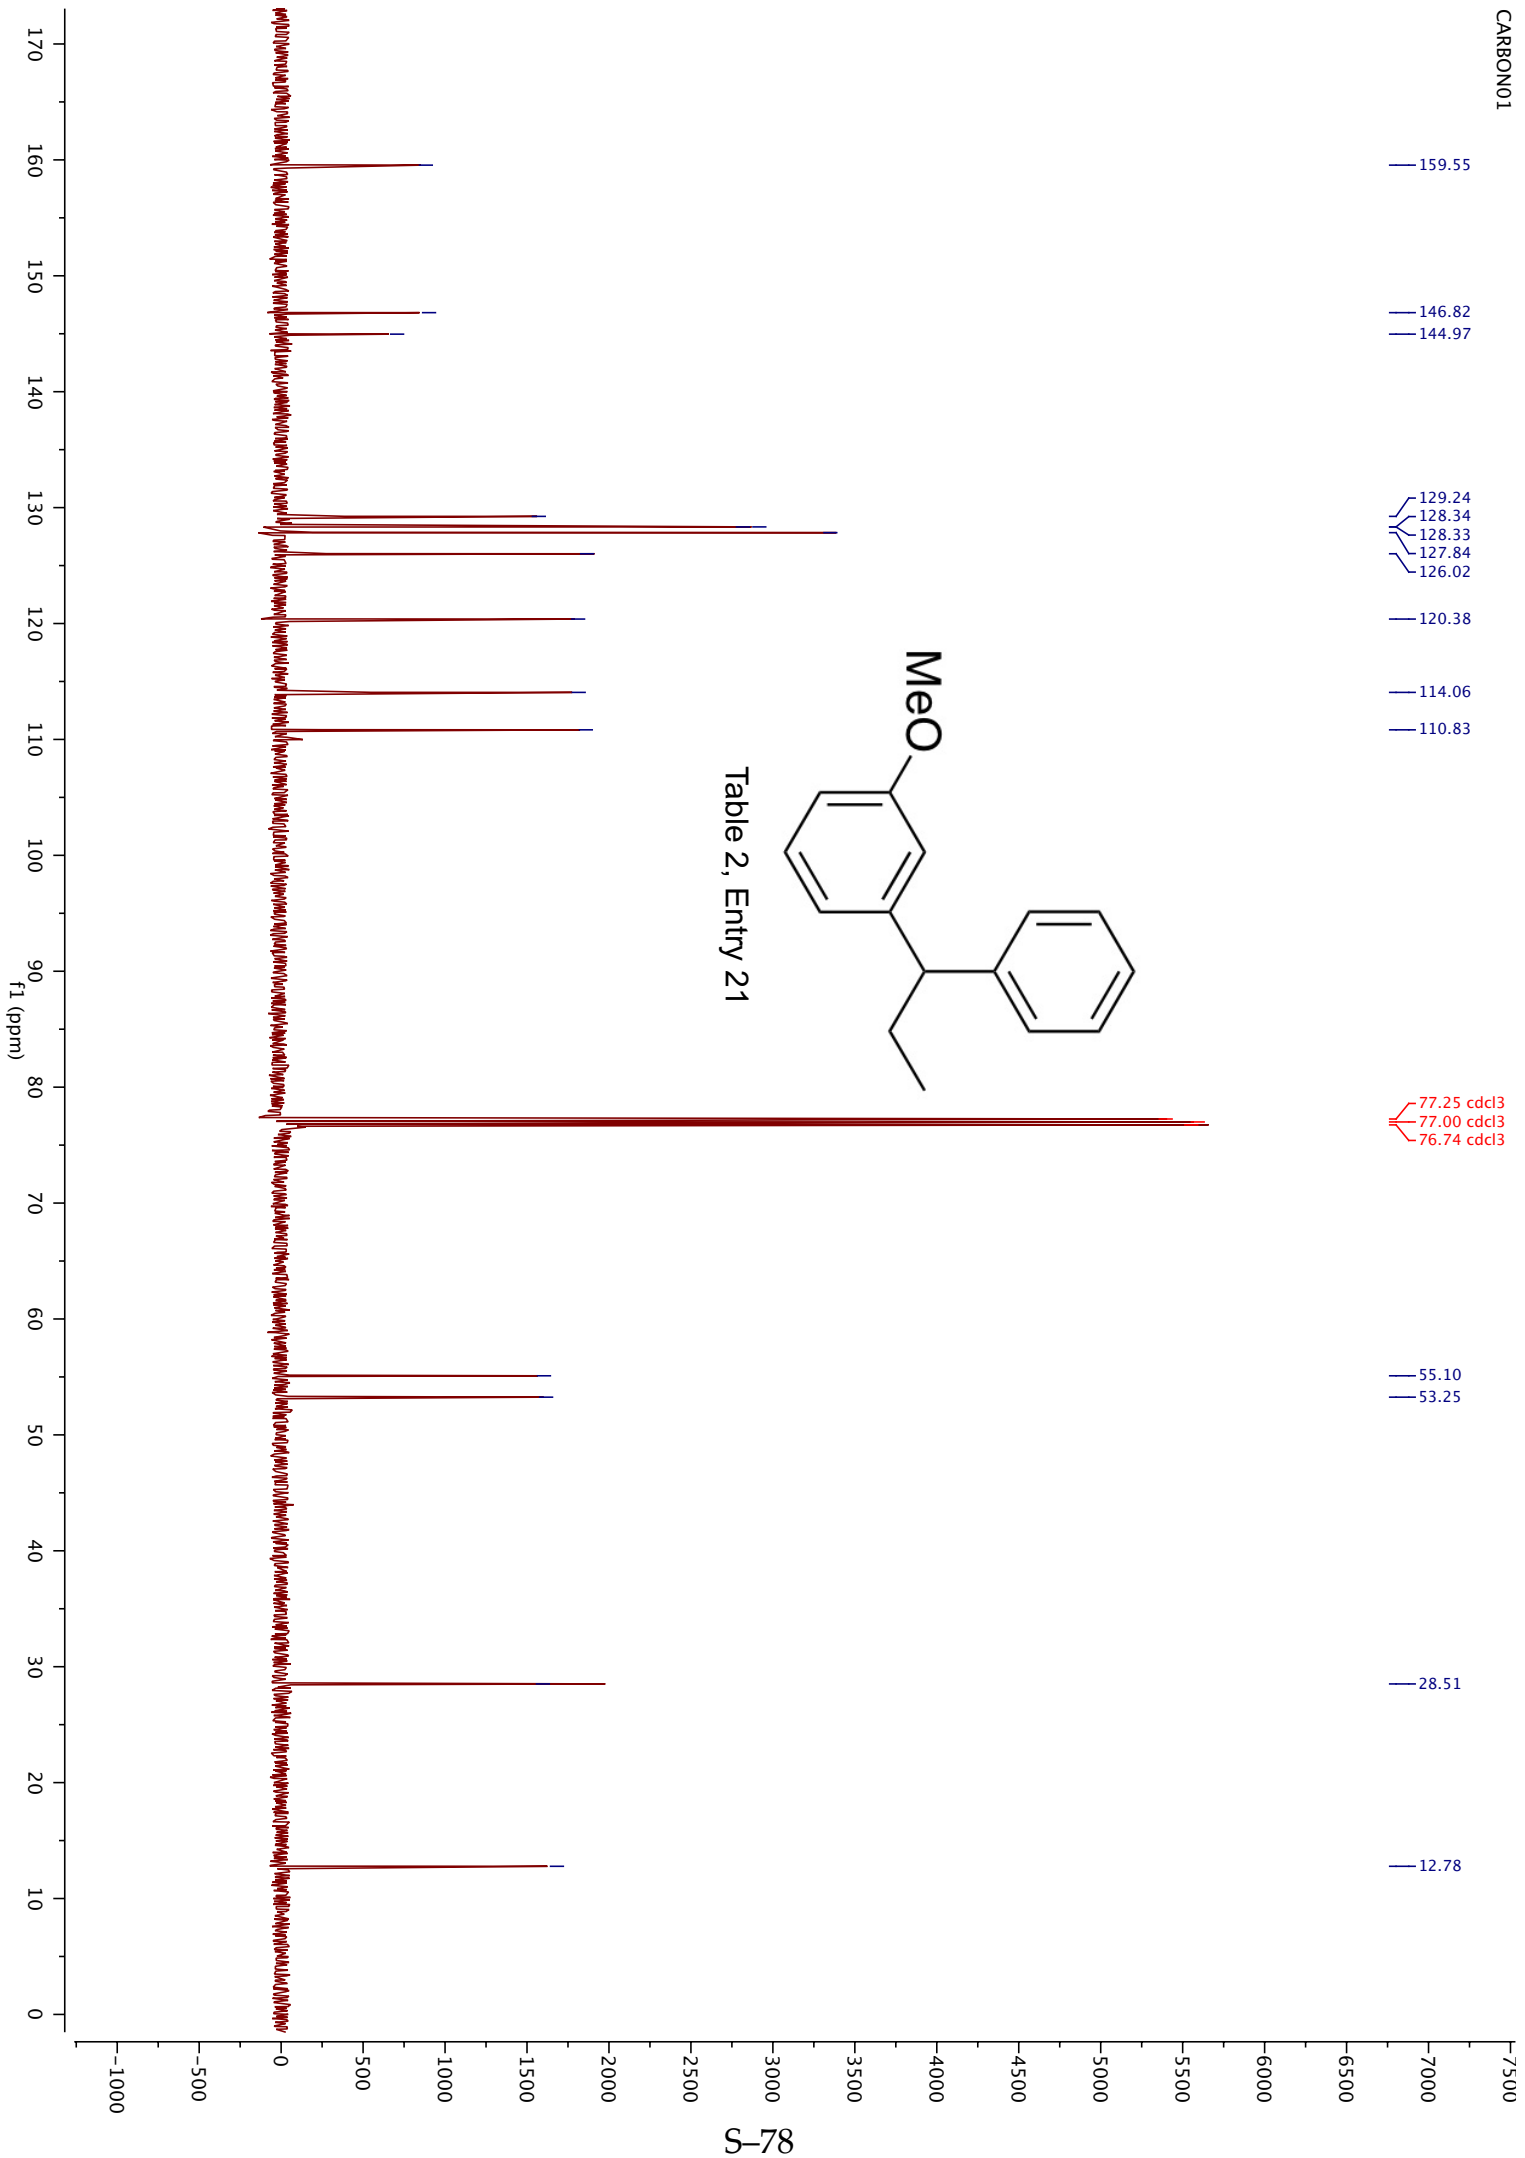

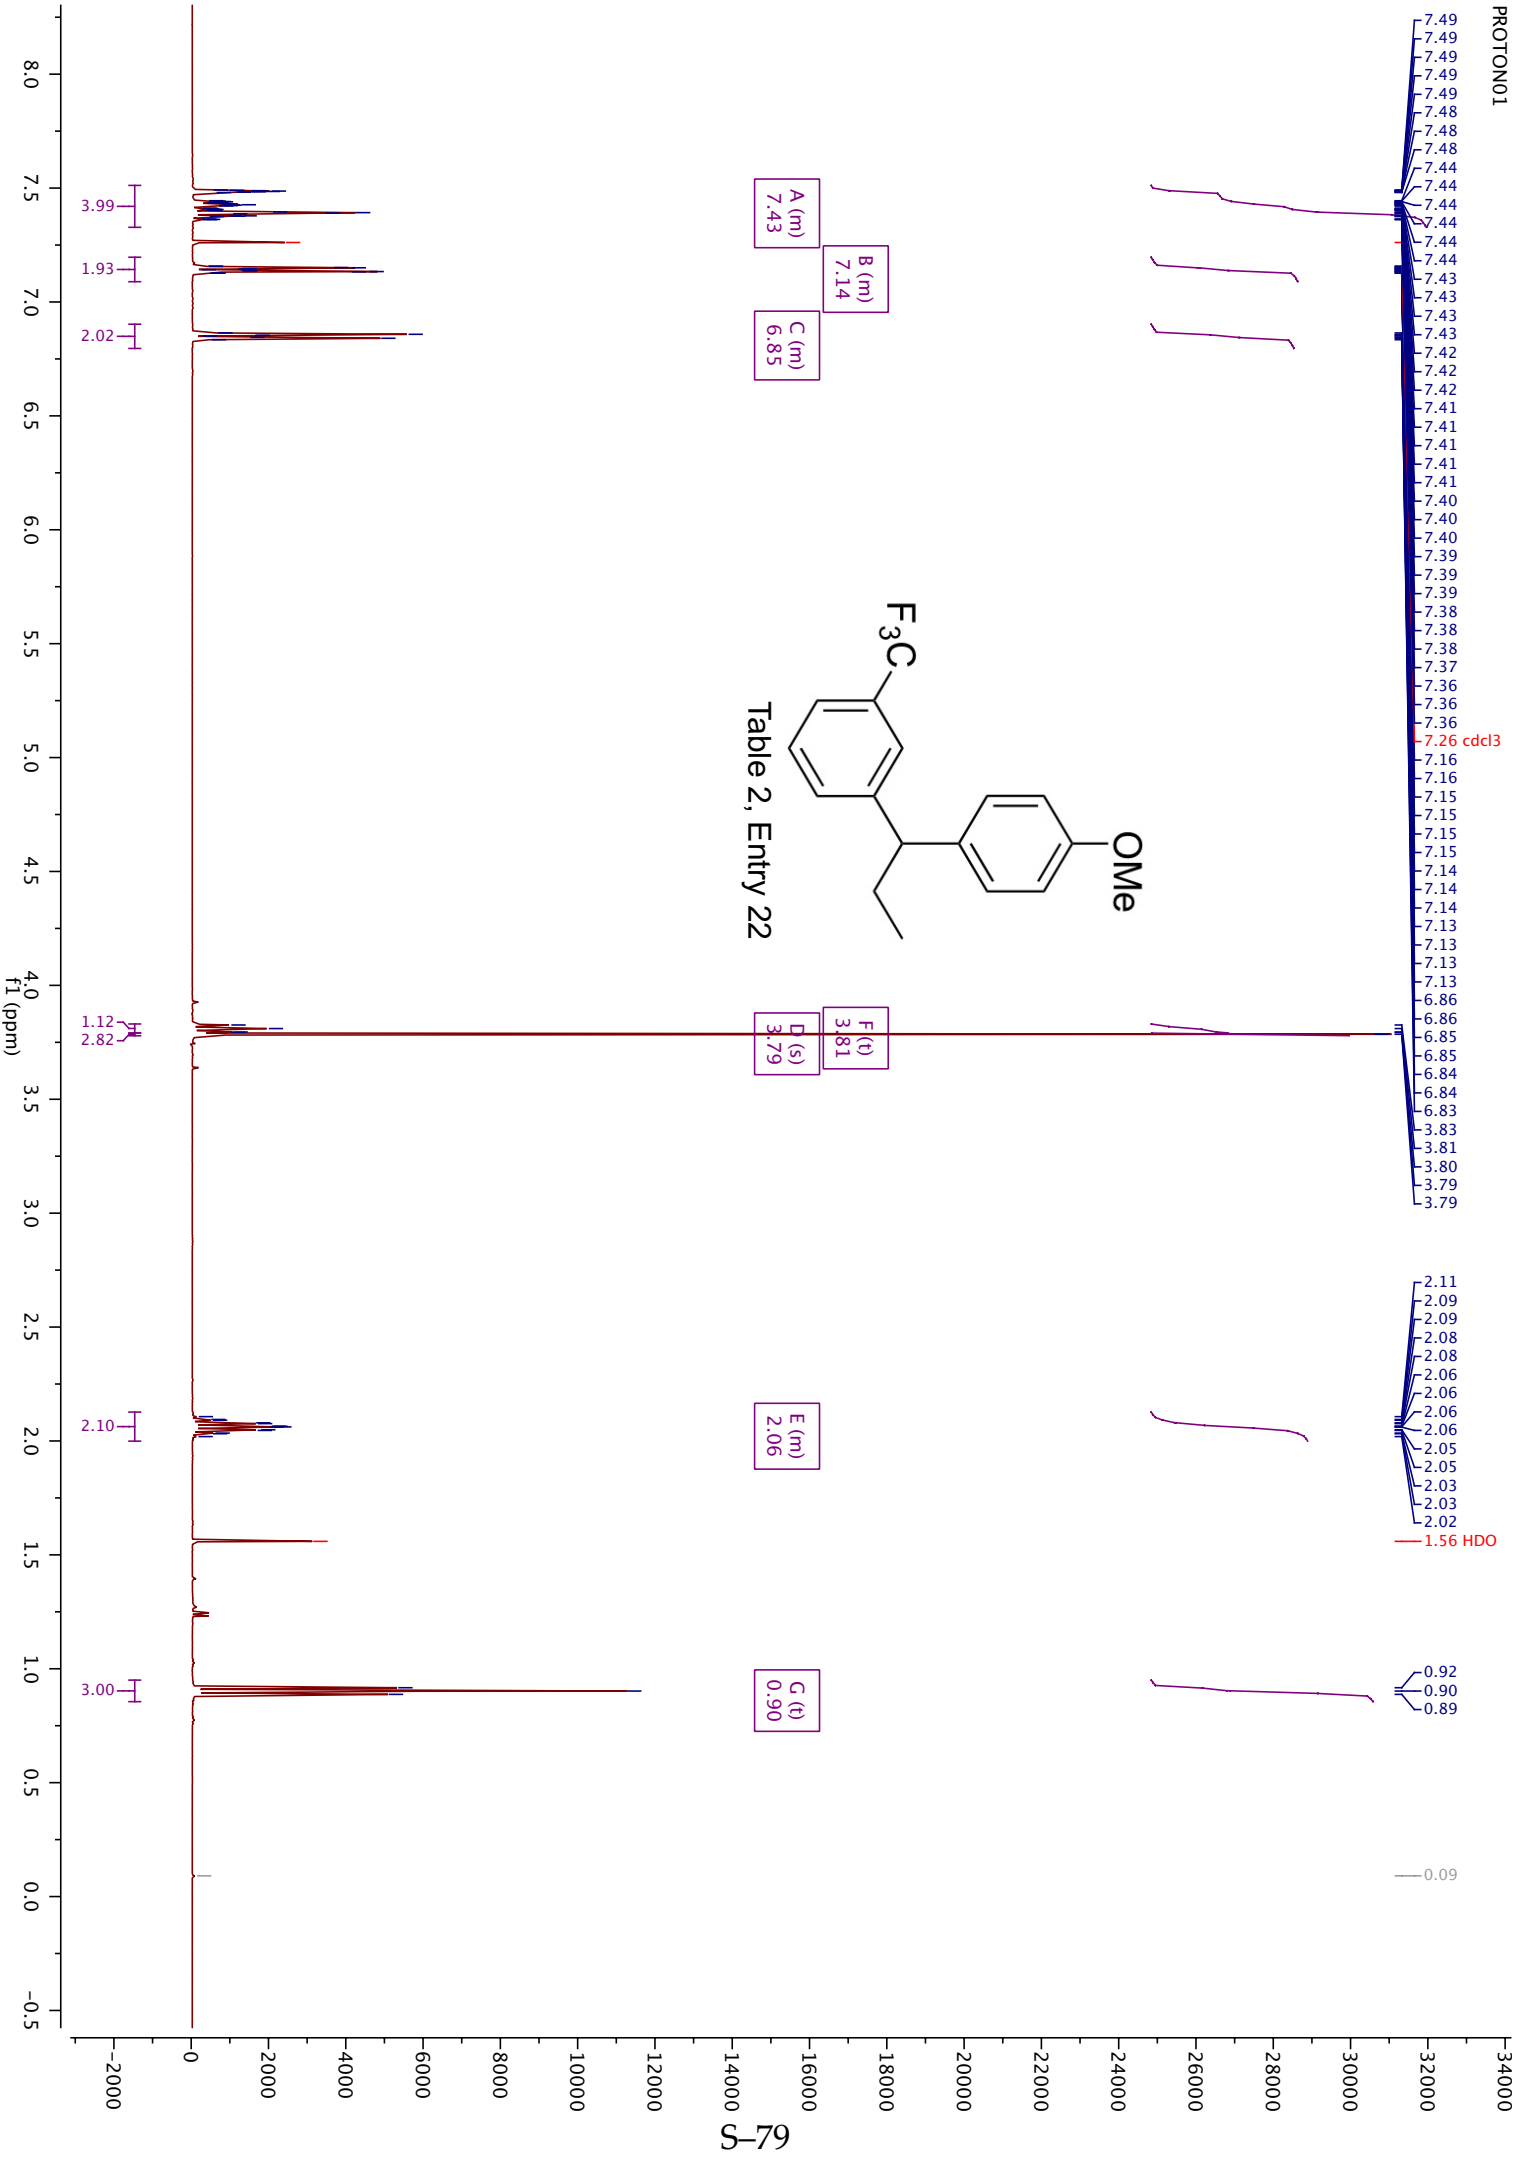

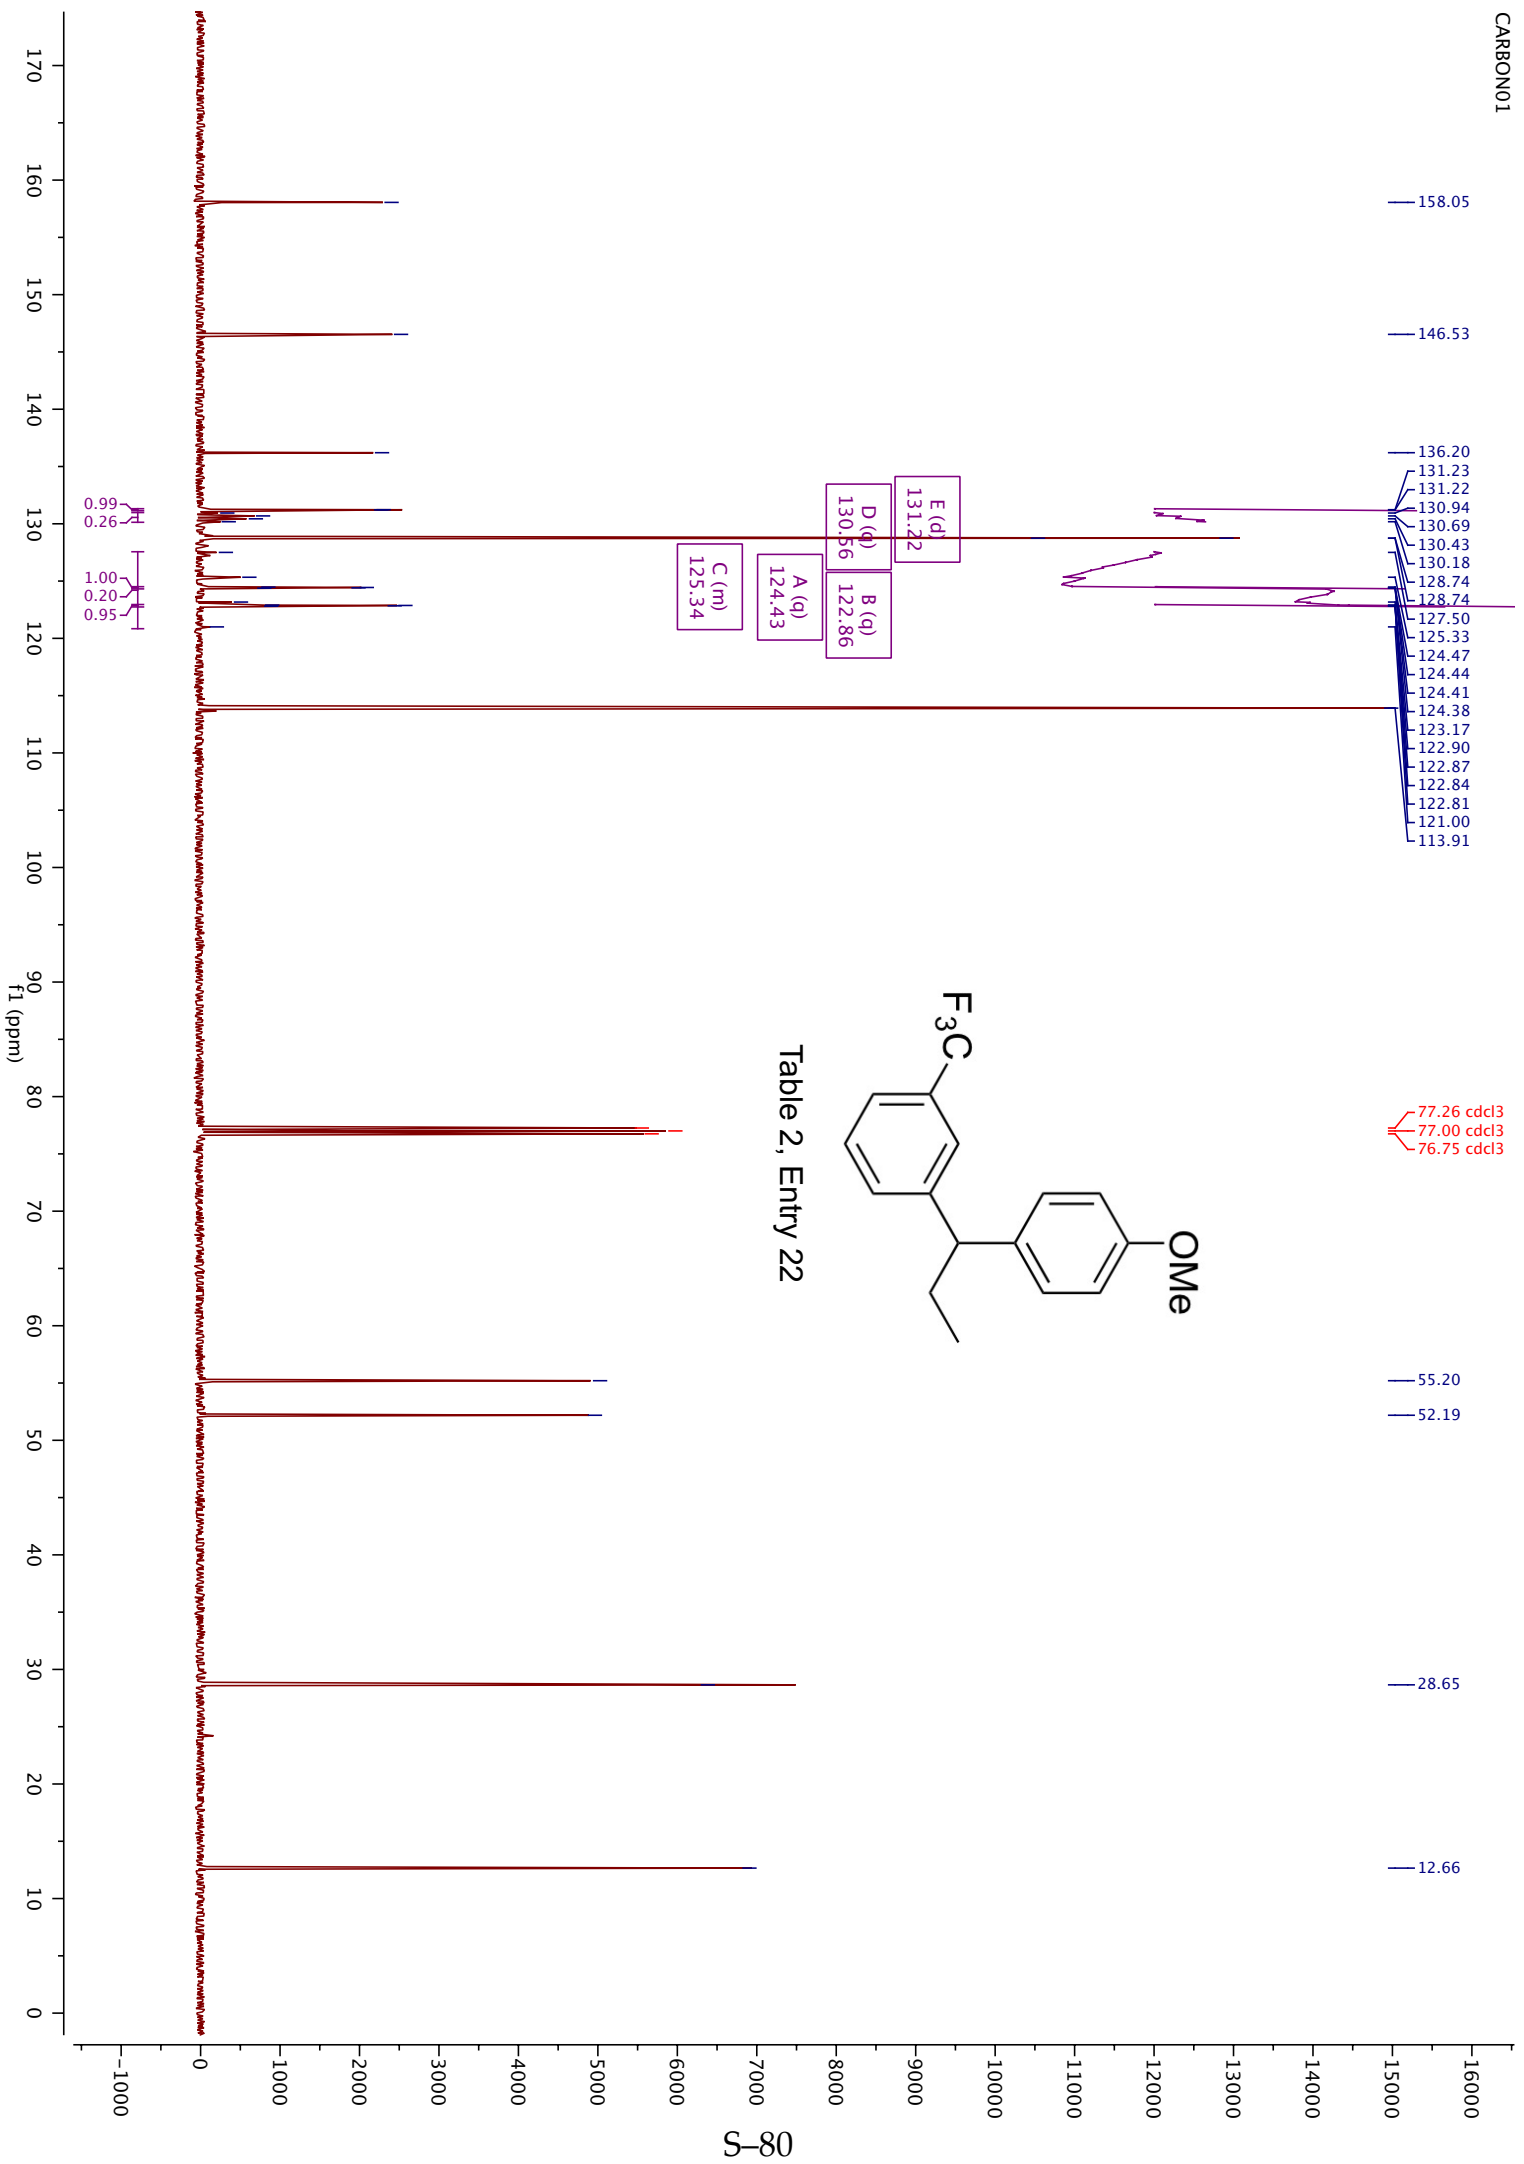



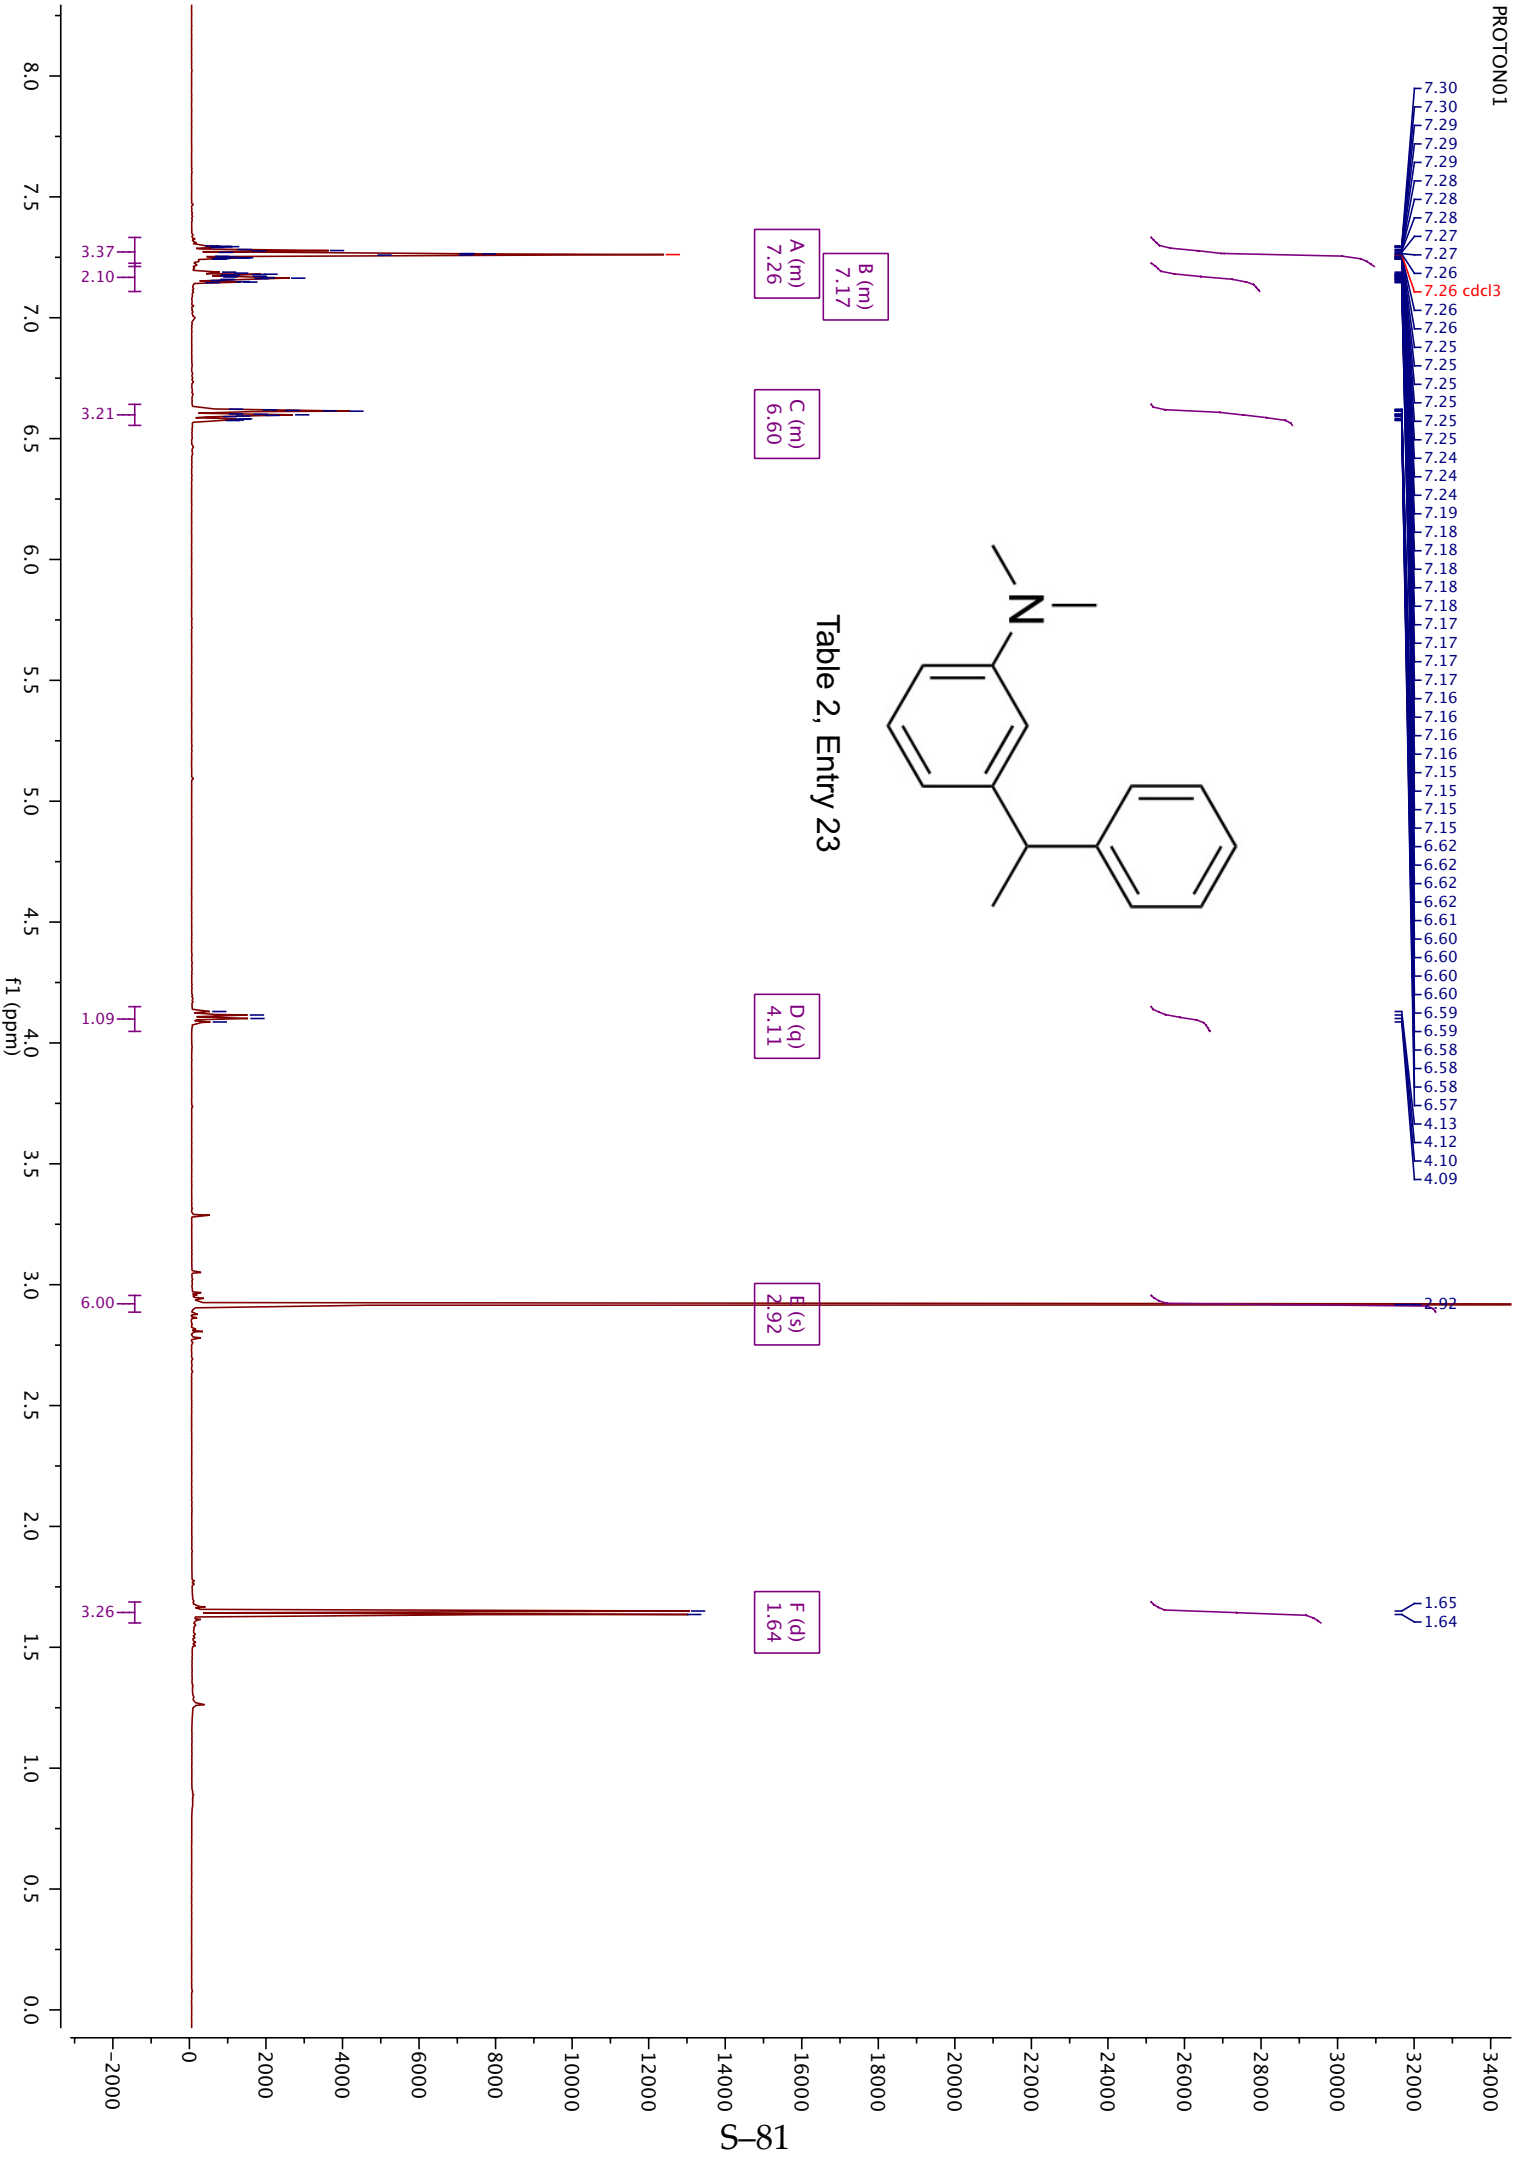

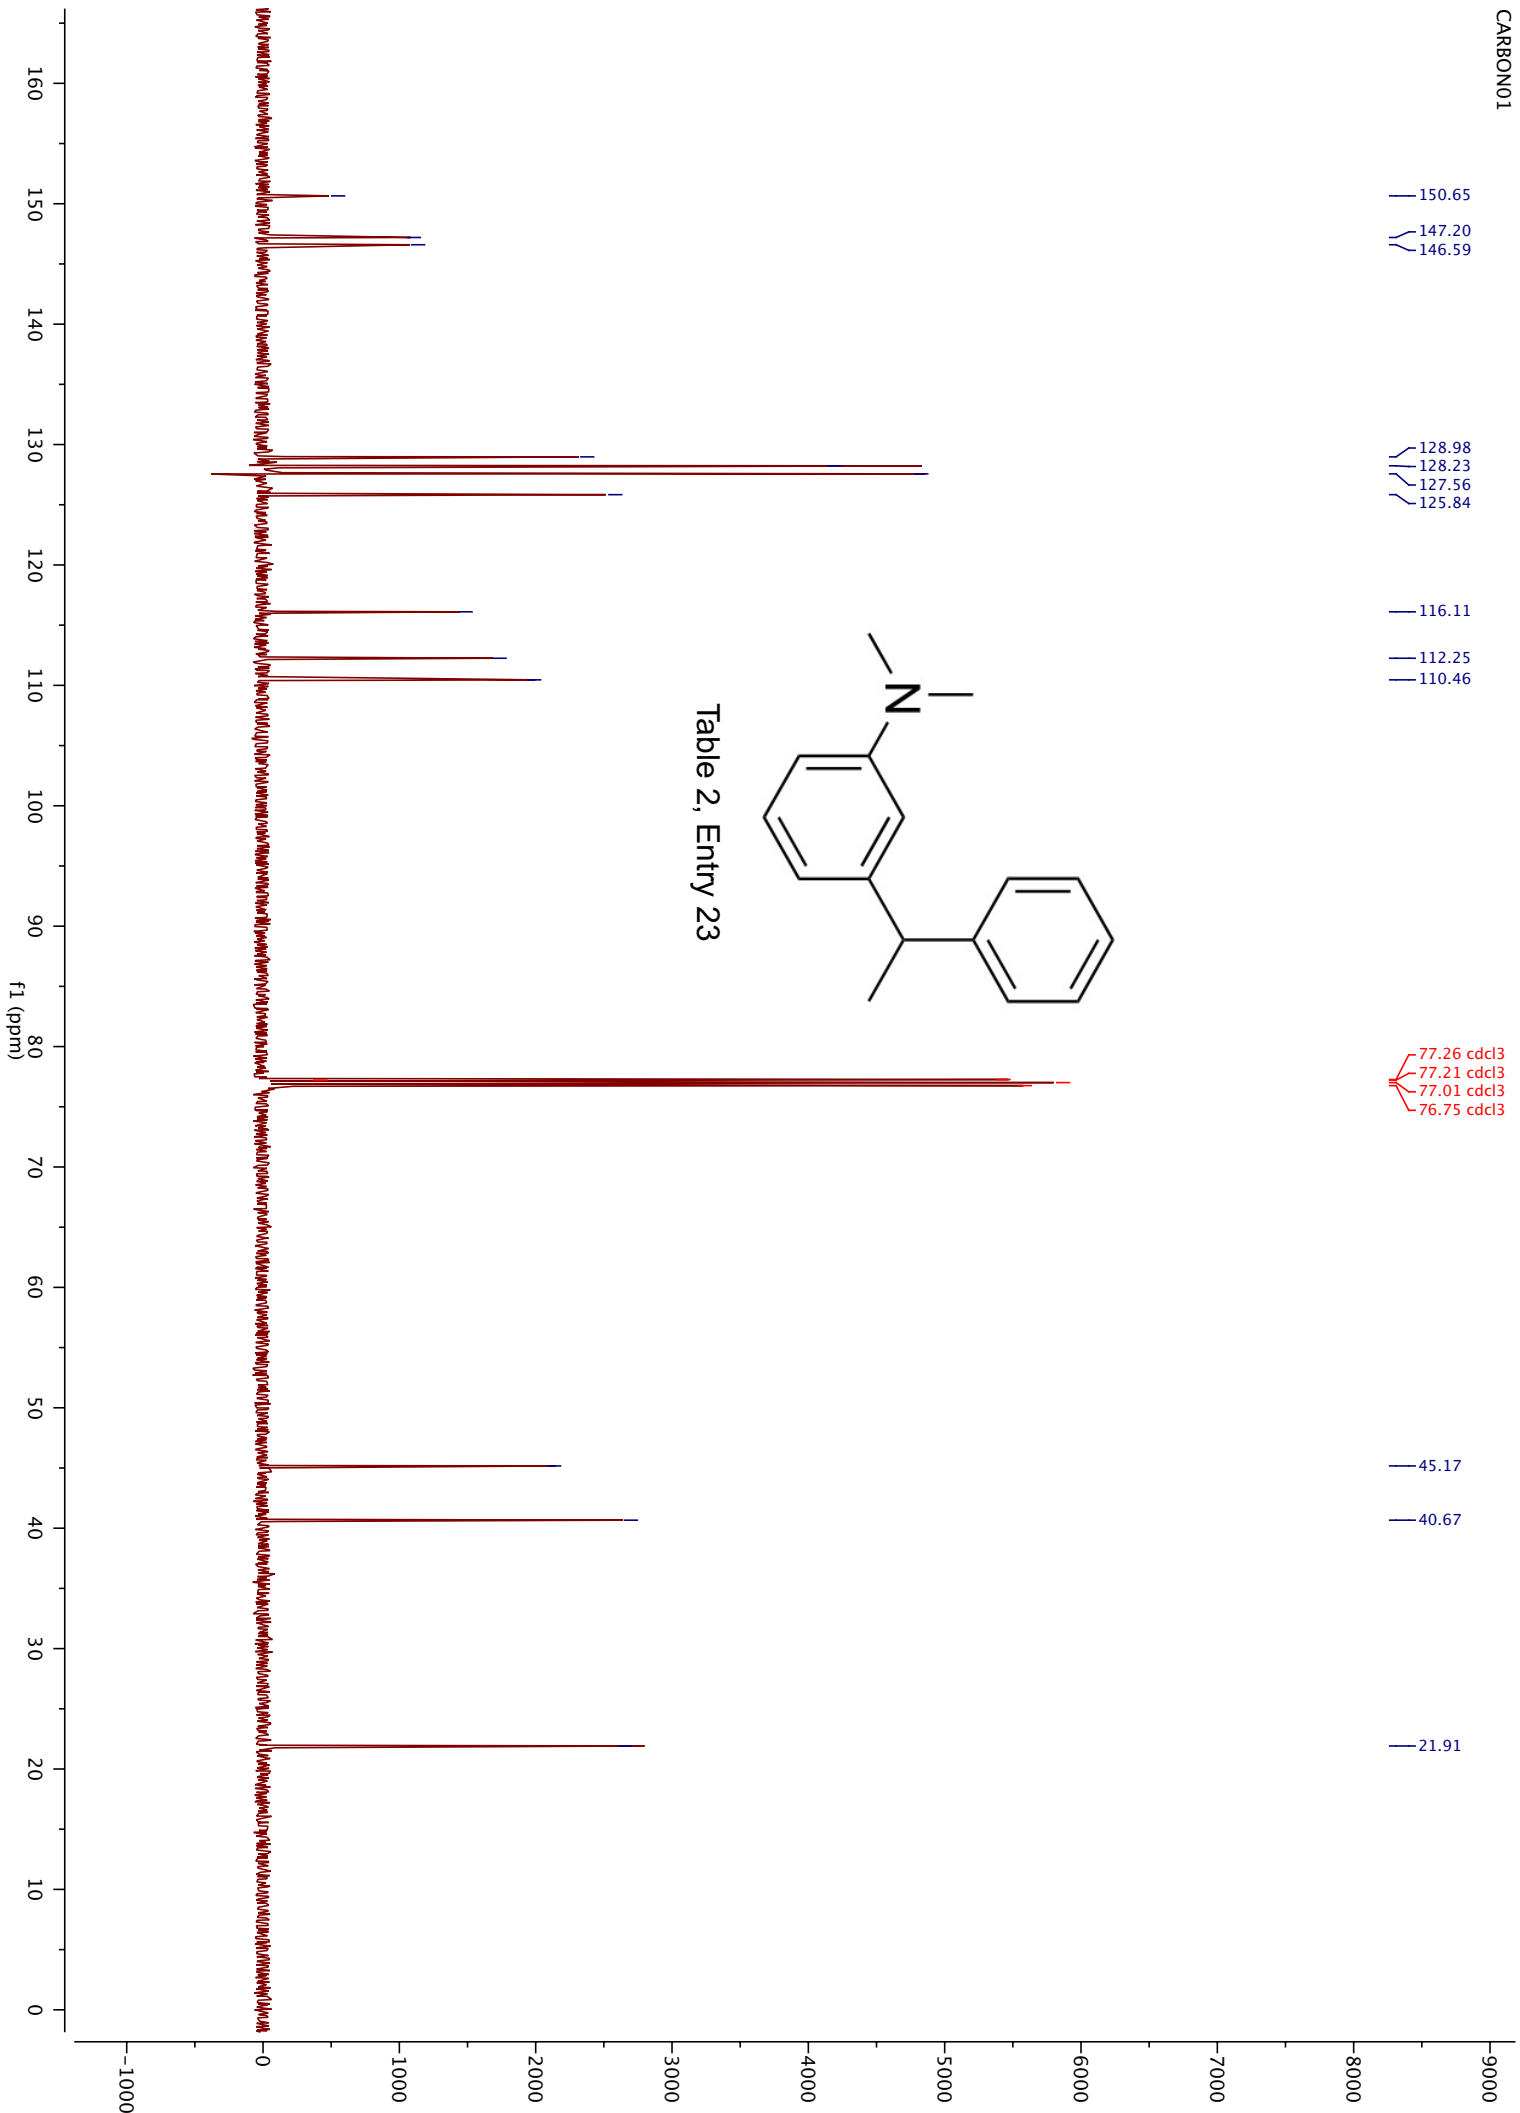

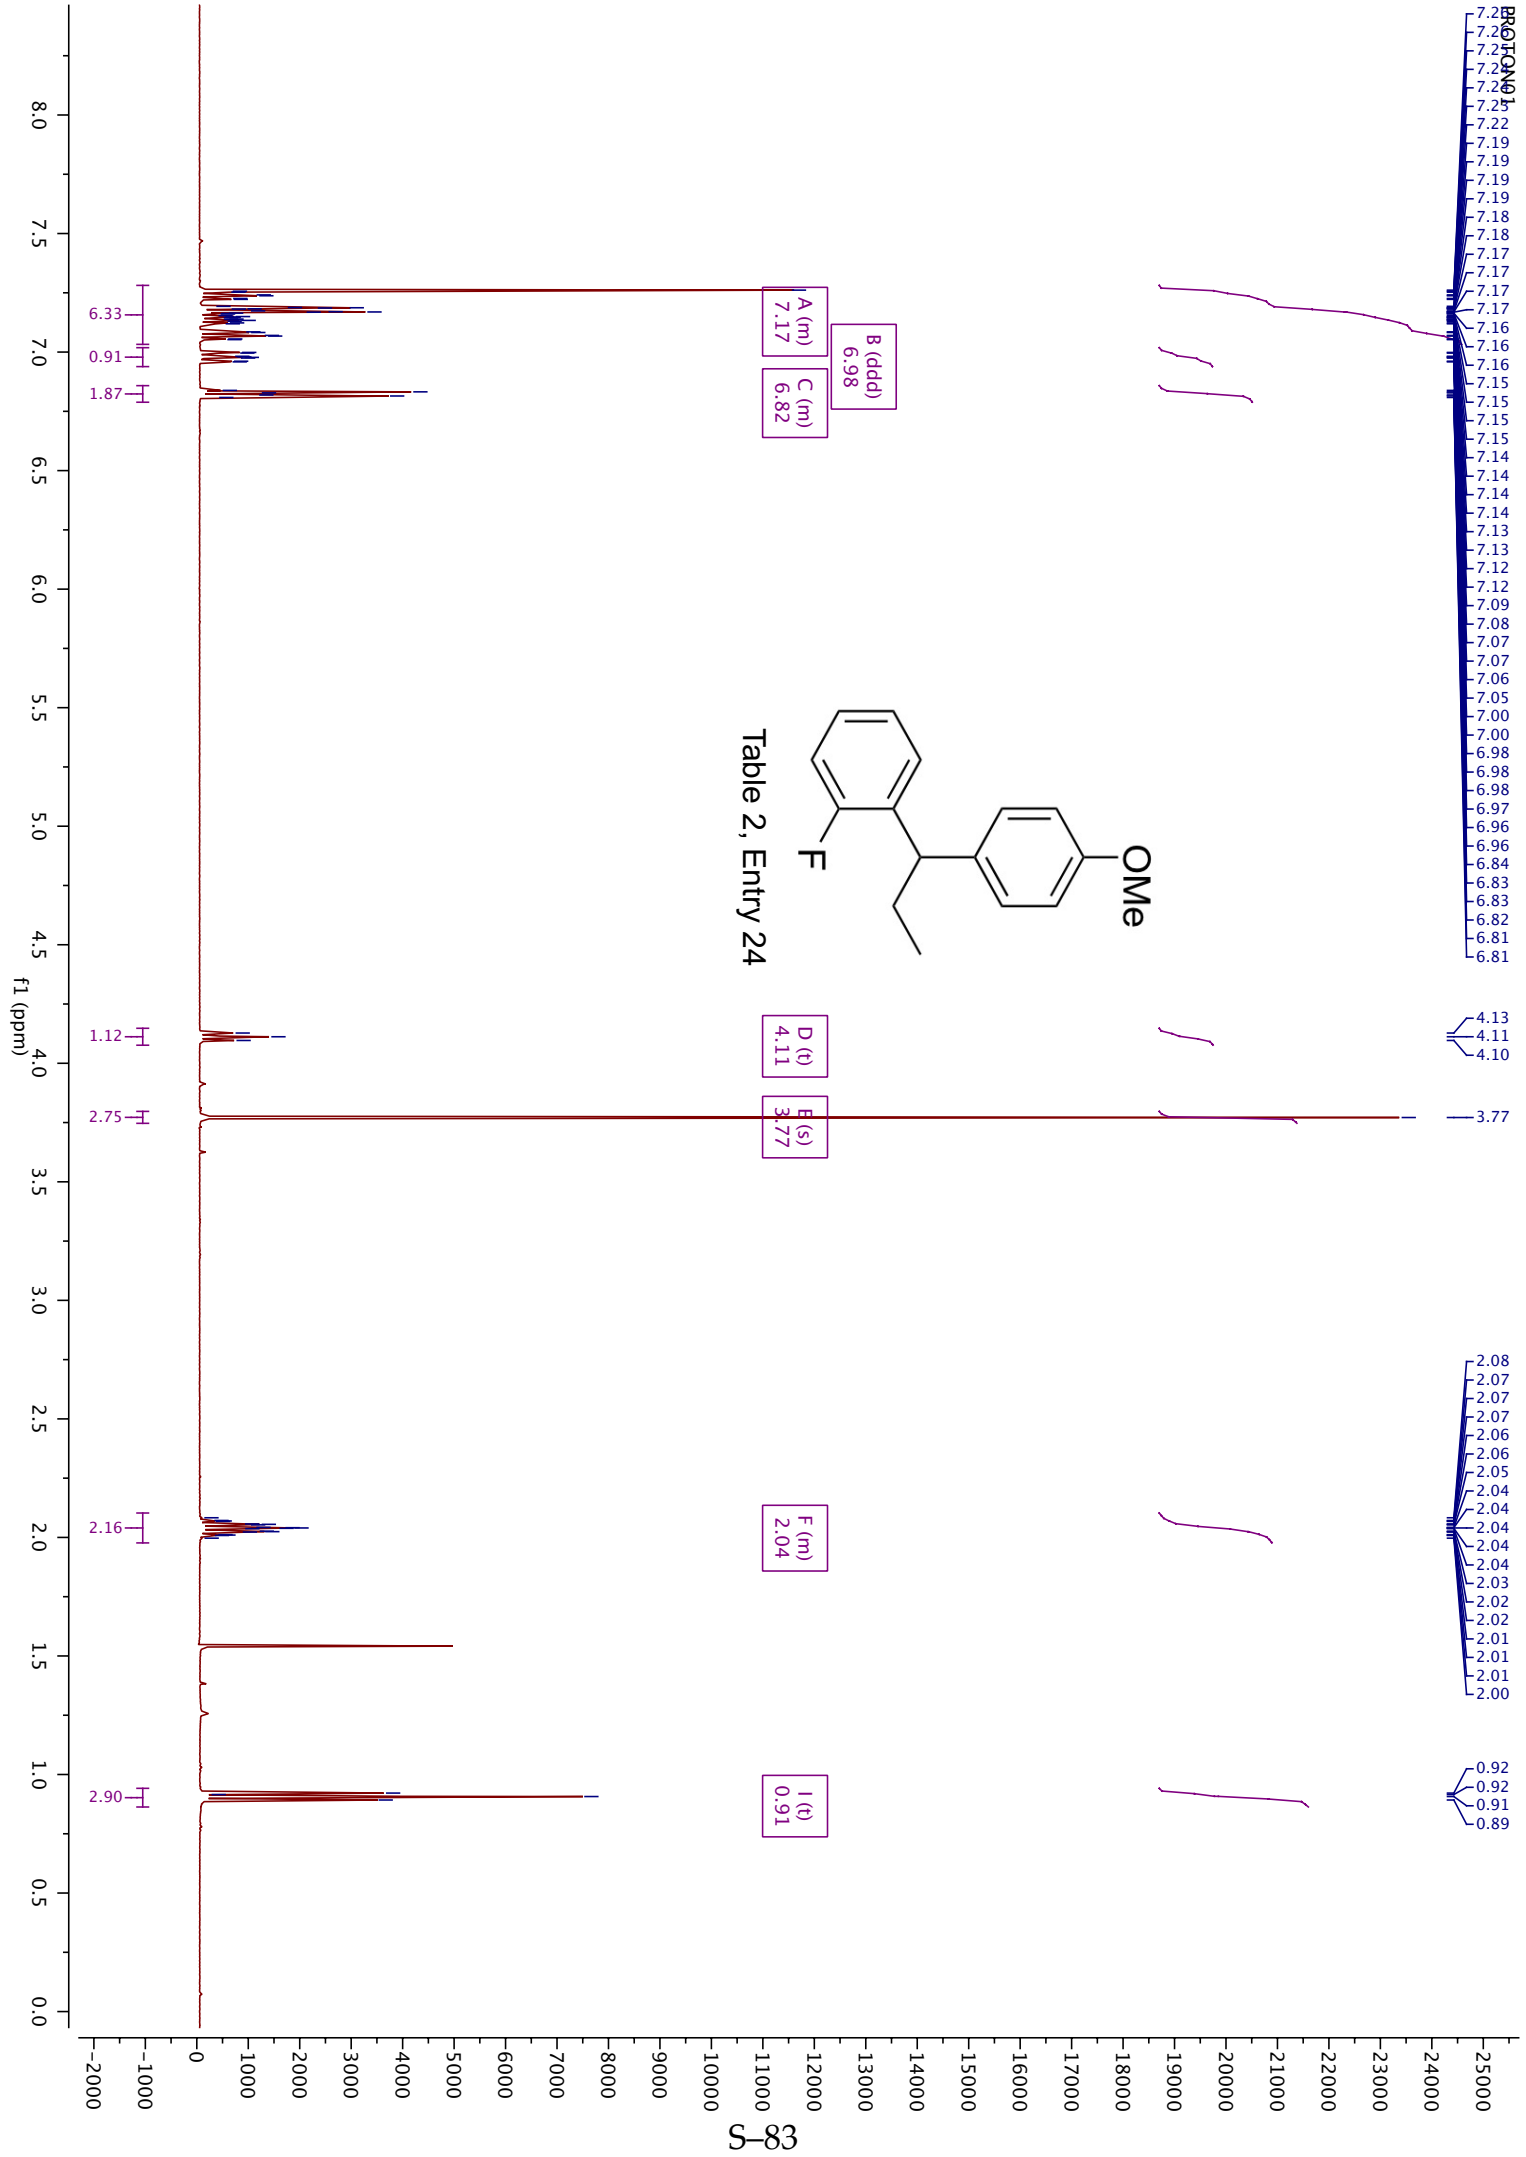

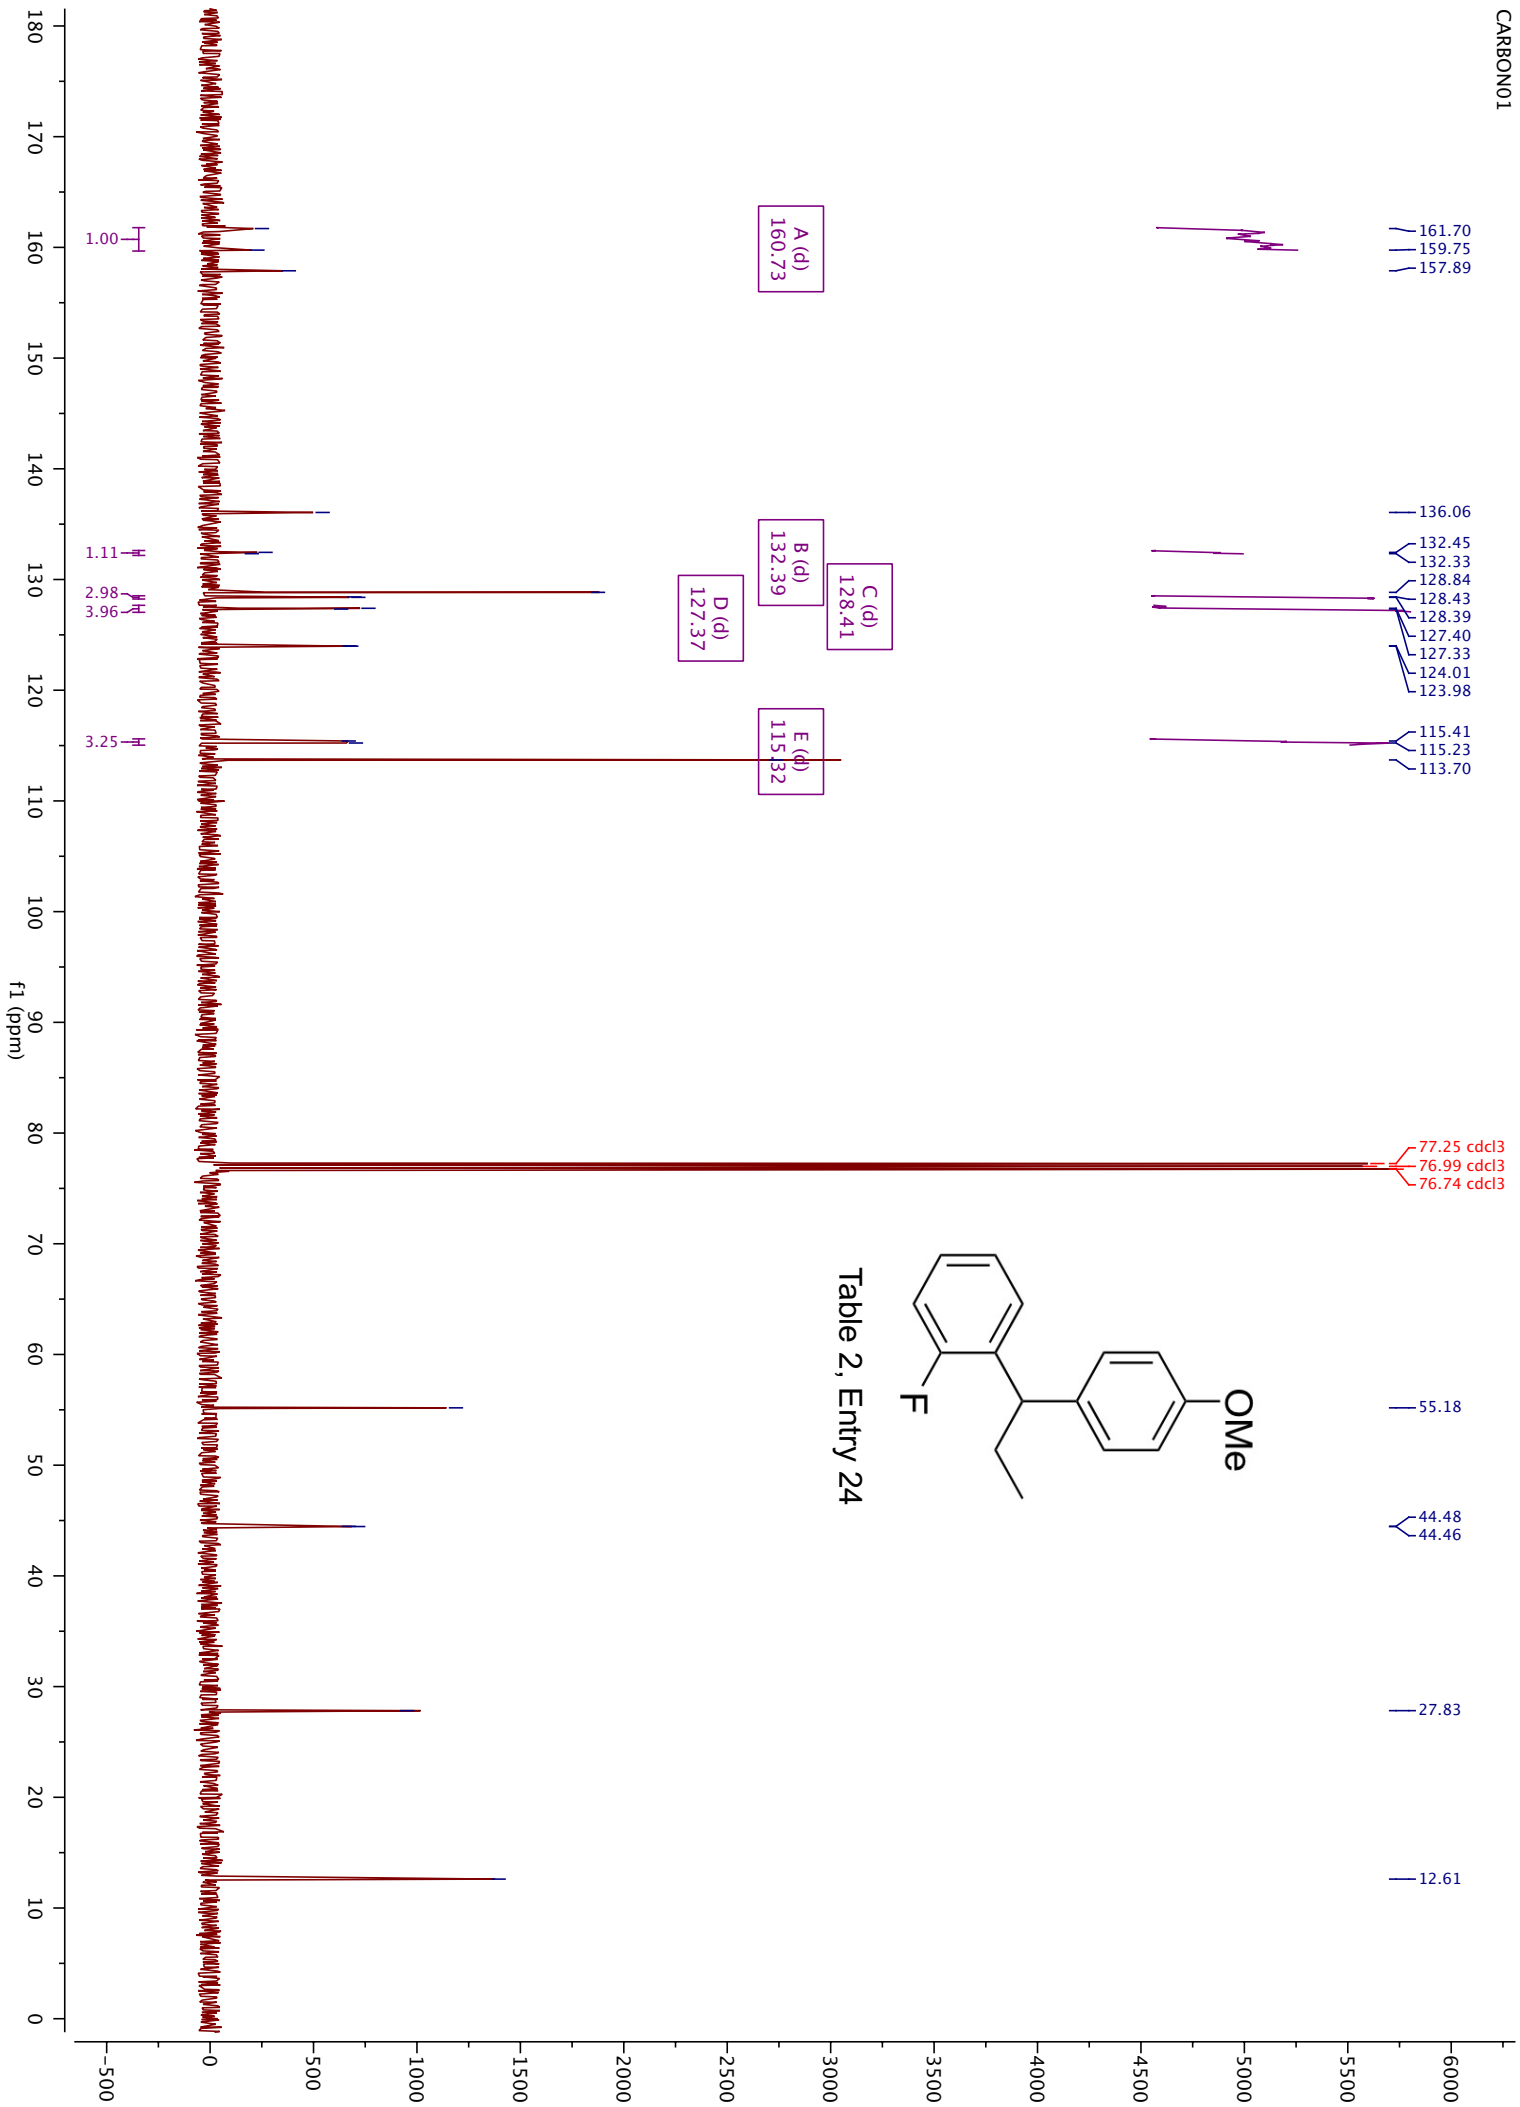

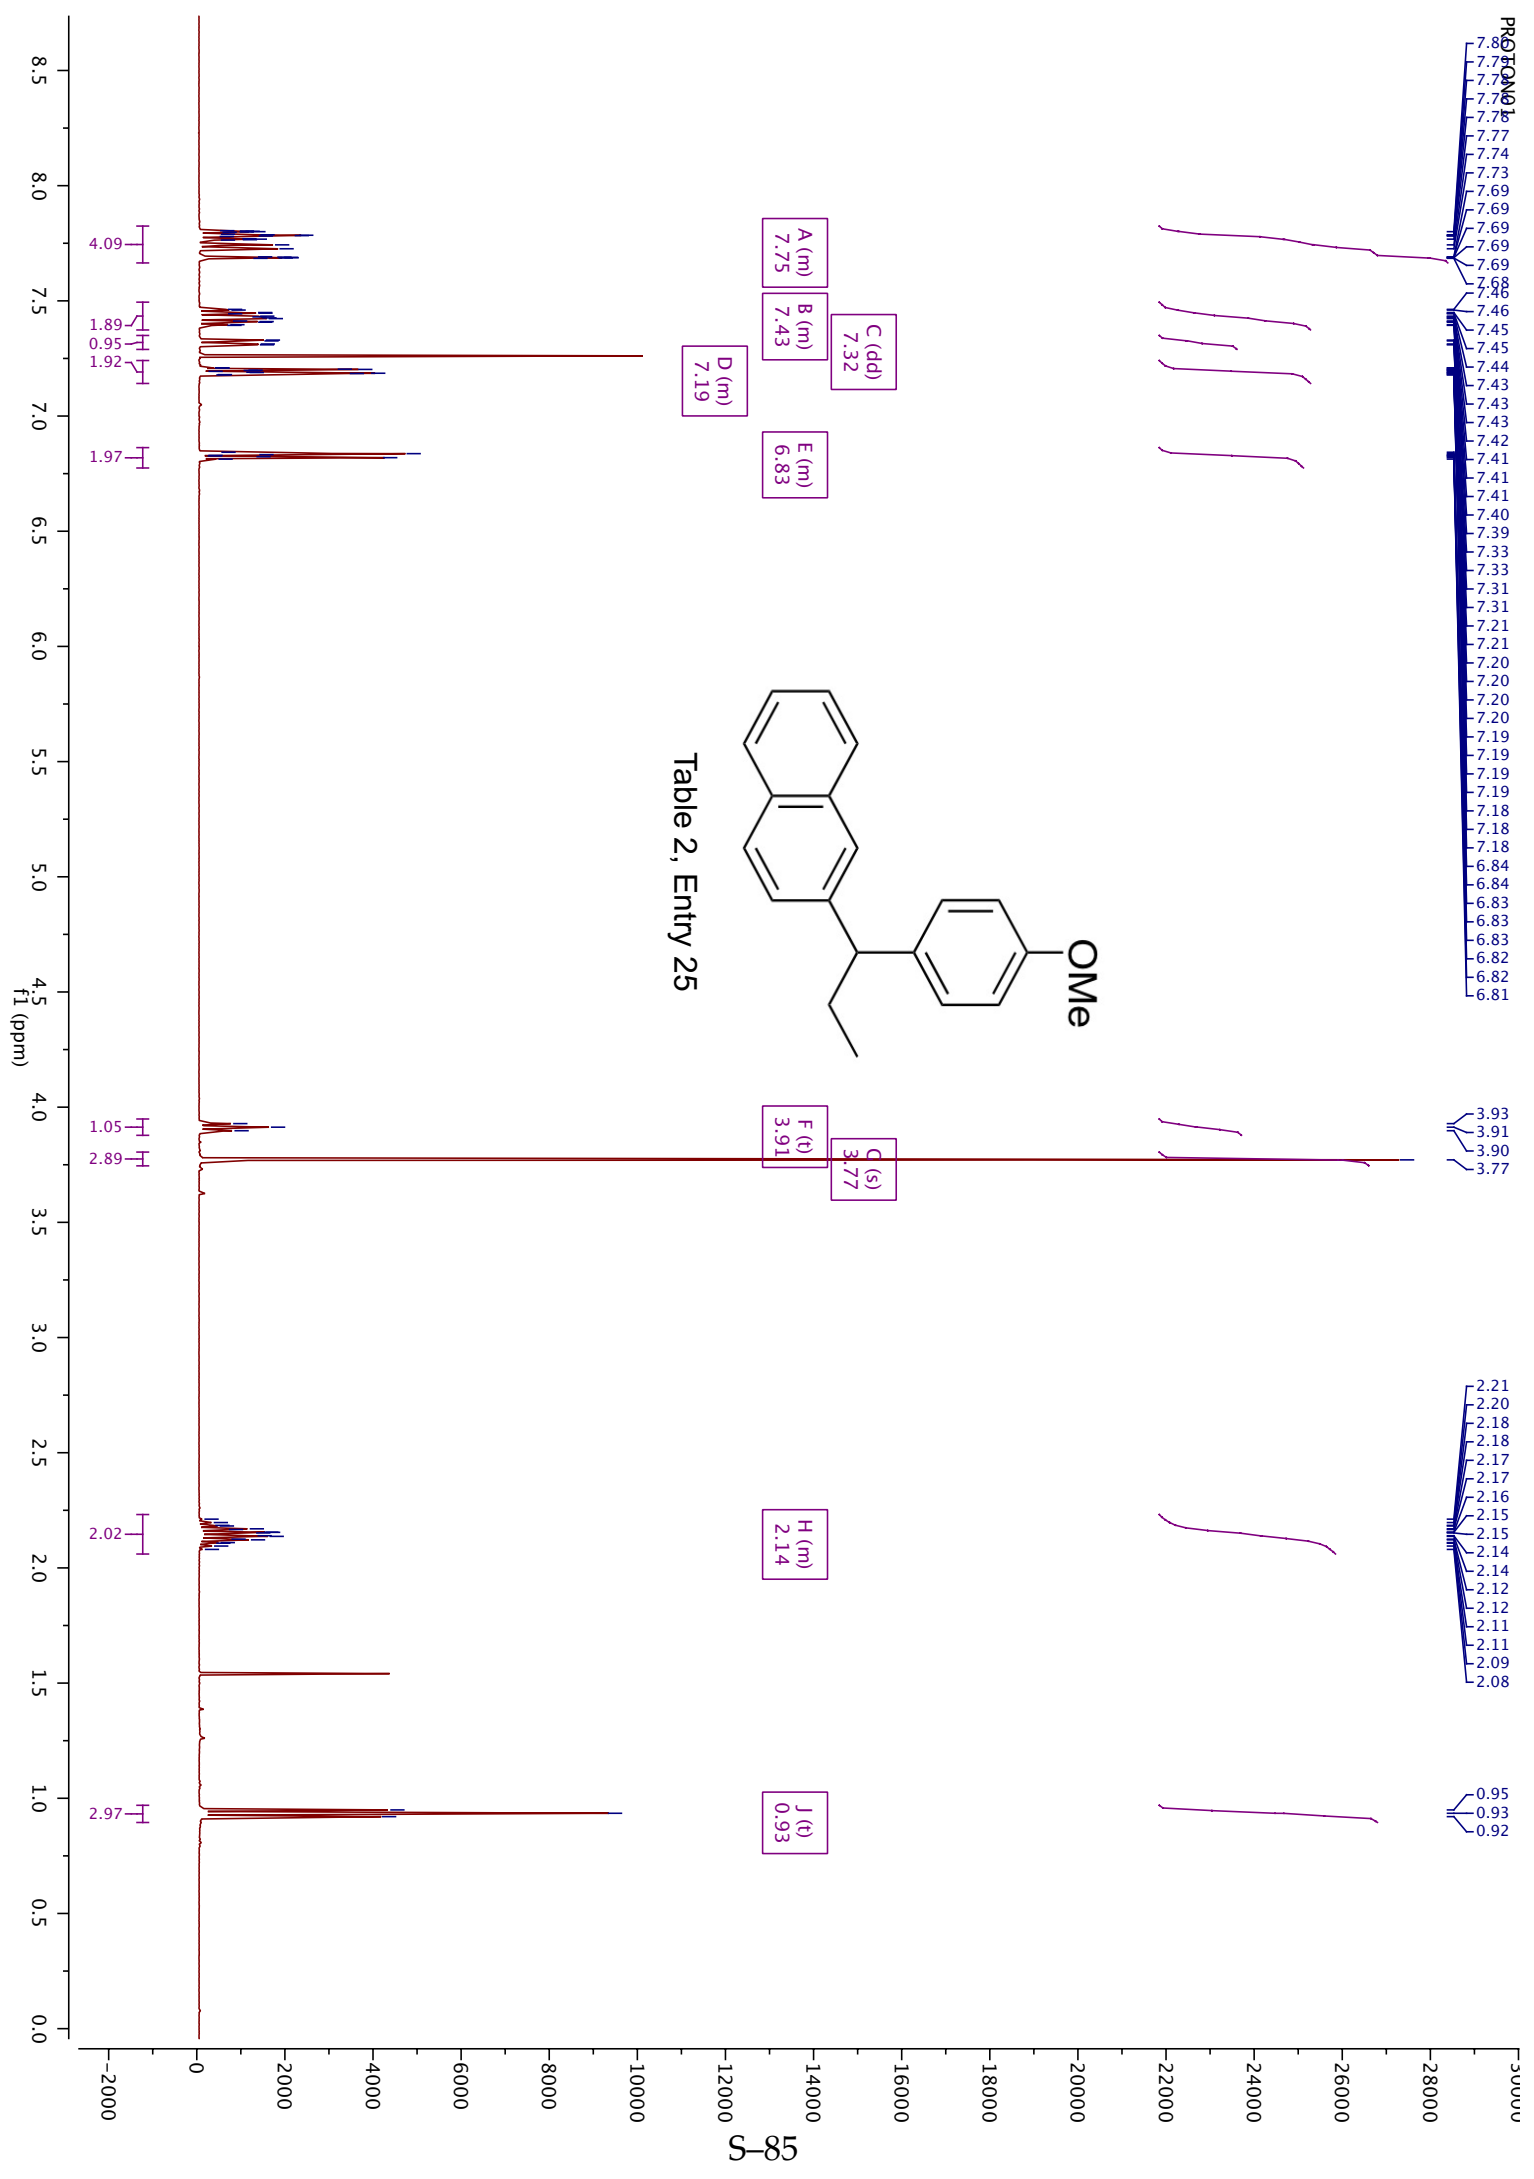

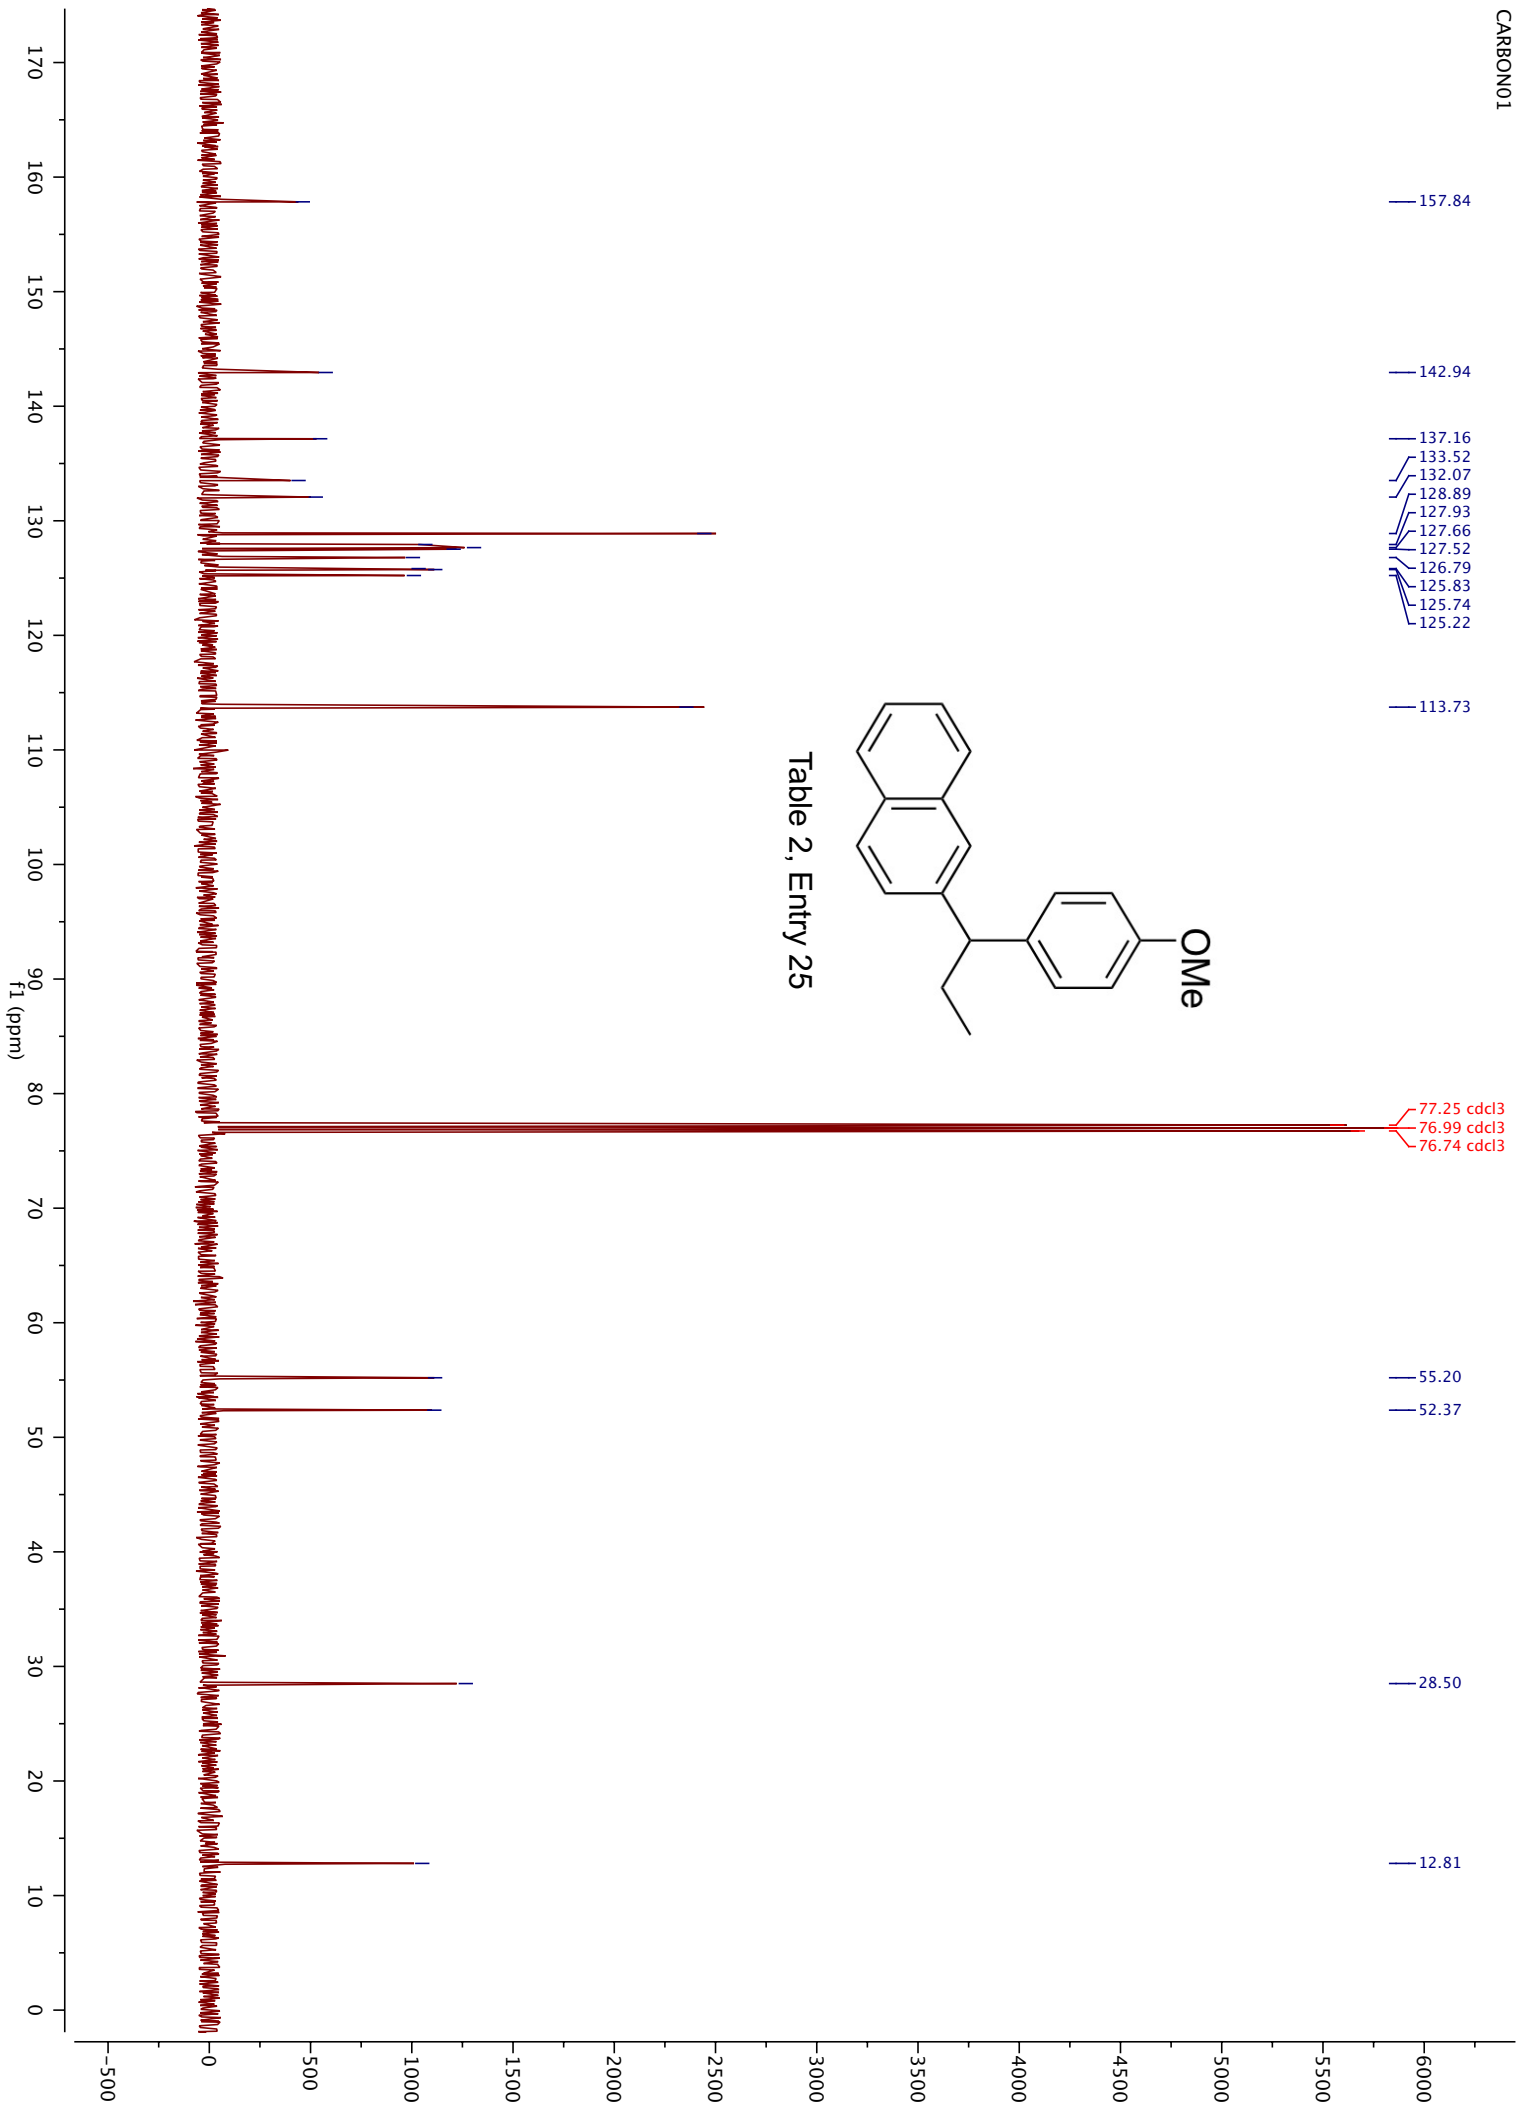

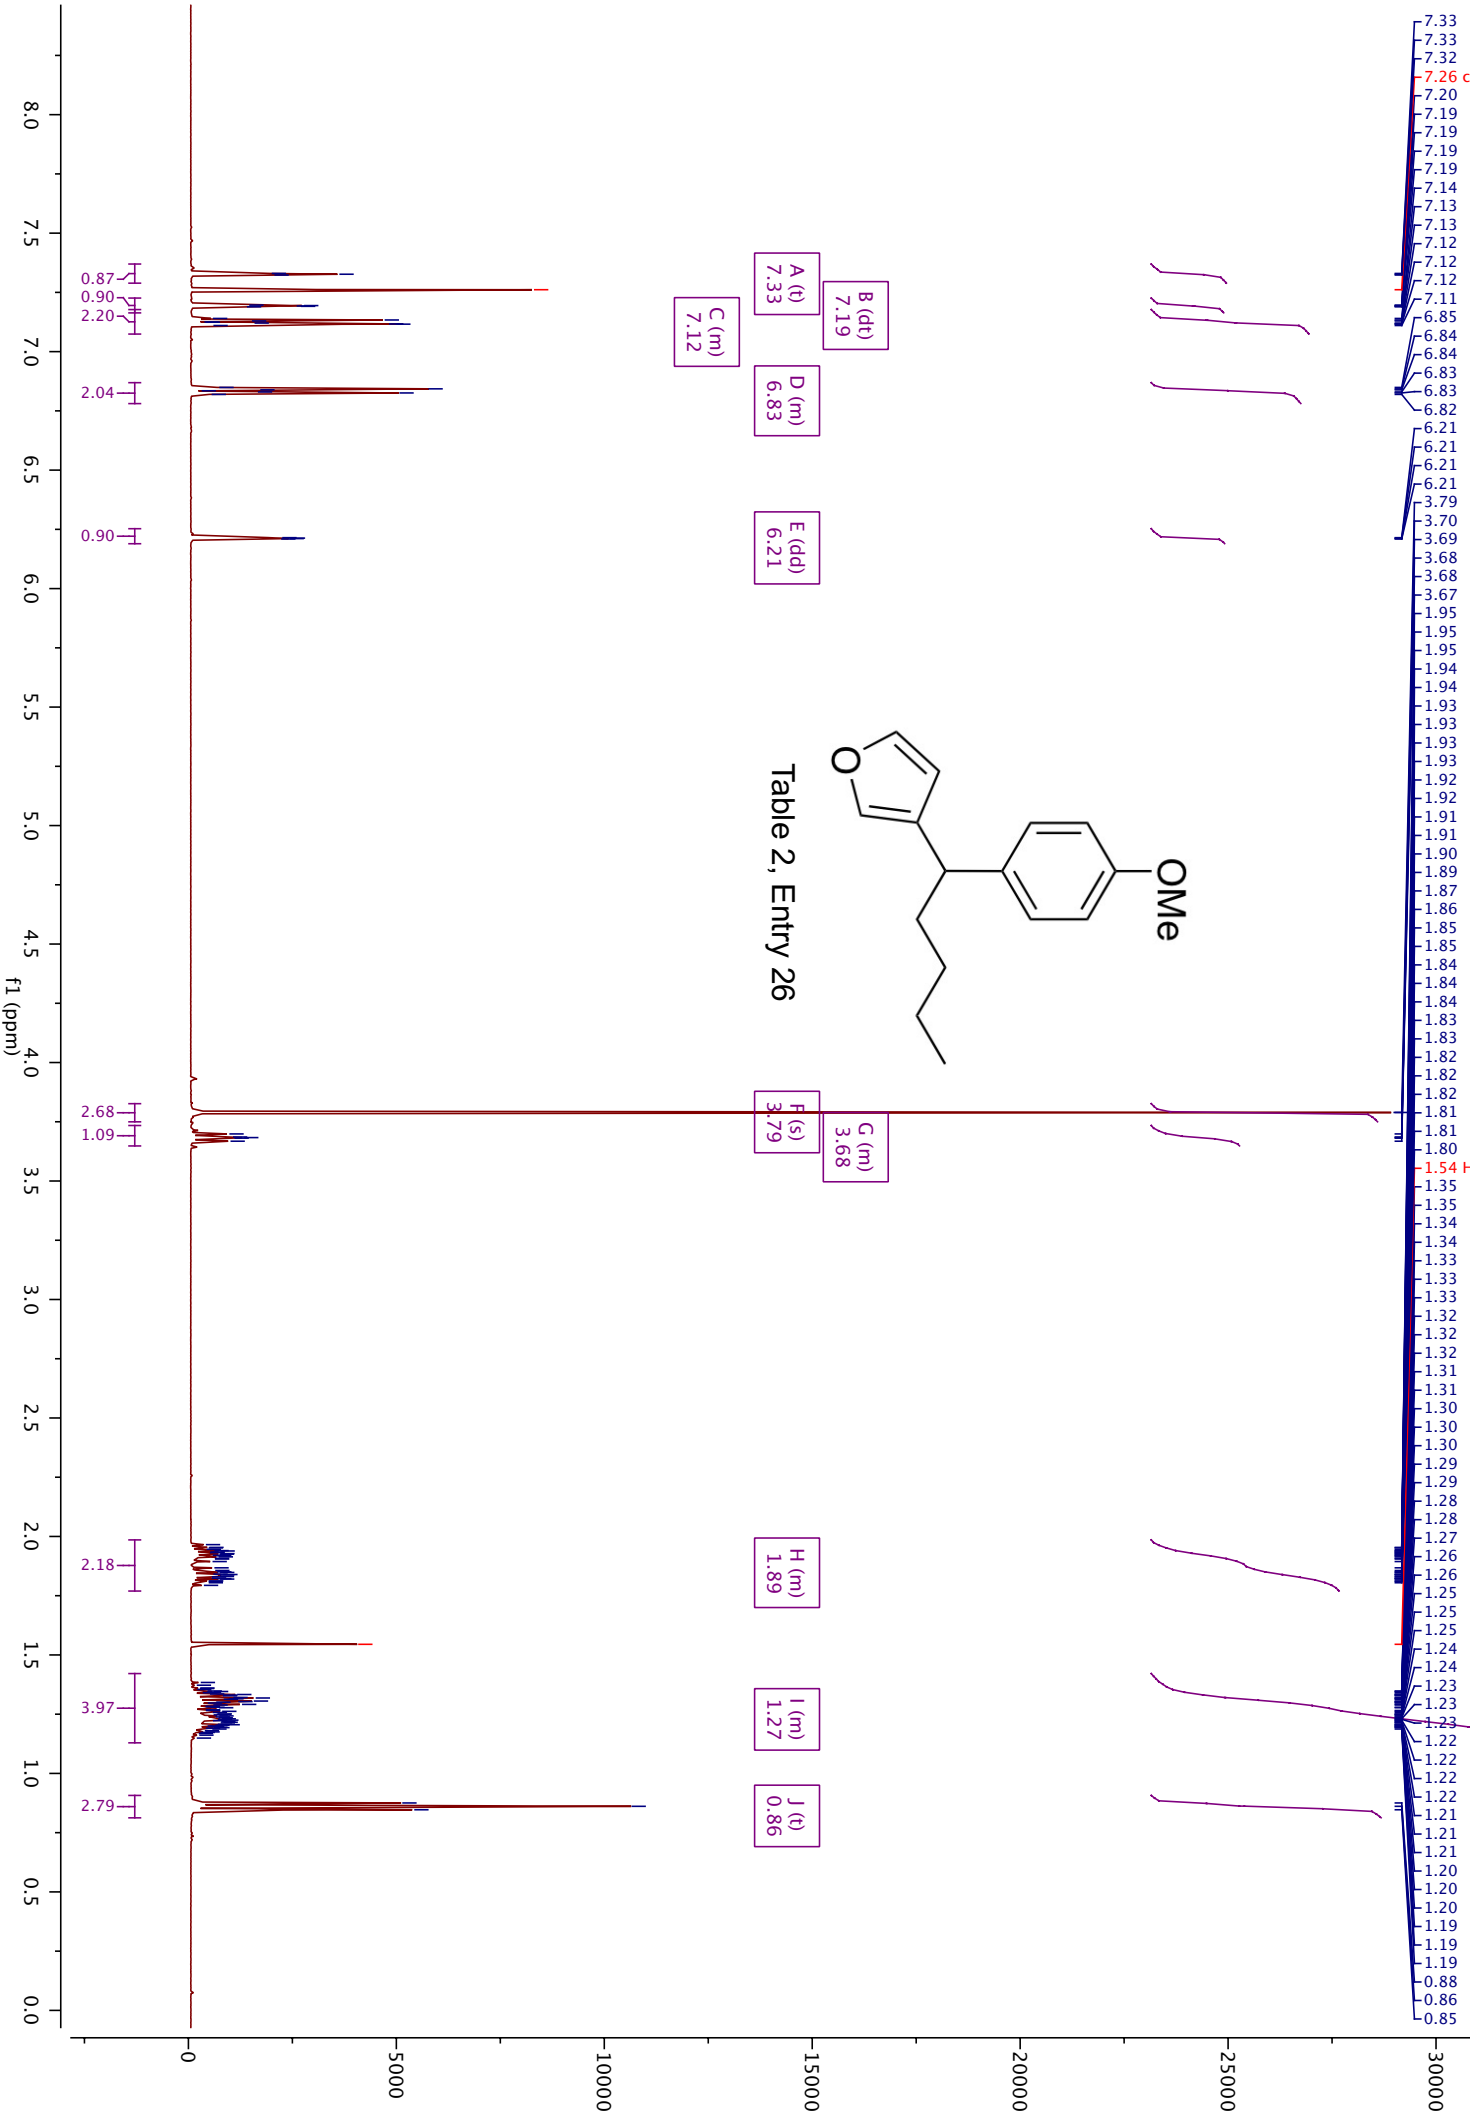

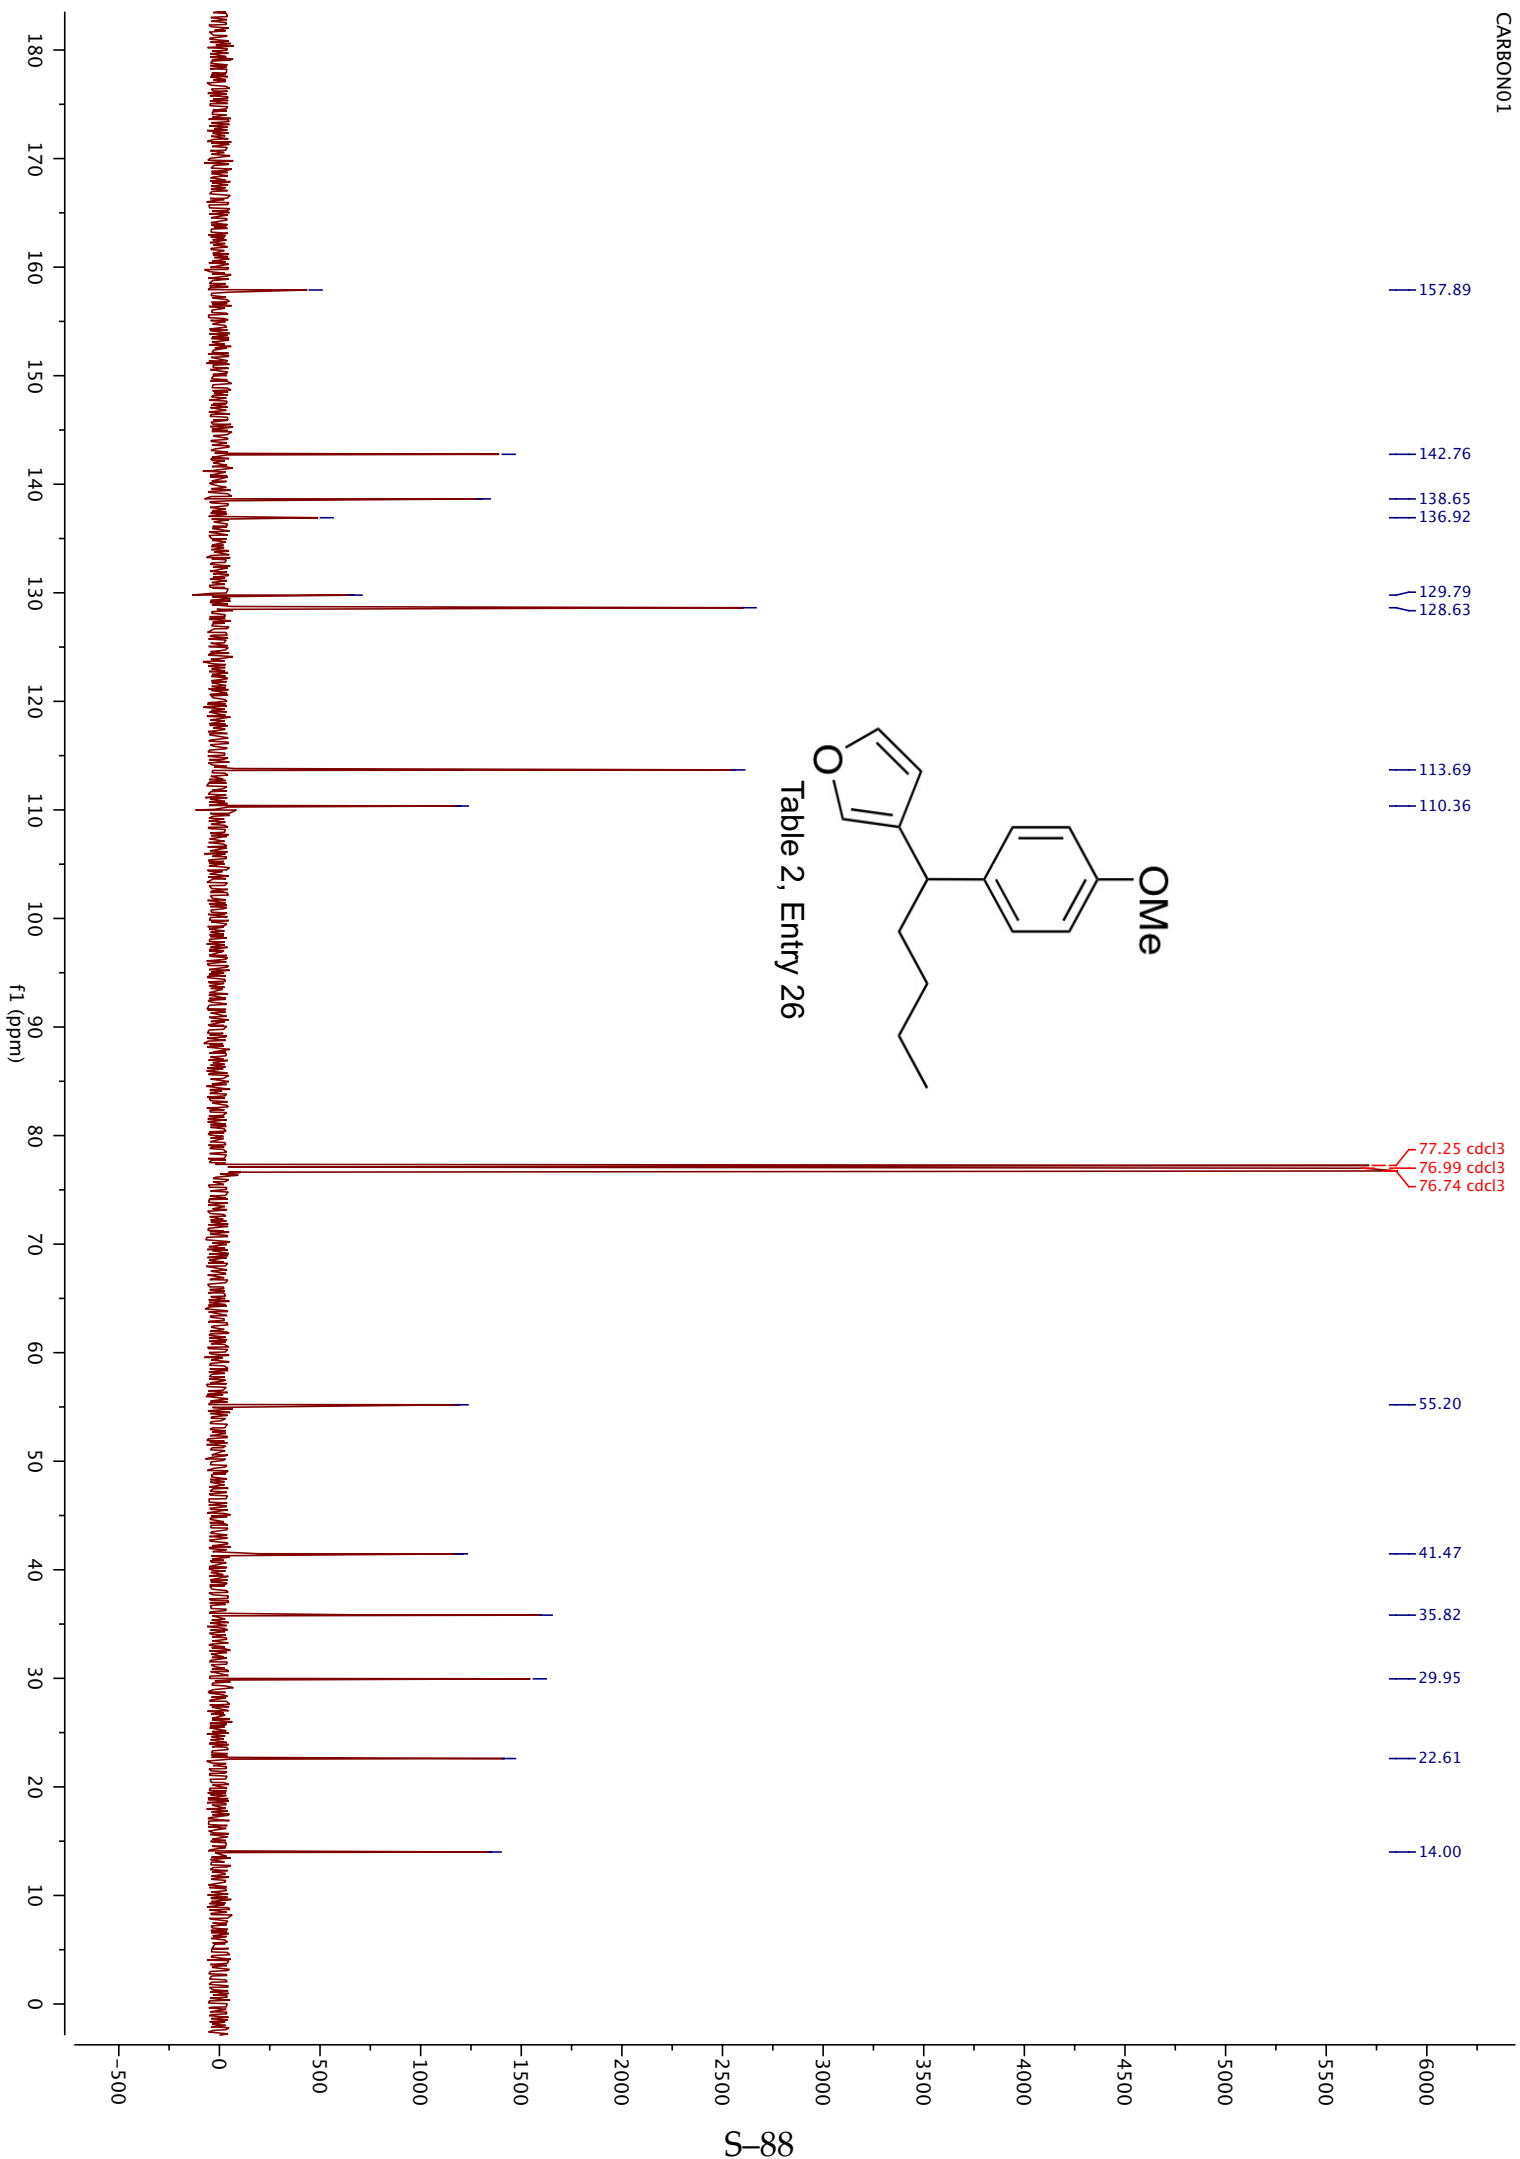



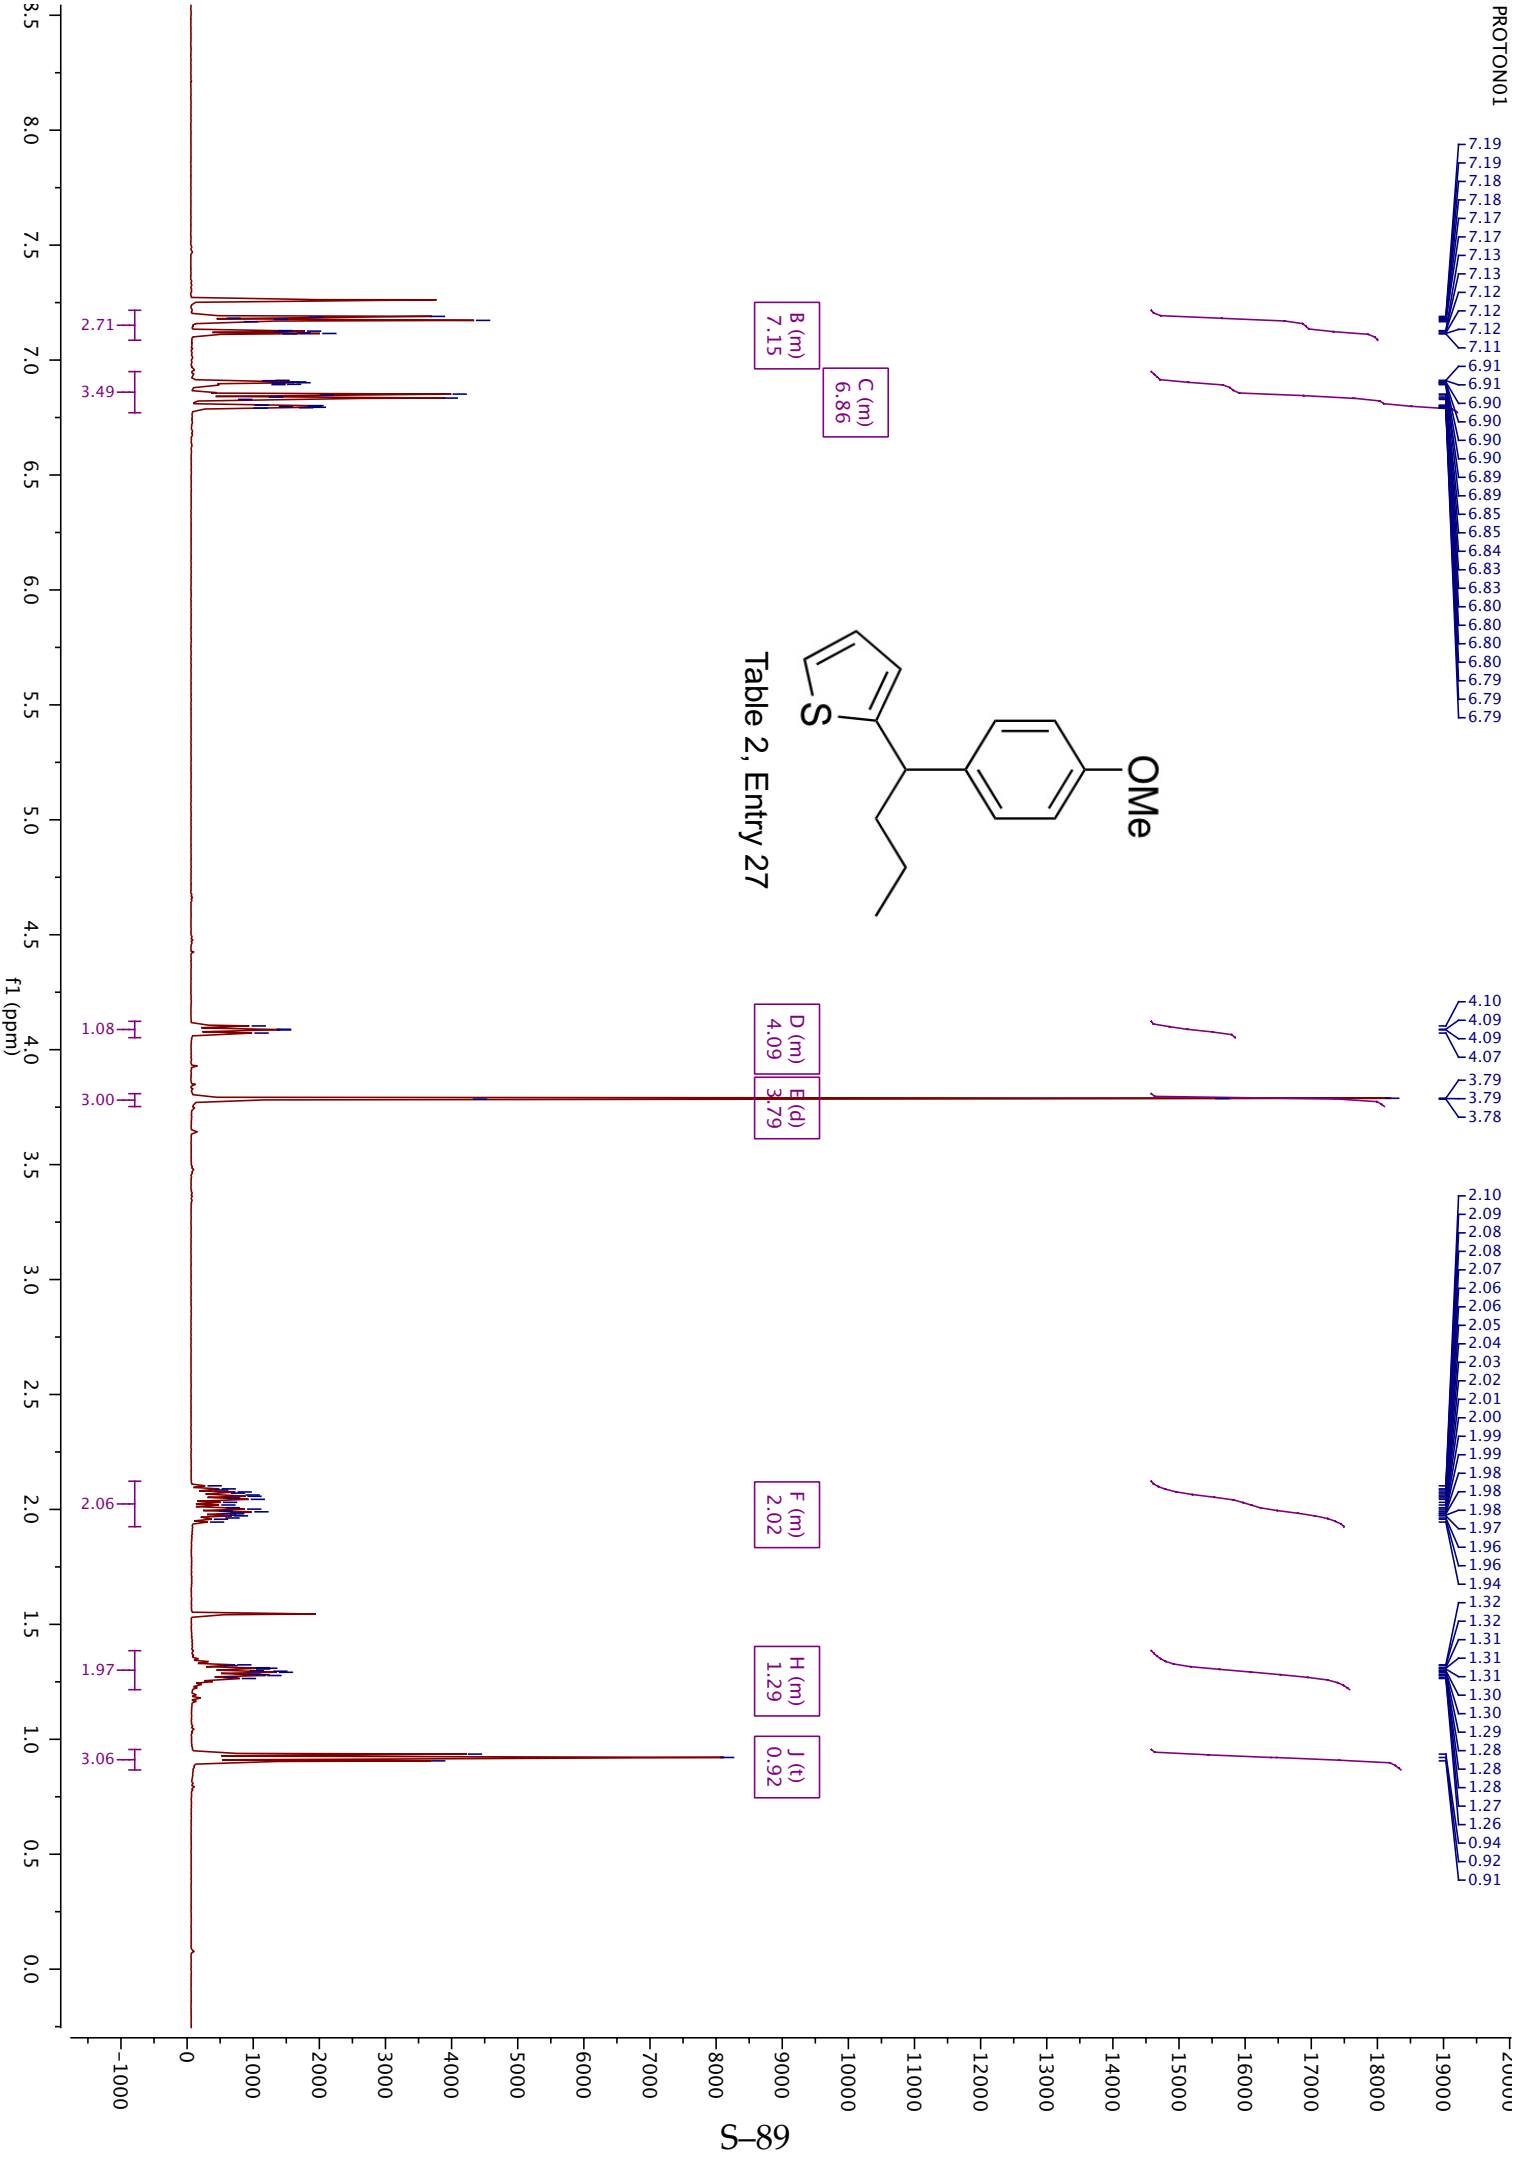

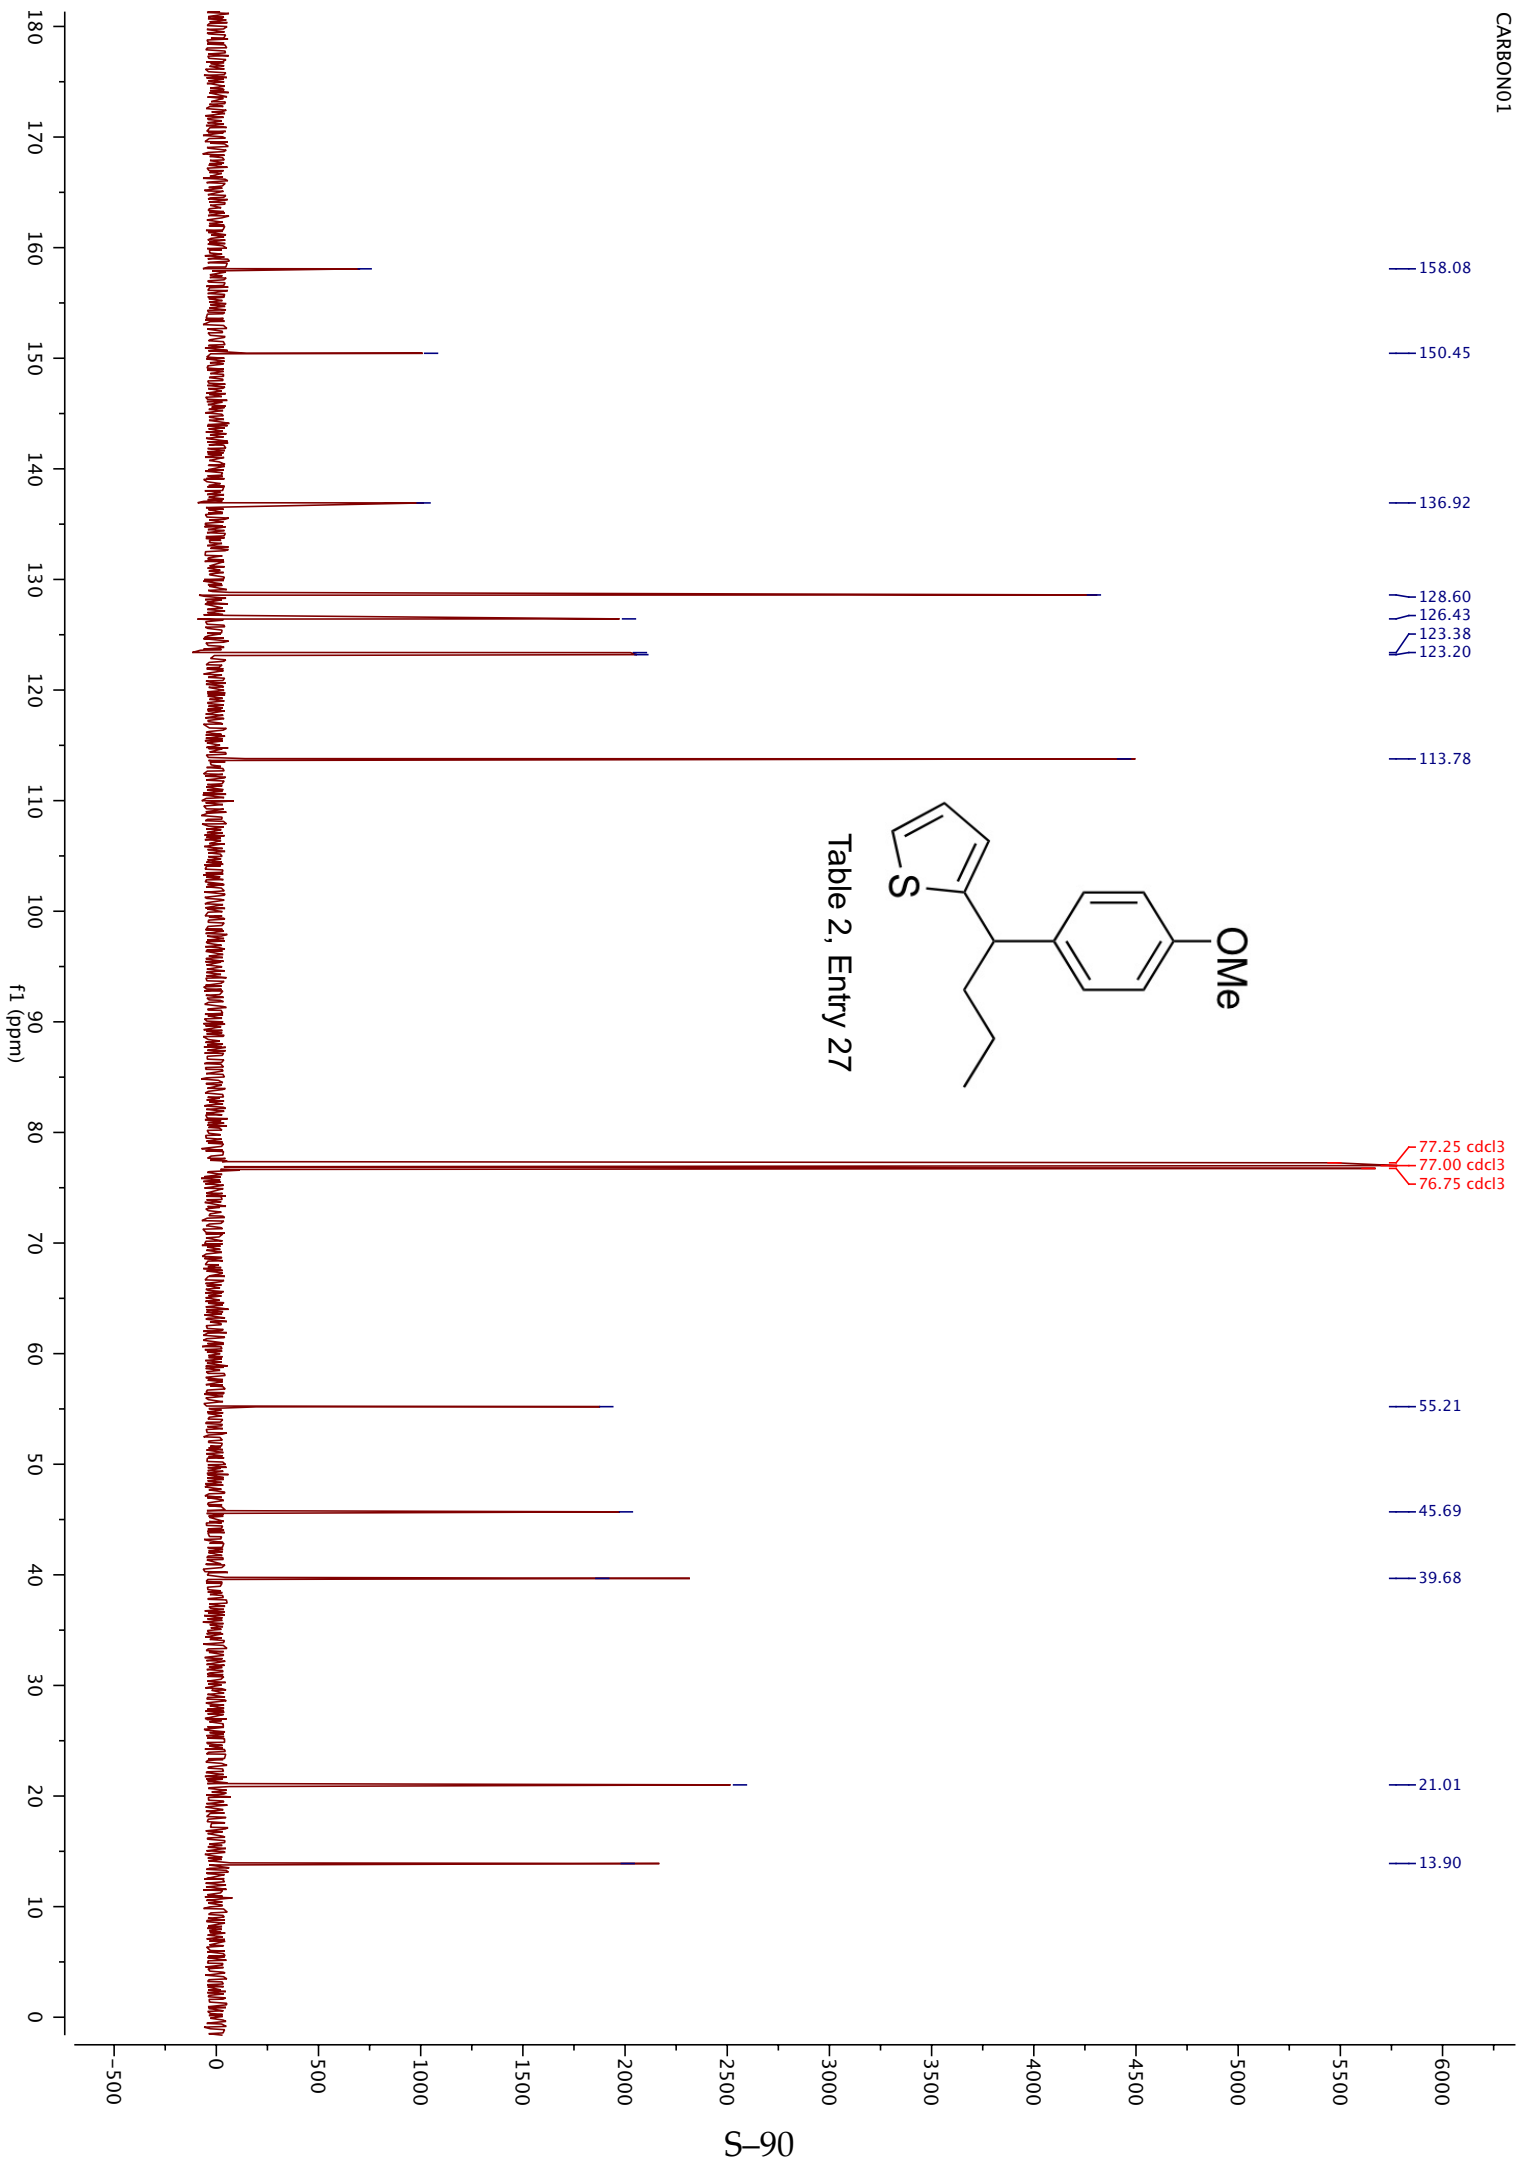

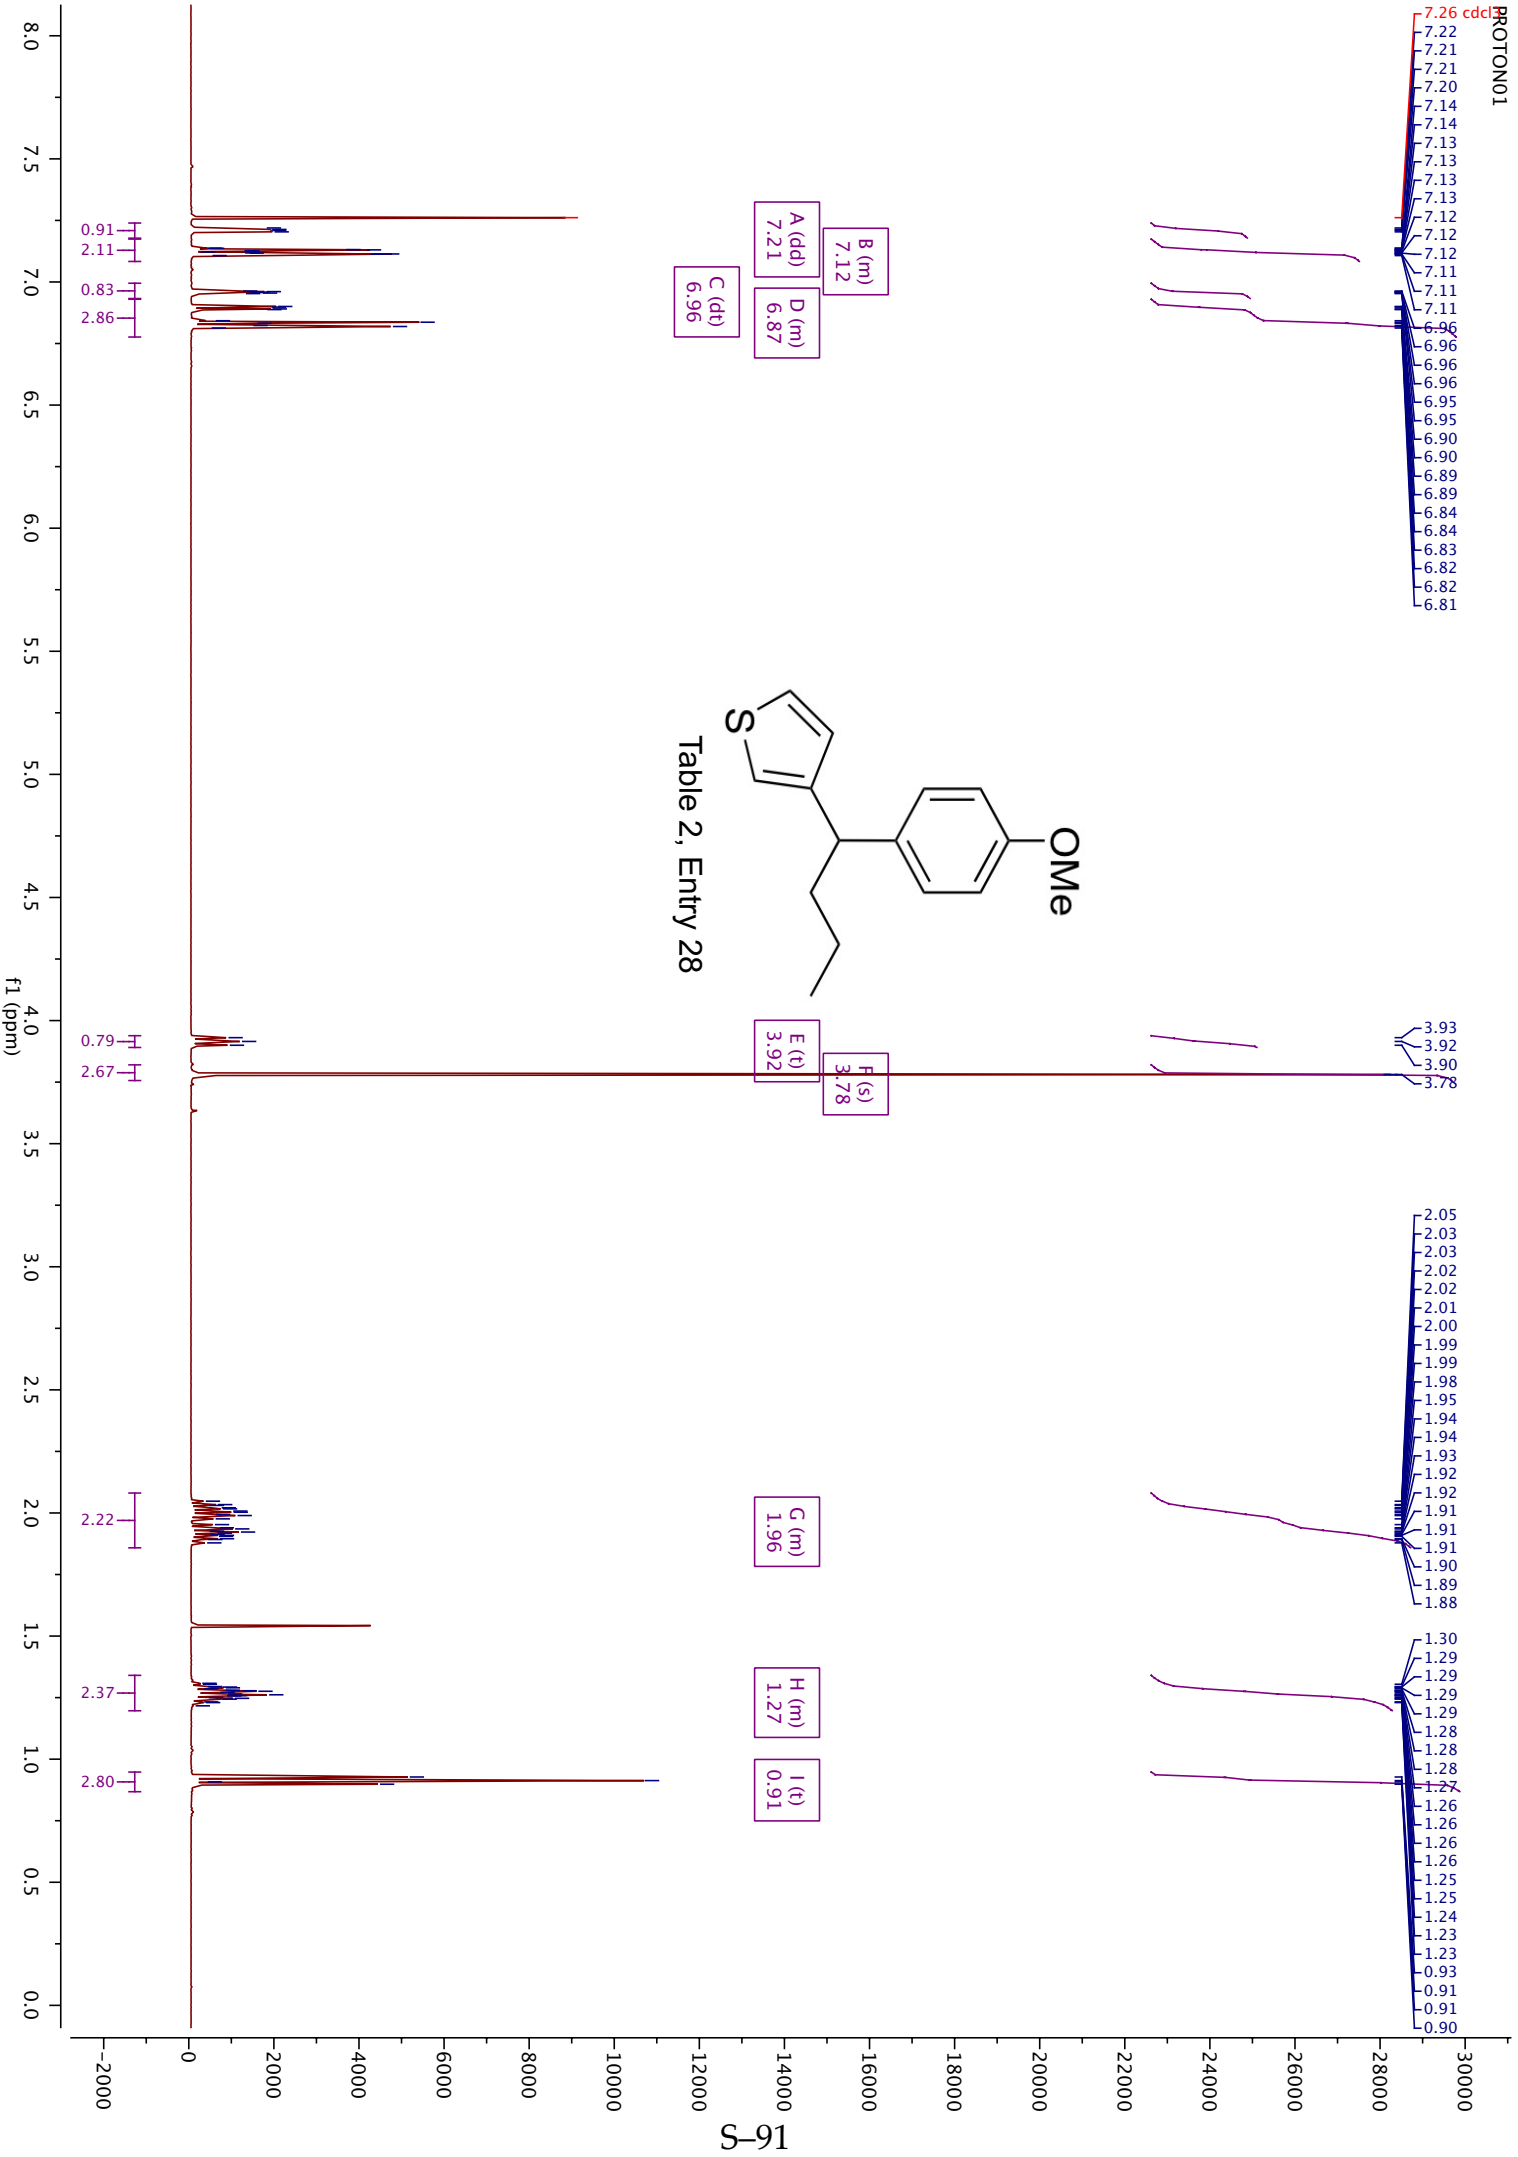

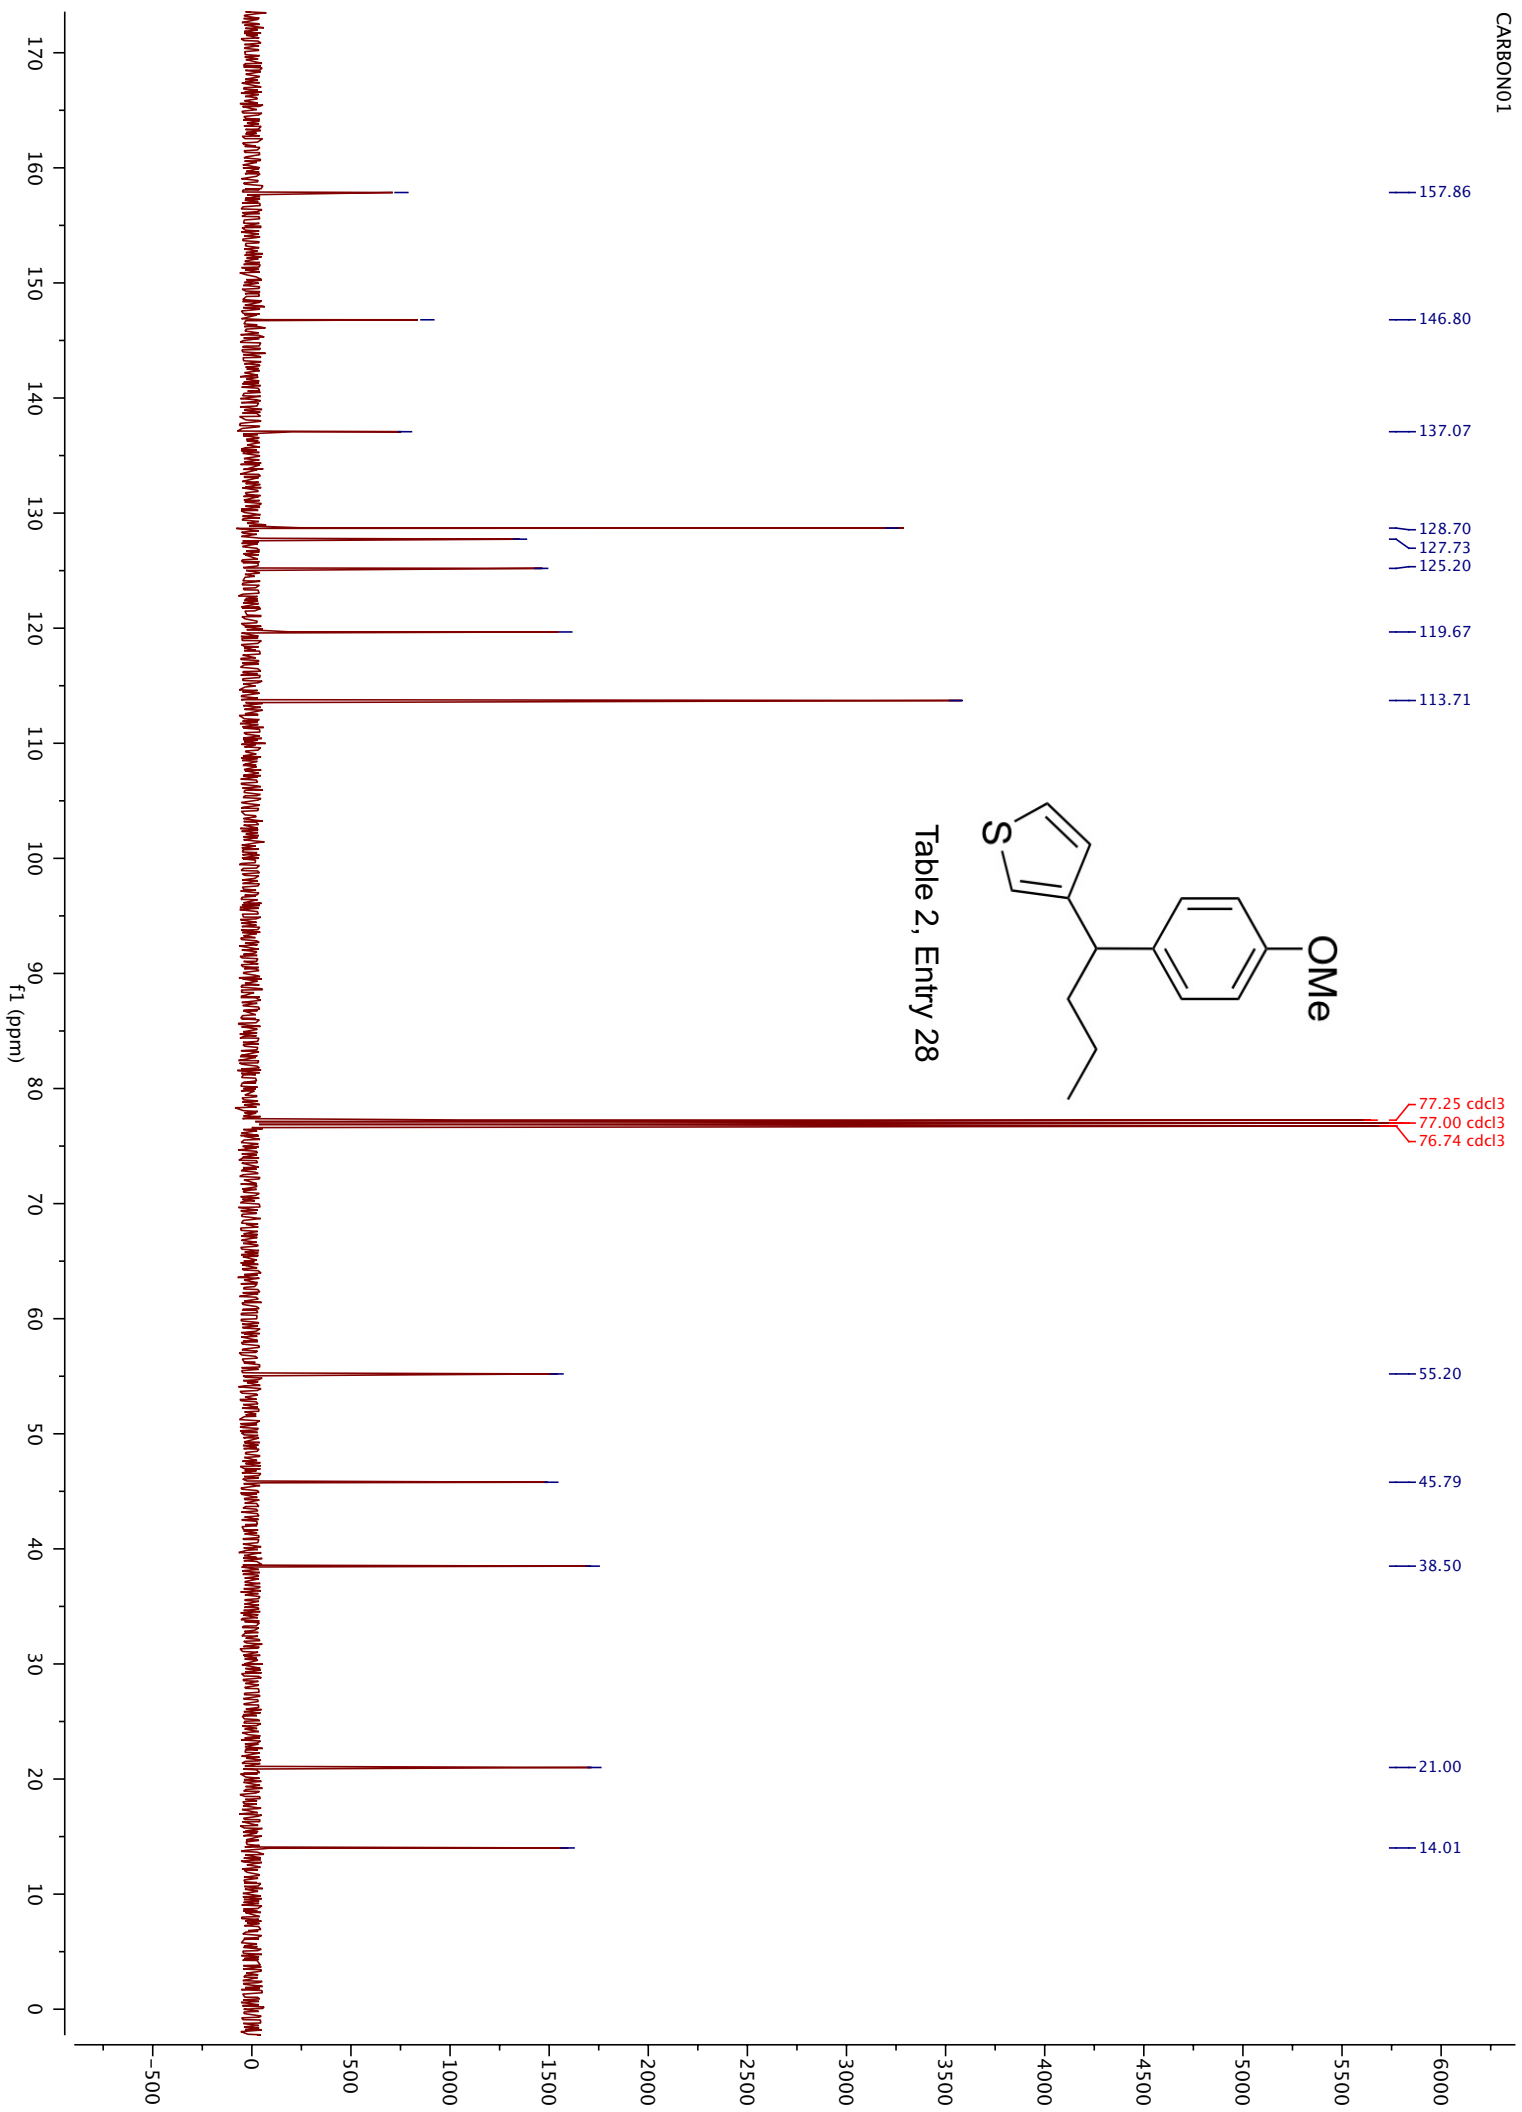

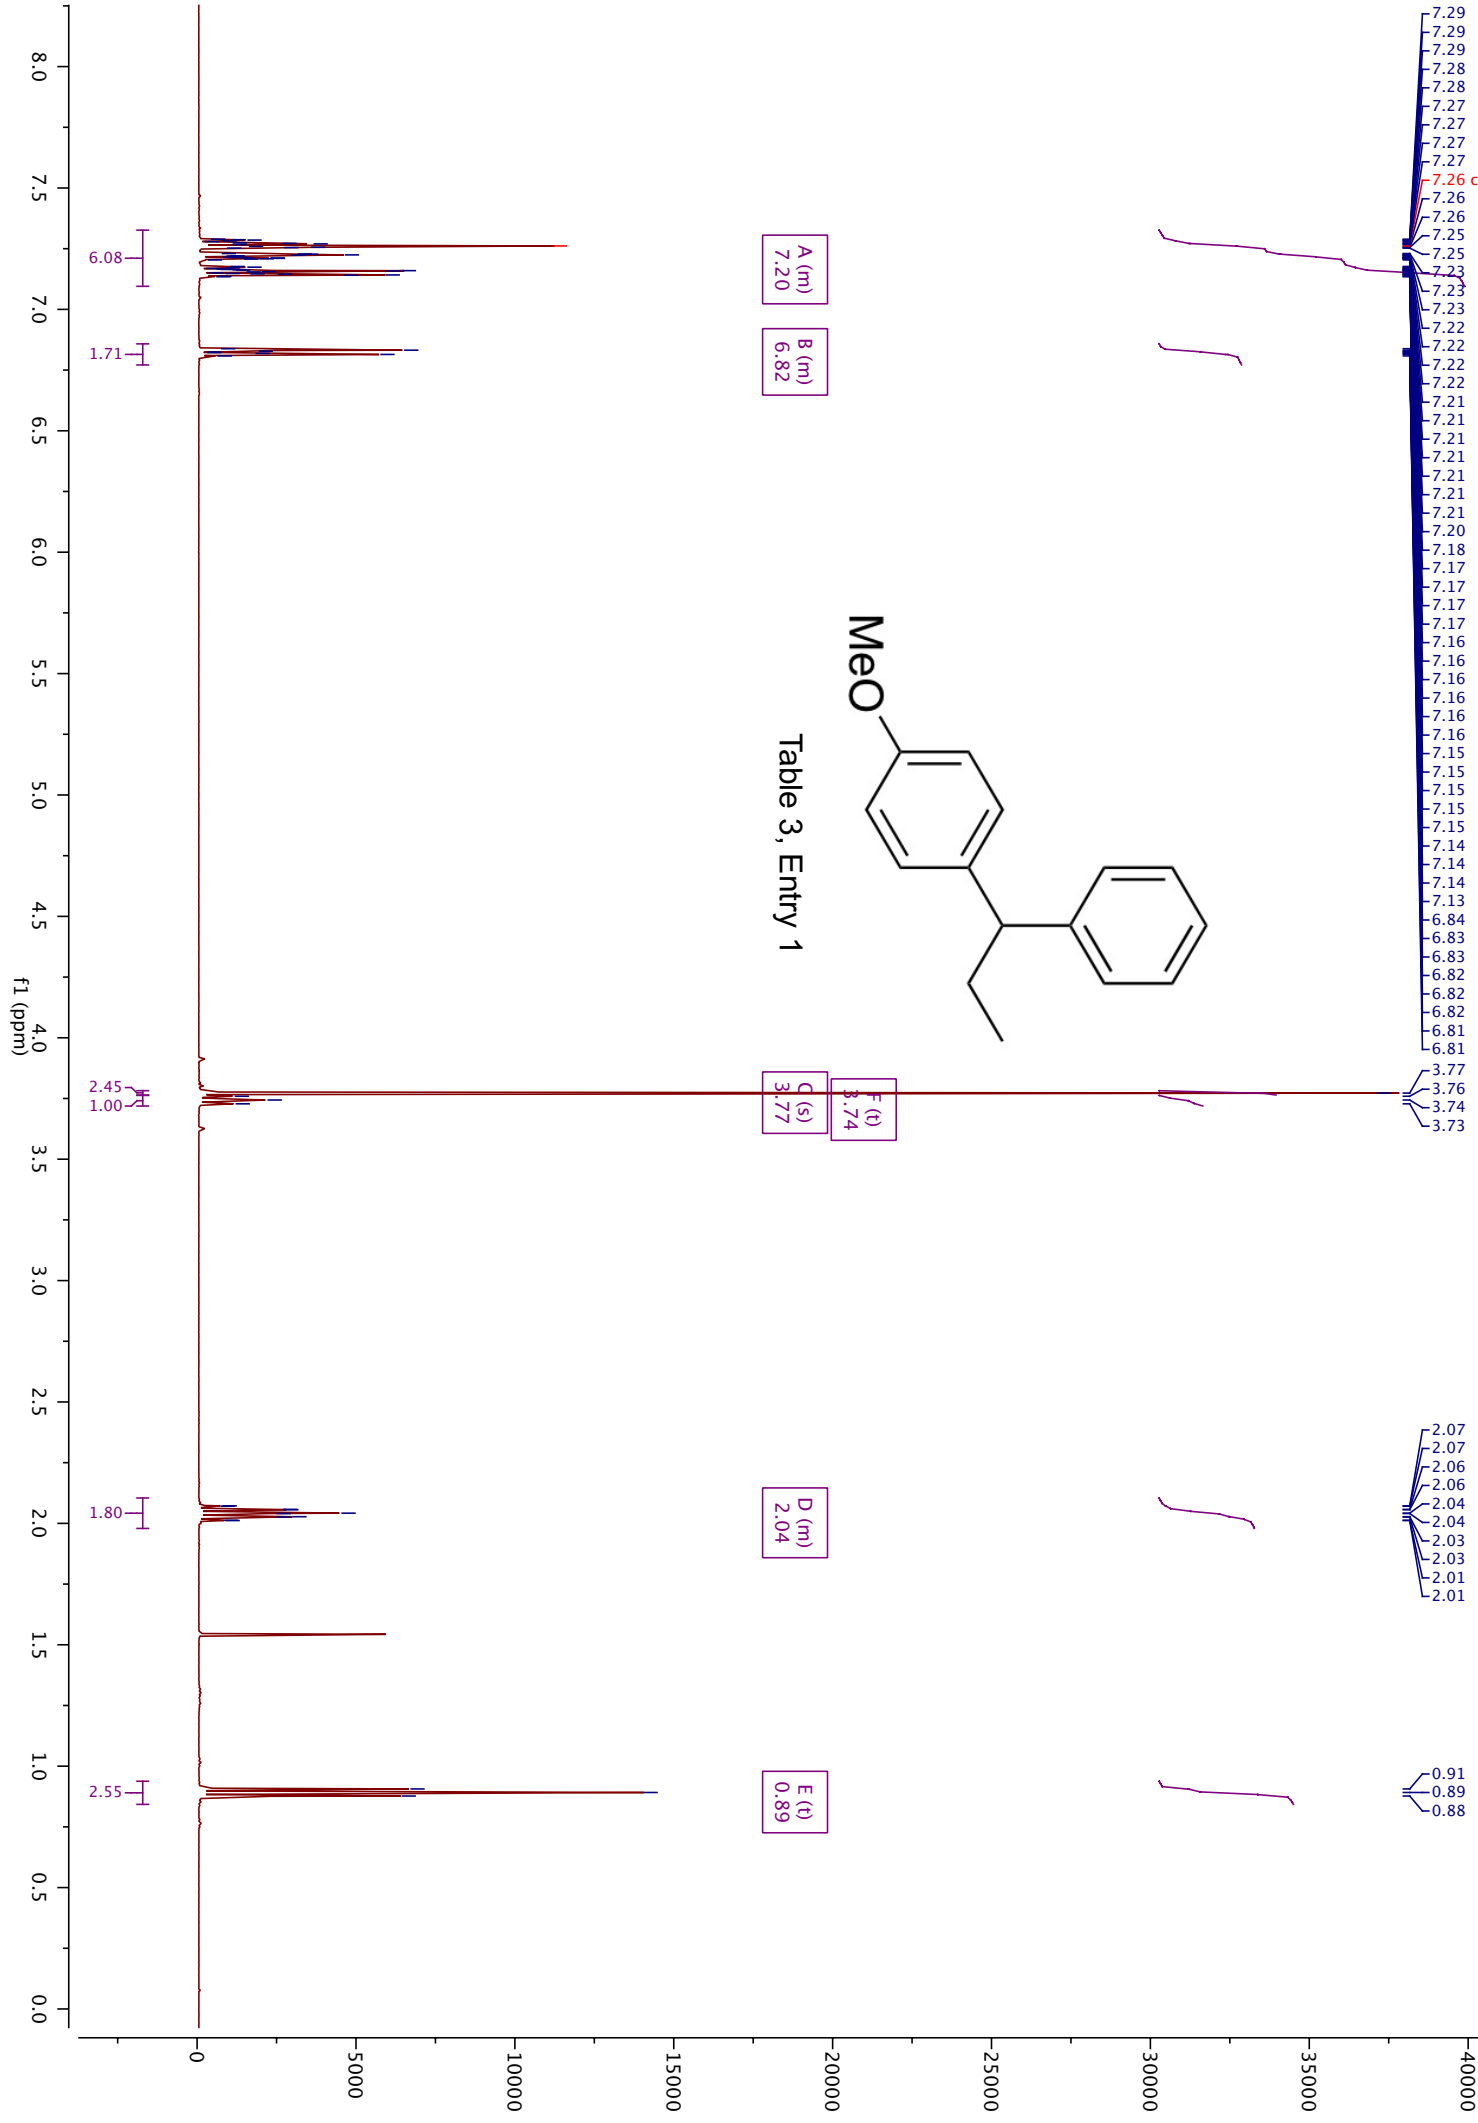

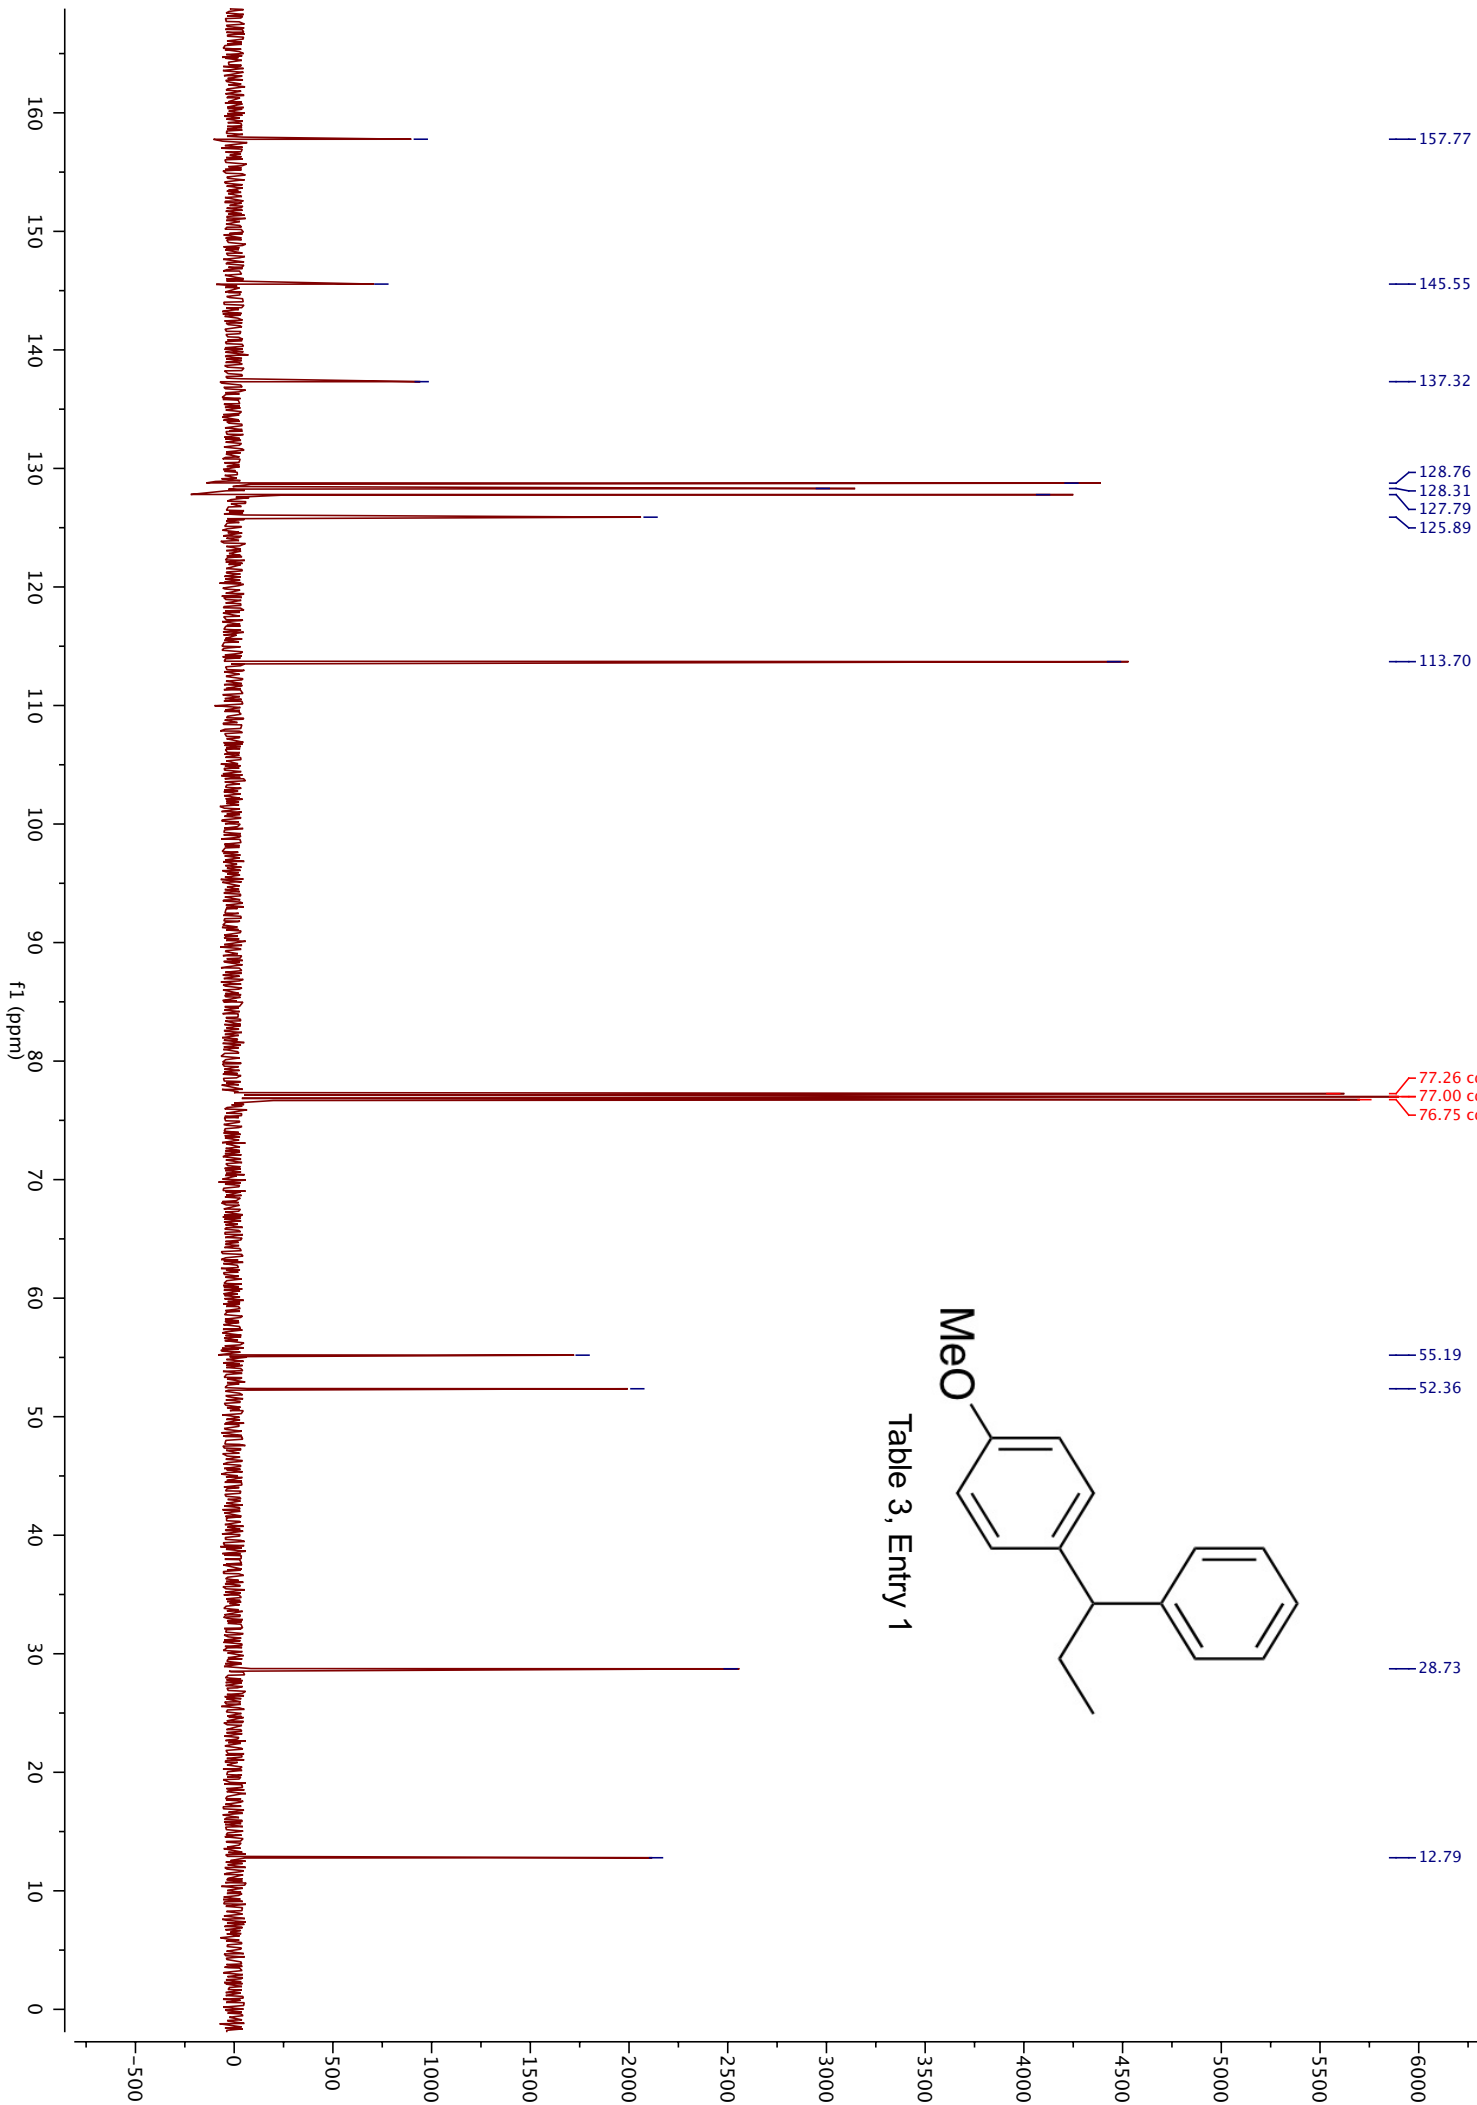

7.26 cdd  
7.15  
7.15  
7.15  
7.14  
7.14  
7.13  
7.13  
7.13  
7.12  
7.12  
7.11  
7.10  
7.10  
7.09  
7.09  
7.09  
7.08  
7.08  
7.07  
7.07  
7.07  
7.07  
6.83  
6.82  
6.81  
6.81  
6.80

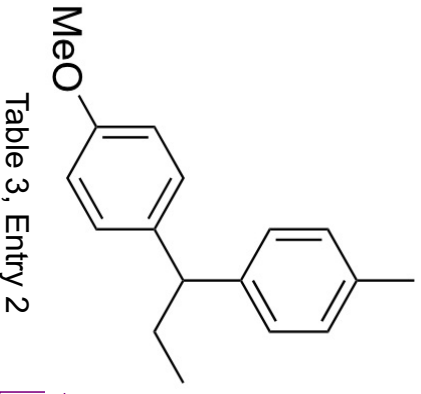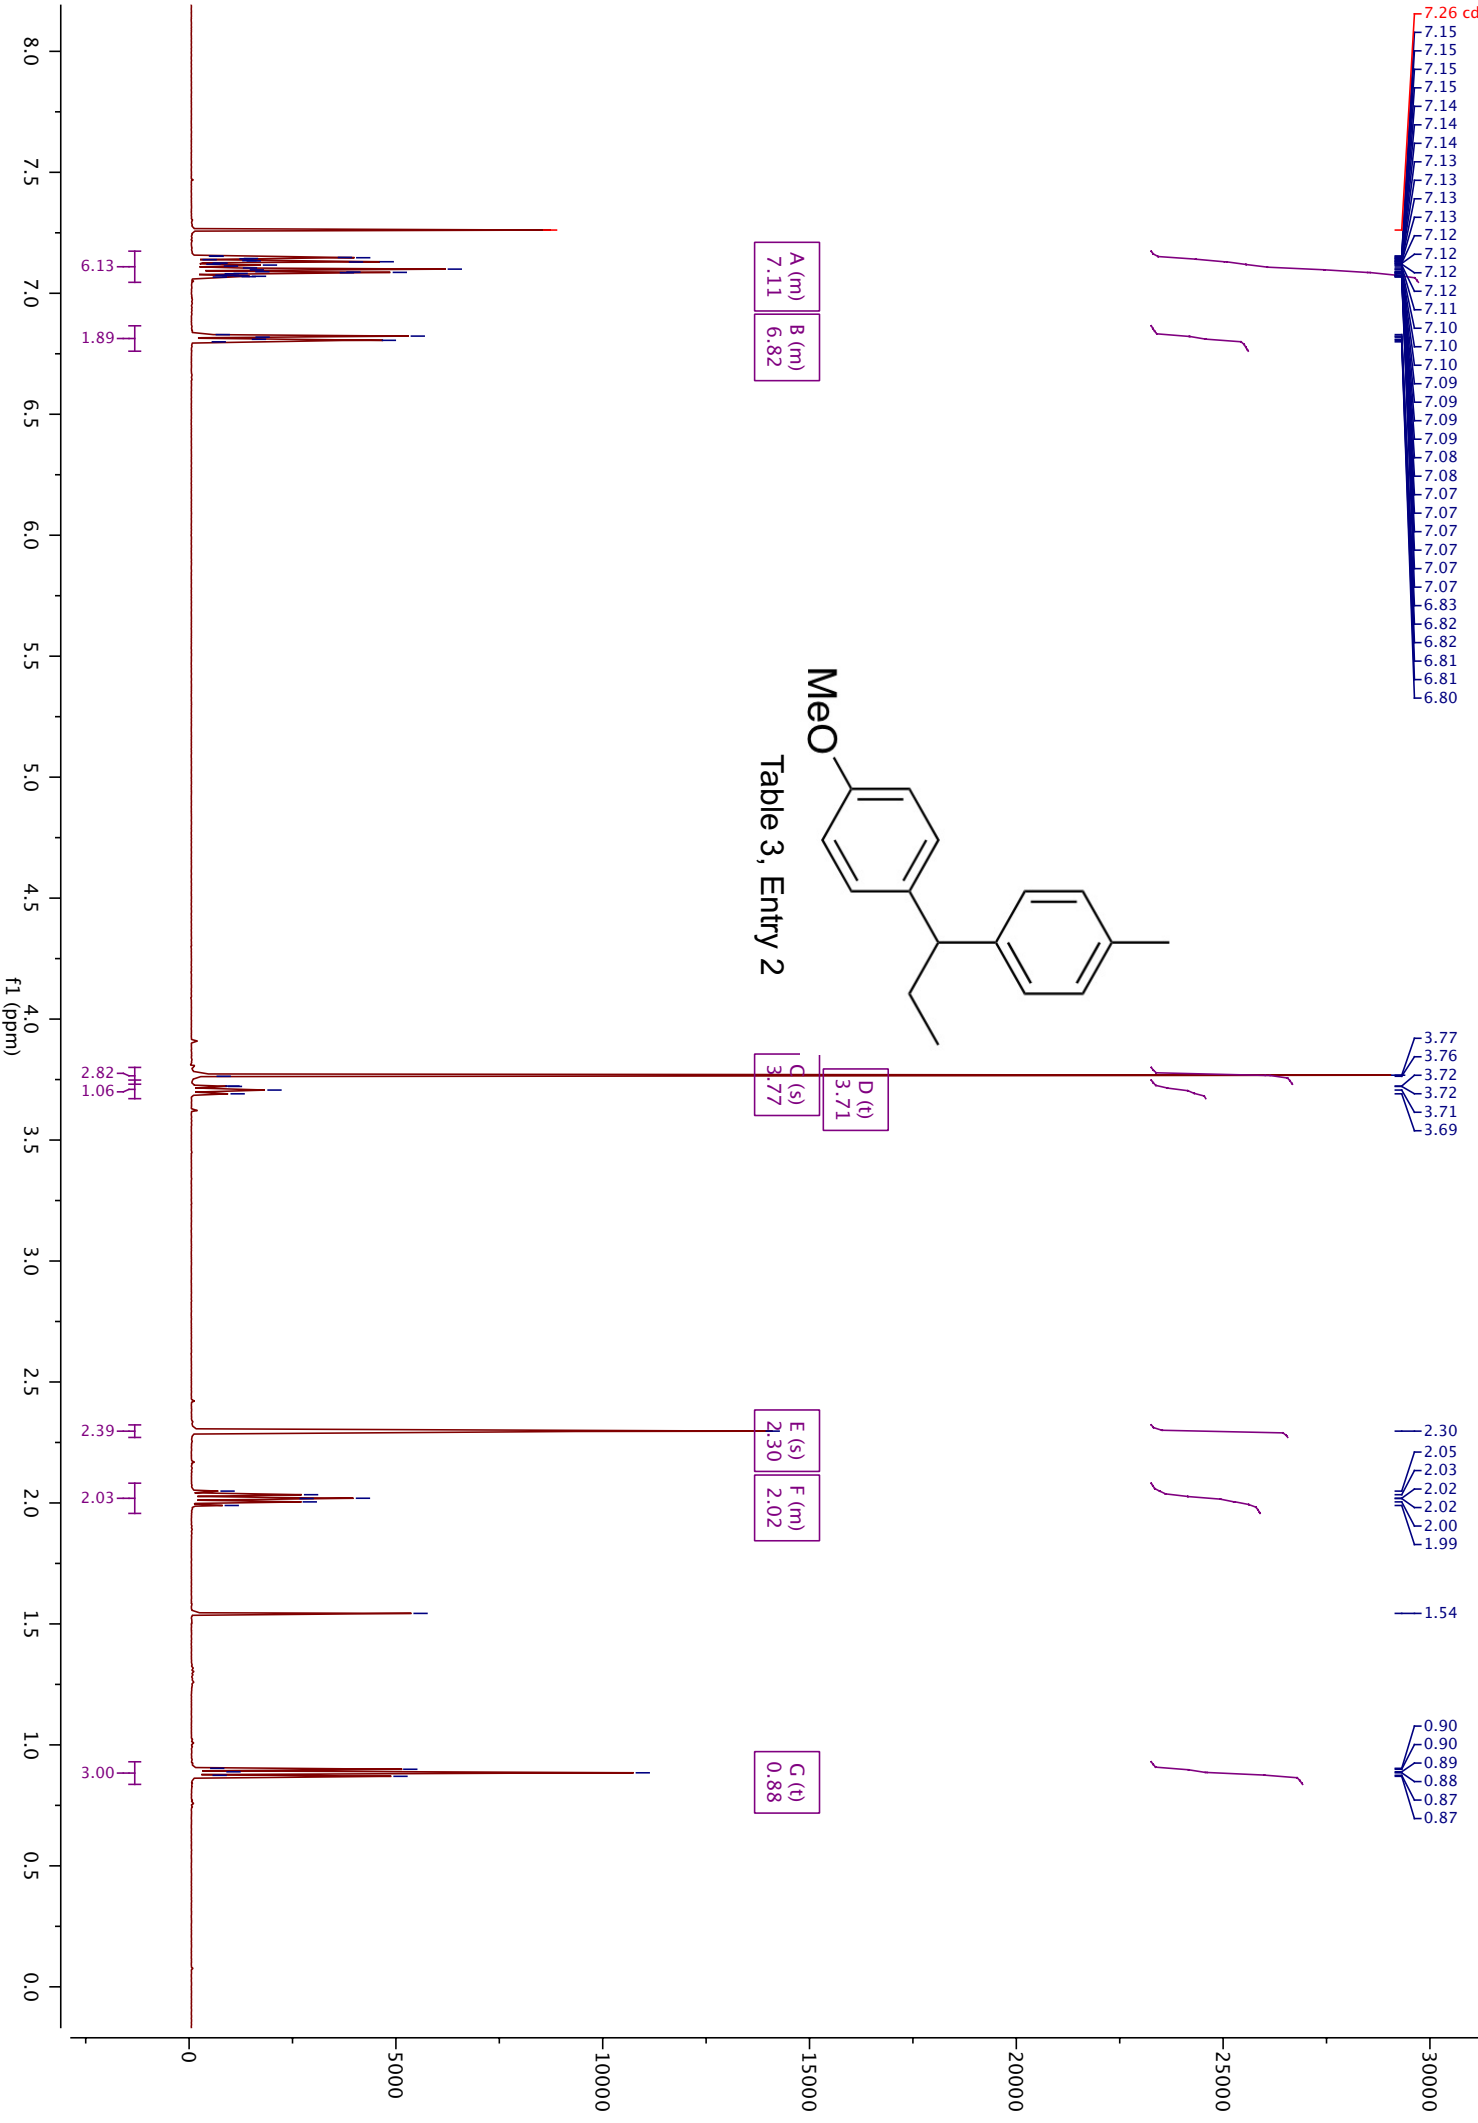

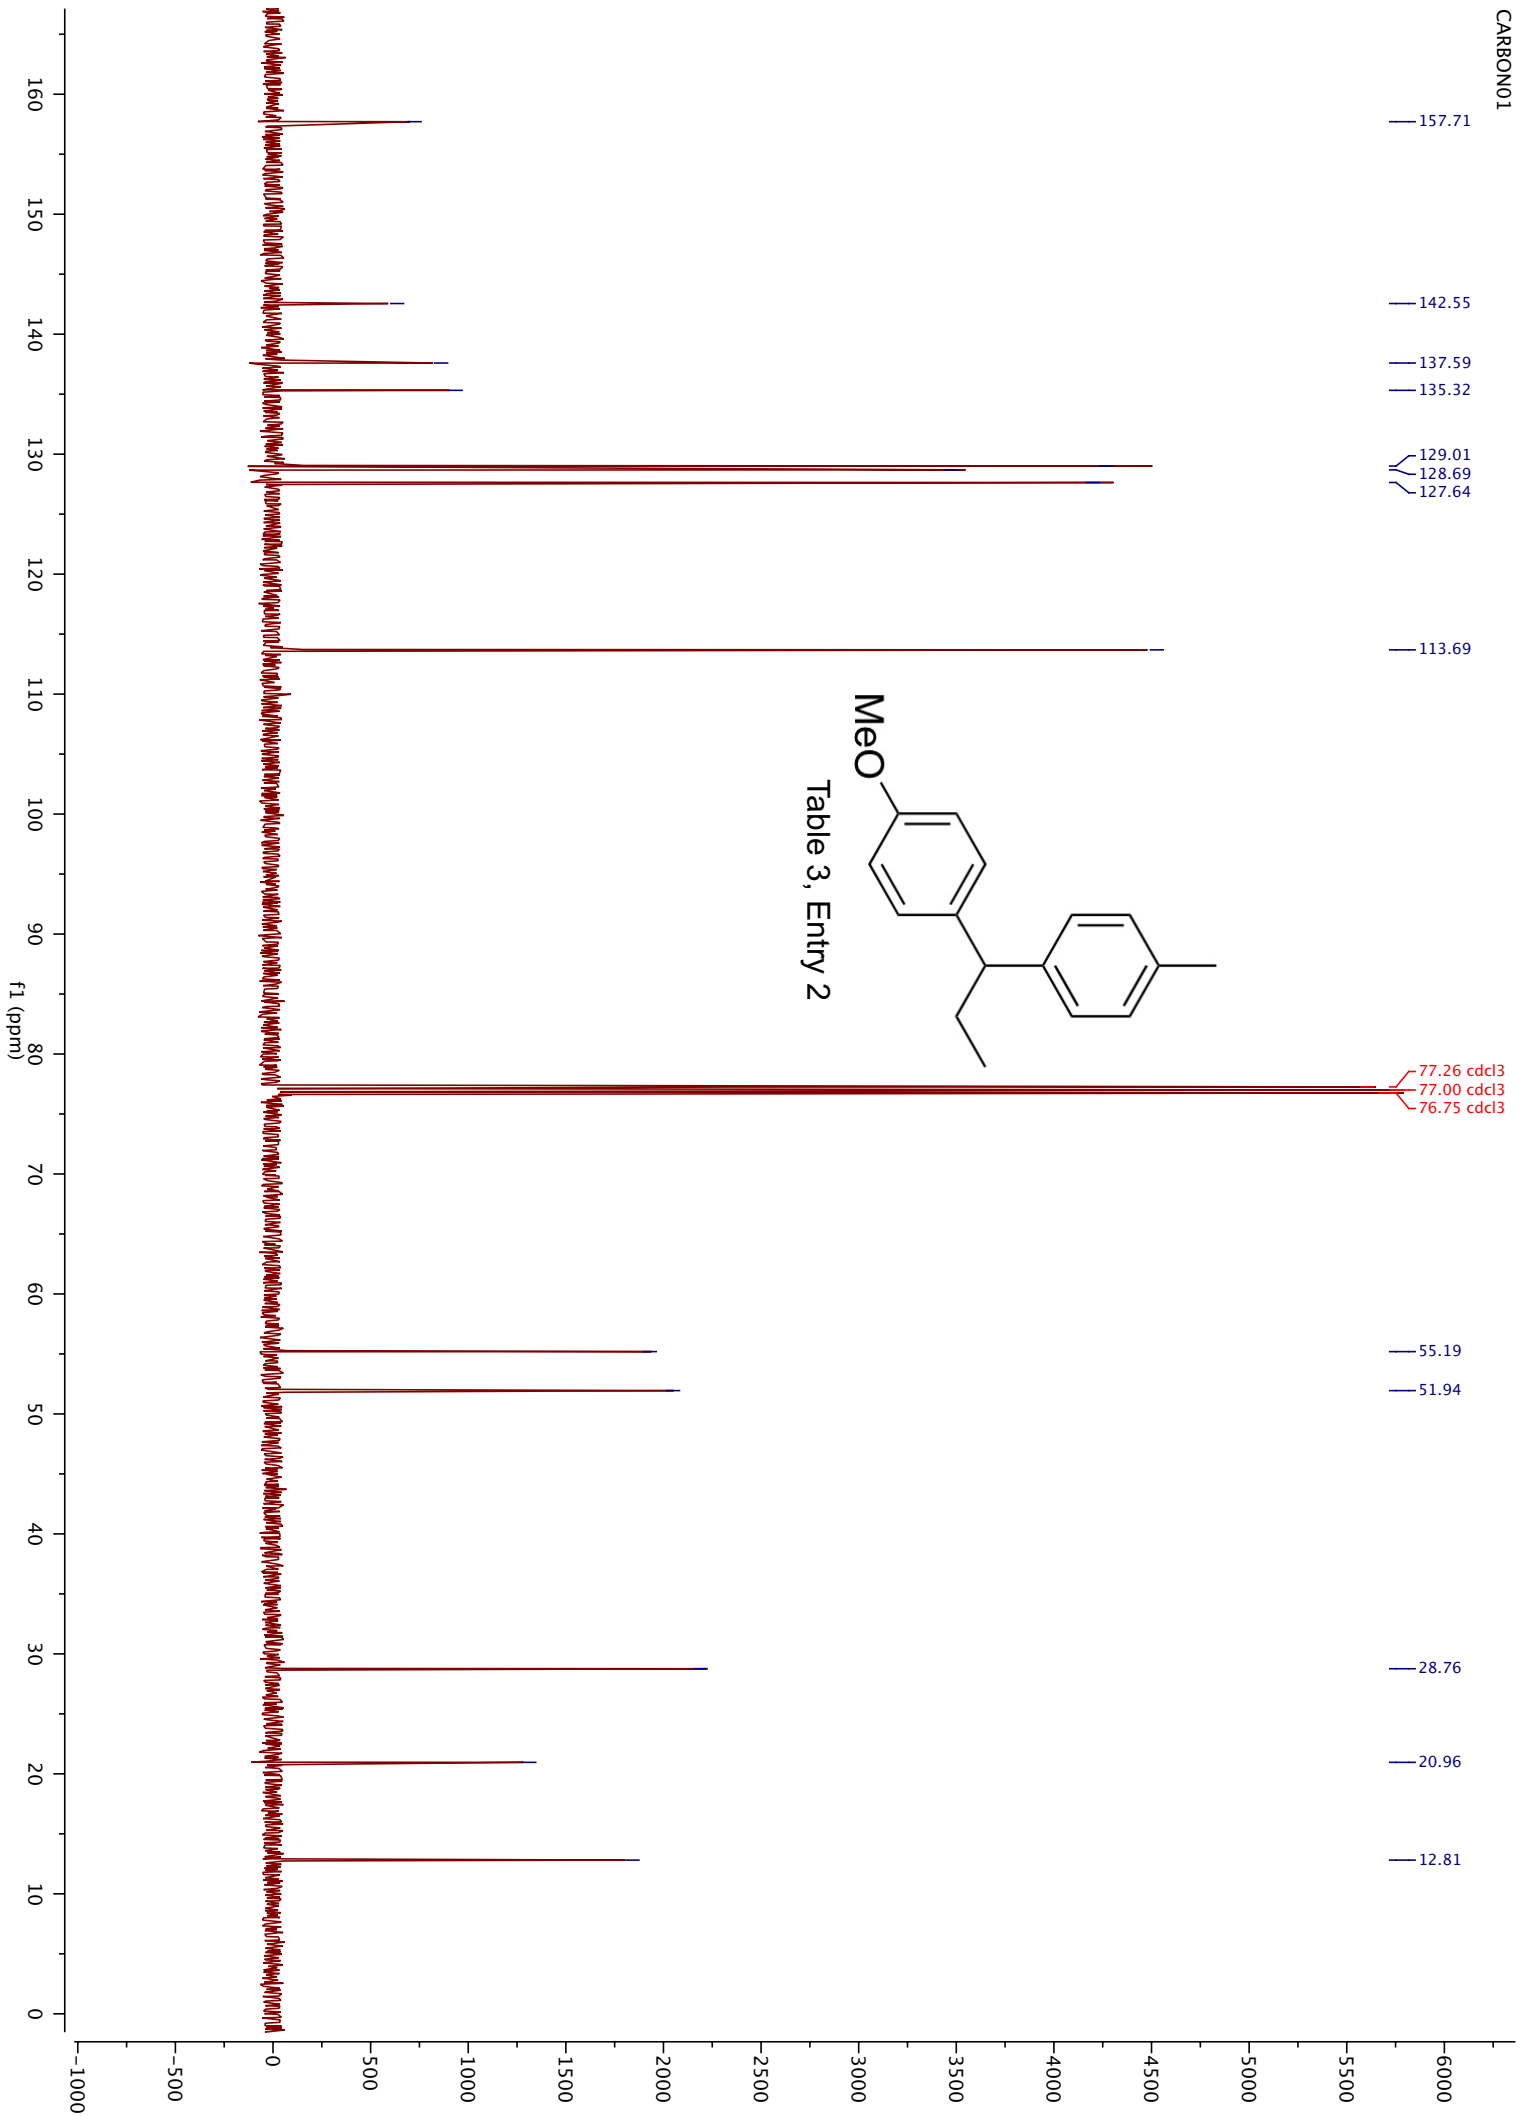



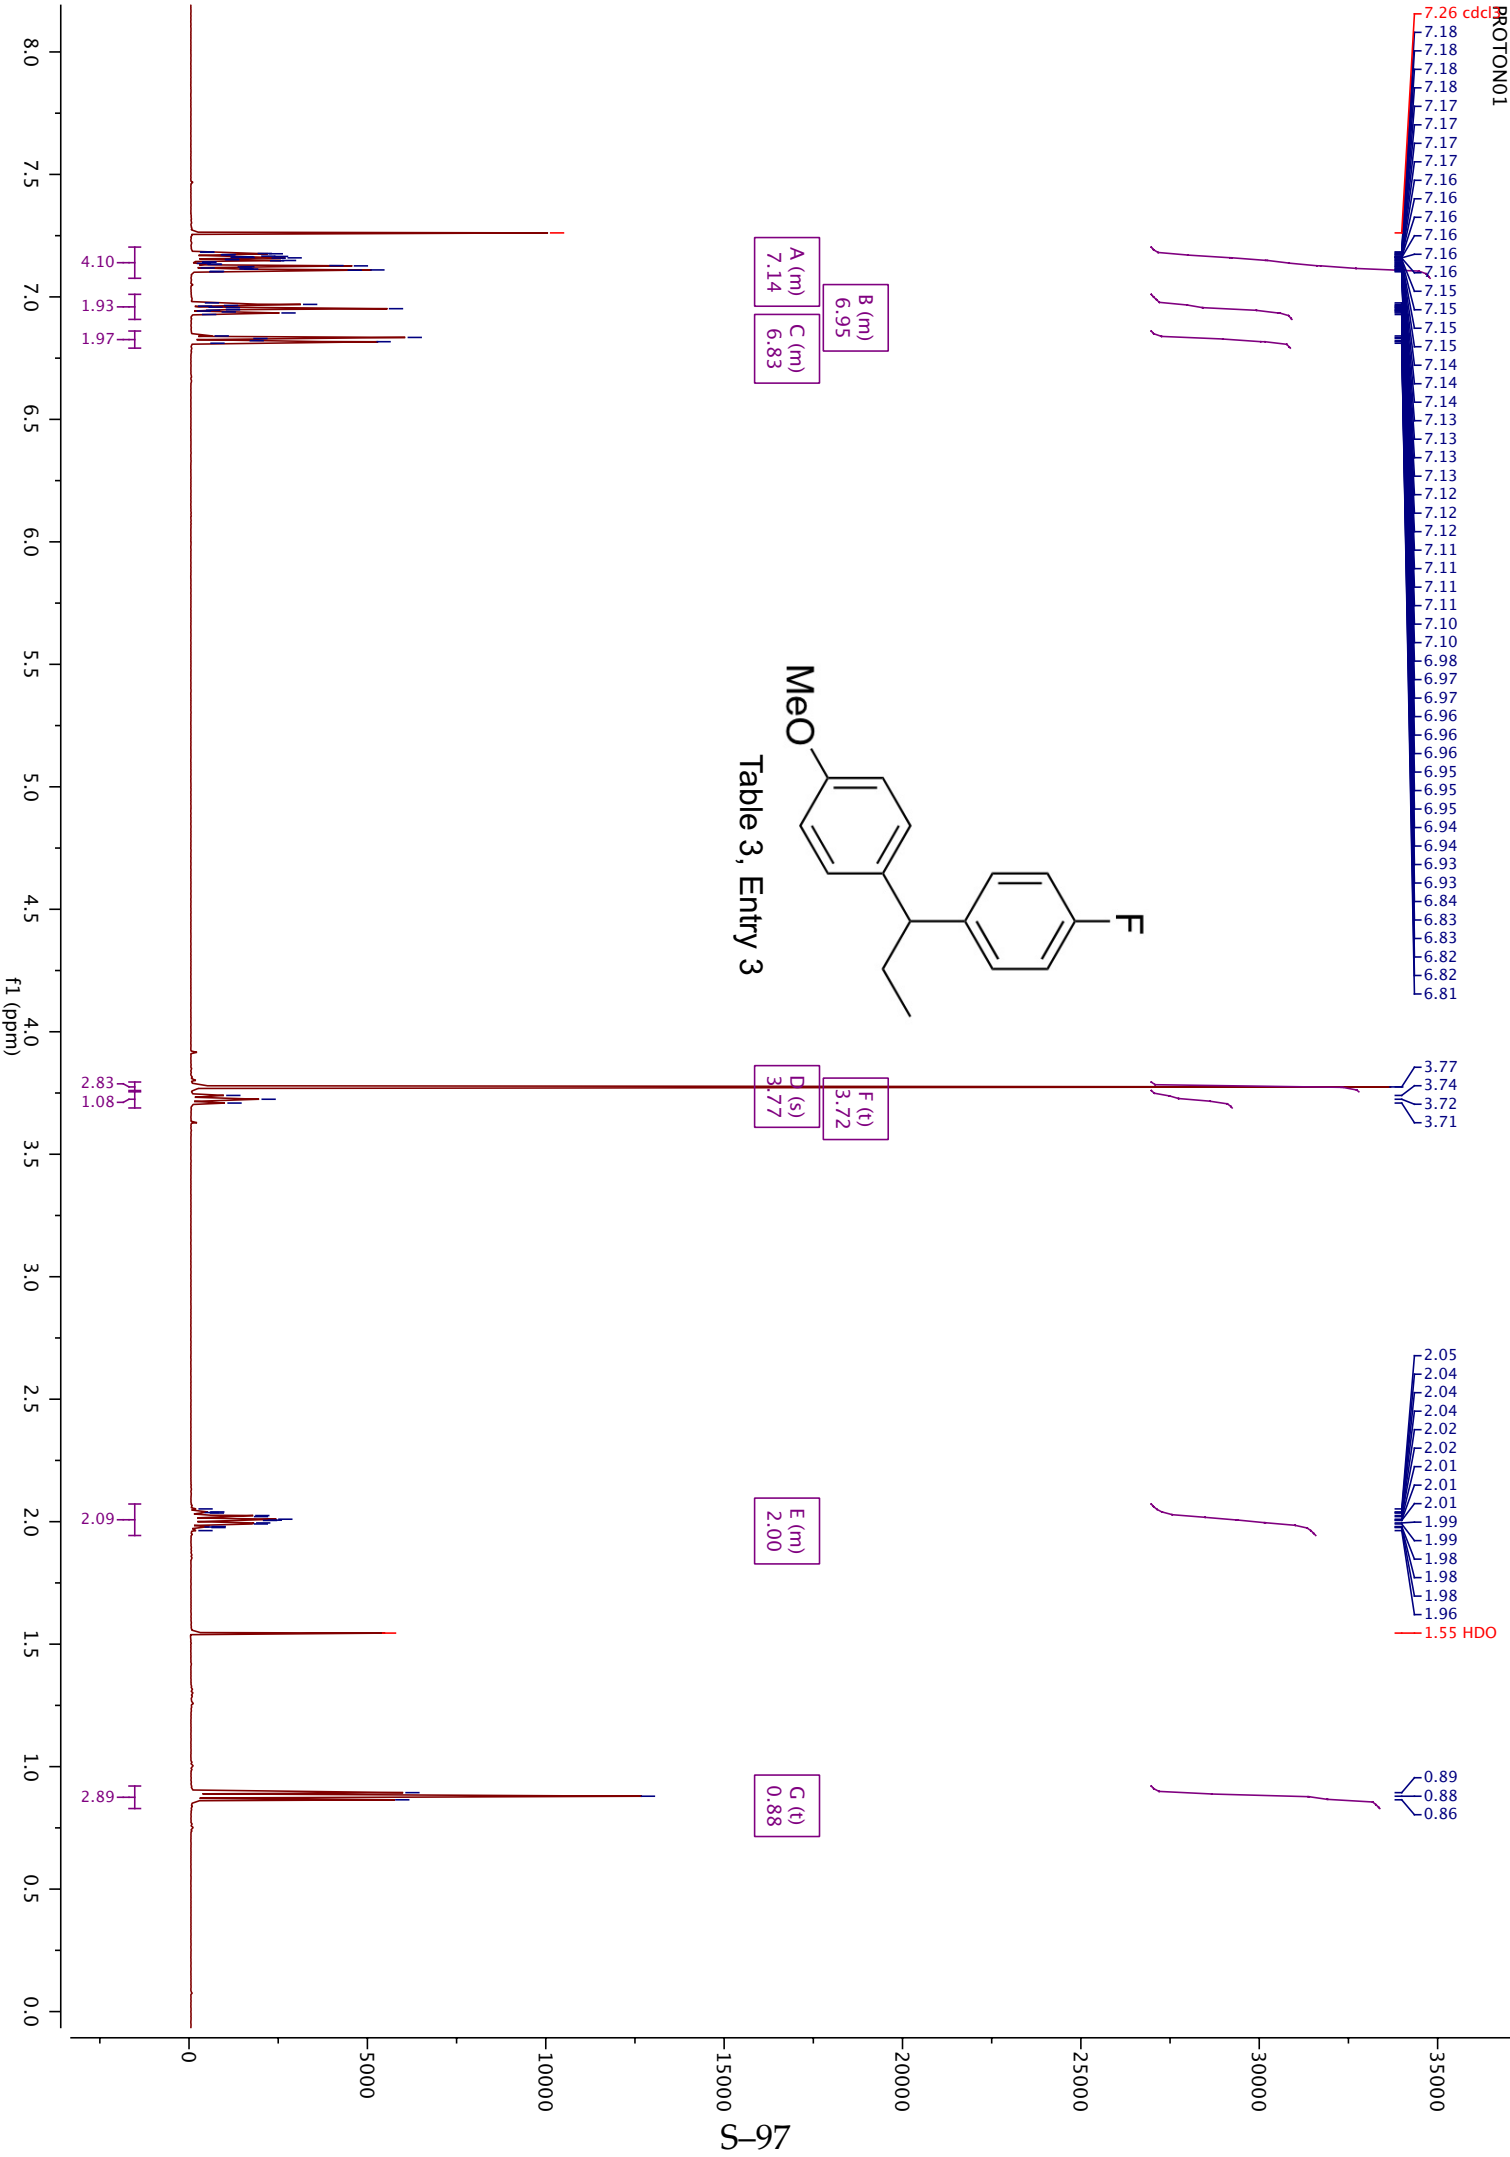

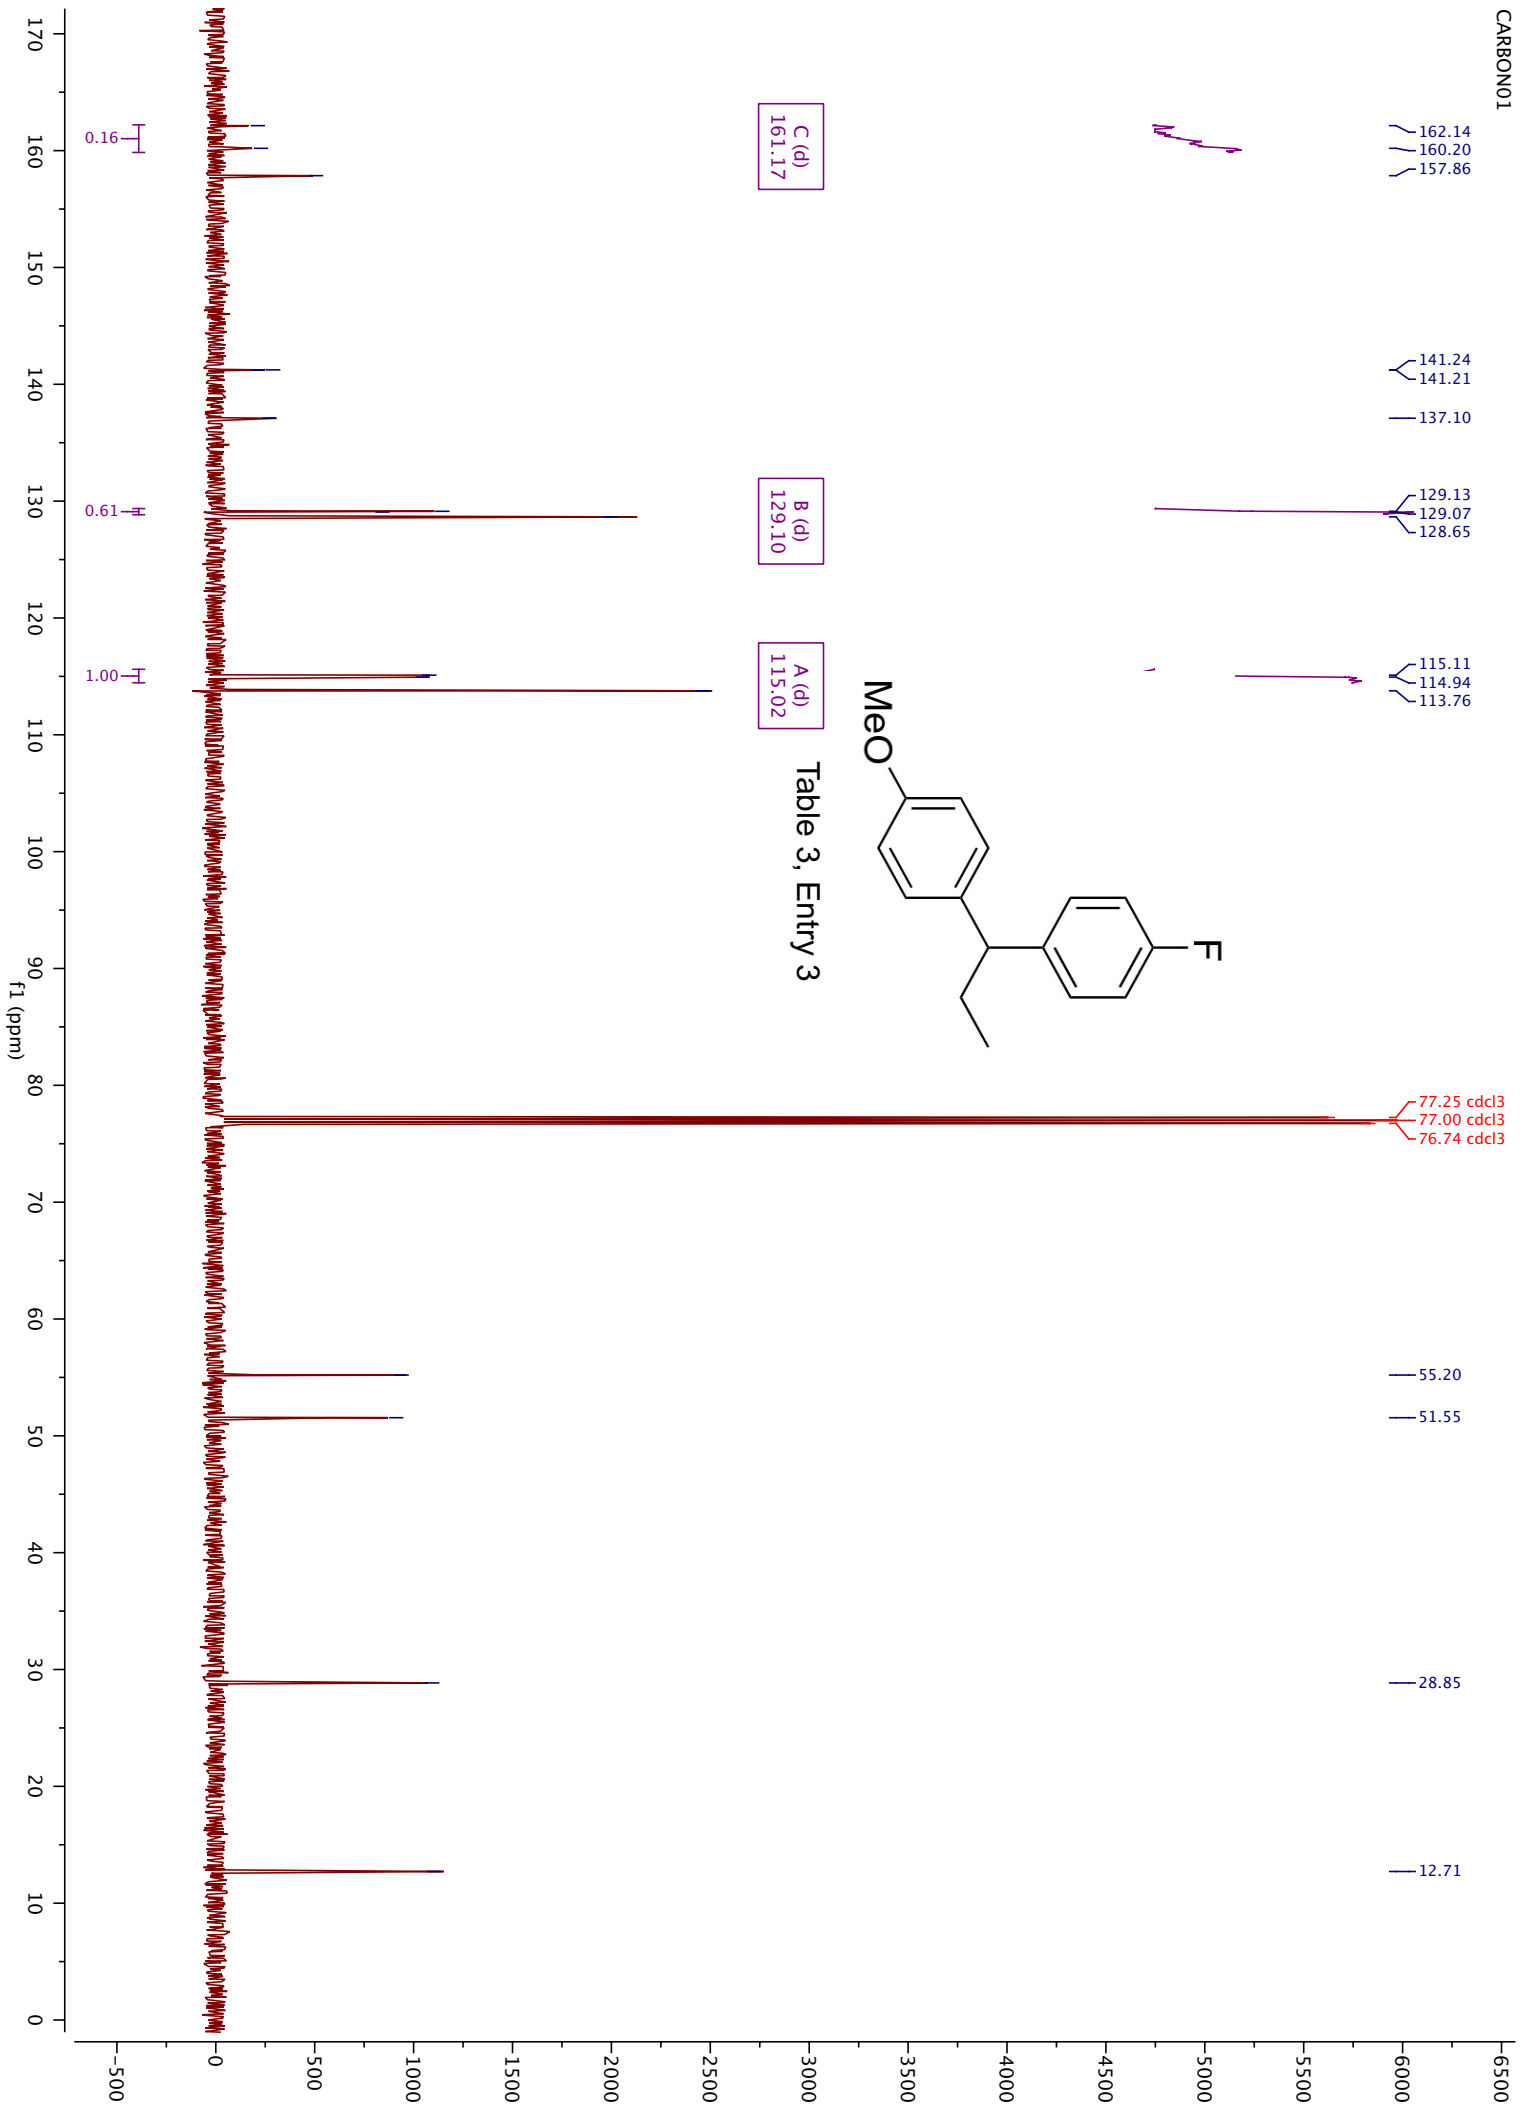

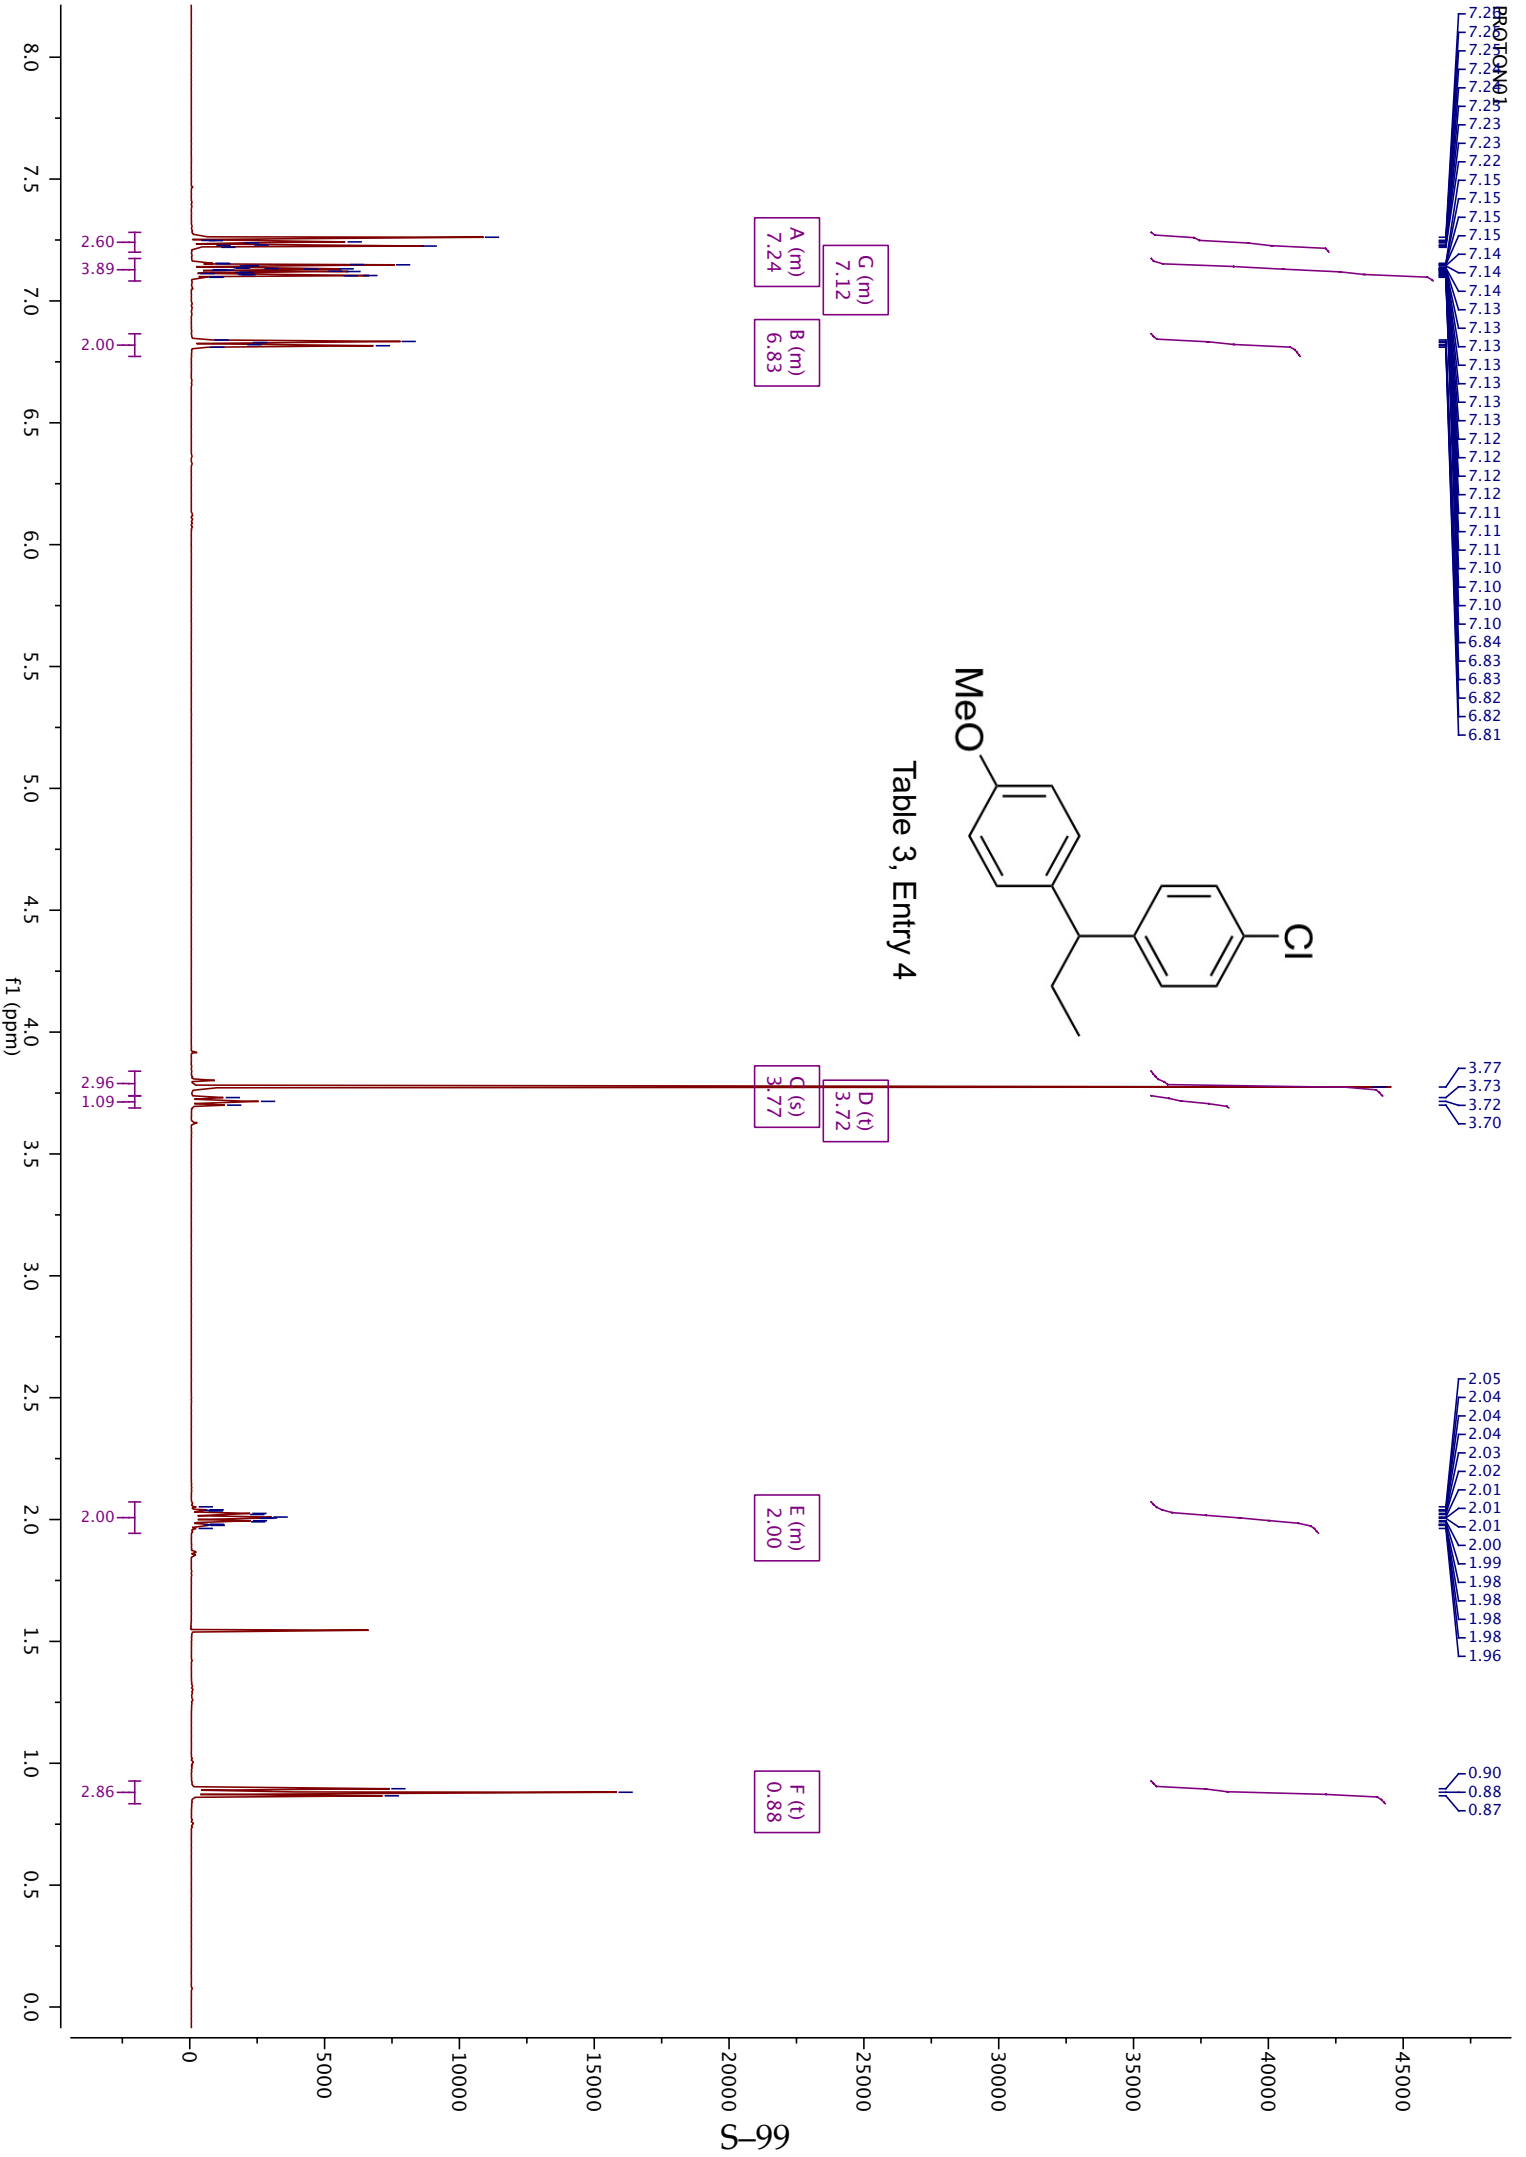

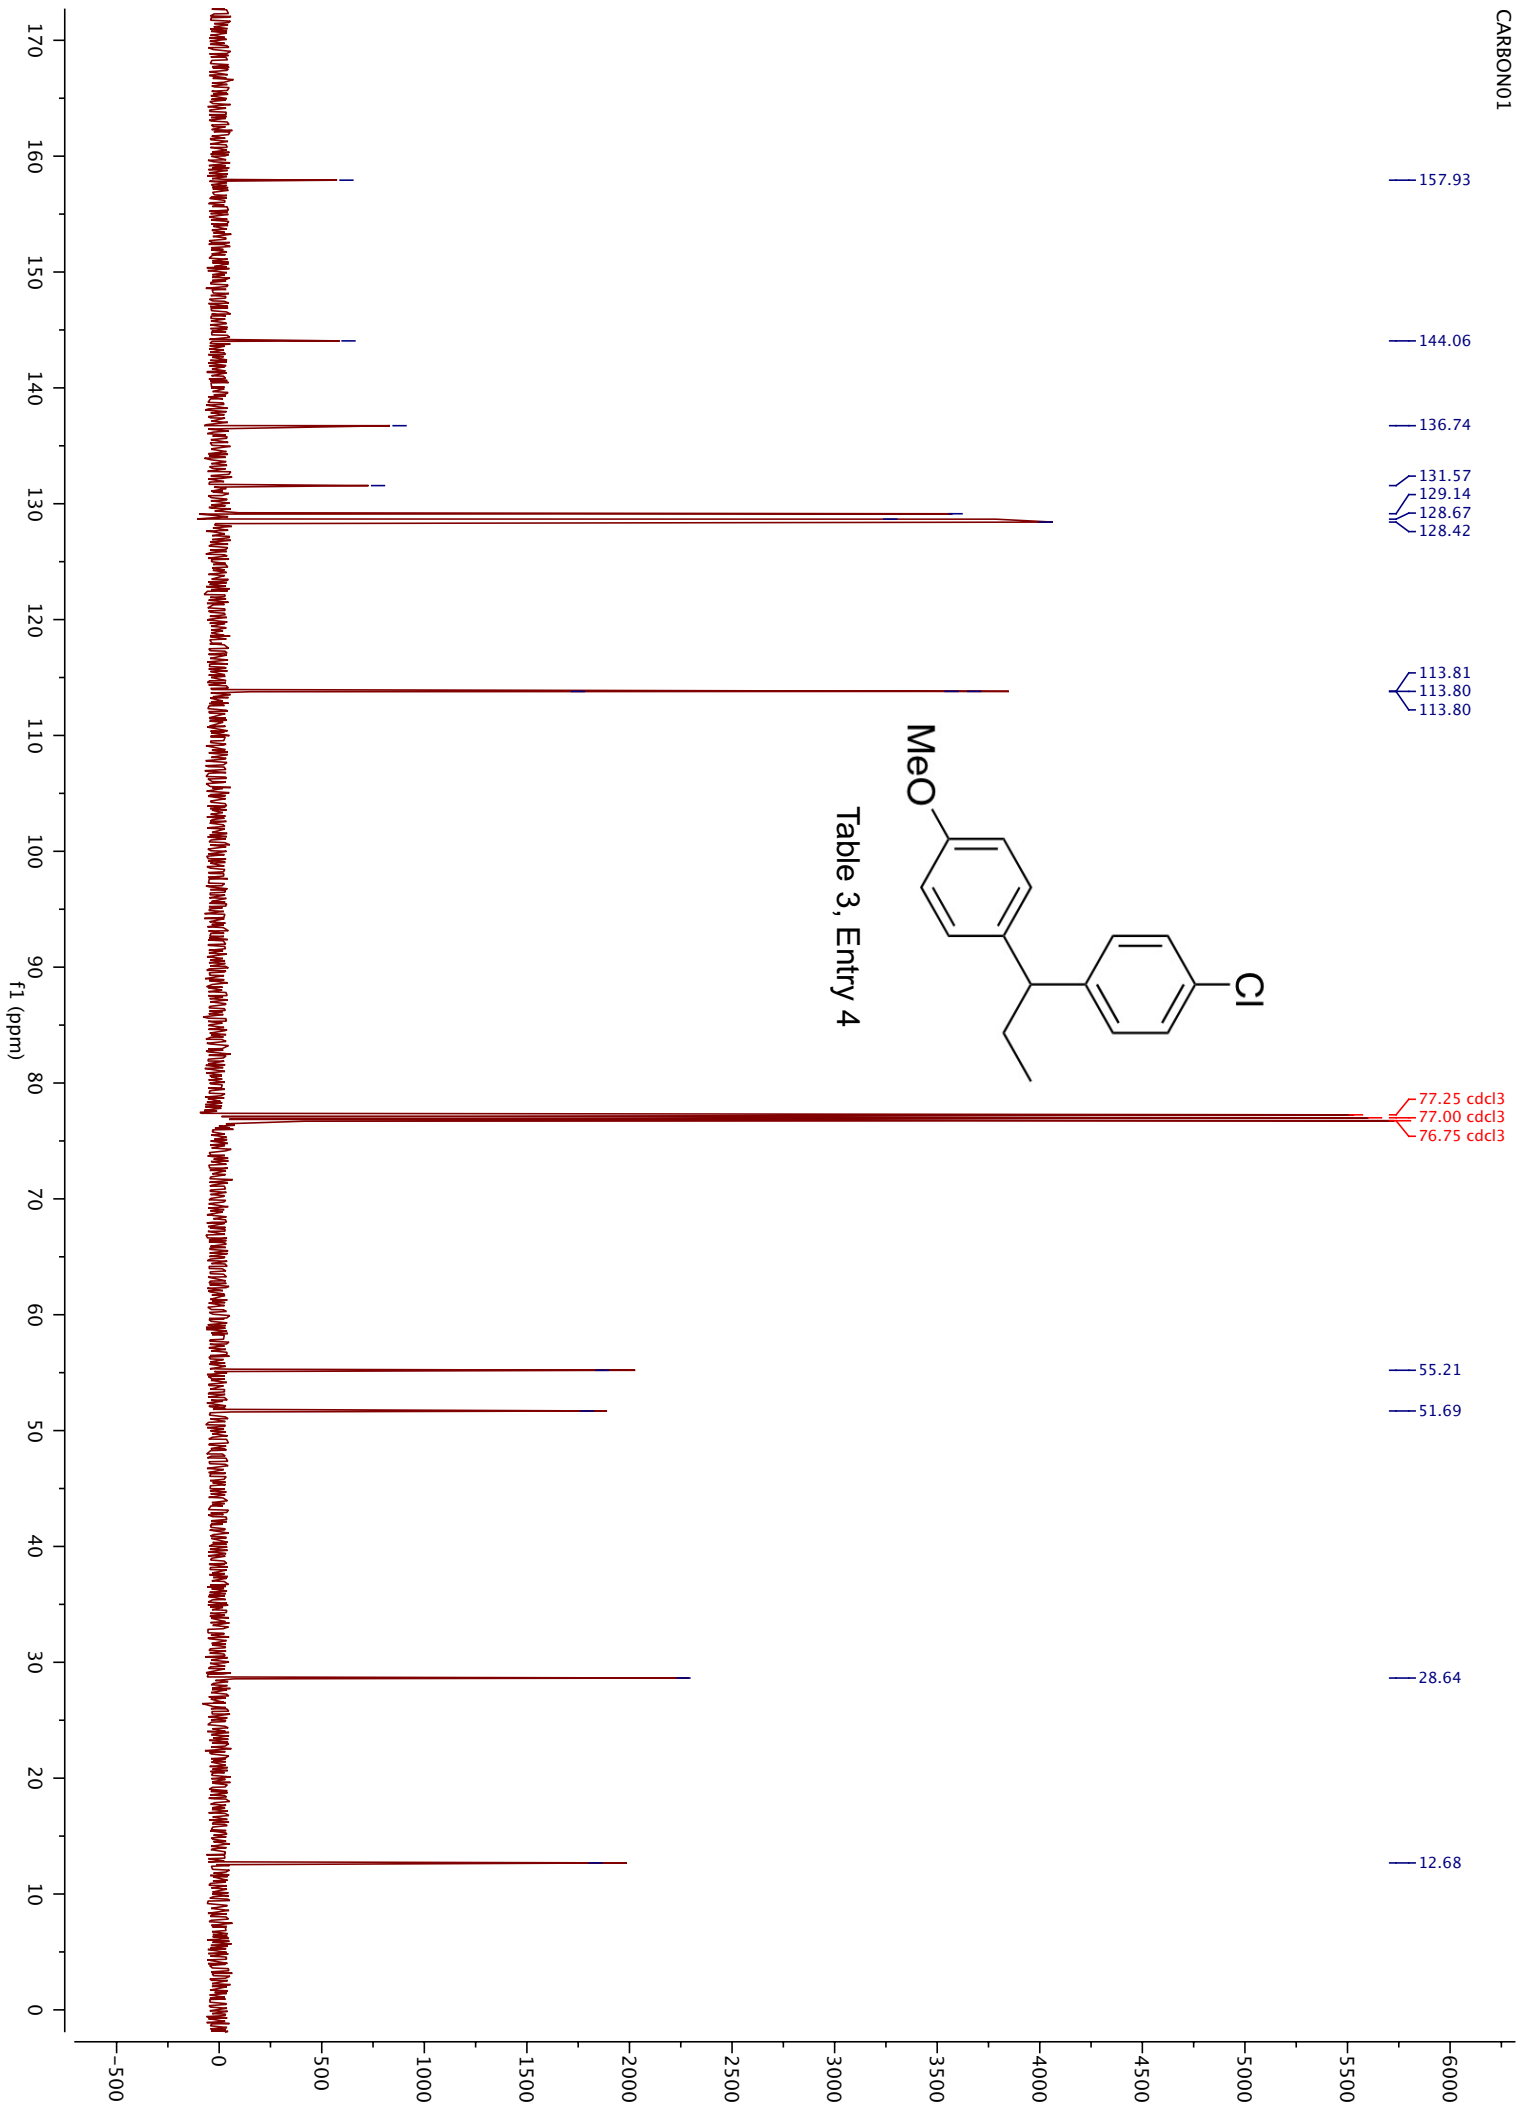

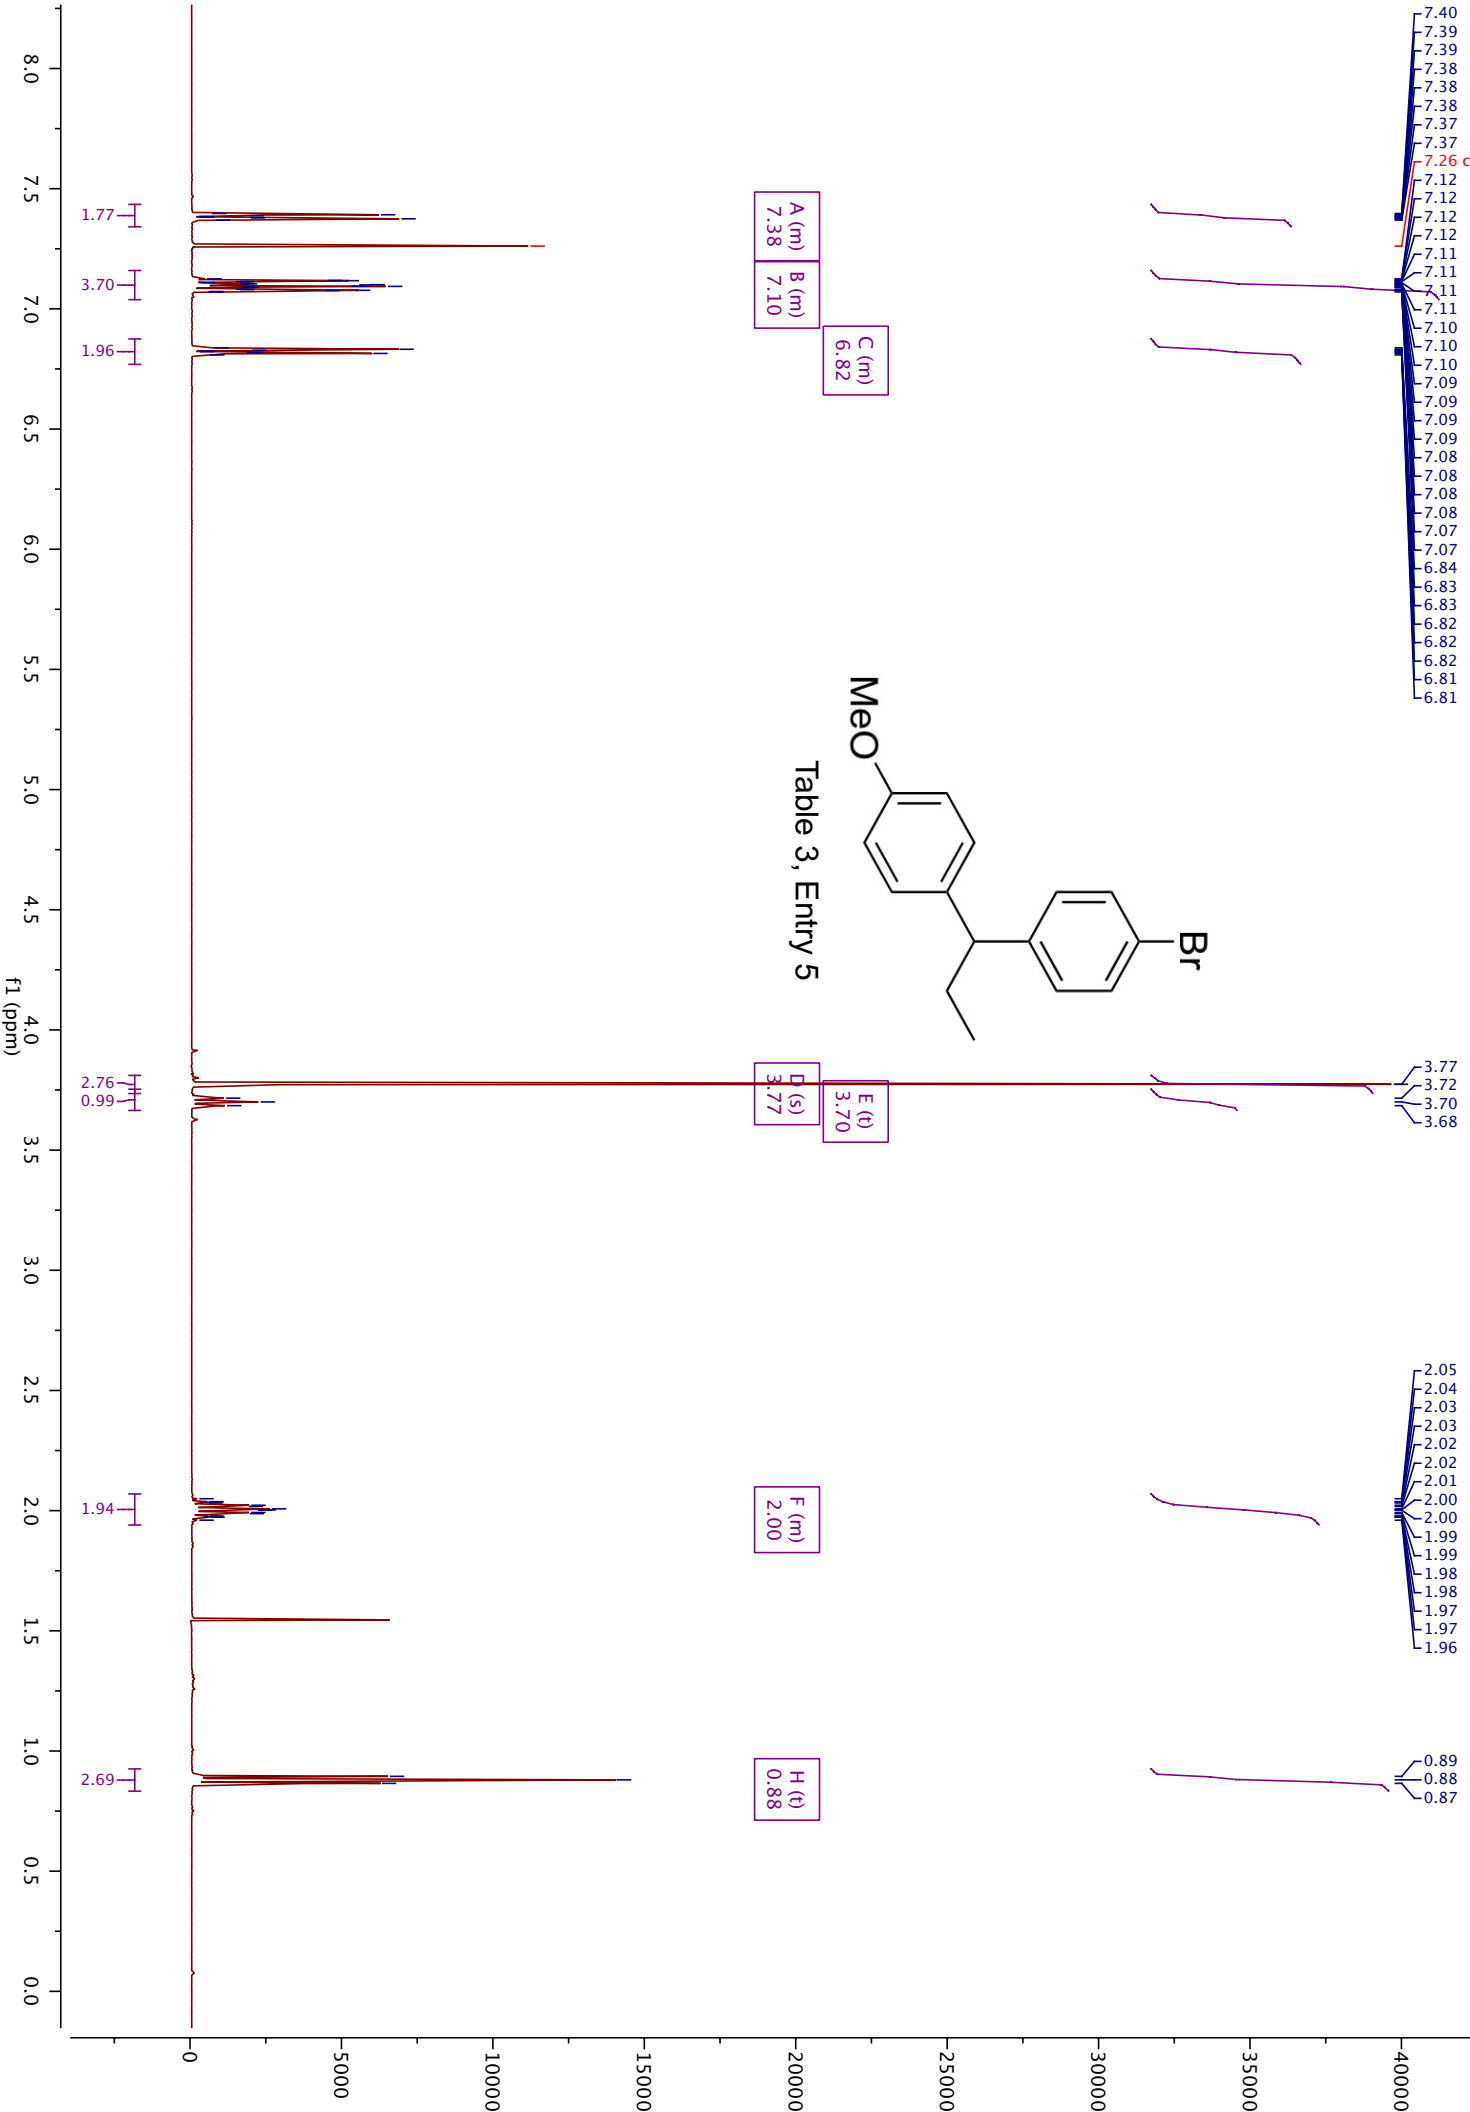

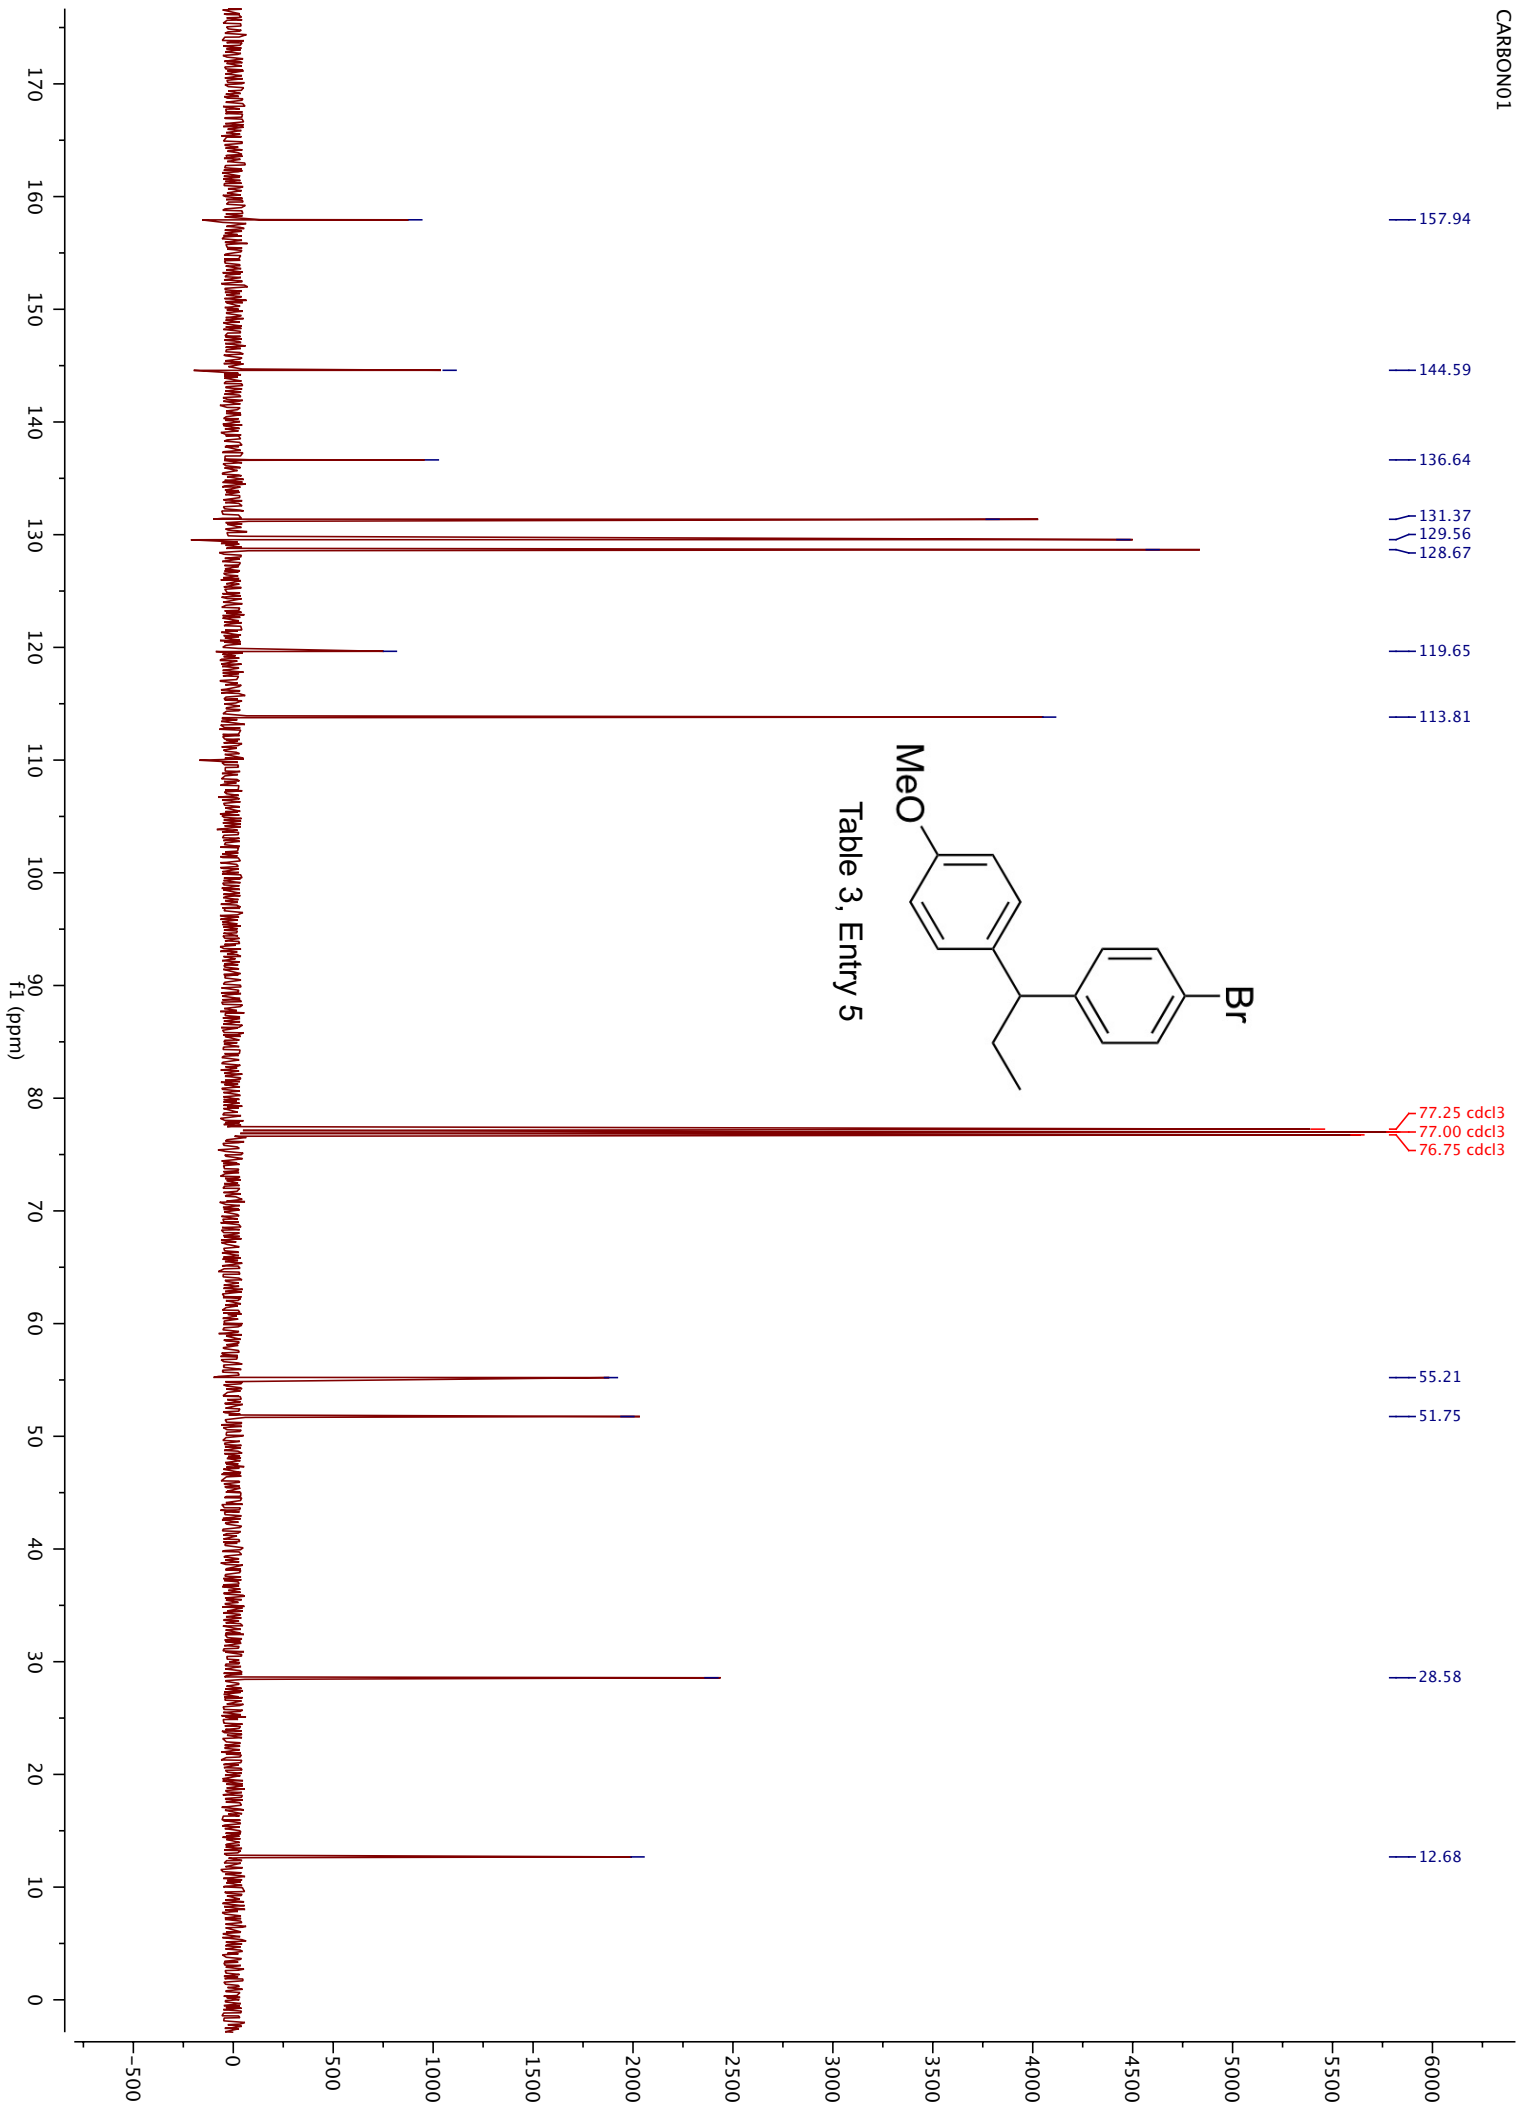

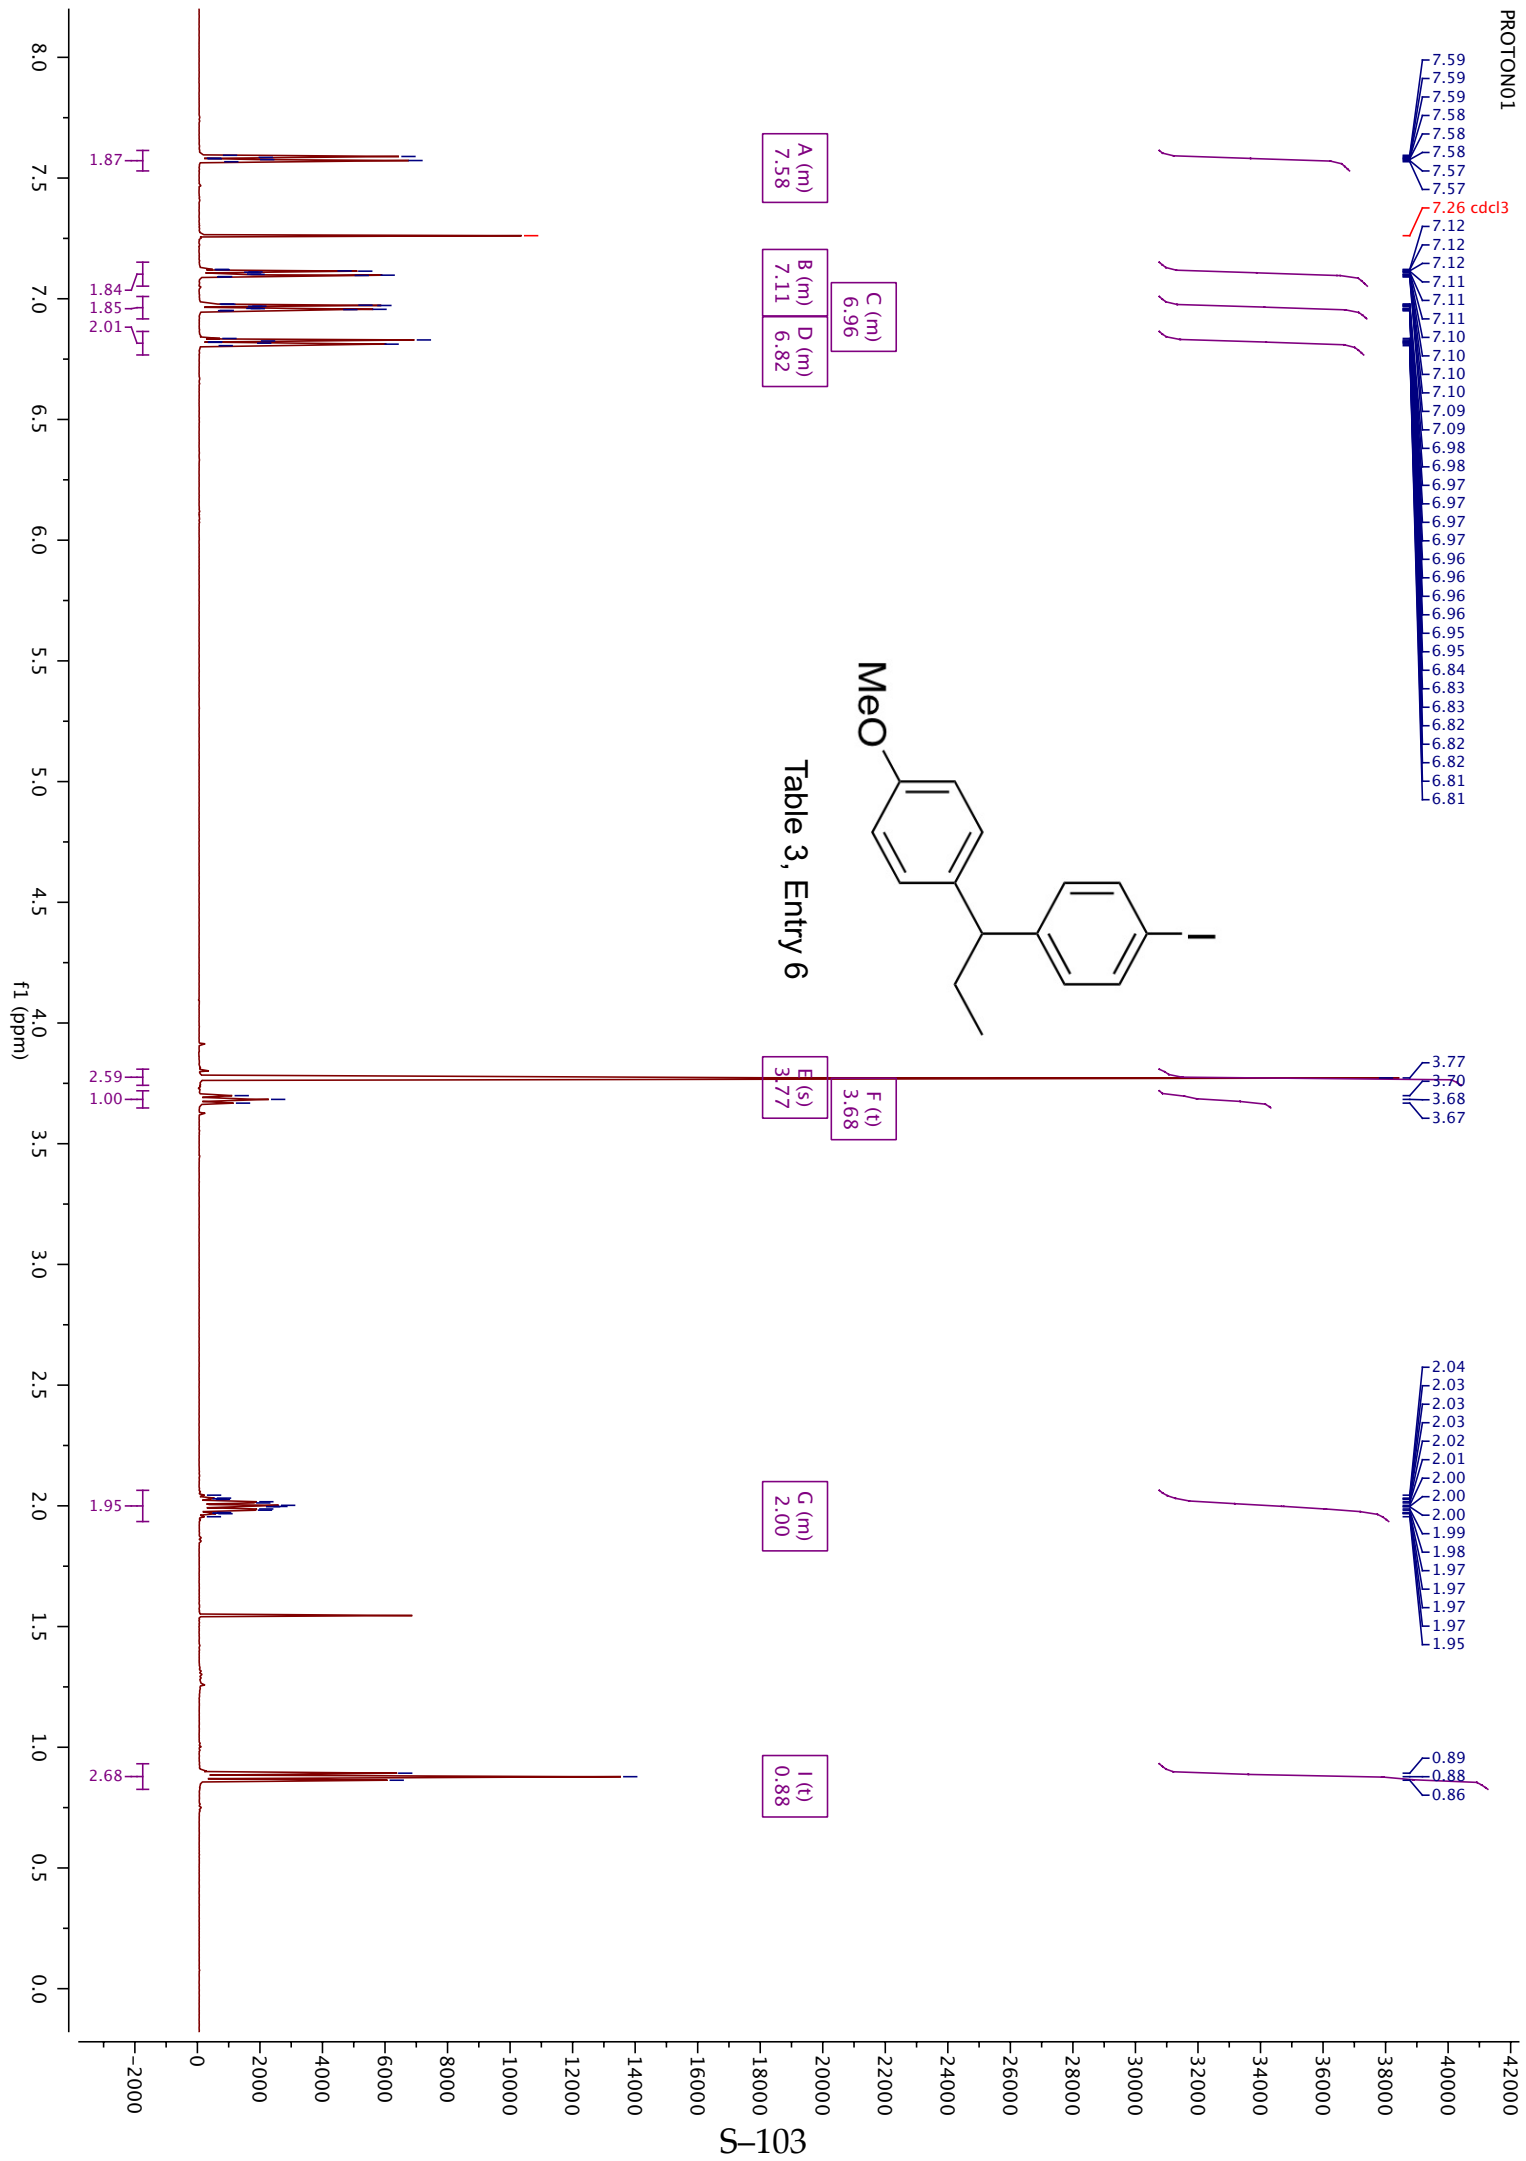

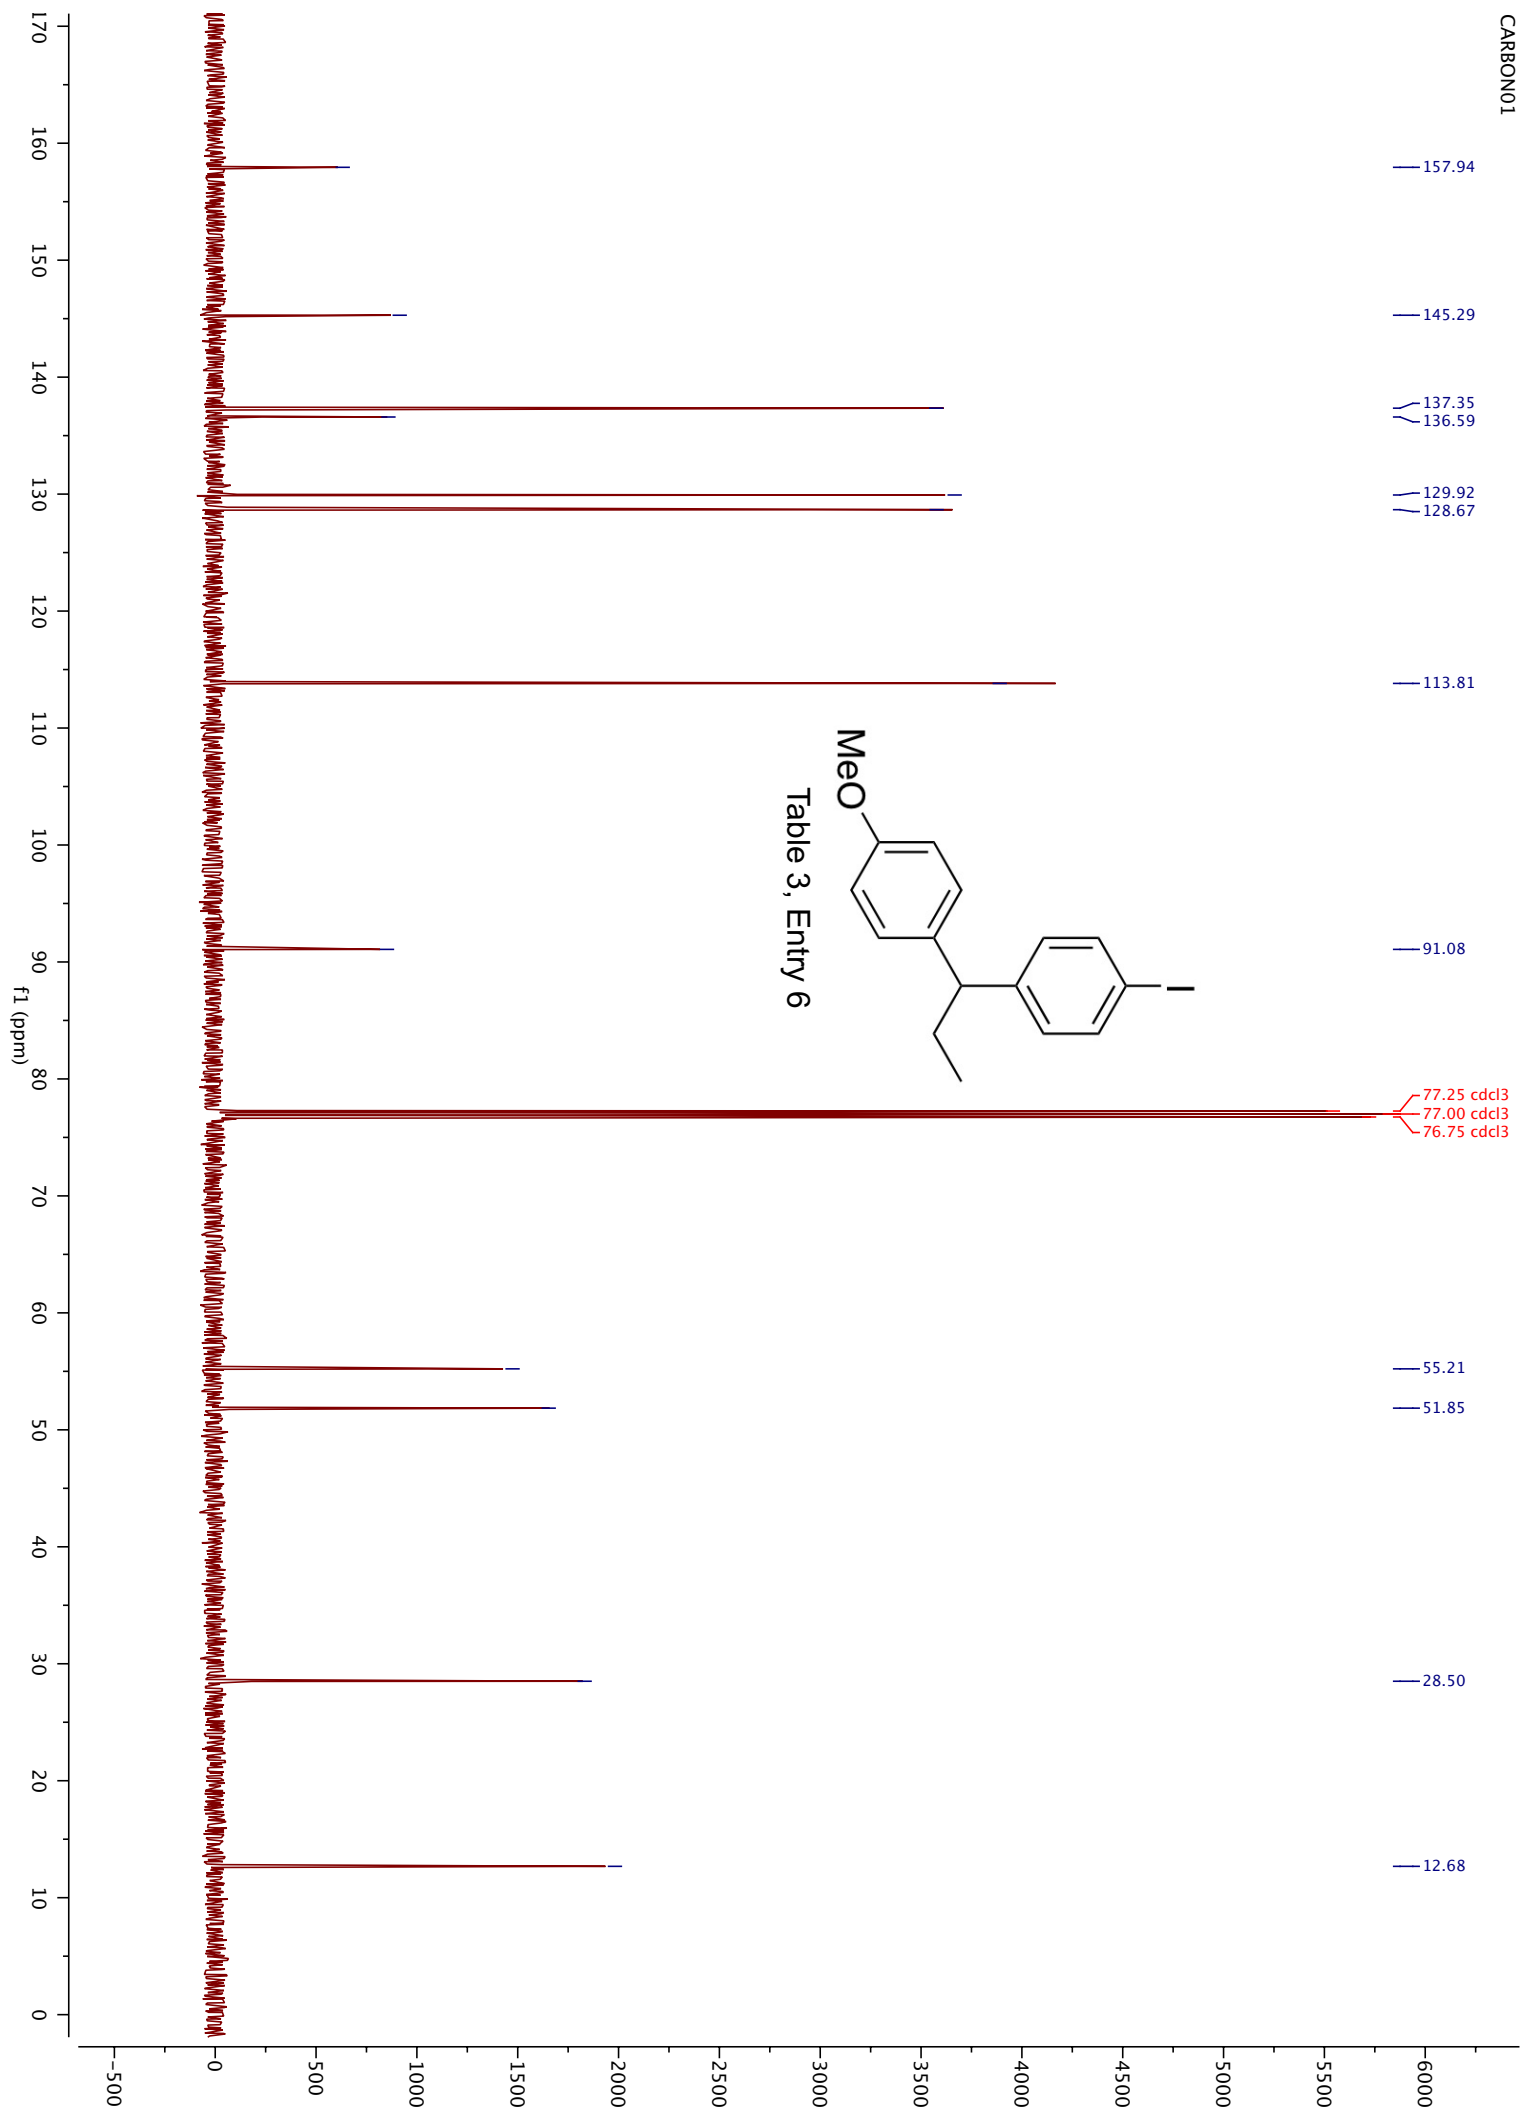



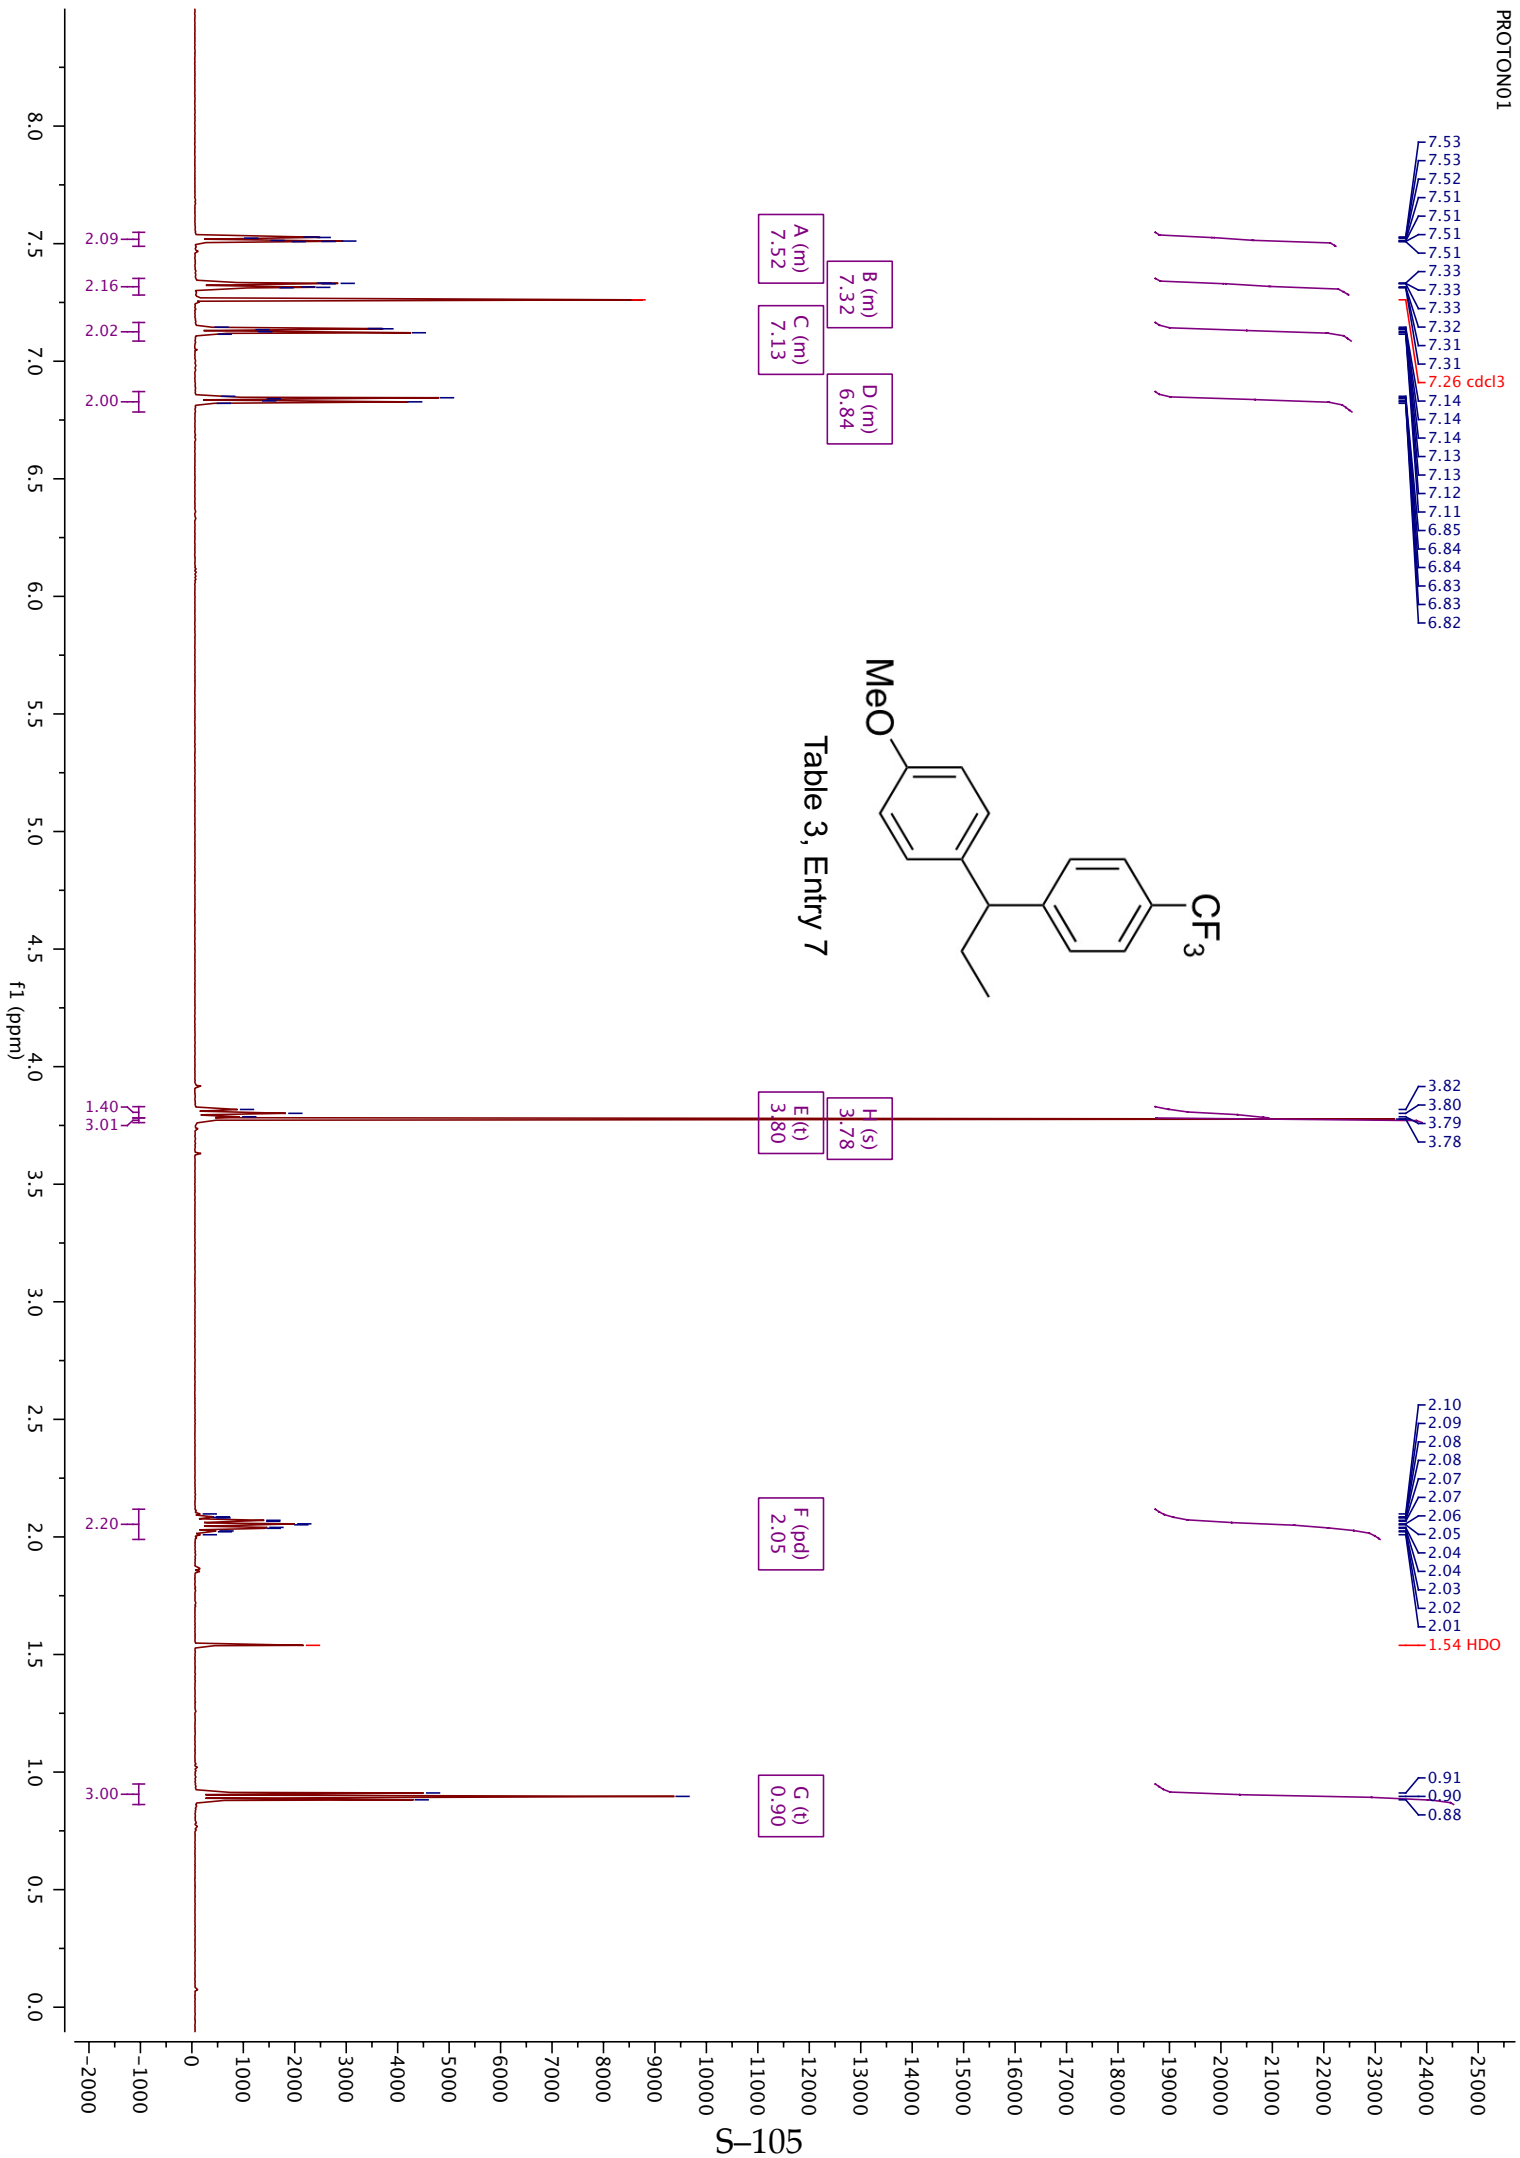

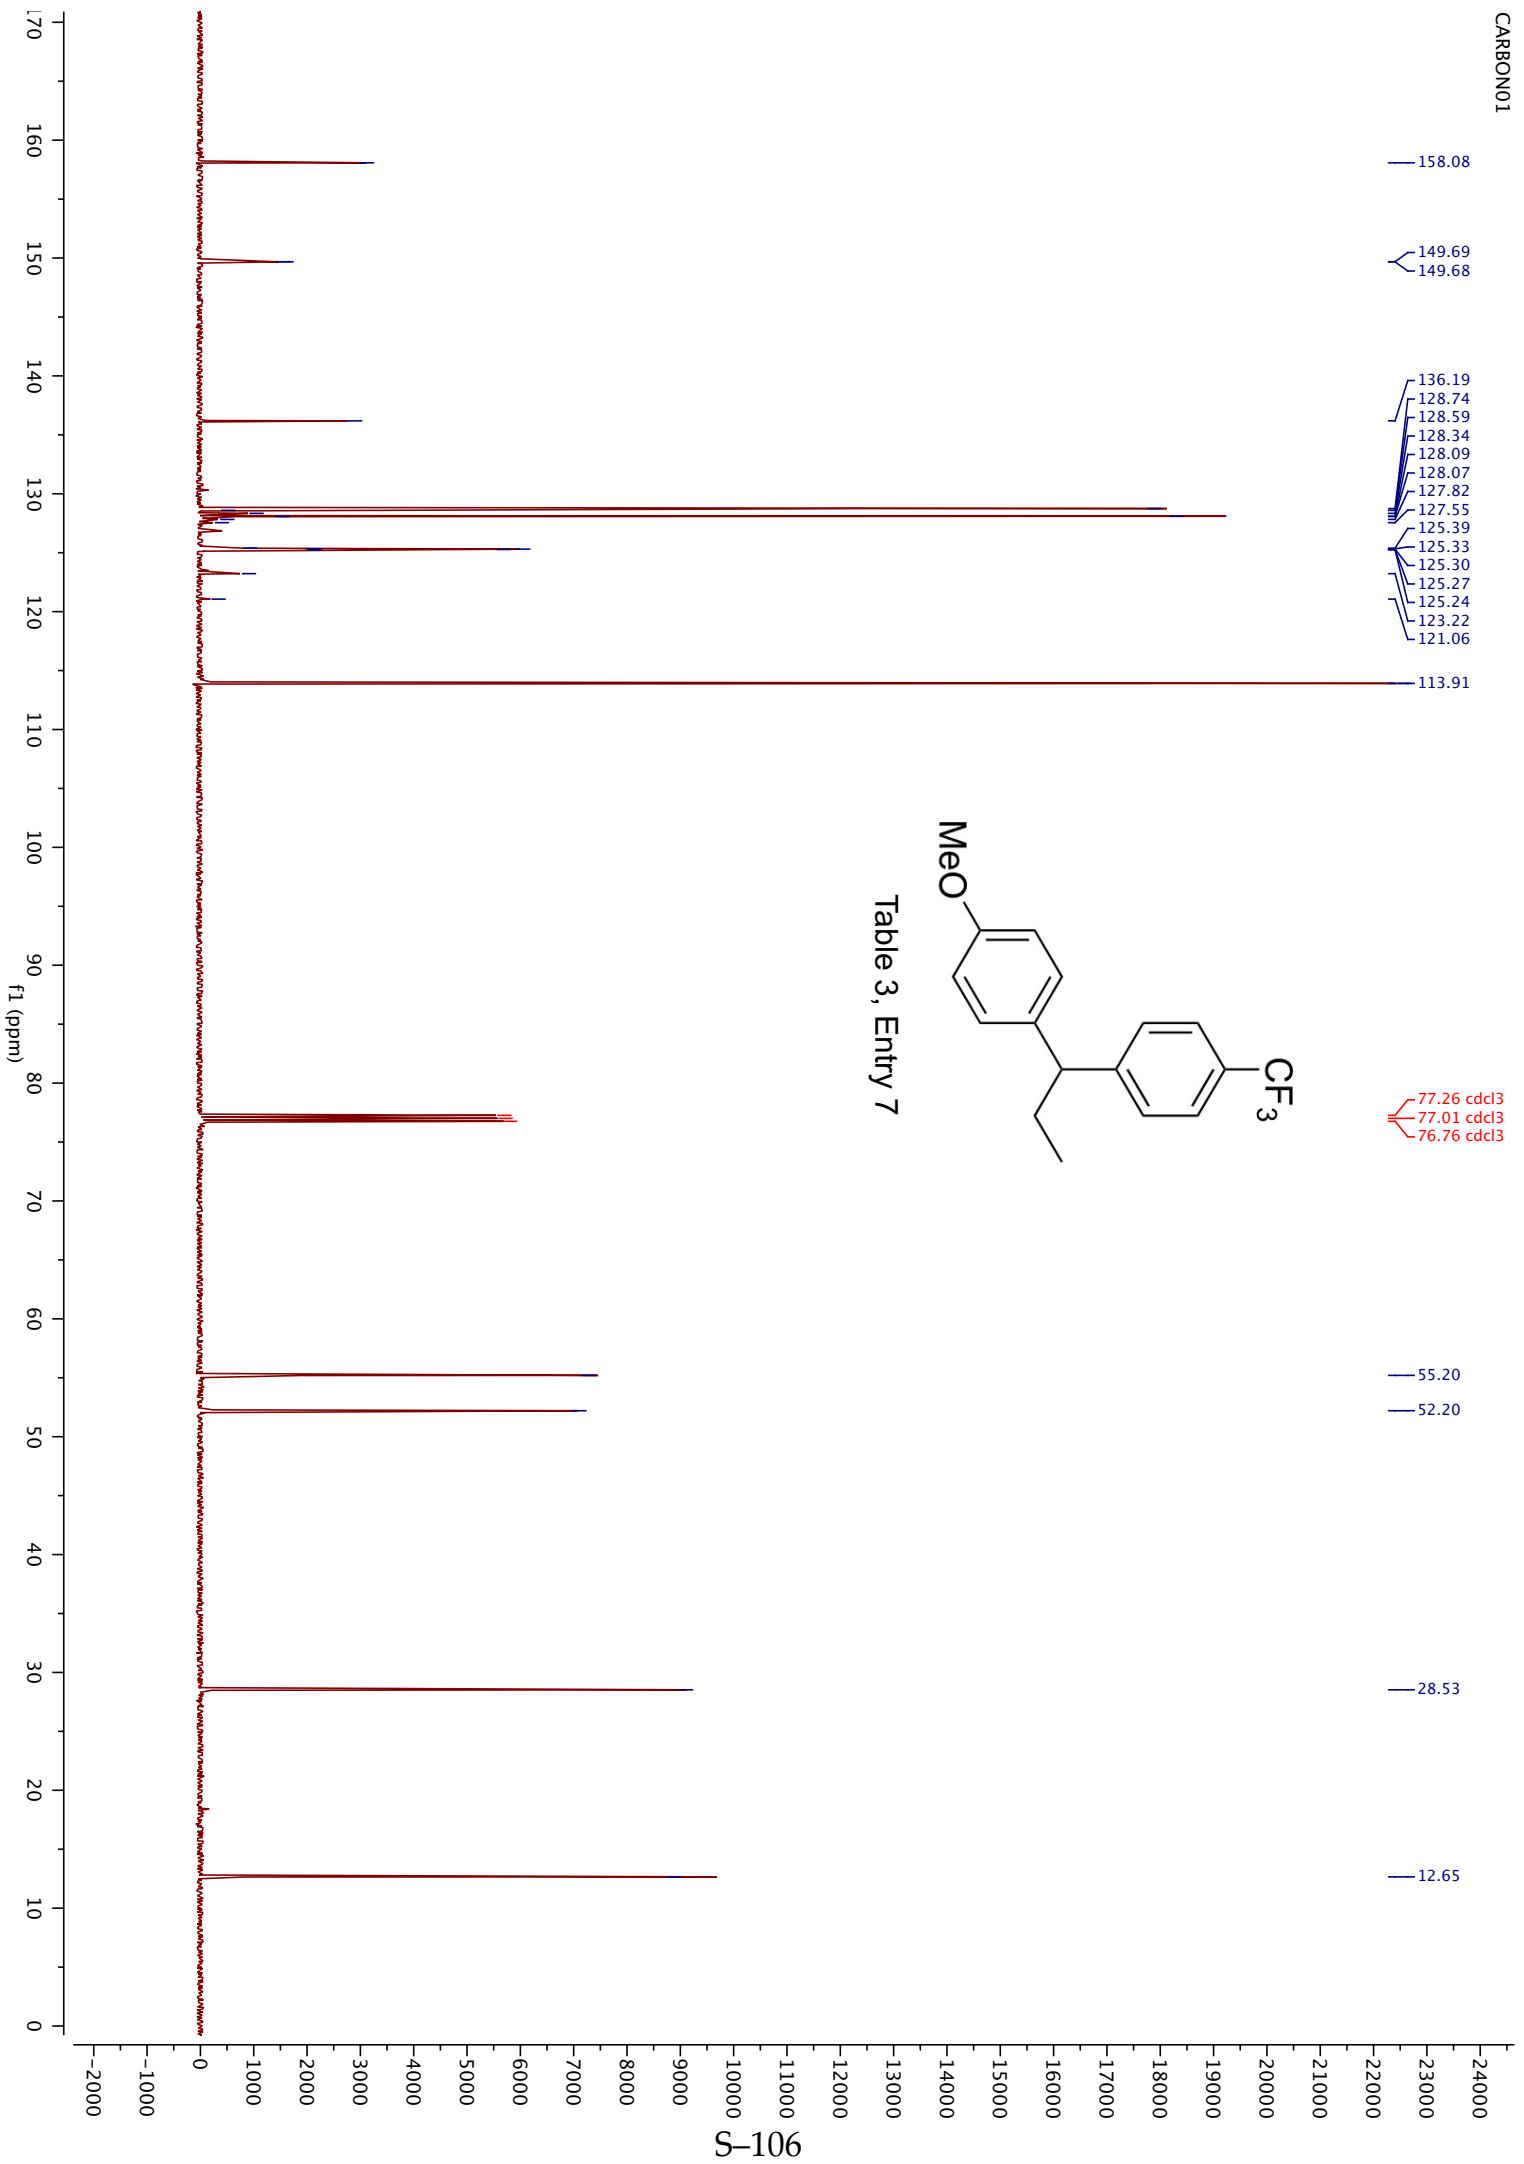

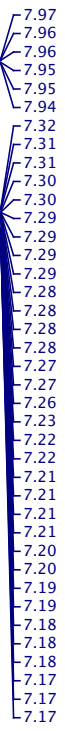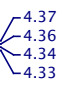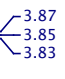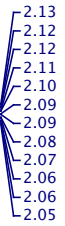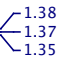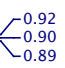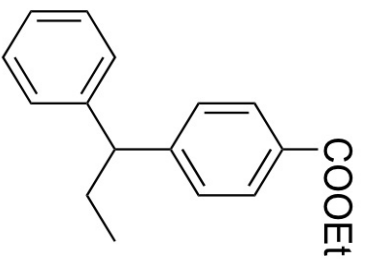

Table 3, Entry 8

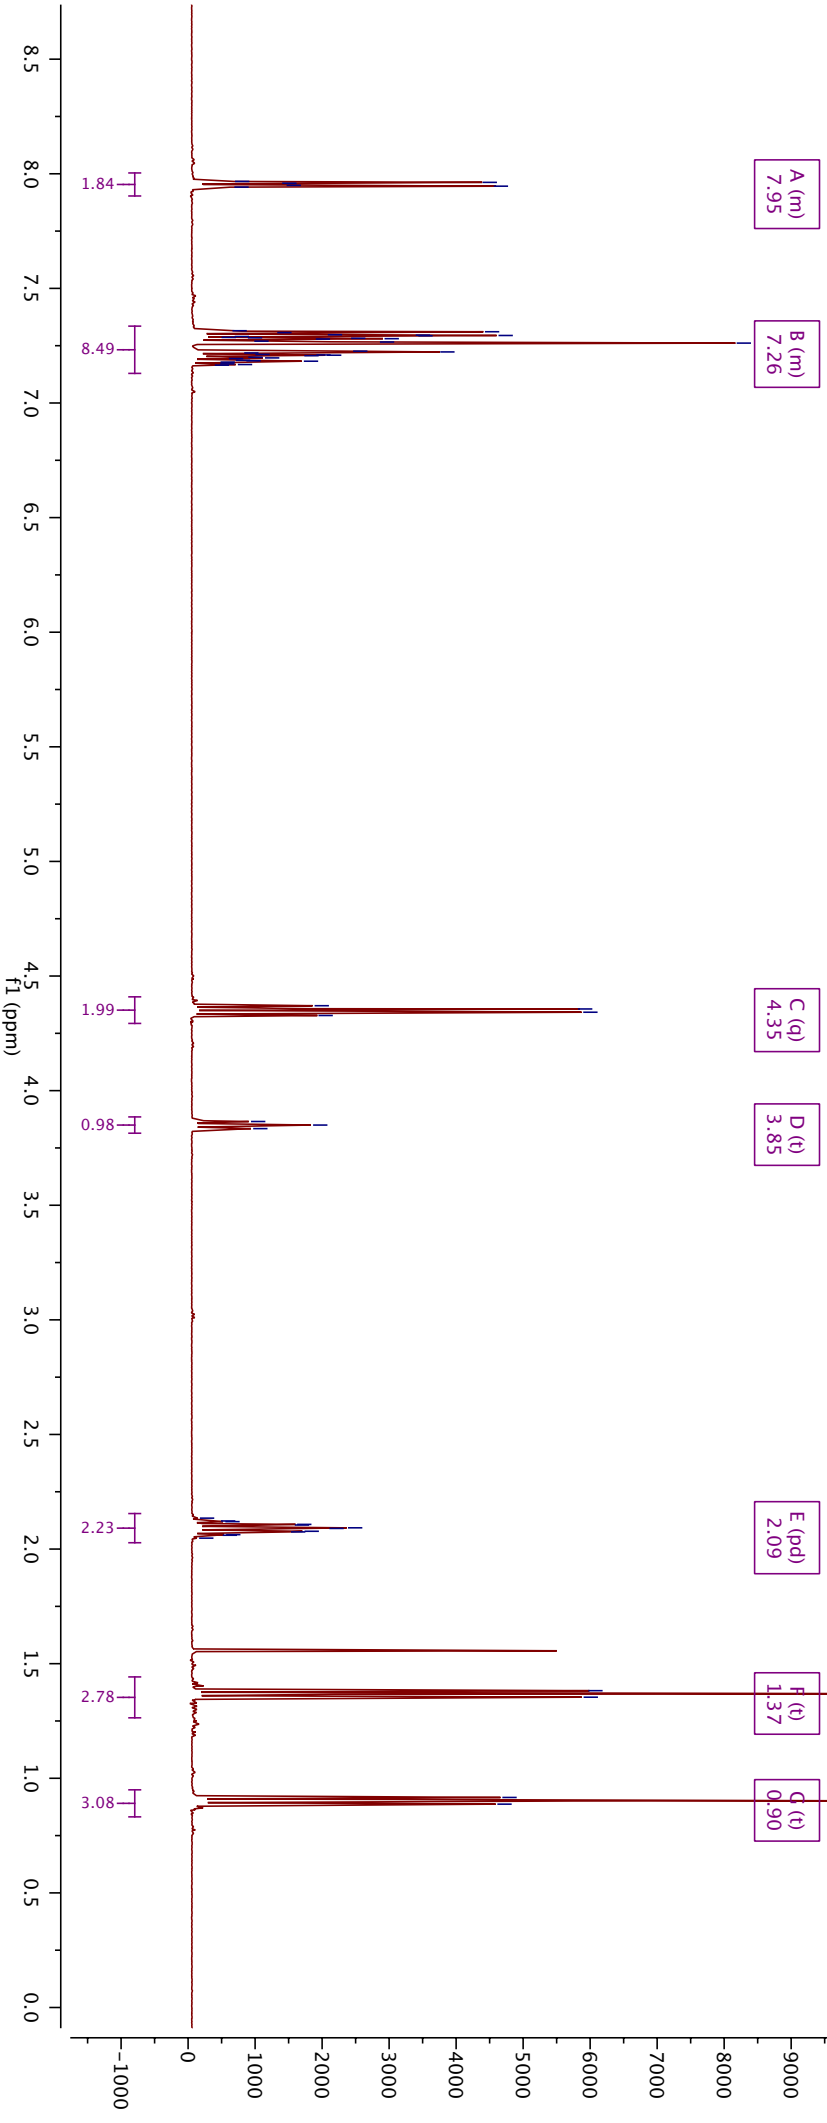

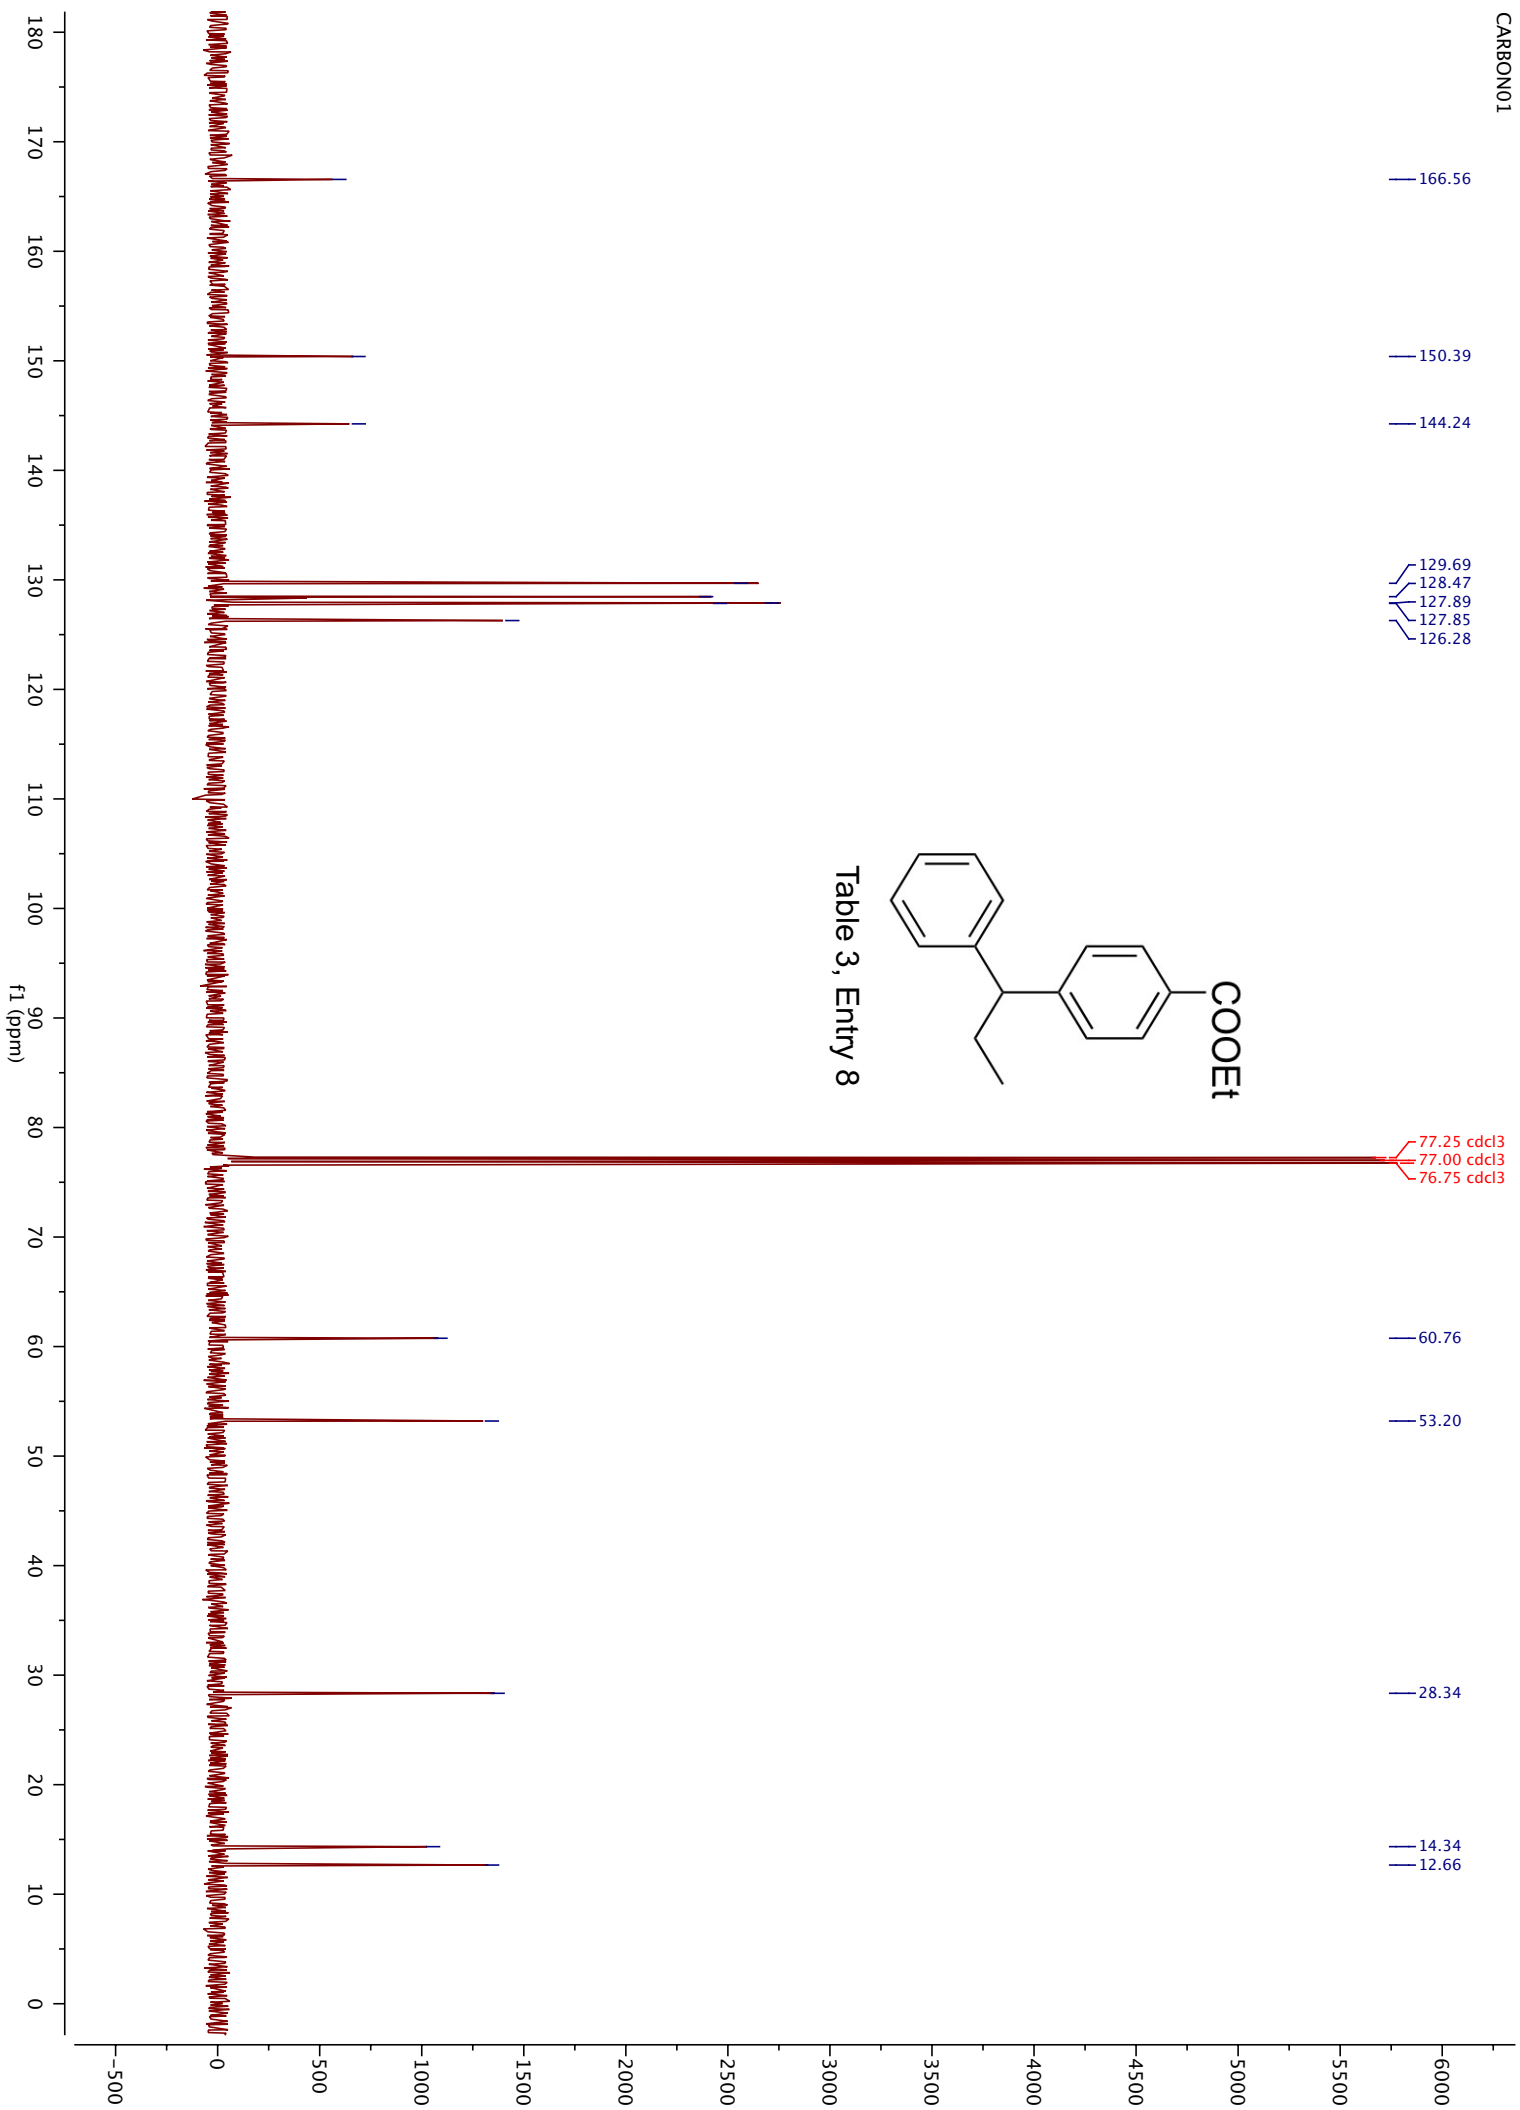

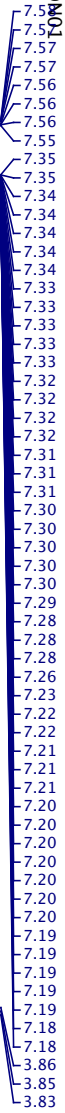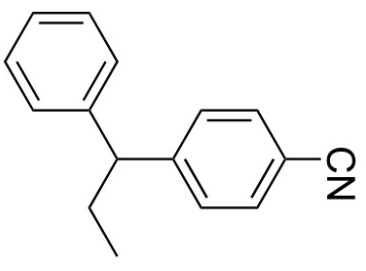

Table 3, Entry 9

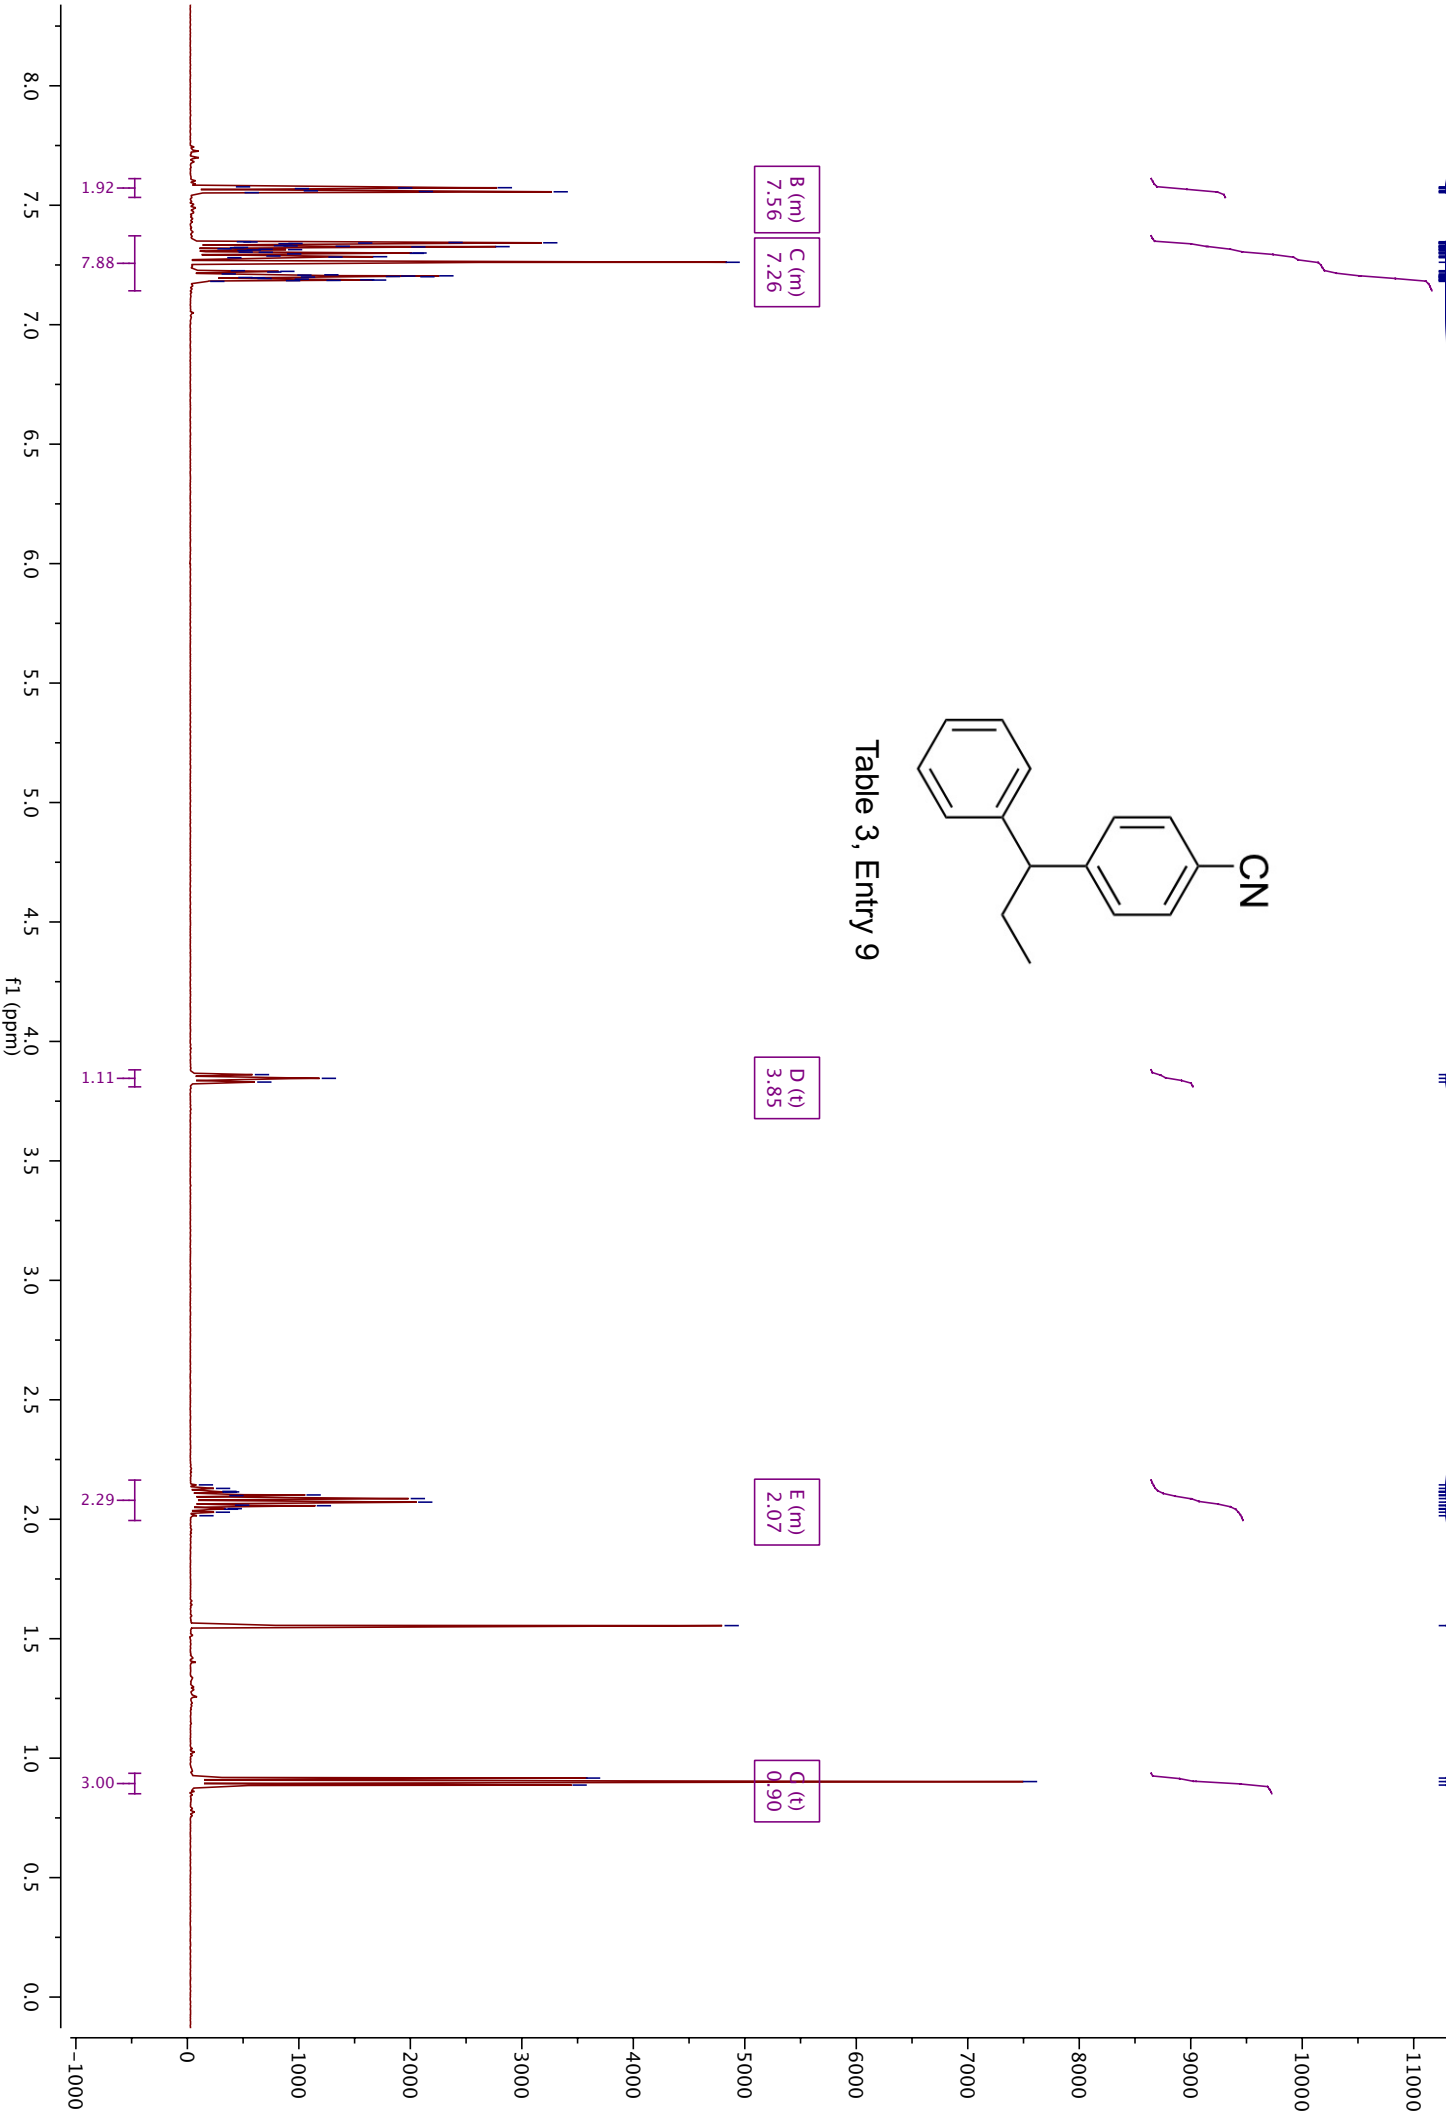

B (m)  
7.56

C (m)  
7.26

D (t)  
3.85

E (m)  
2.07

F (t)  
0.90

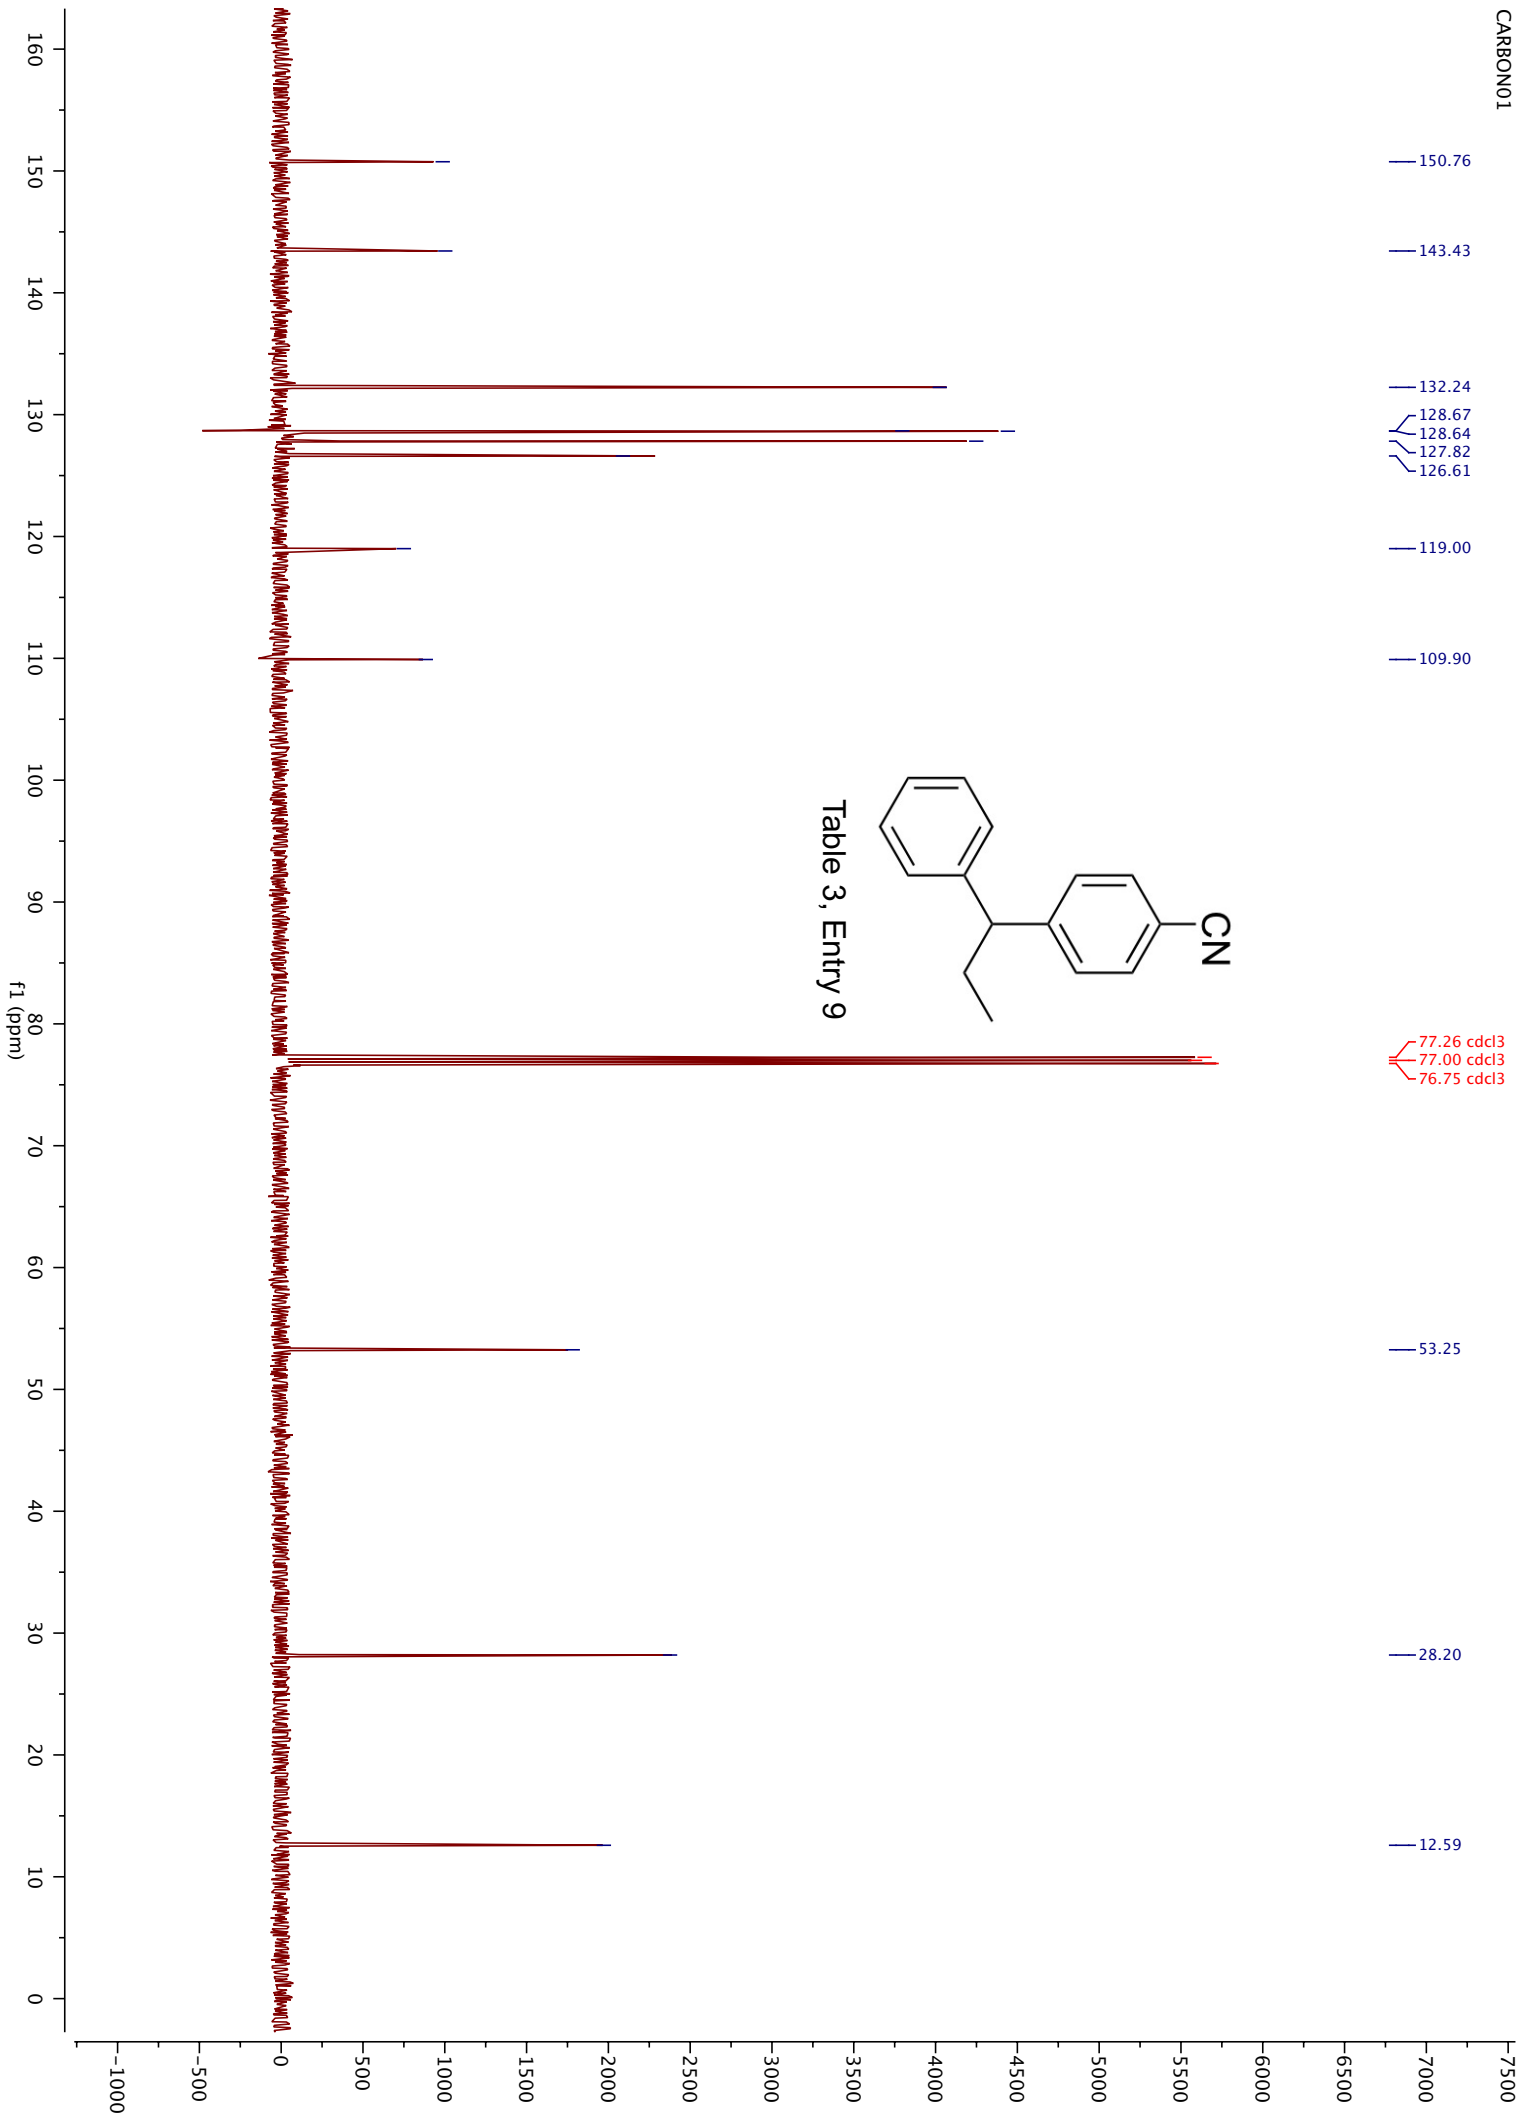

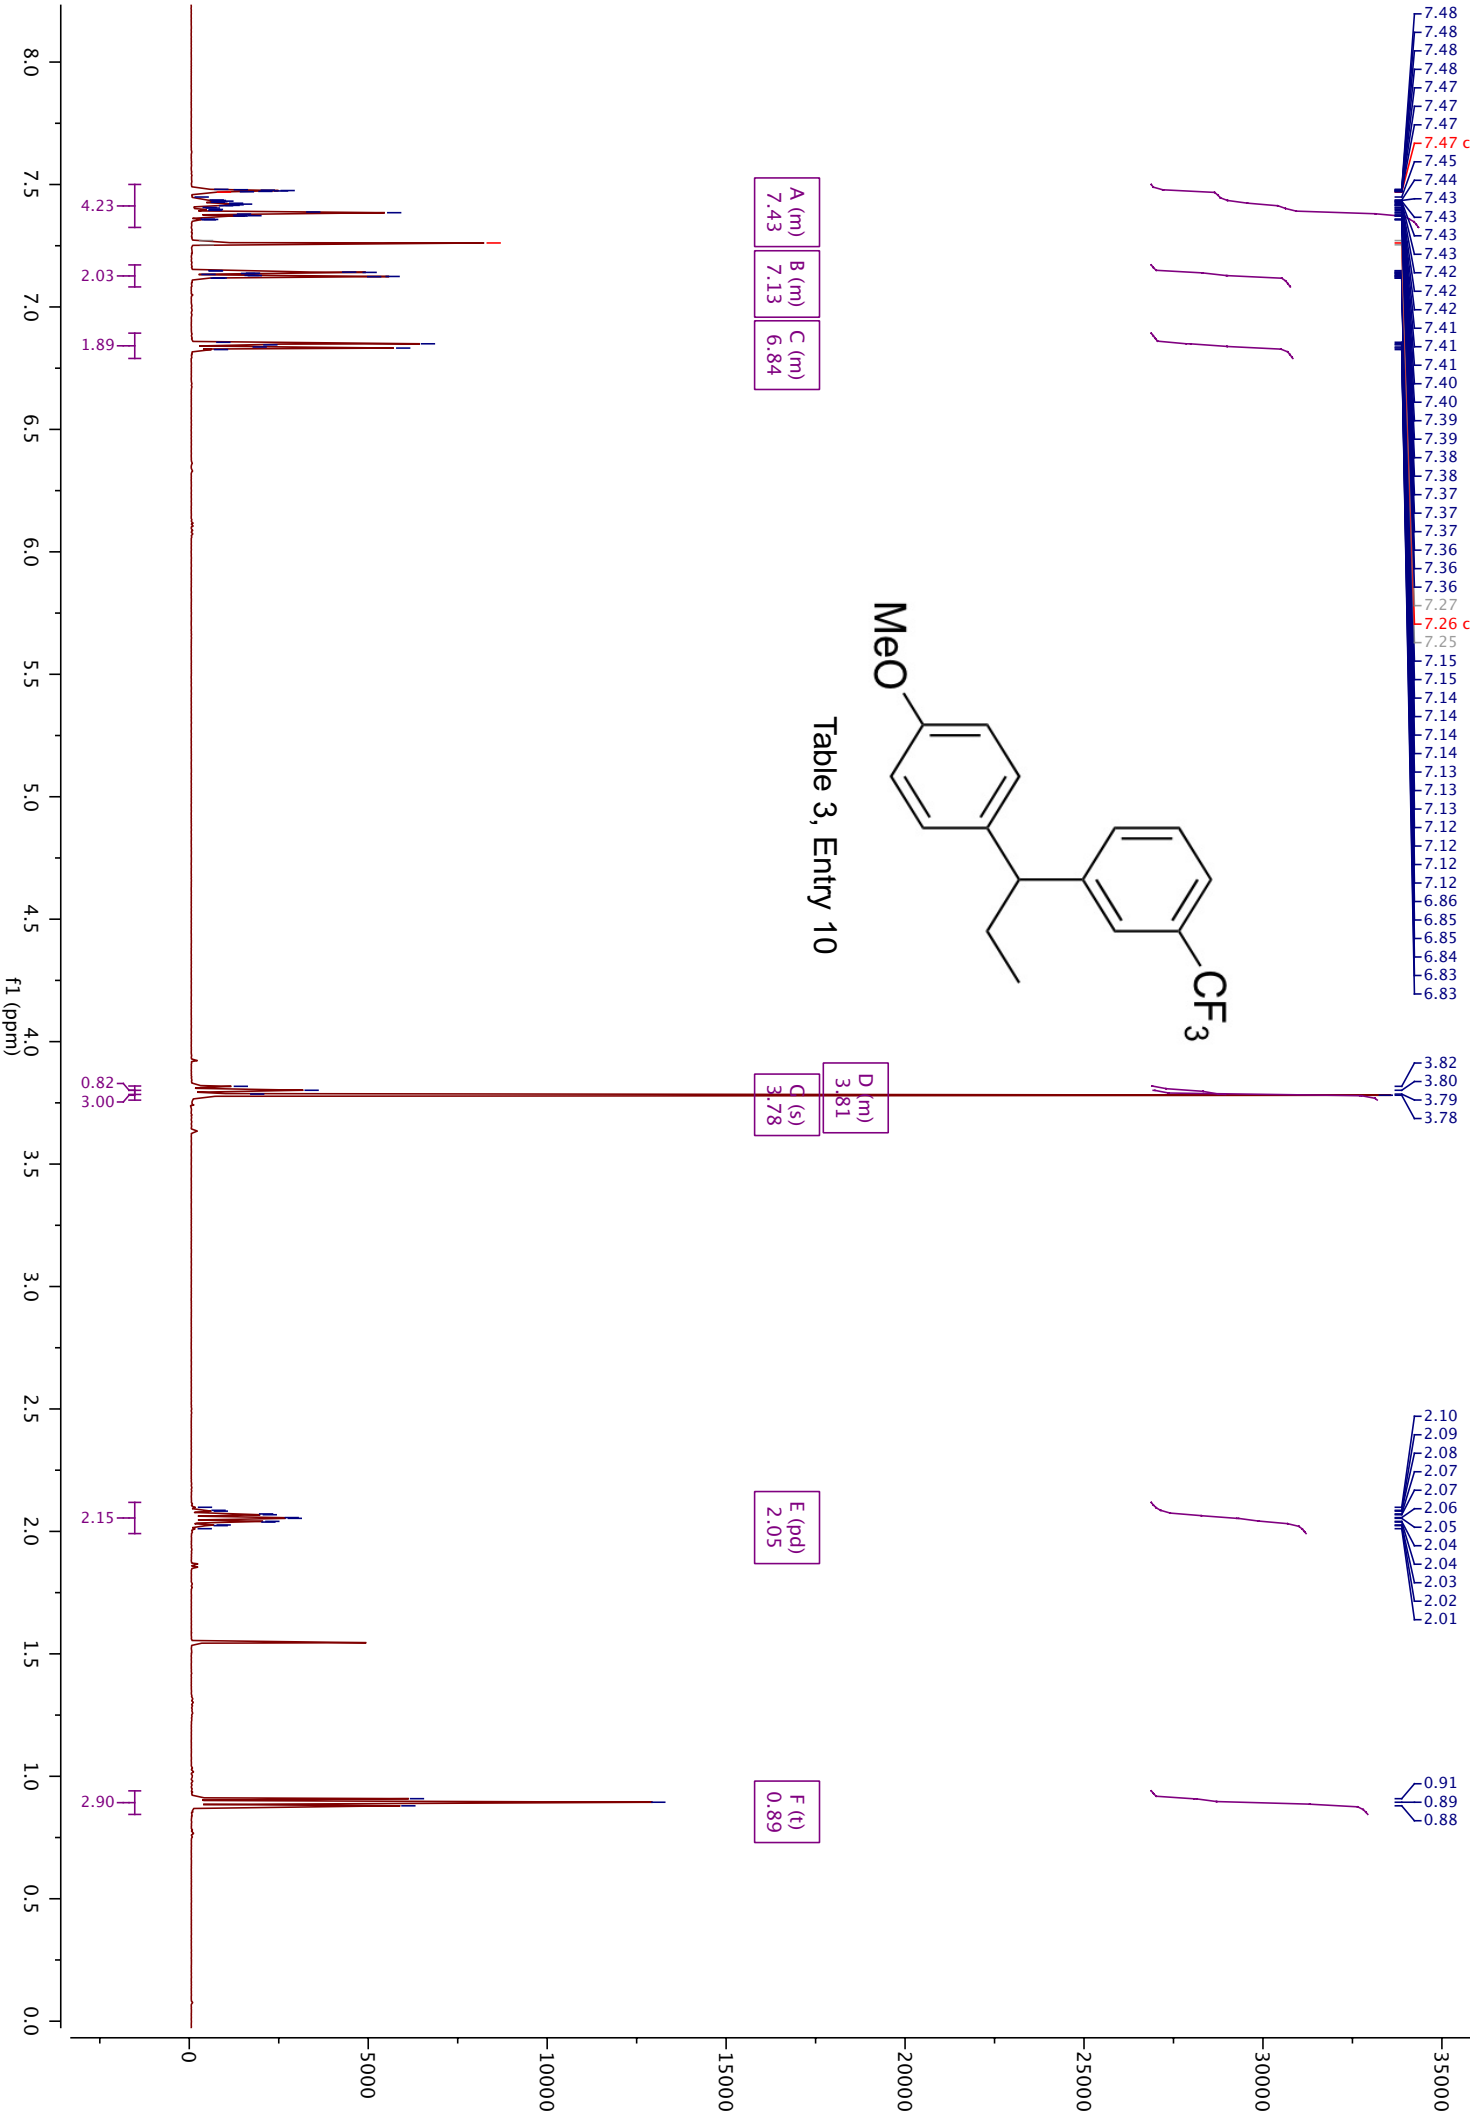

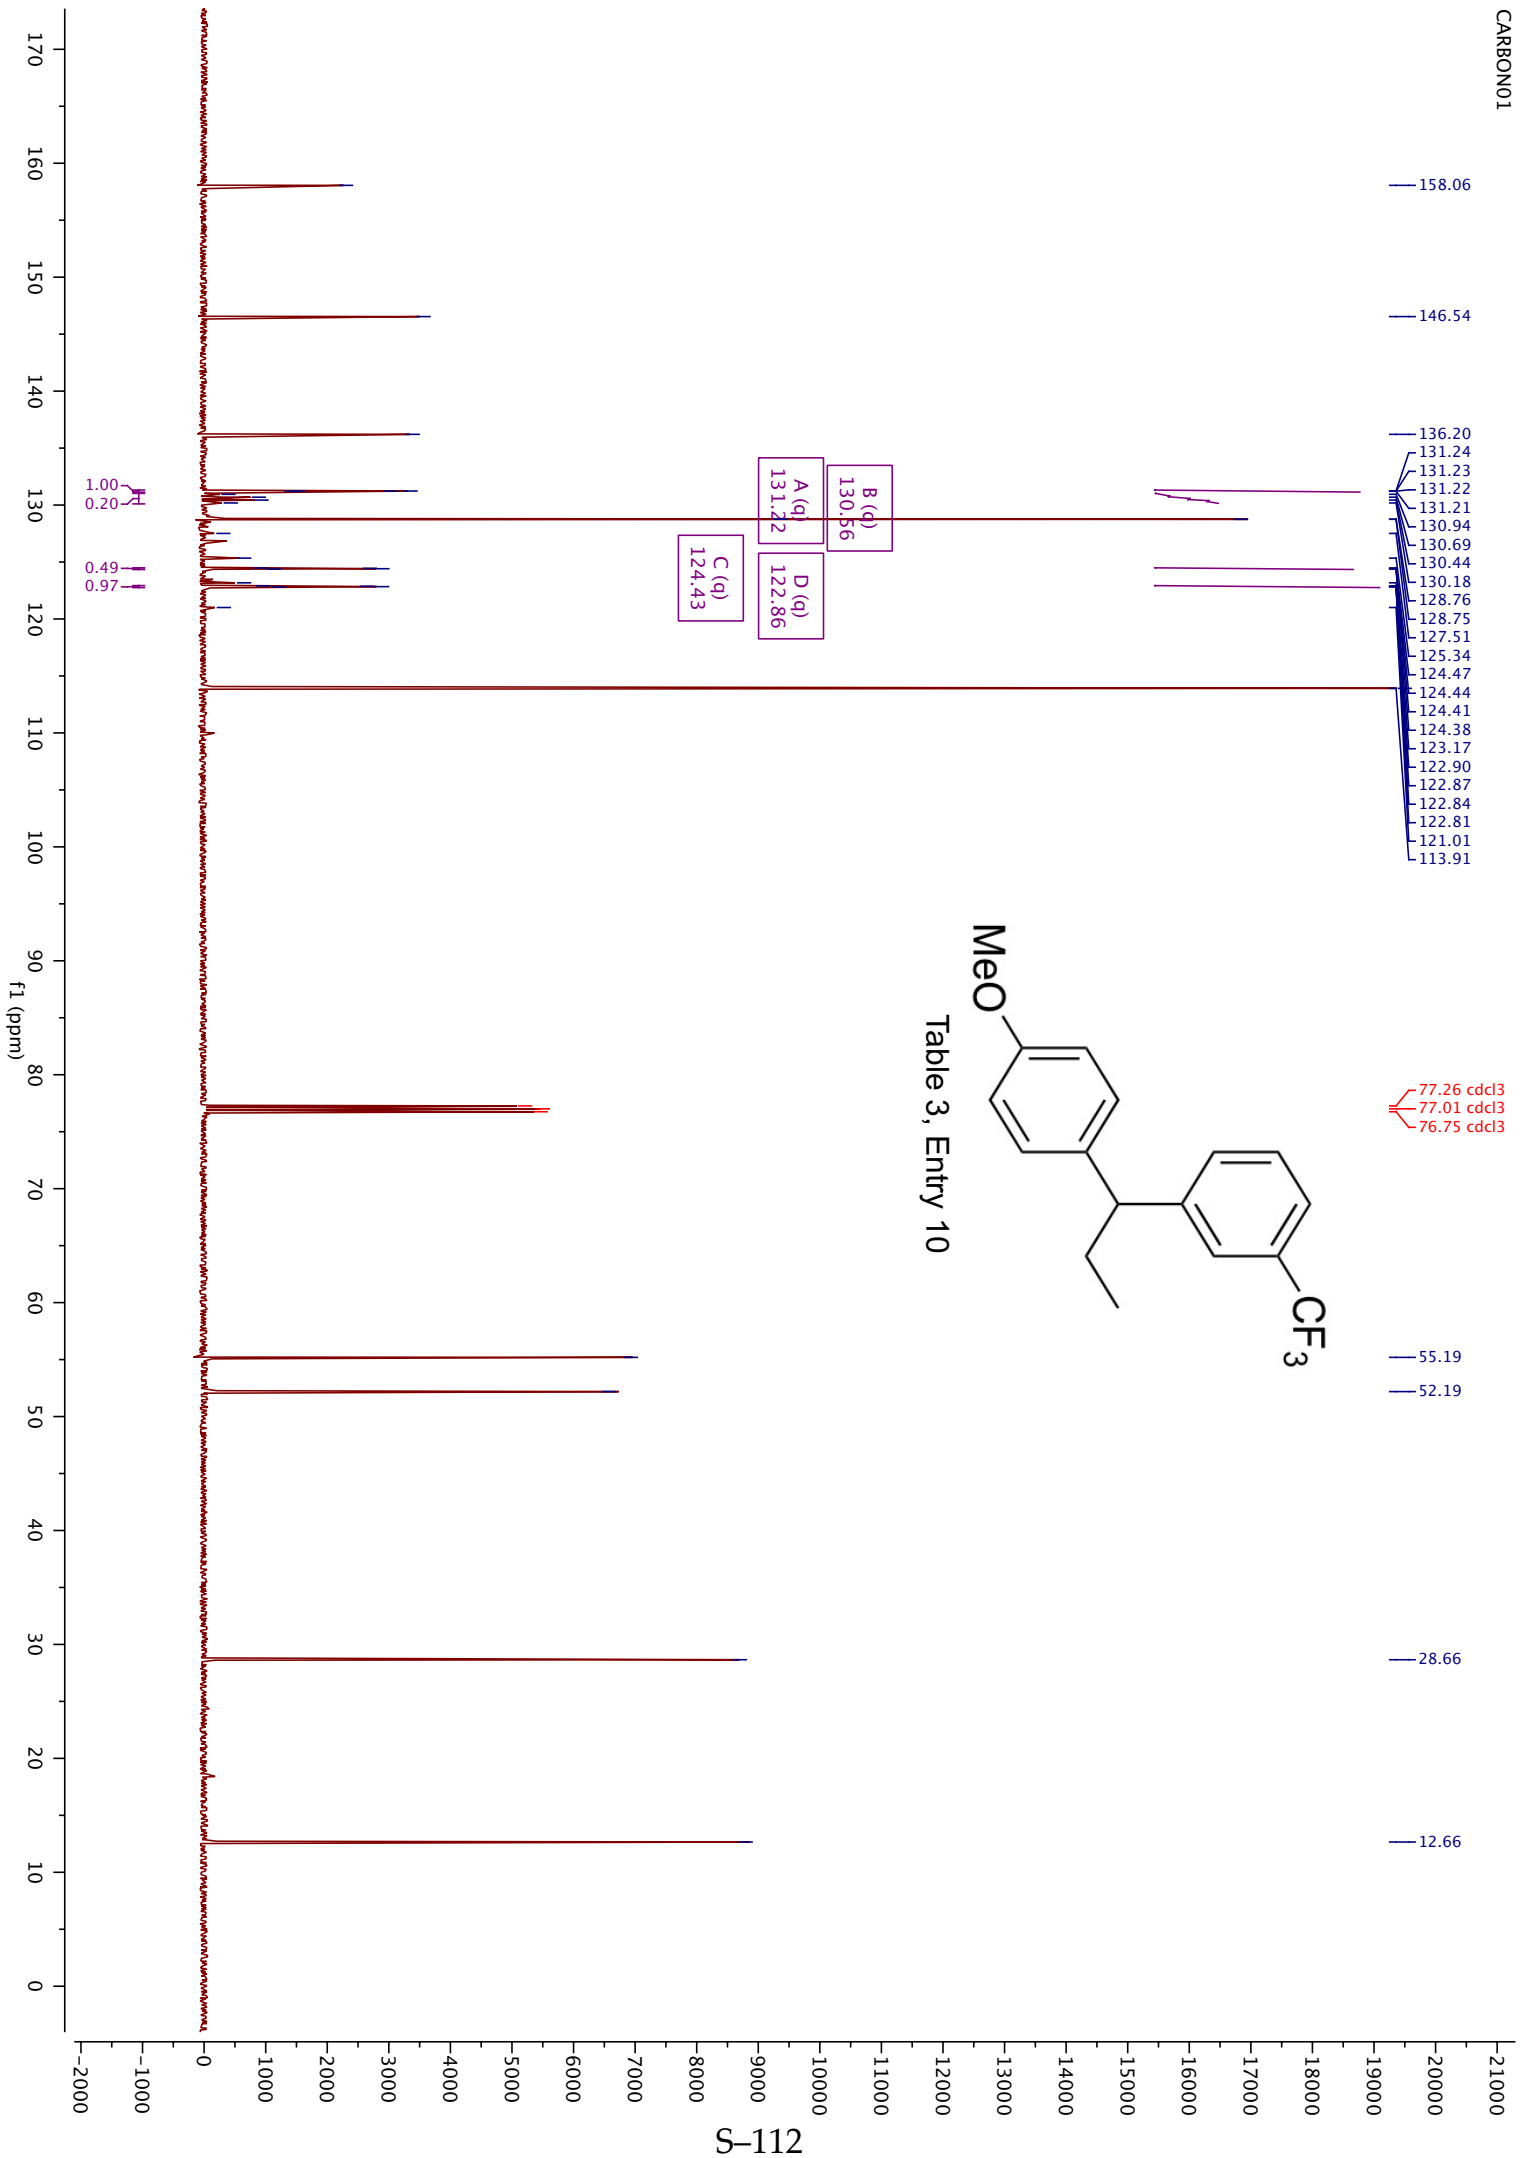



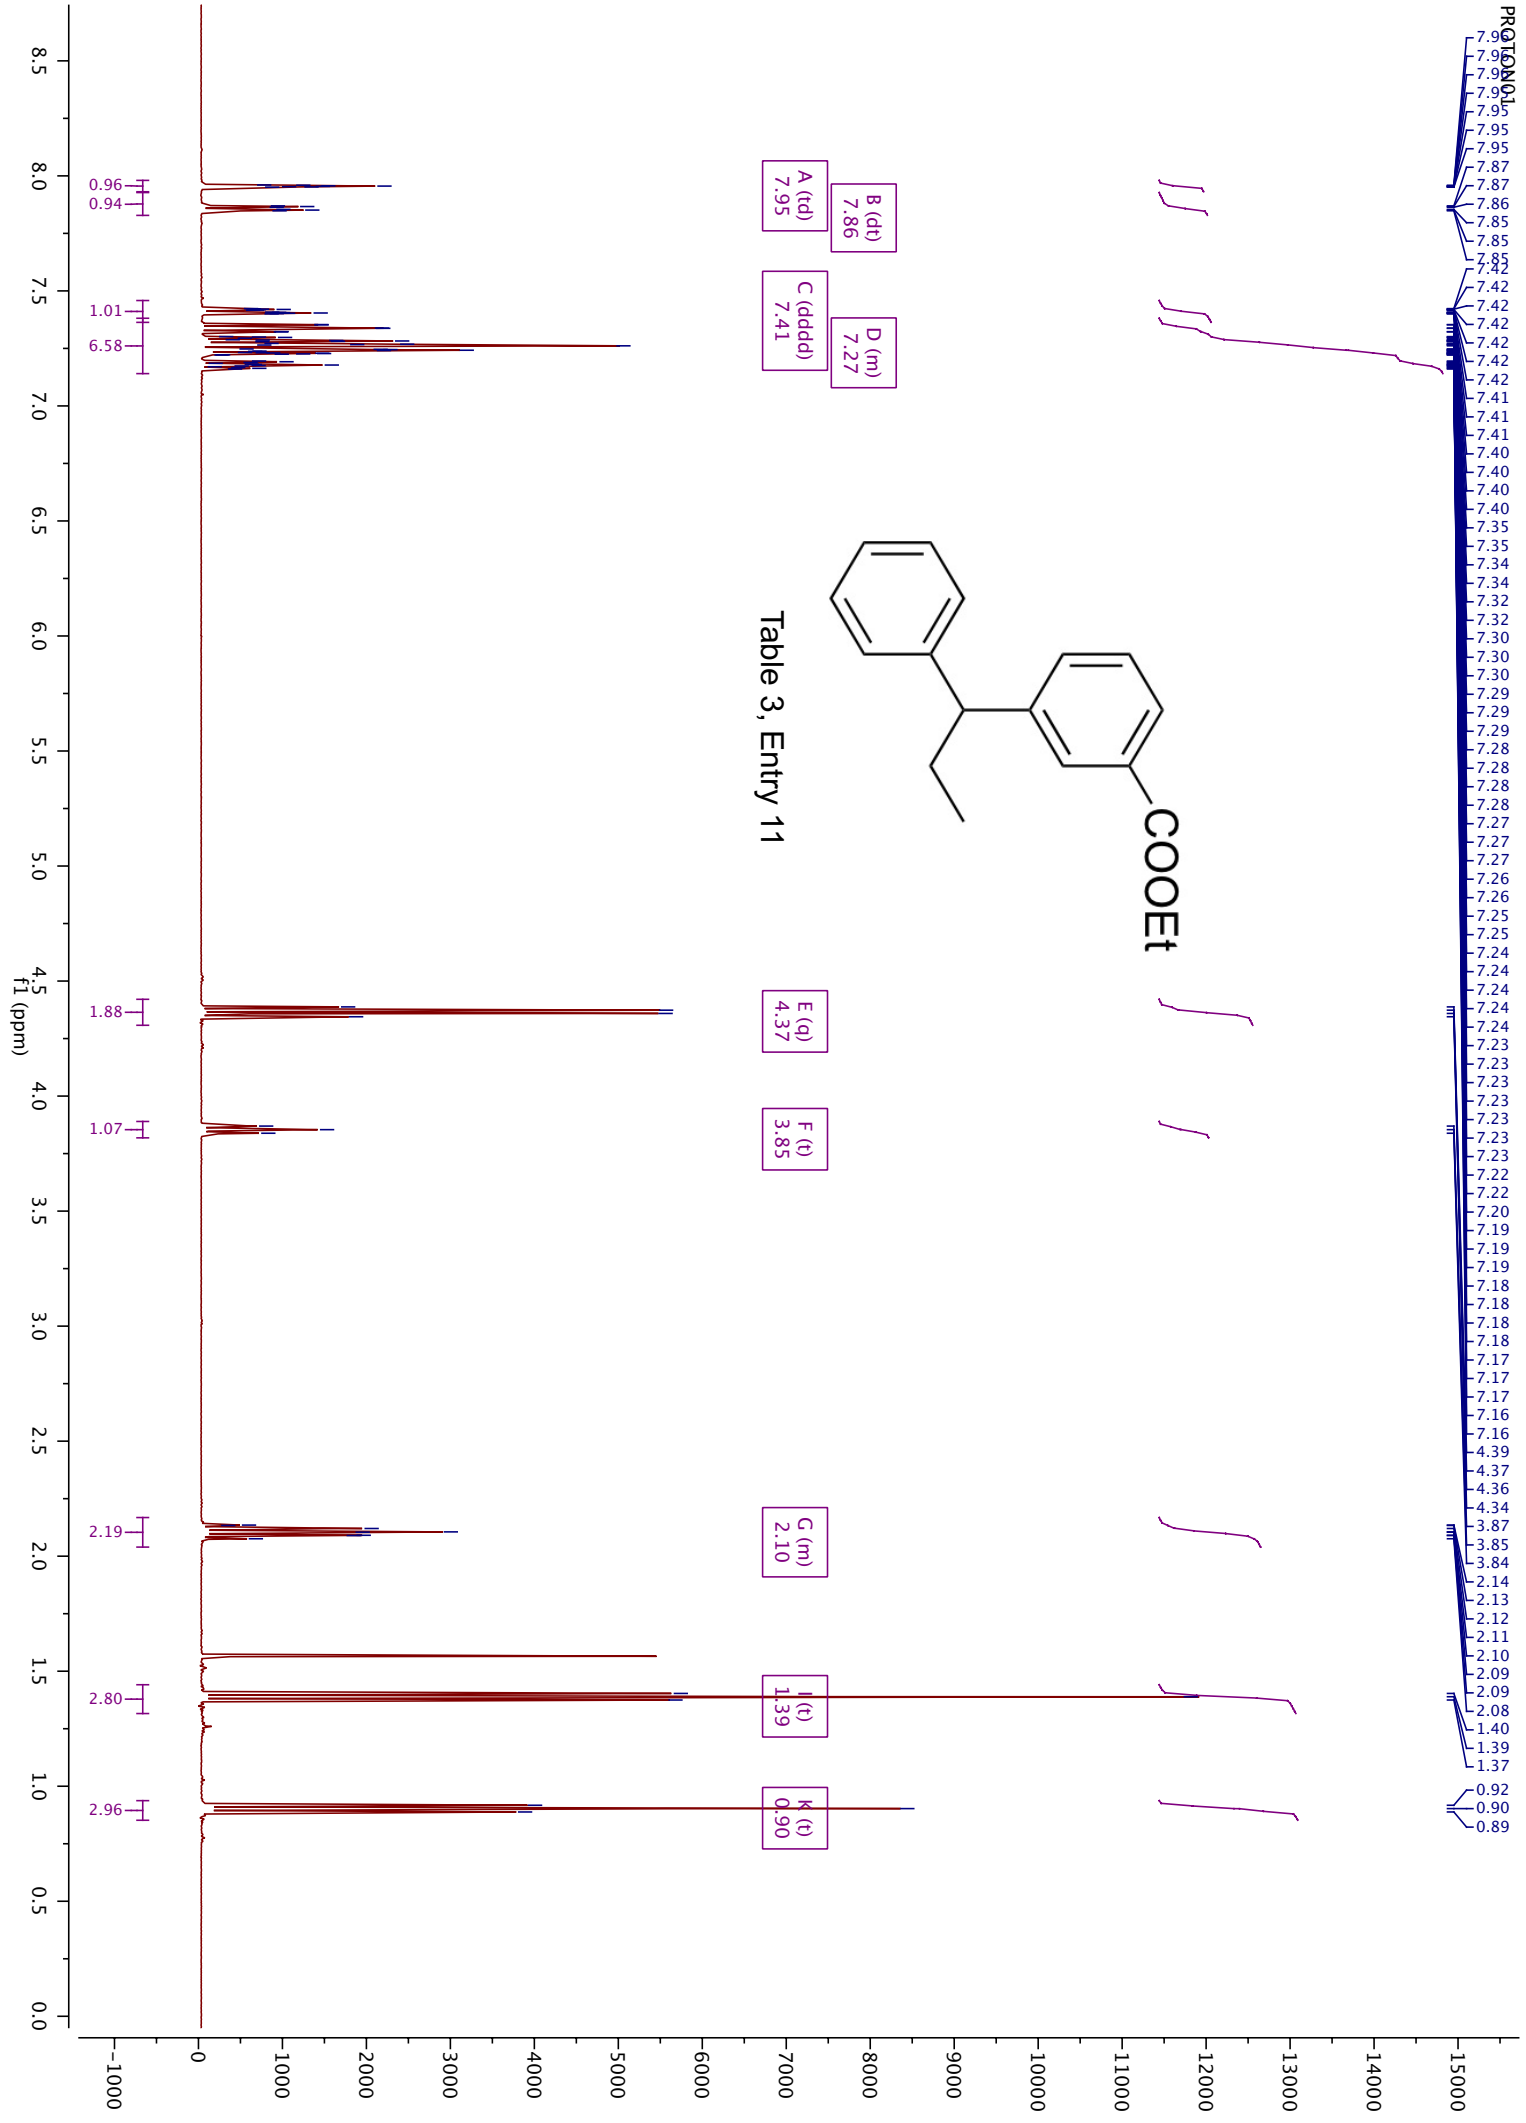

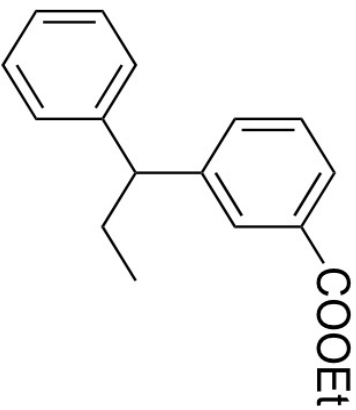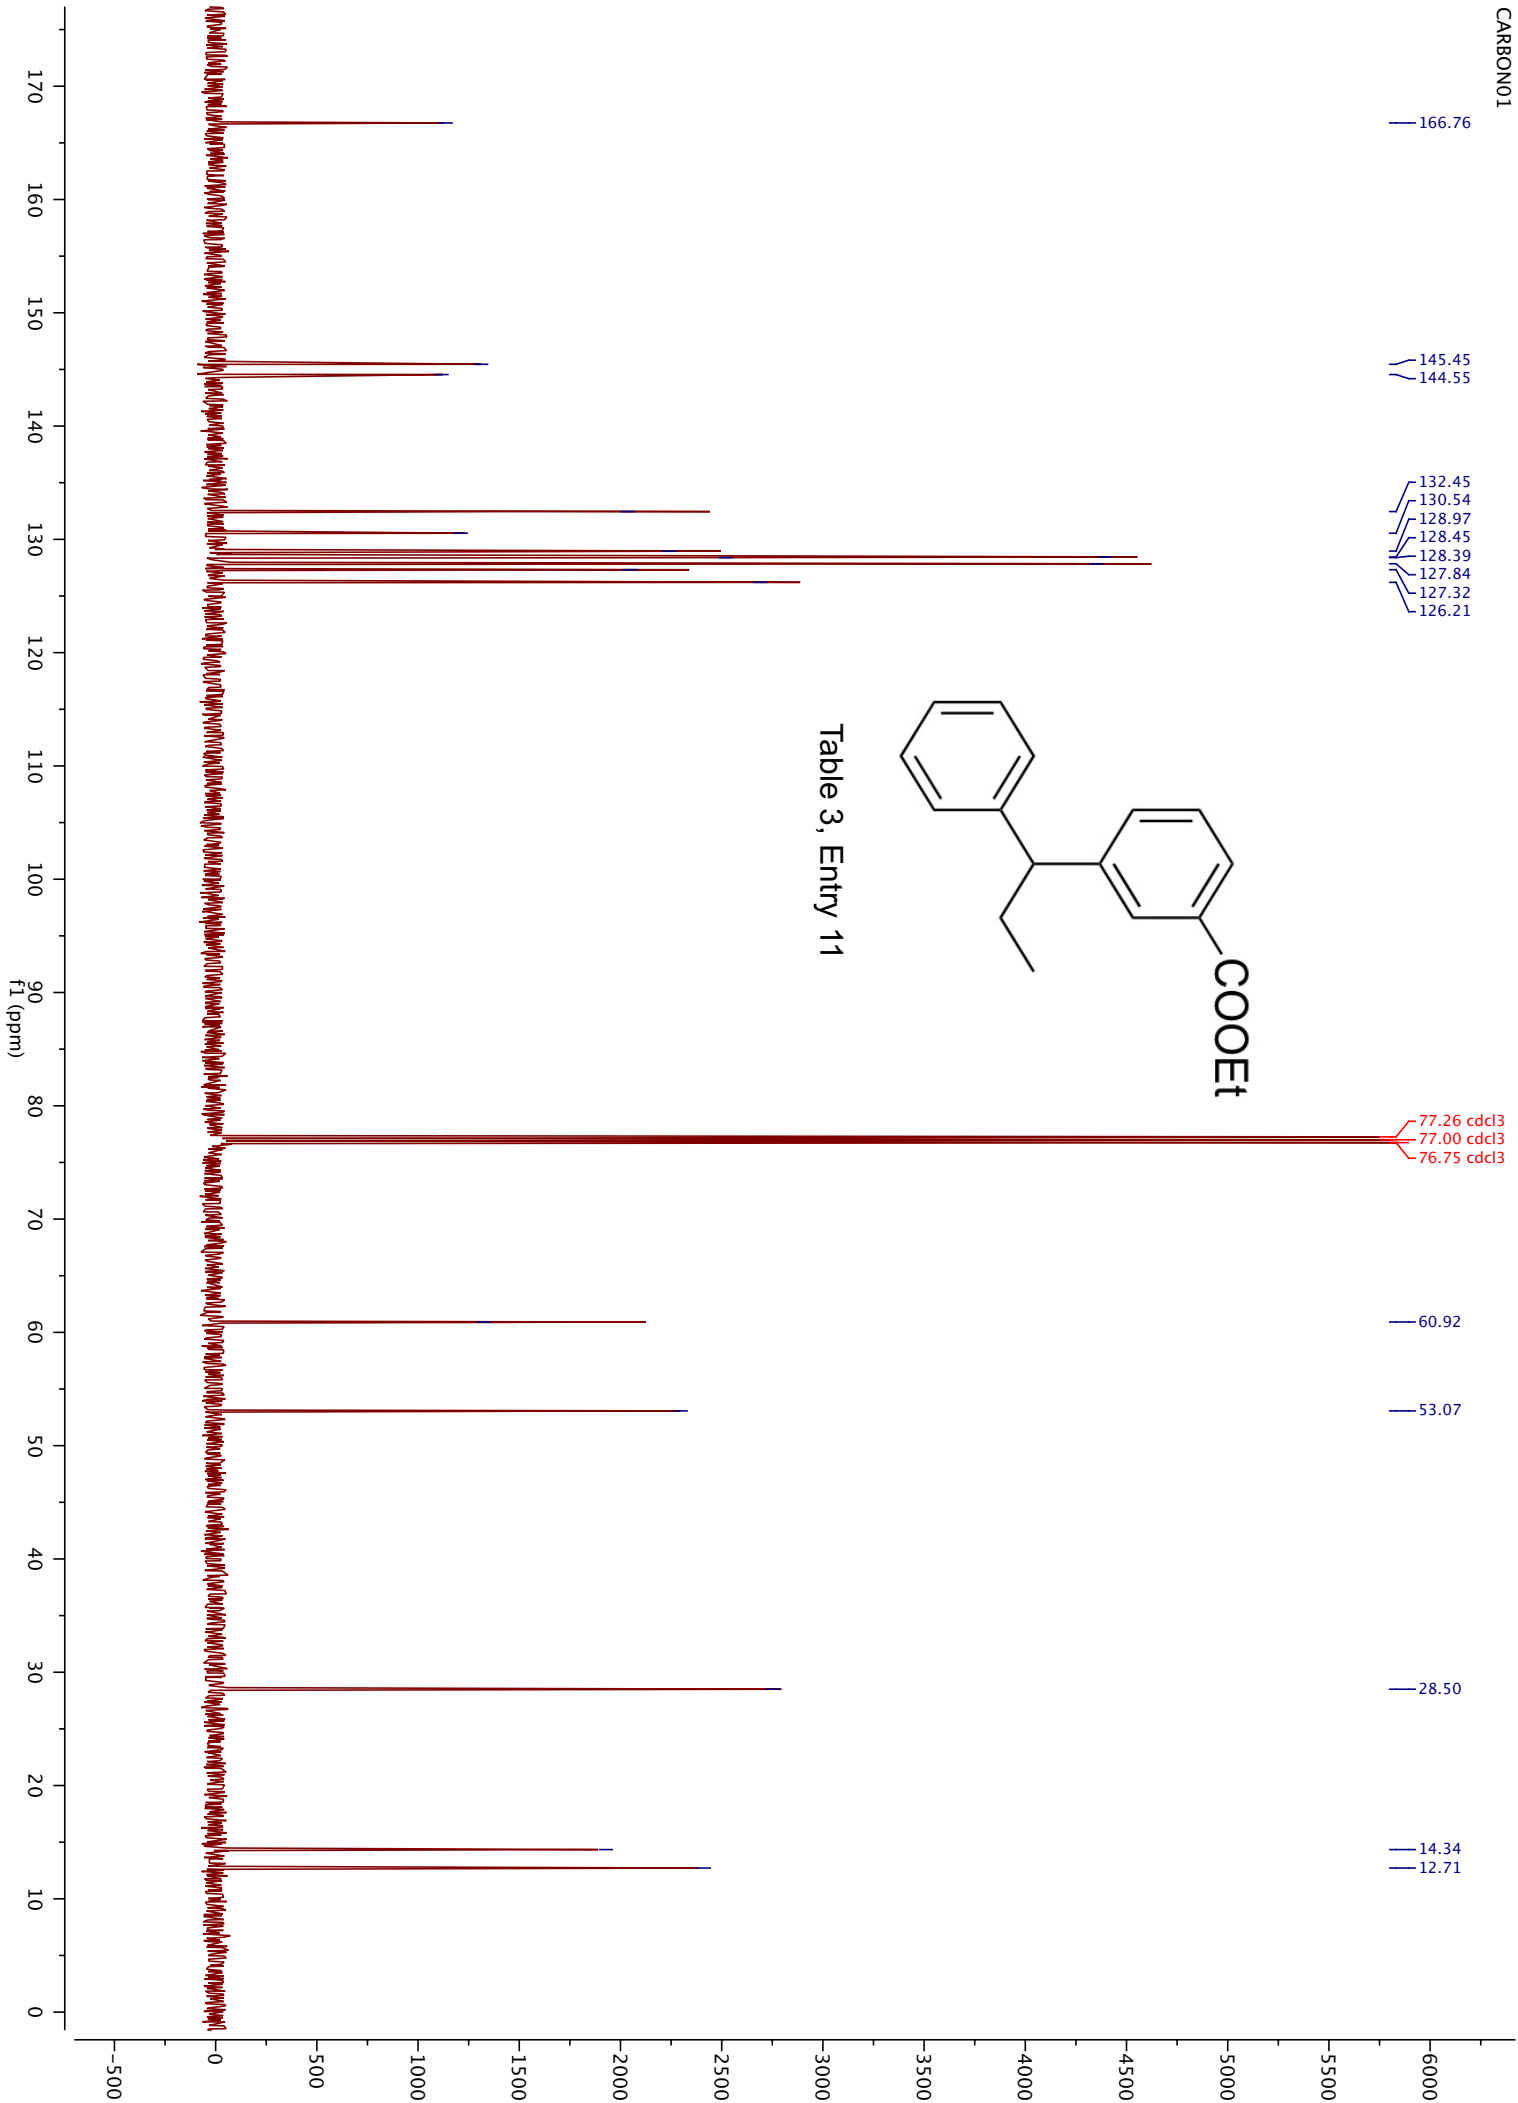

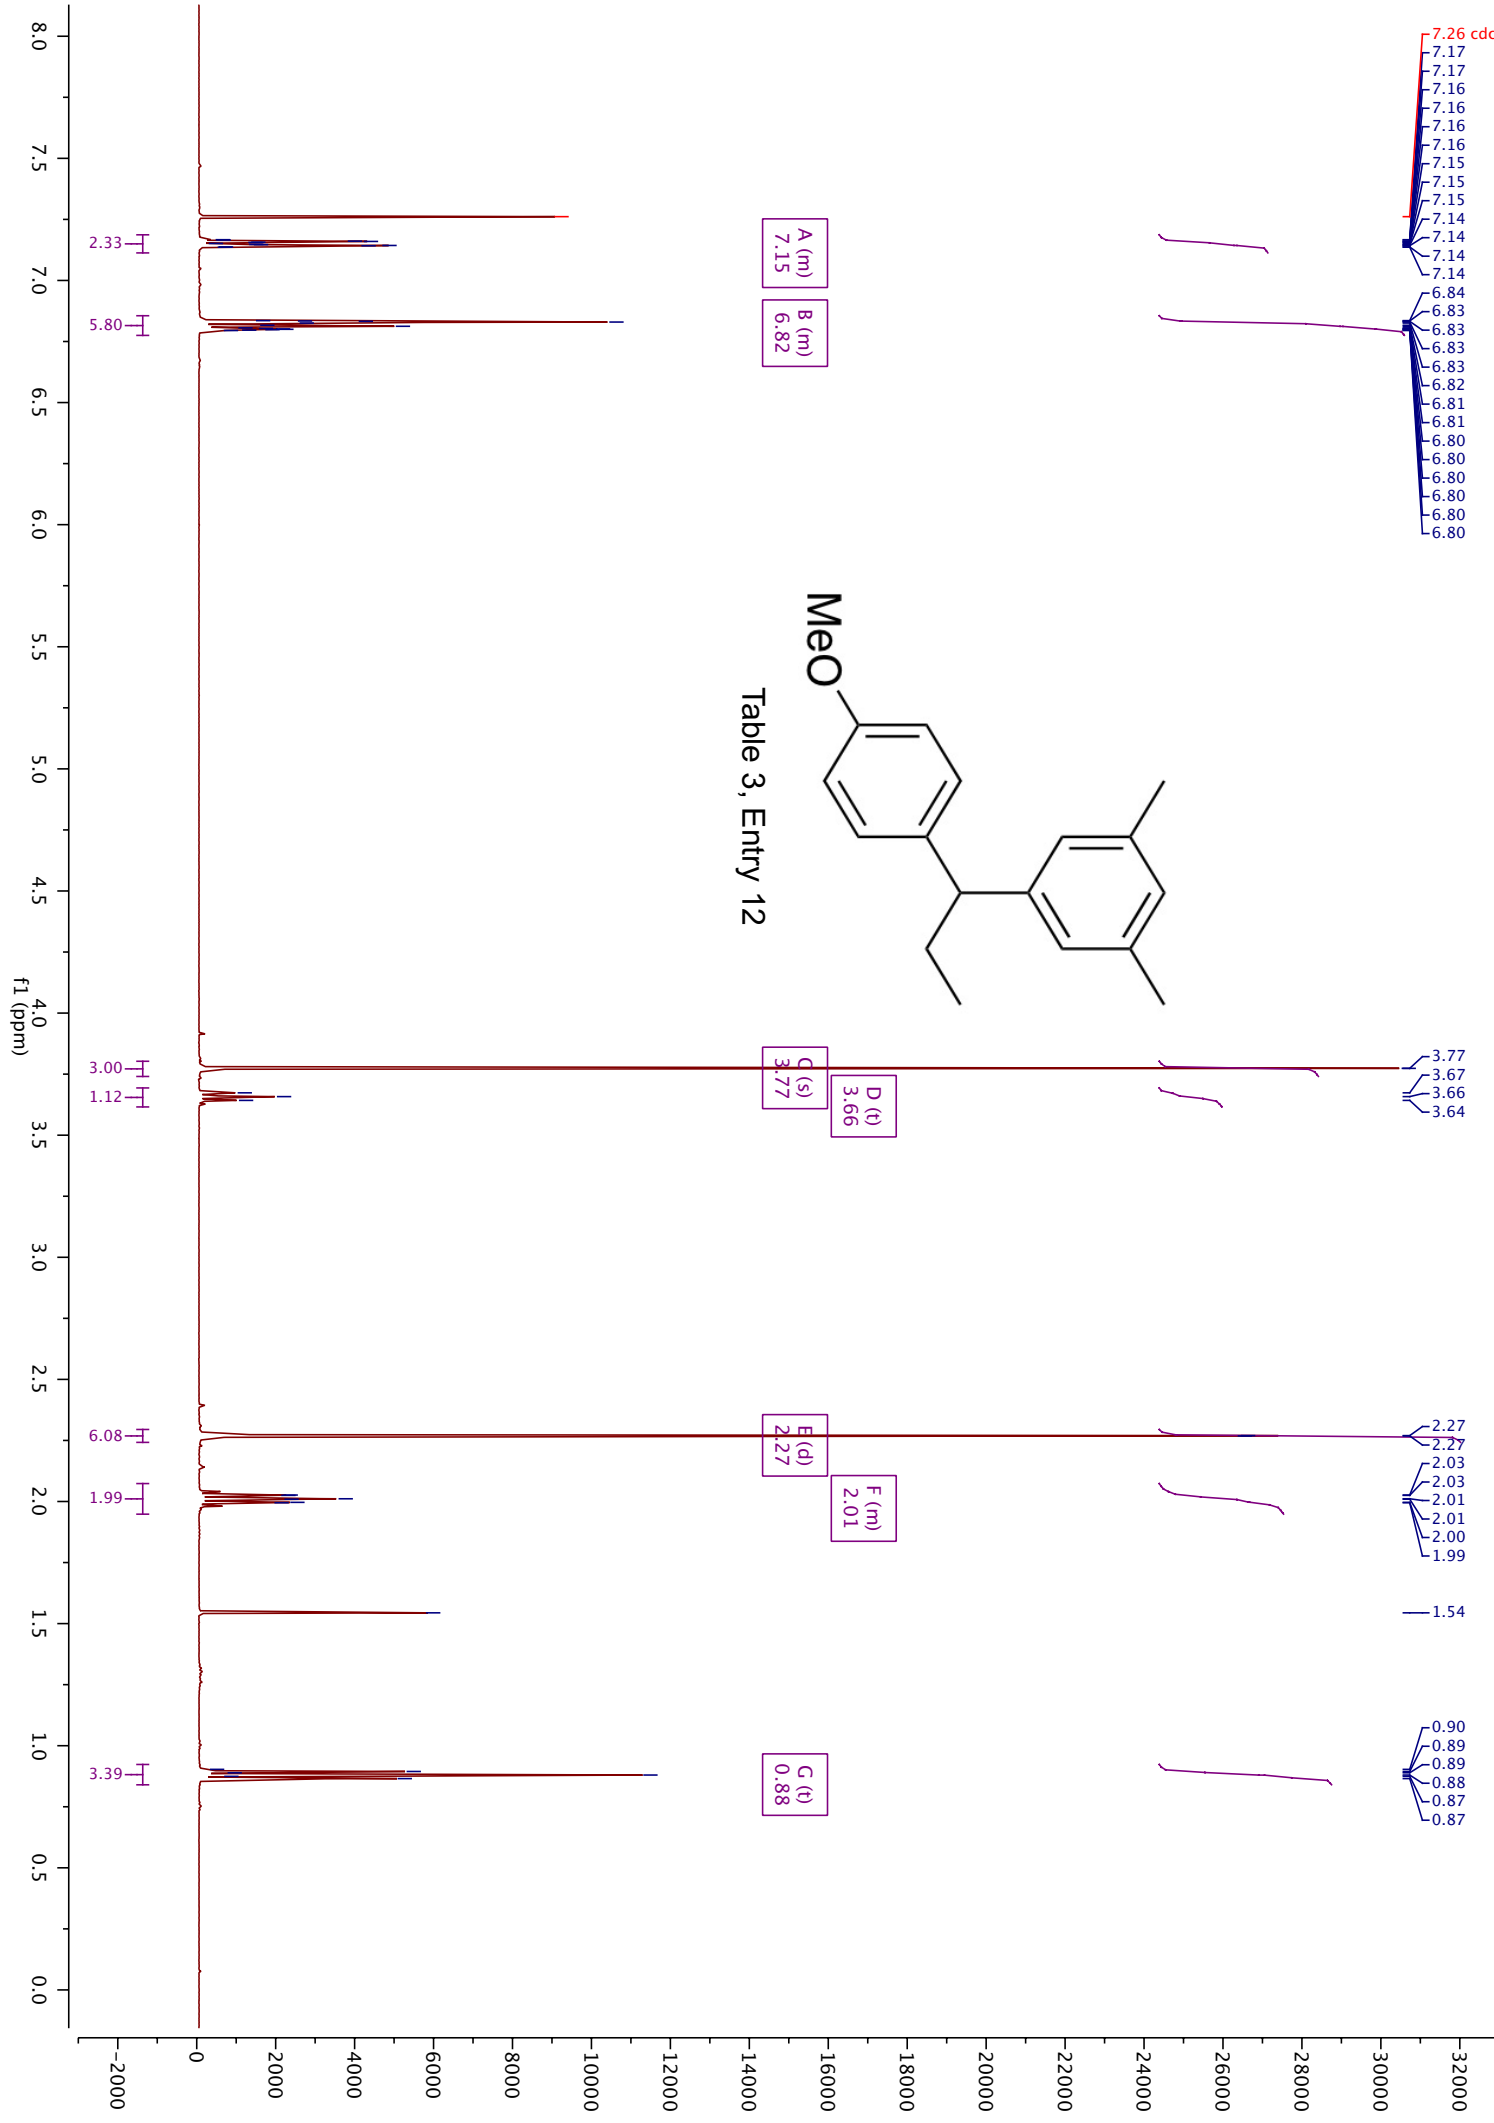

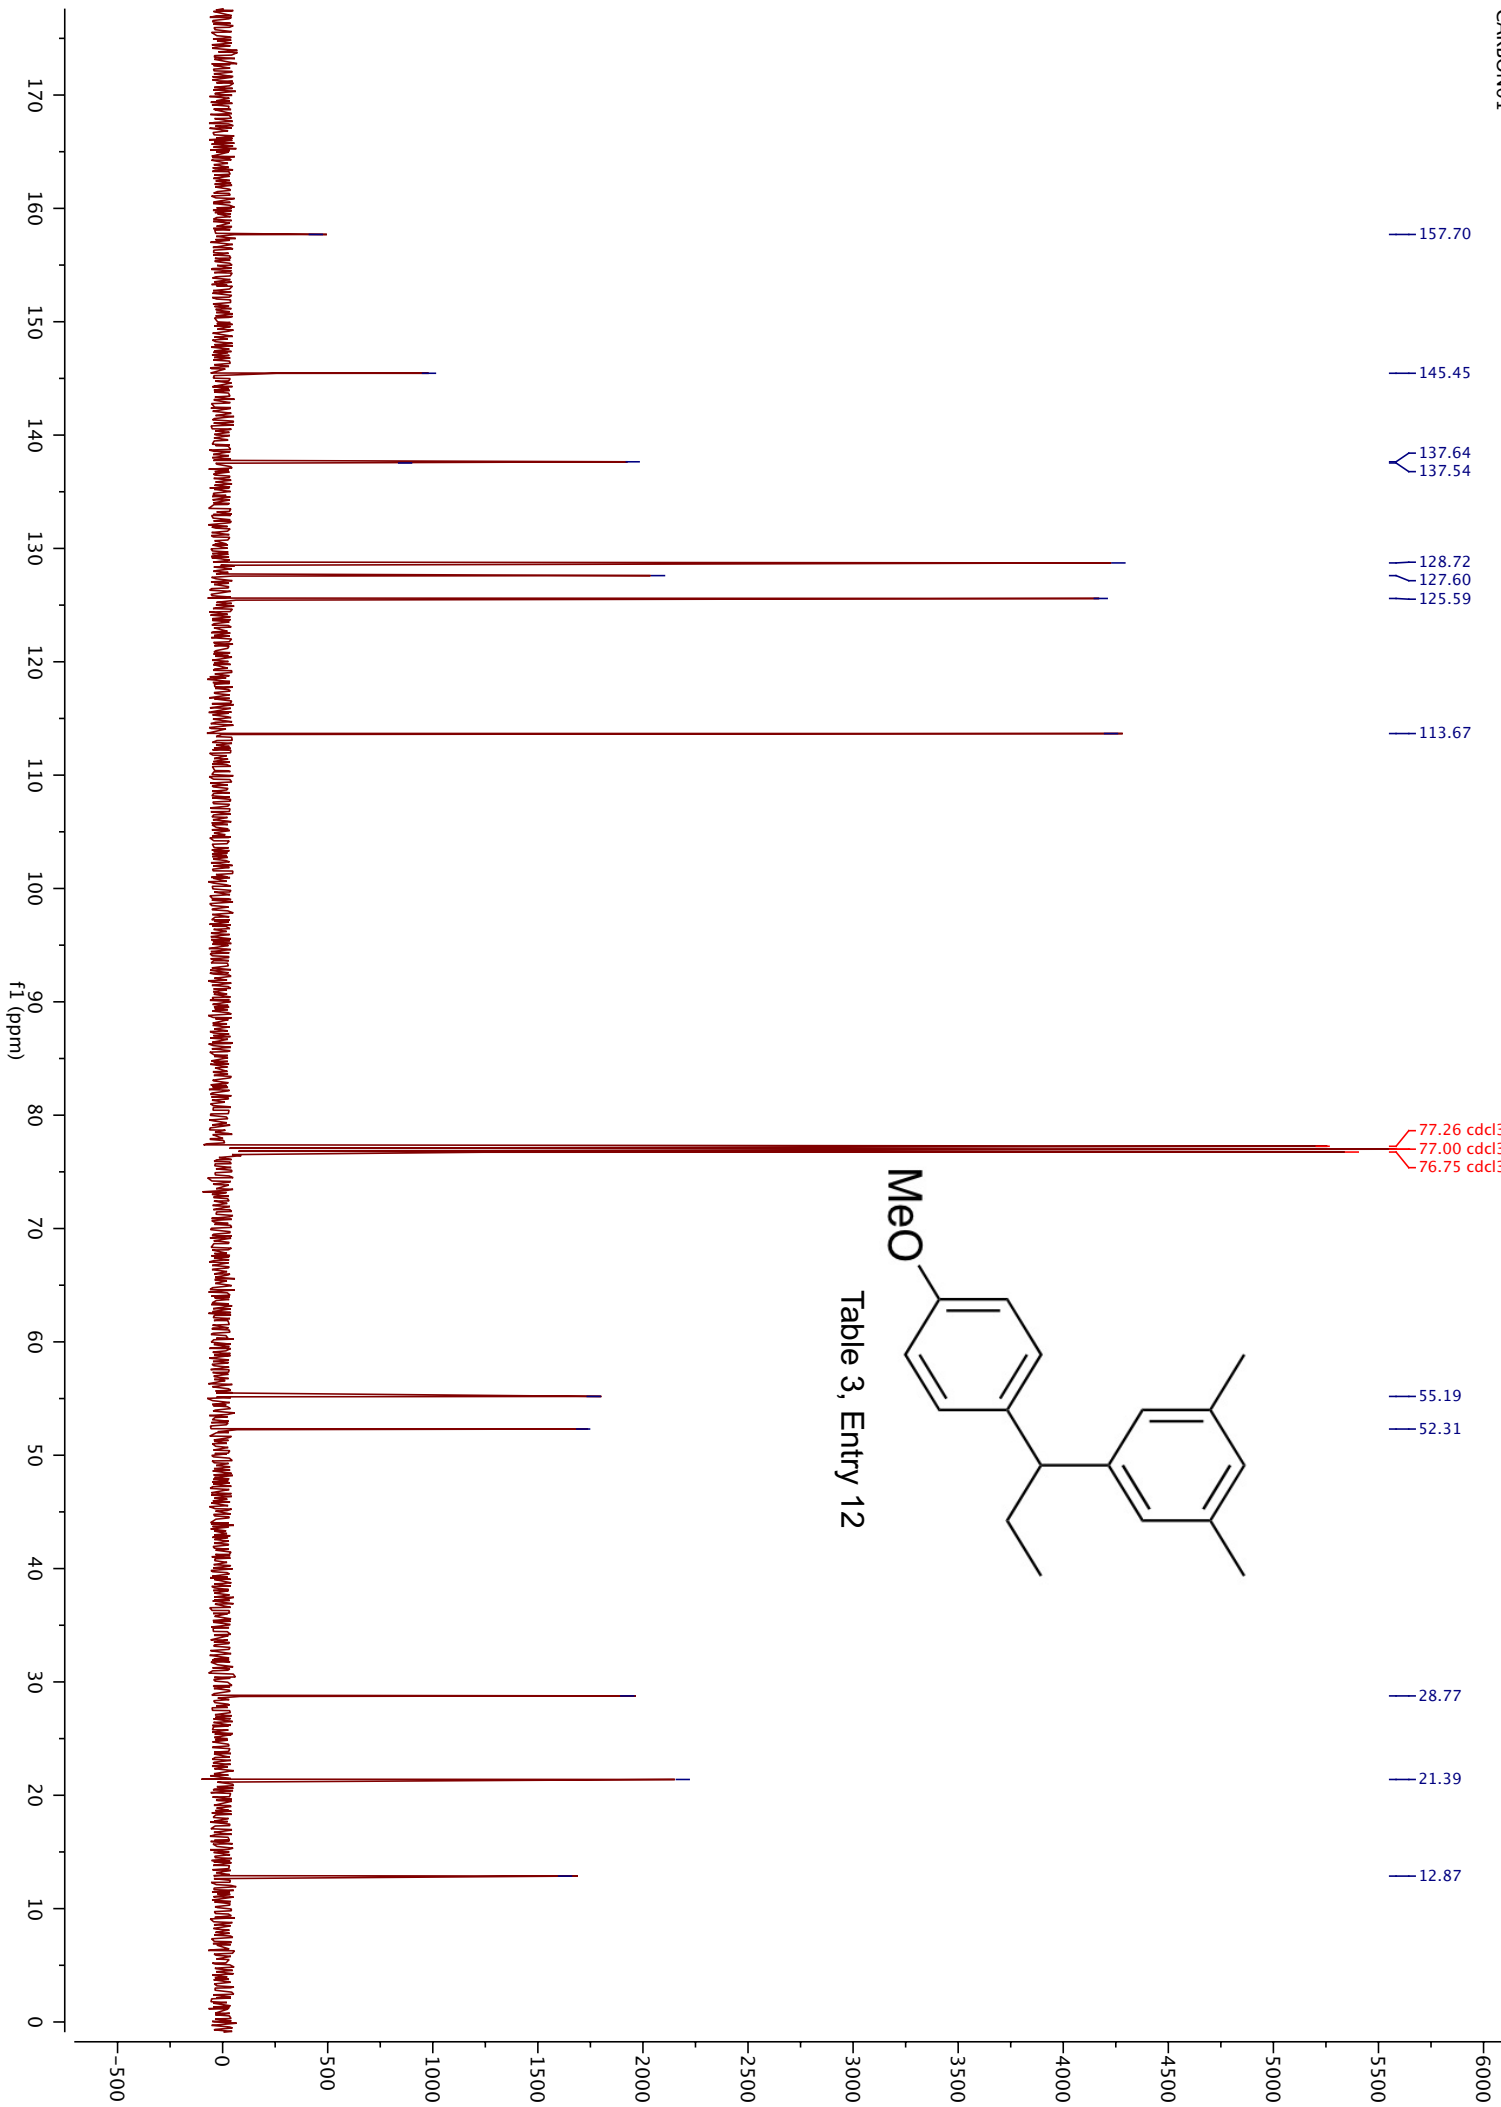

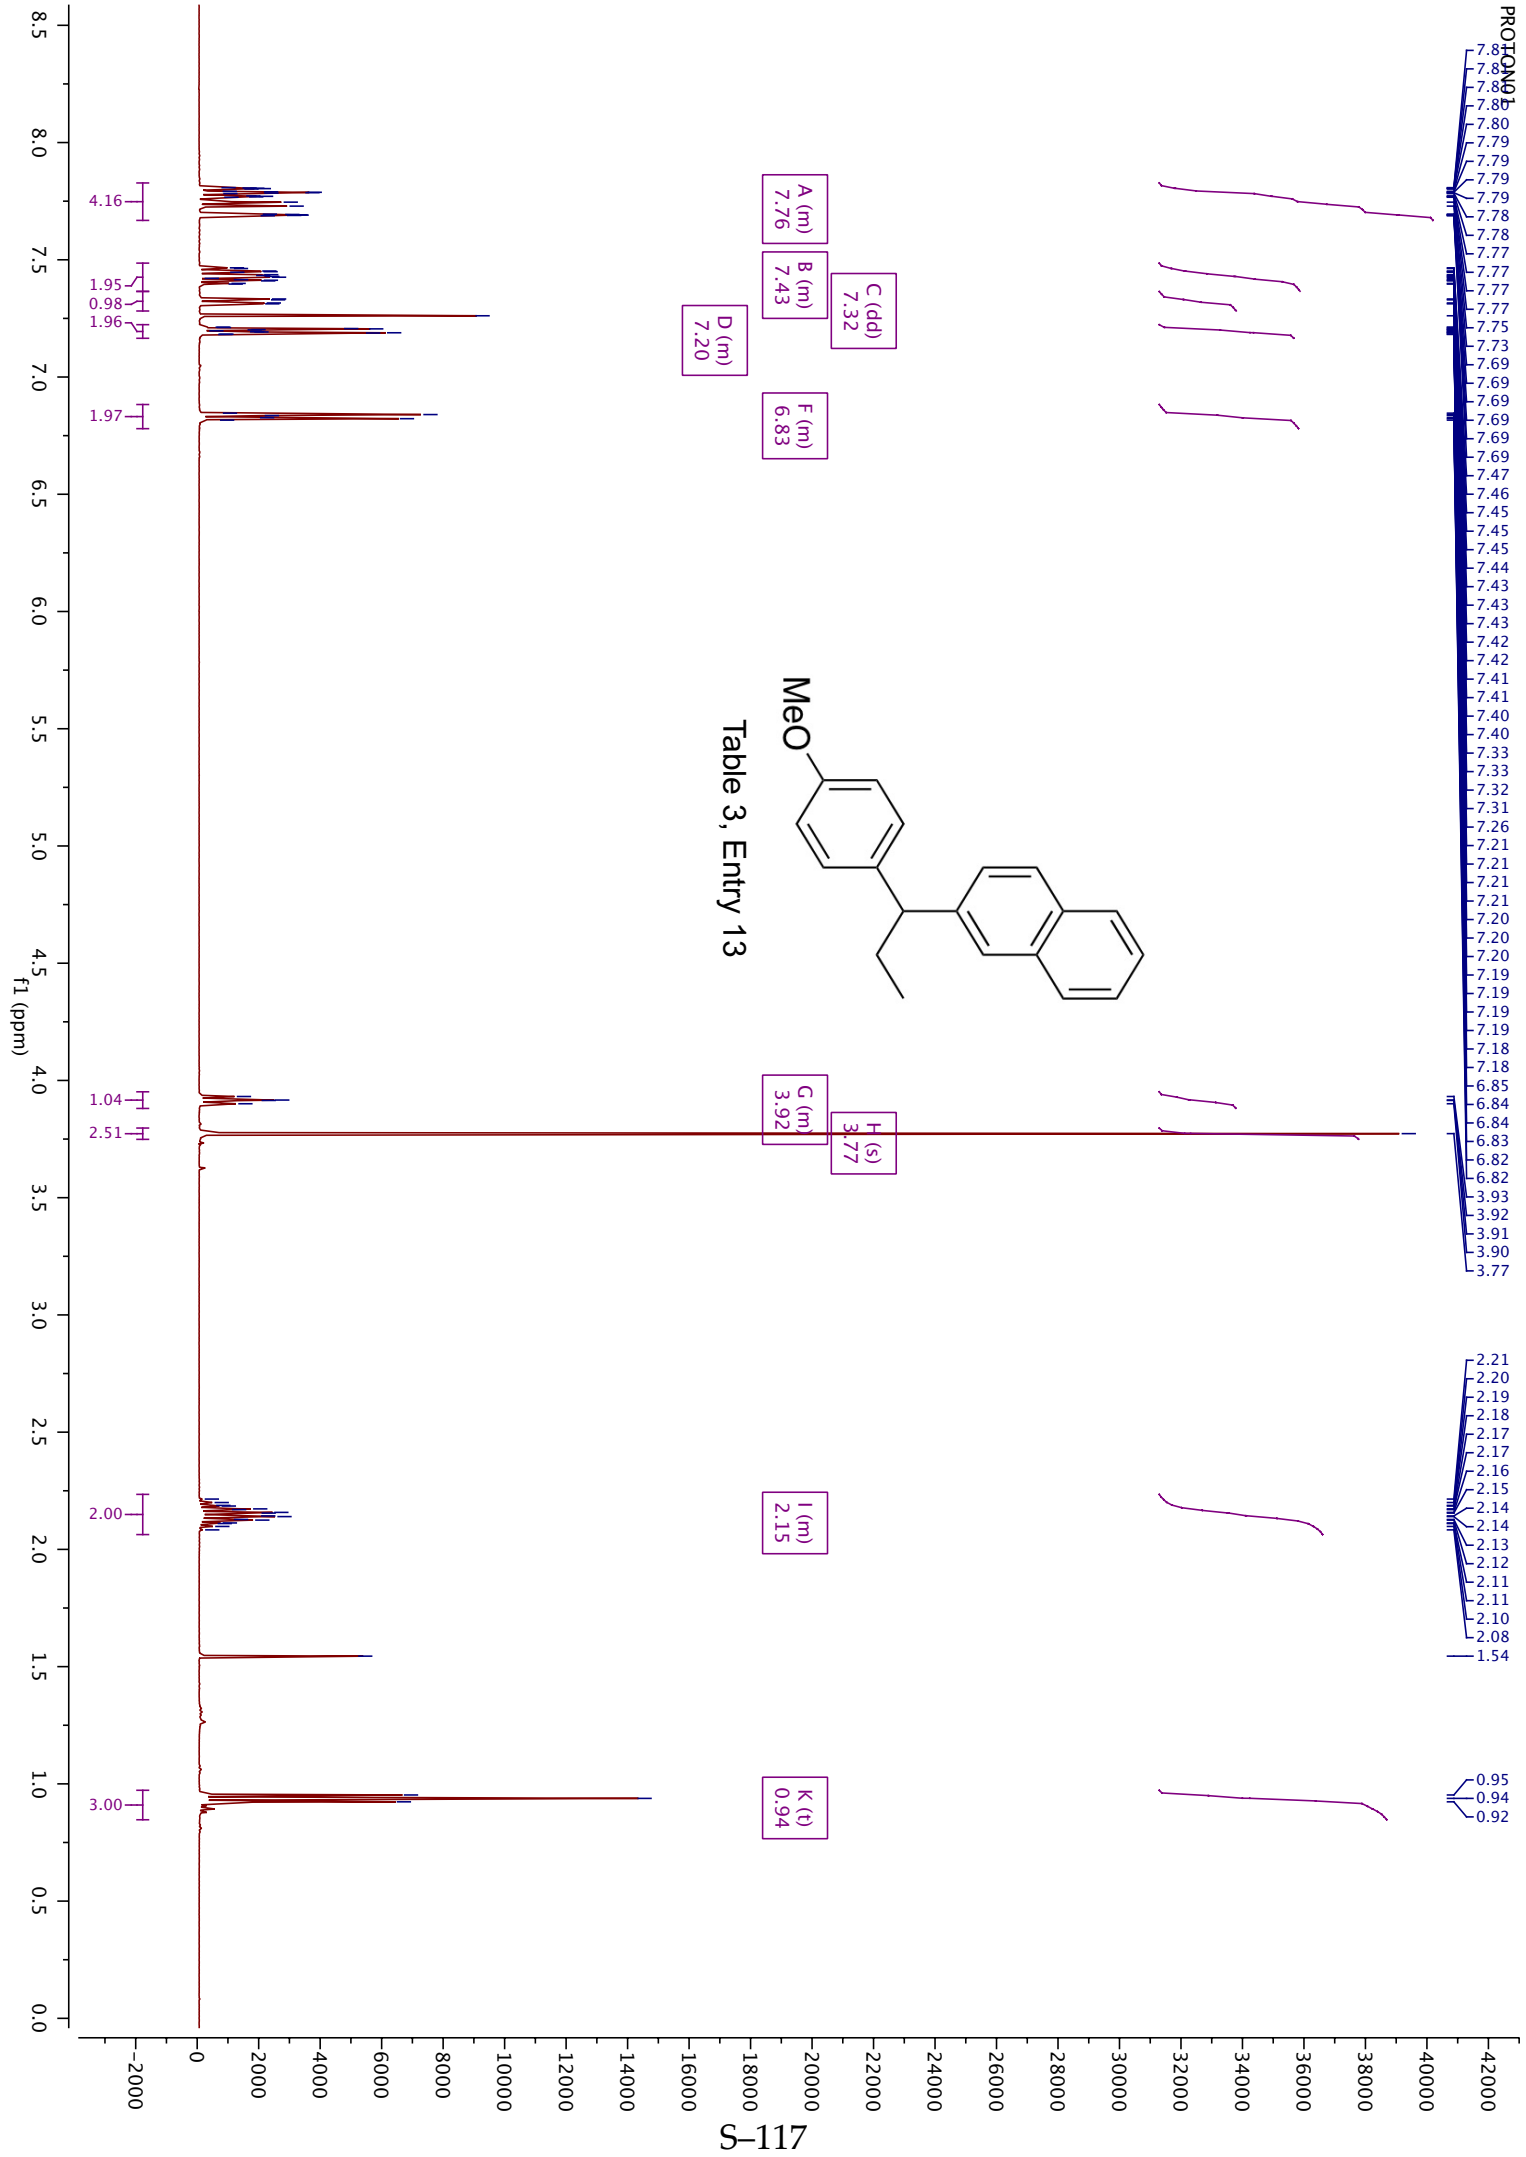

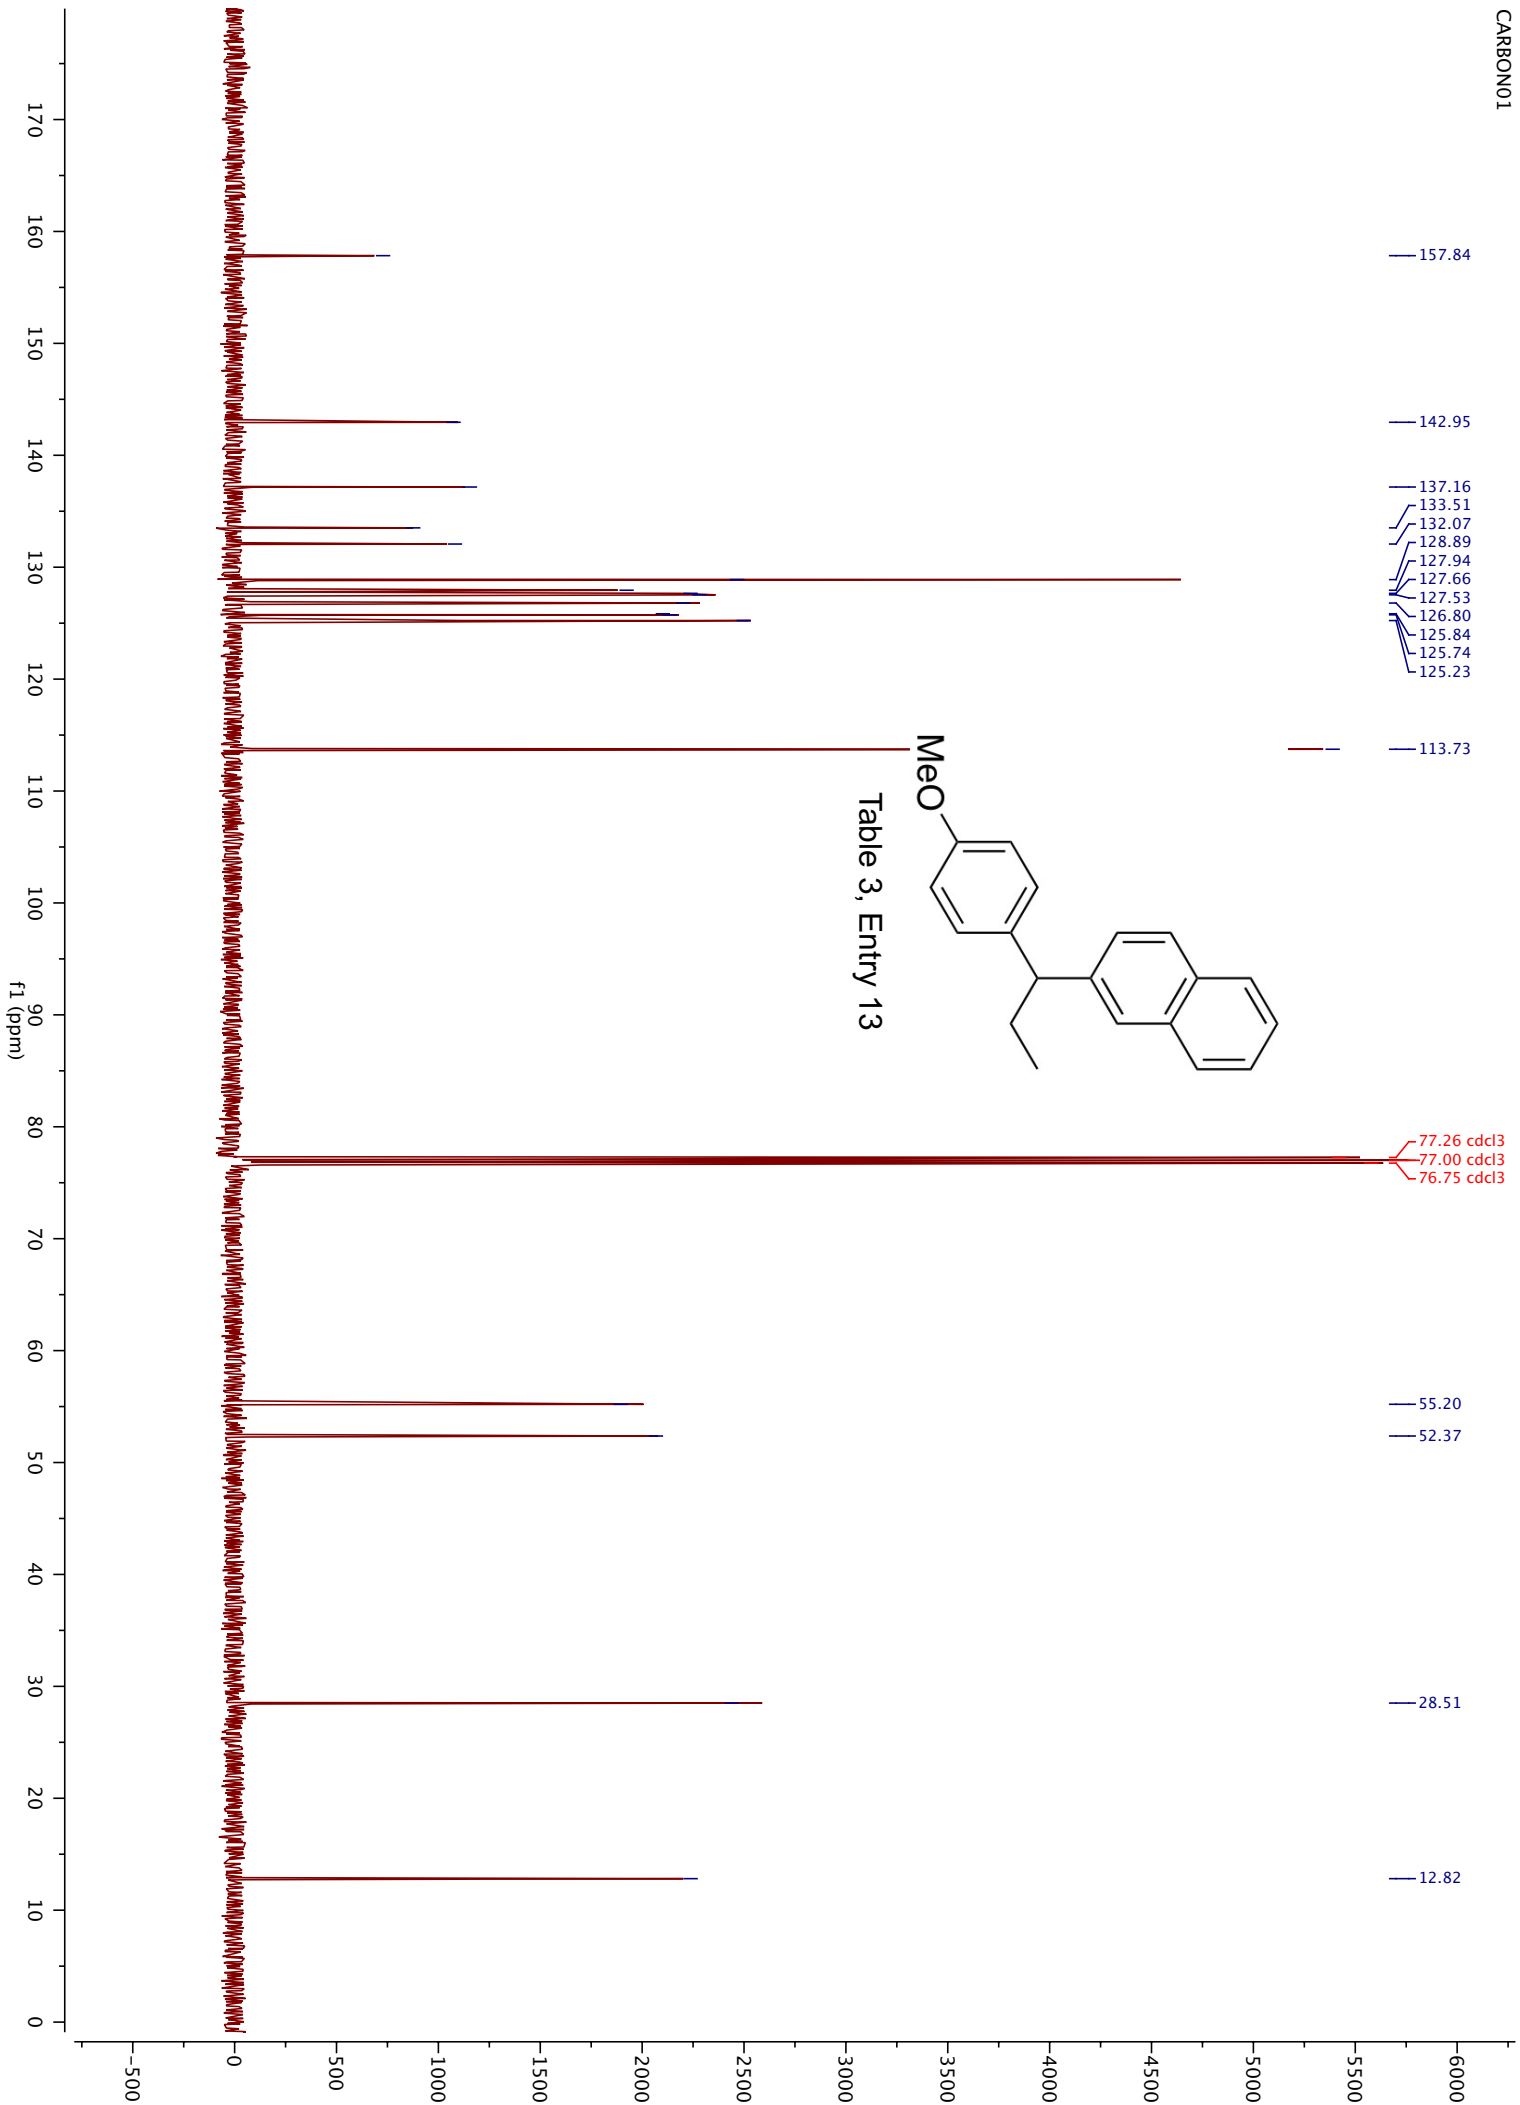

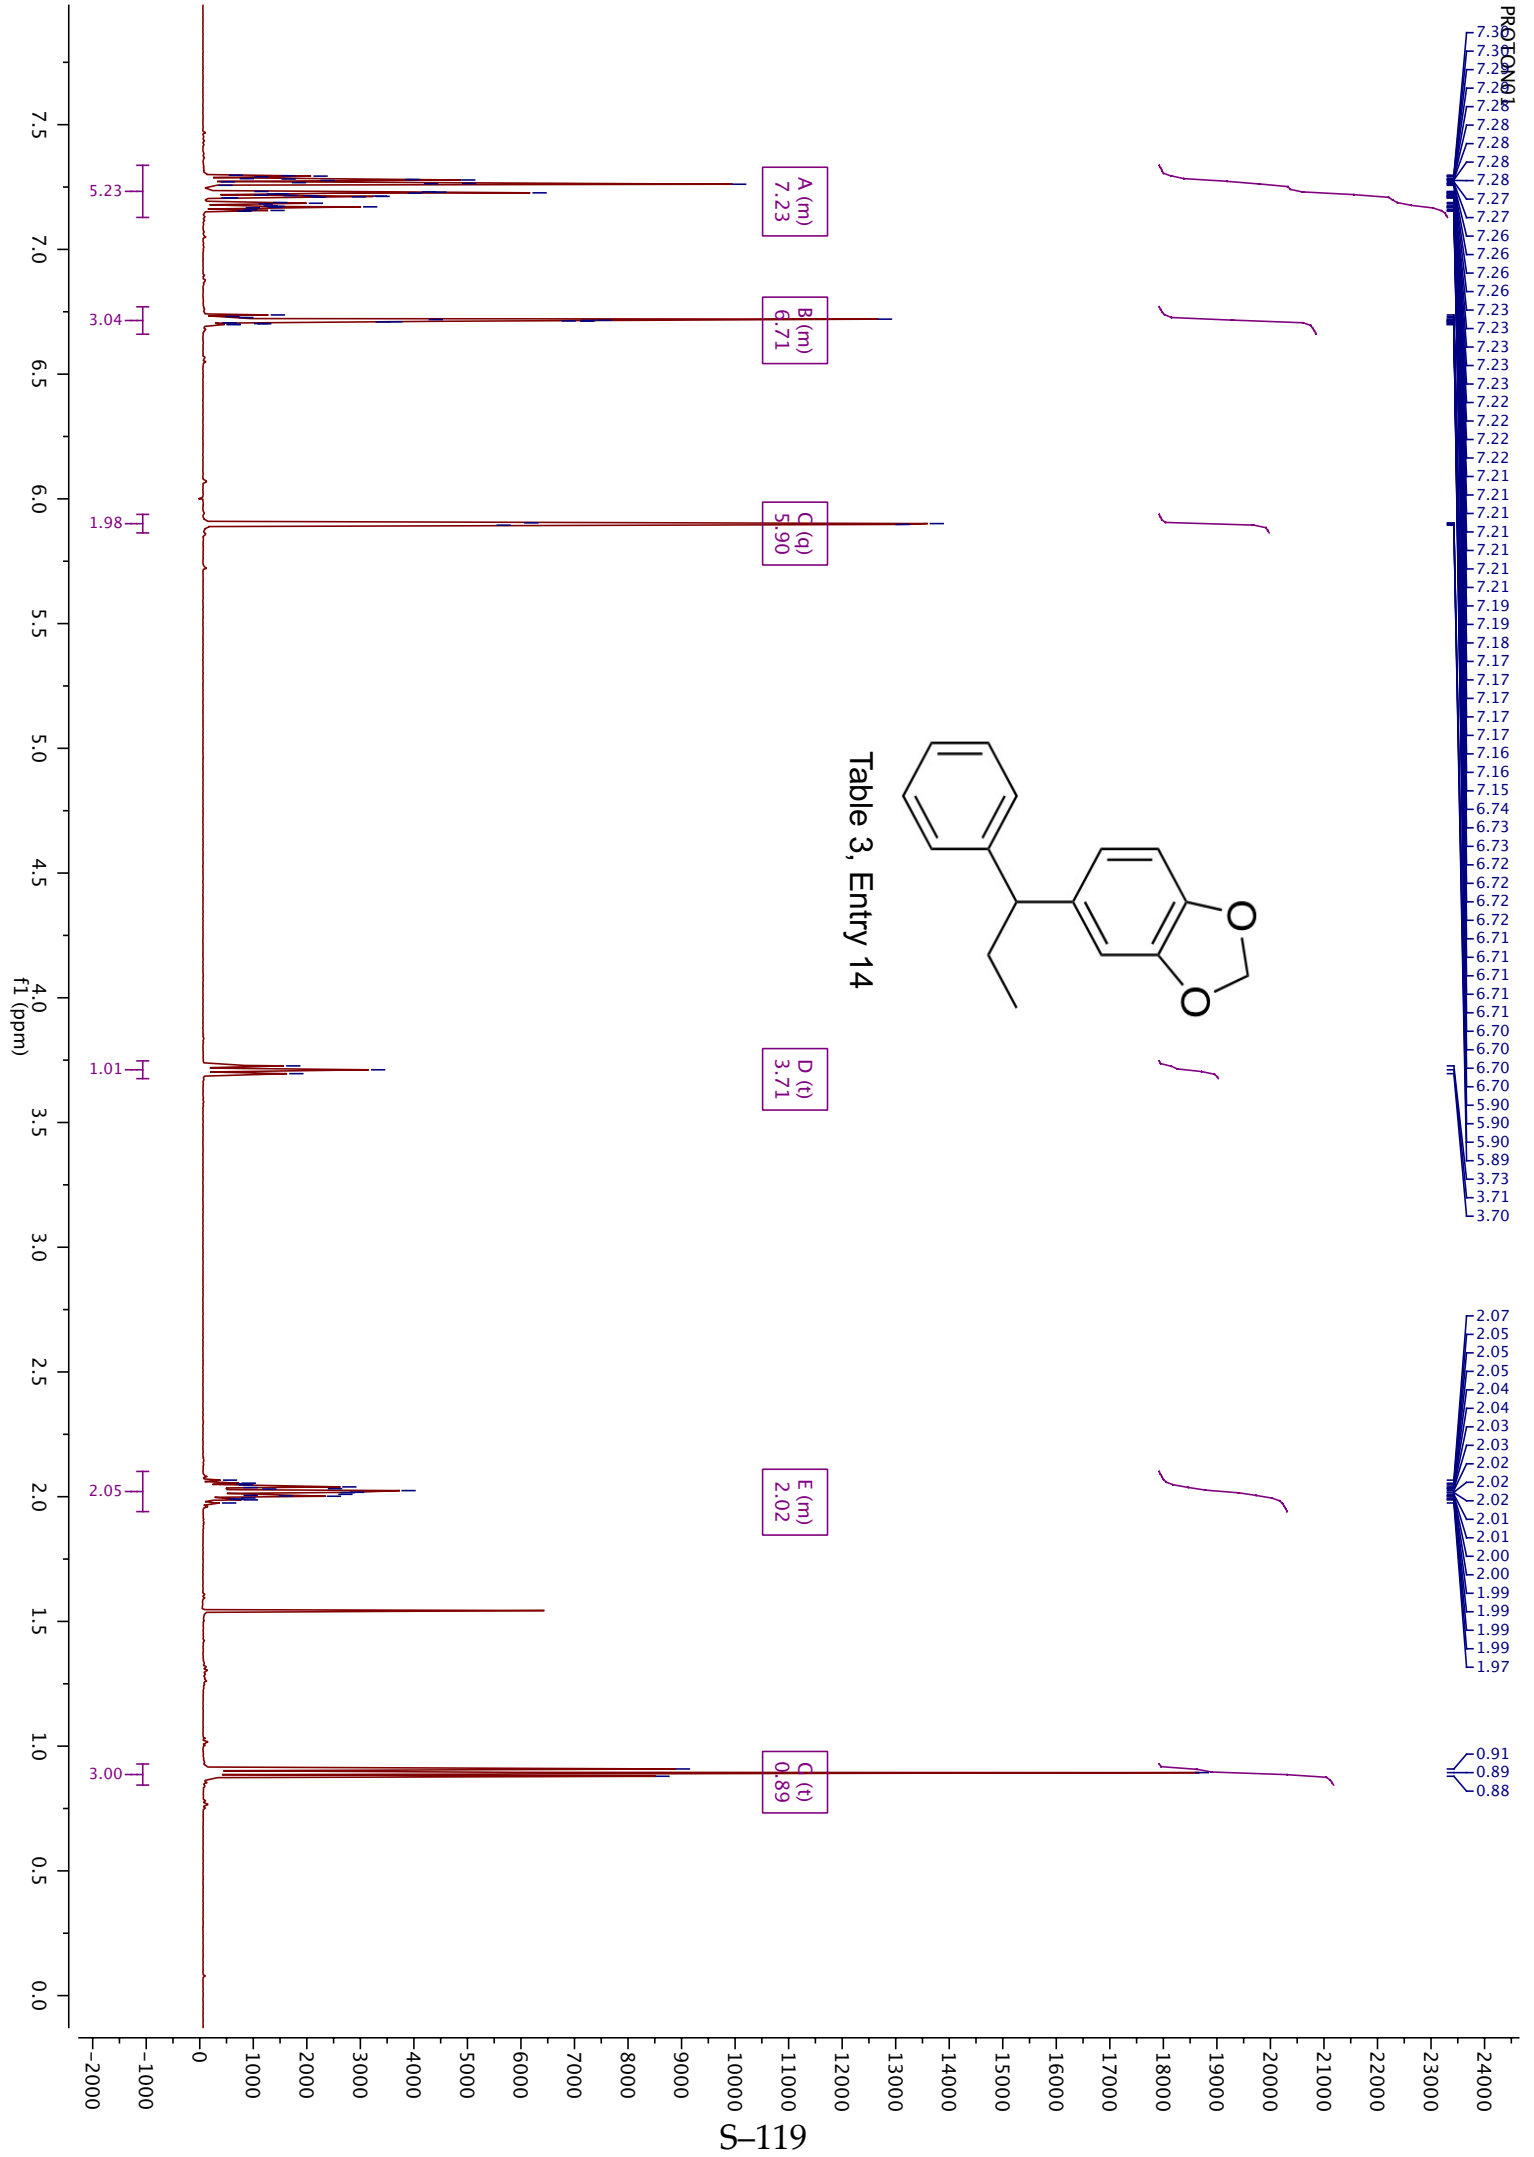

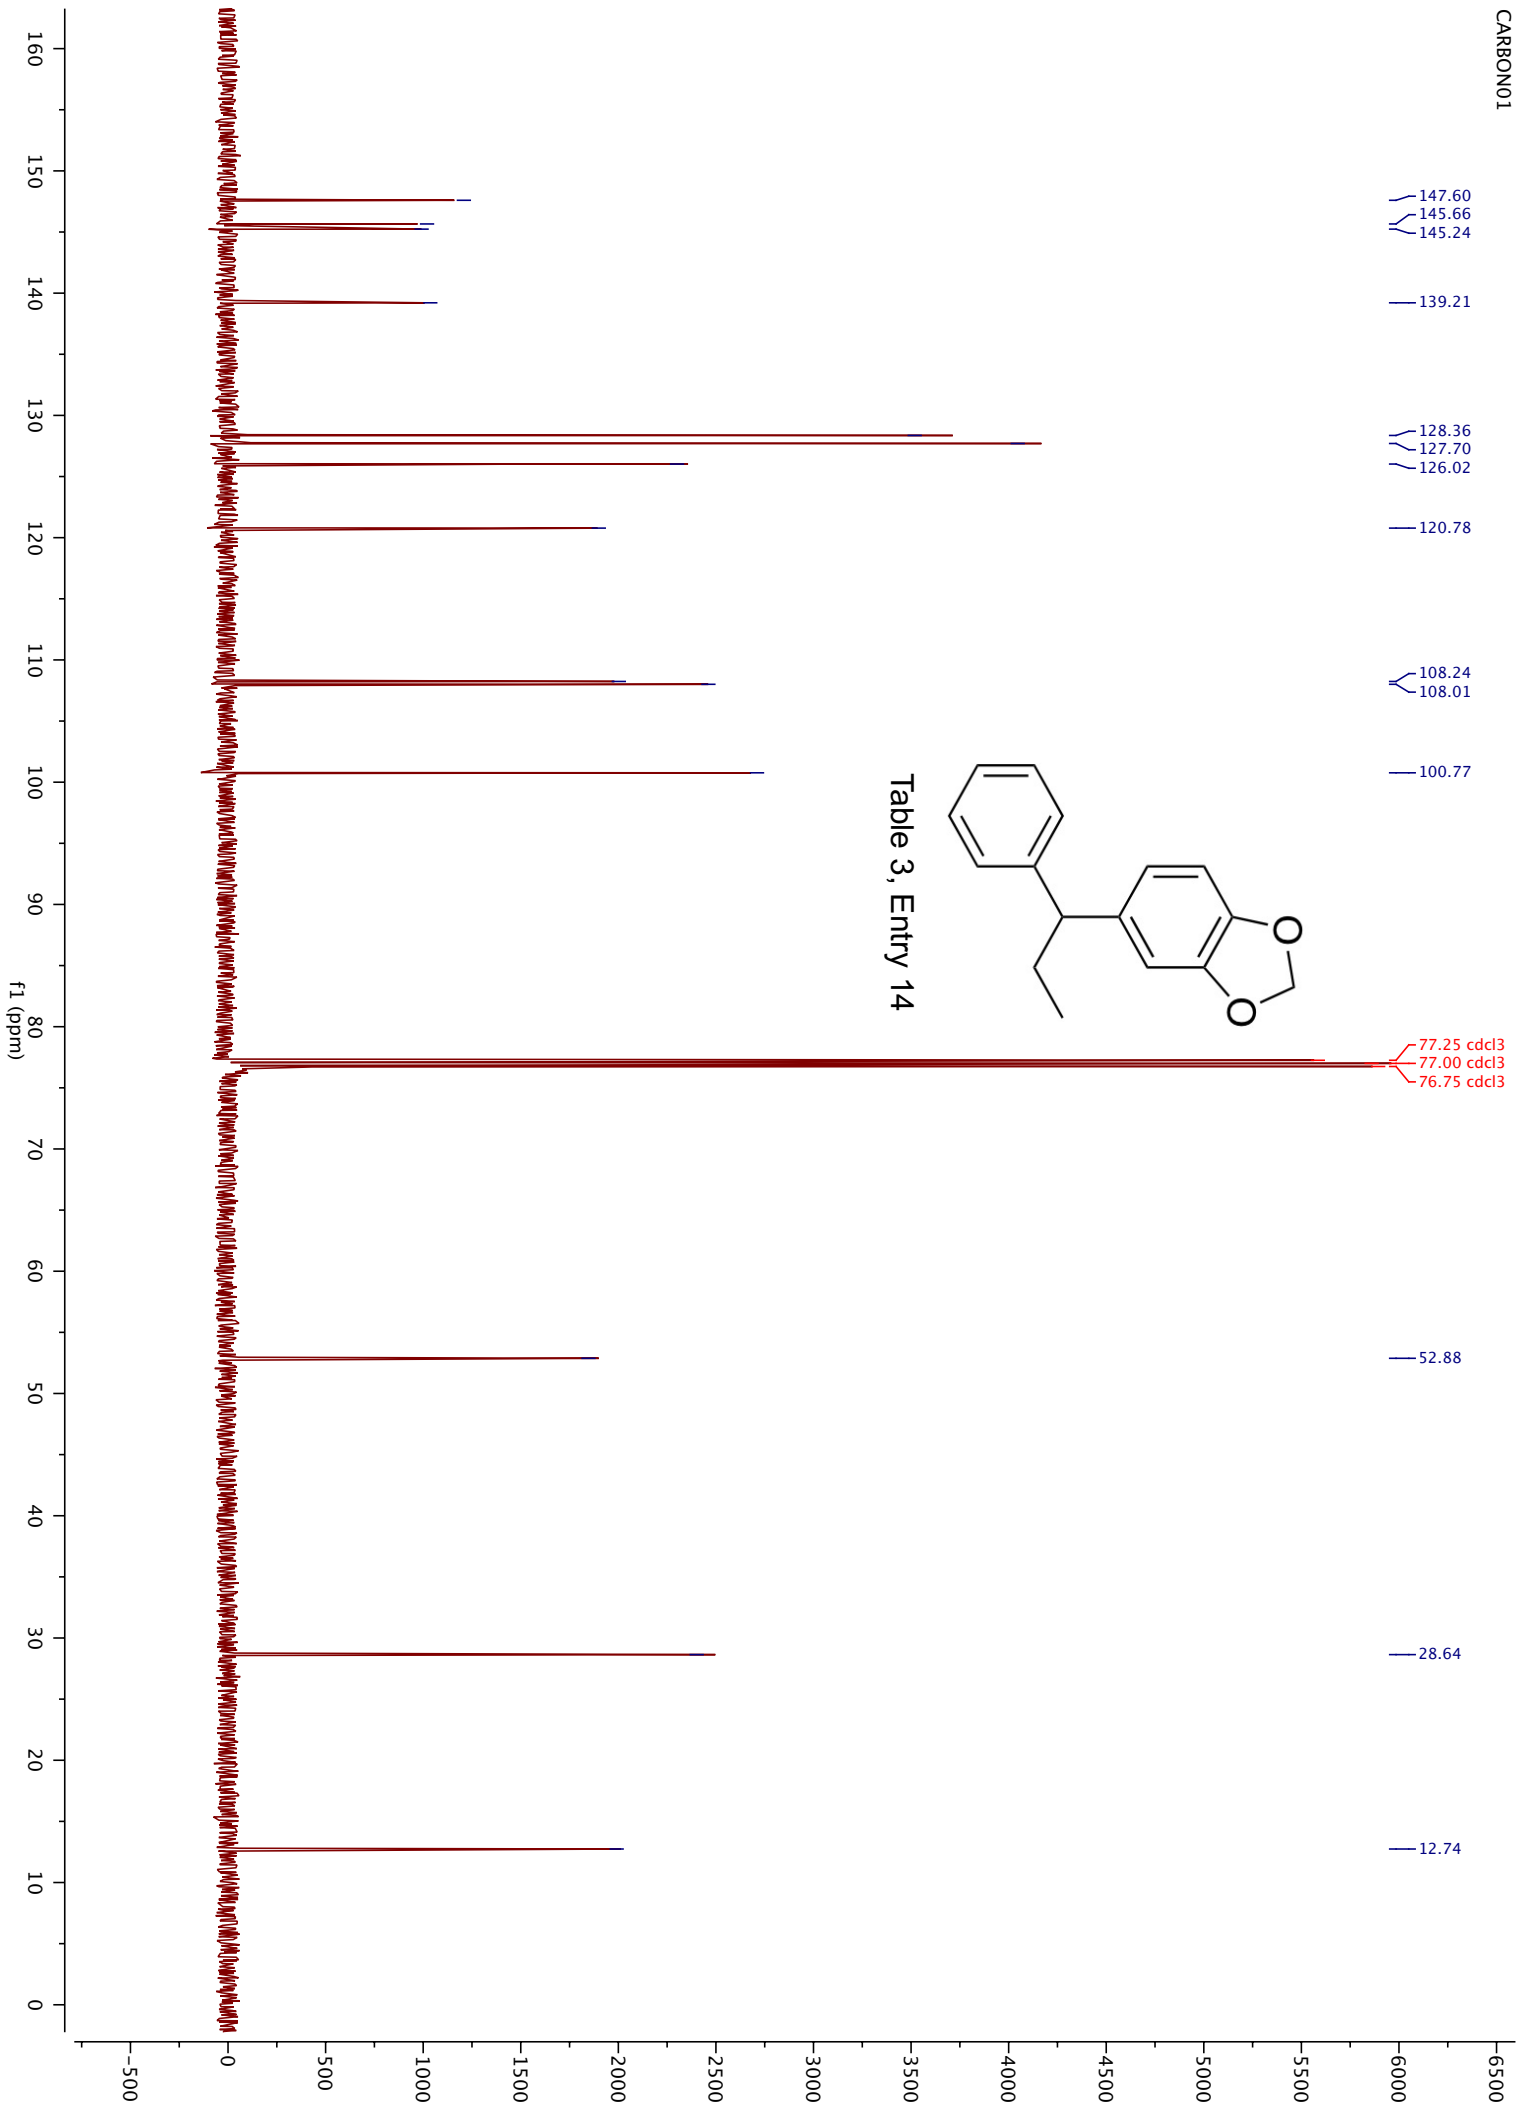



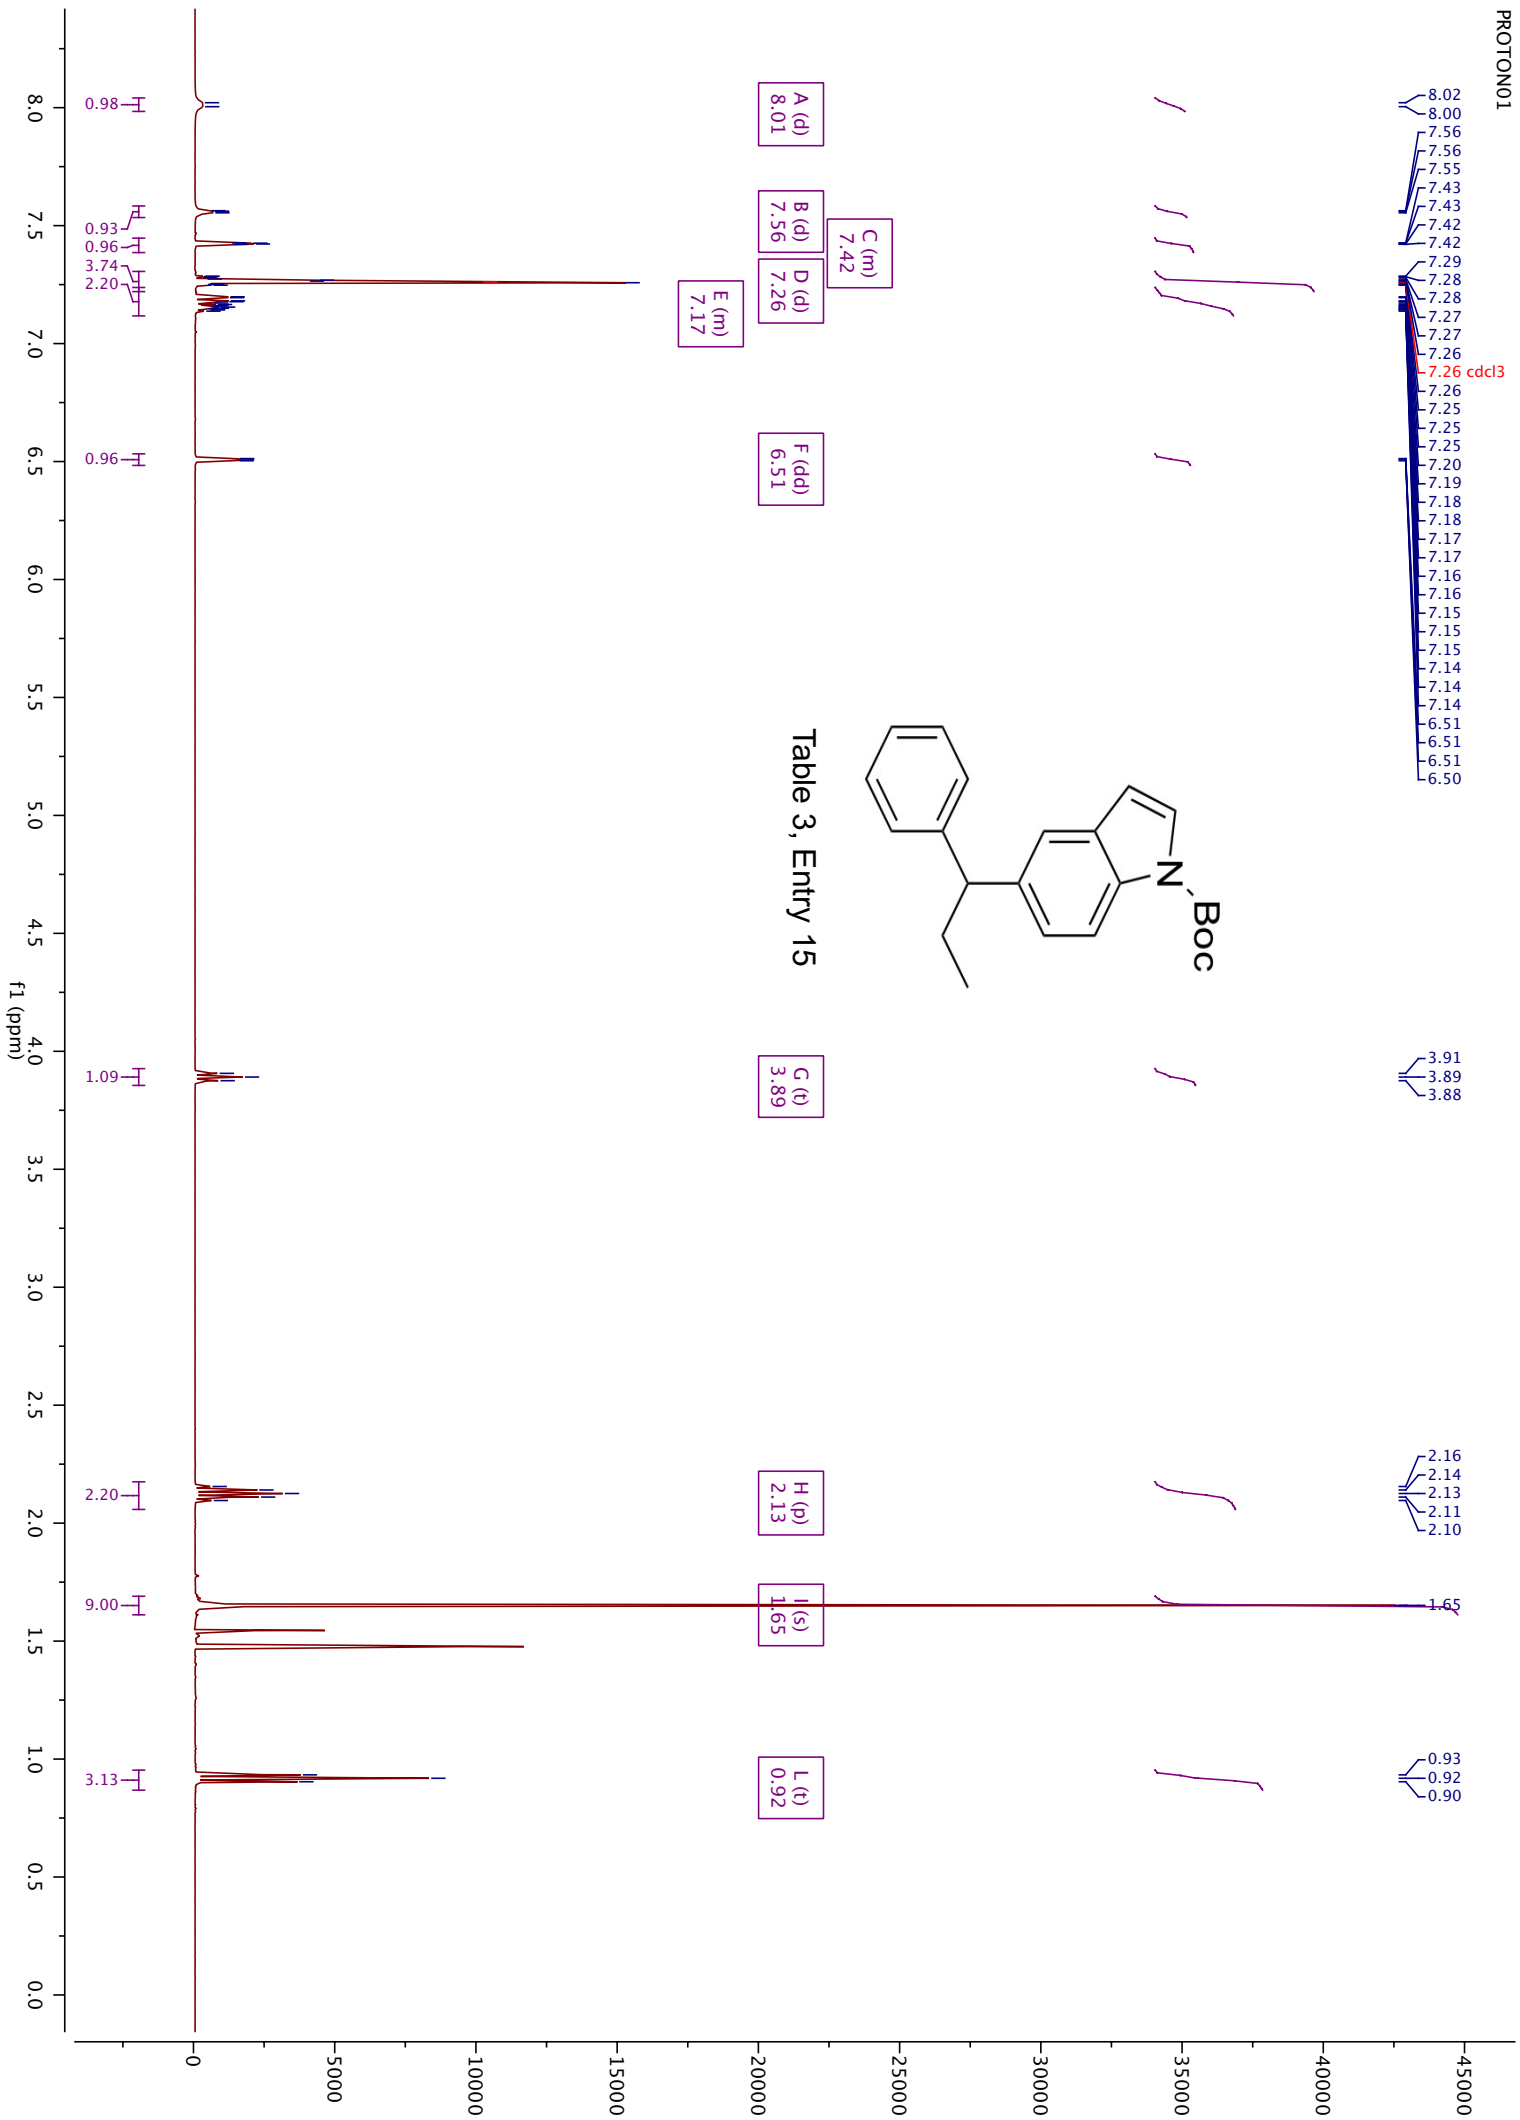

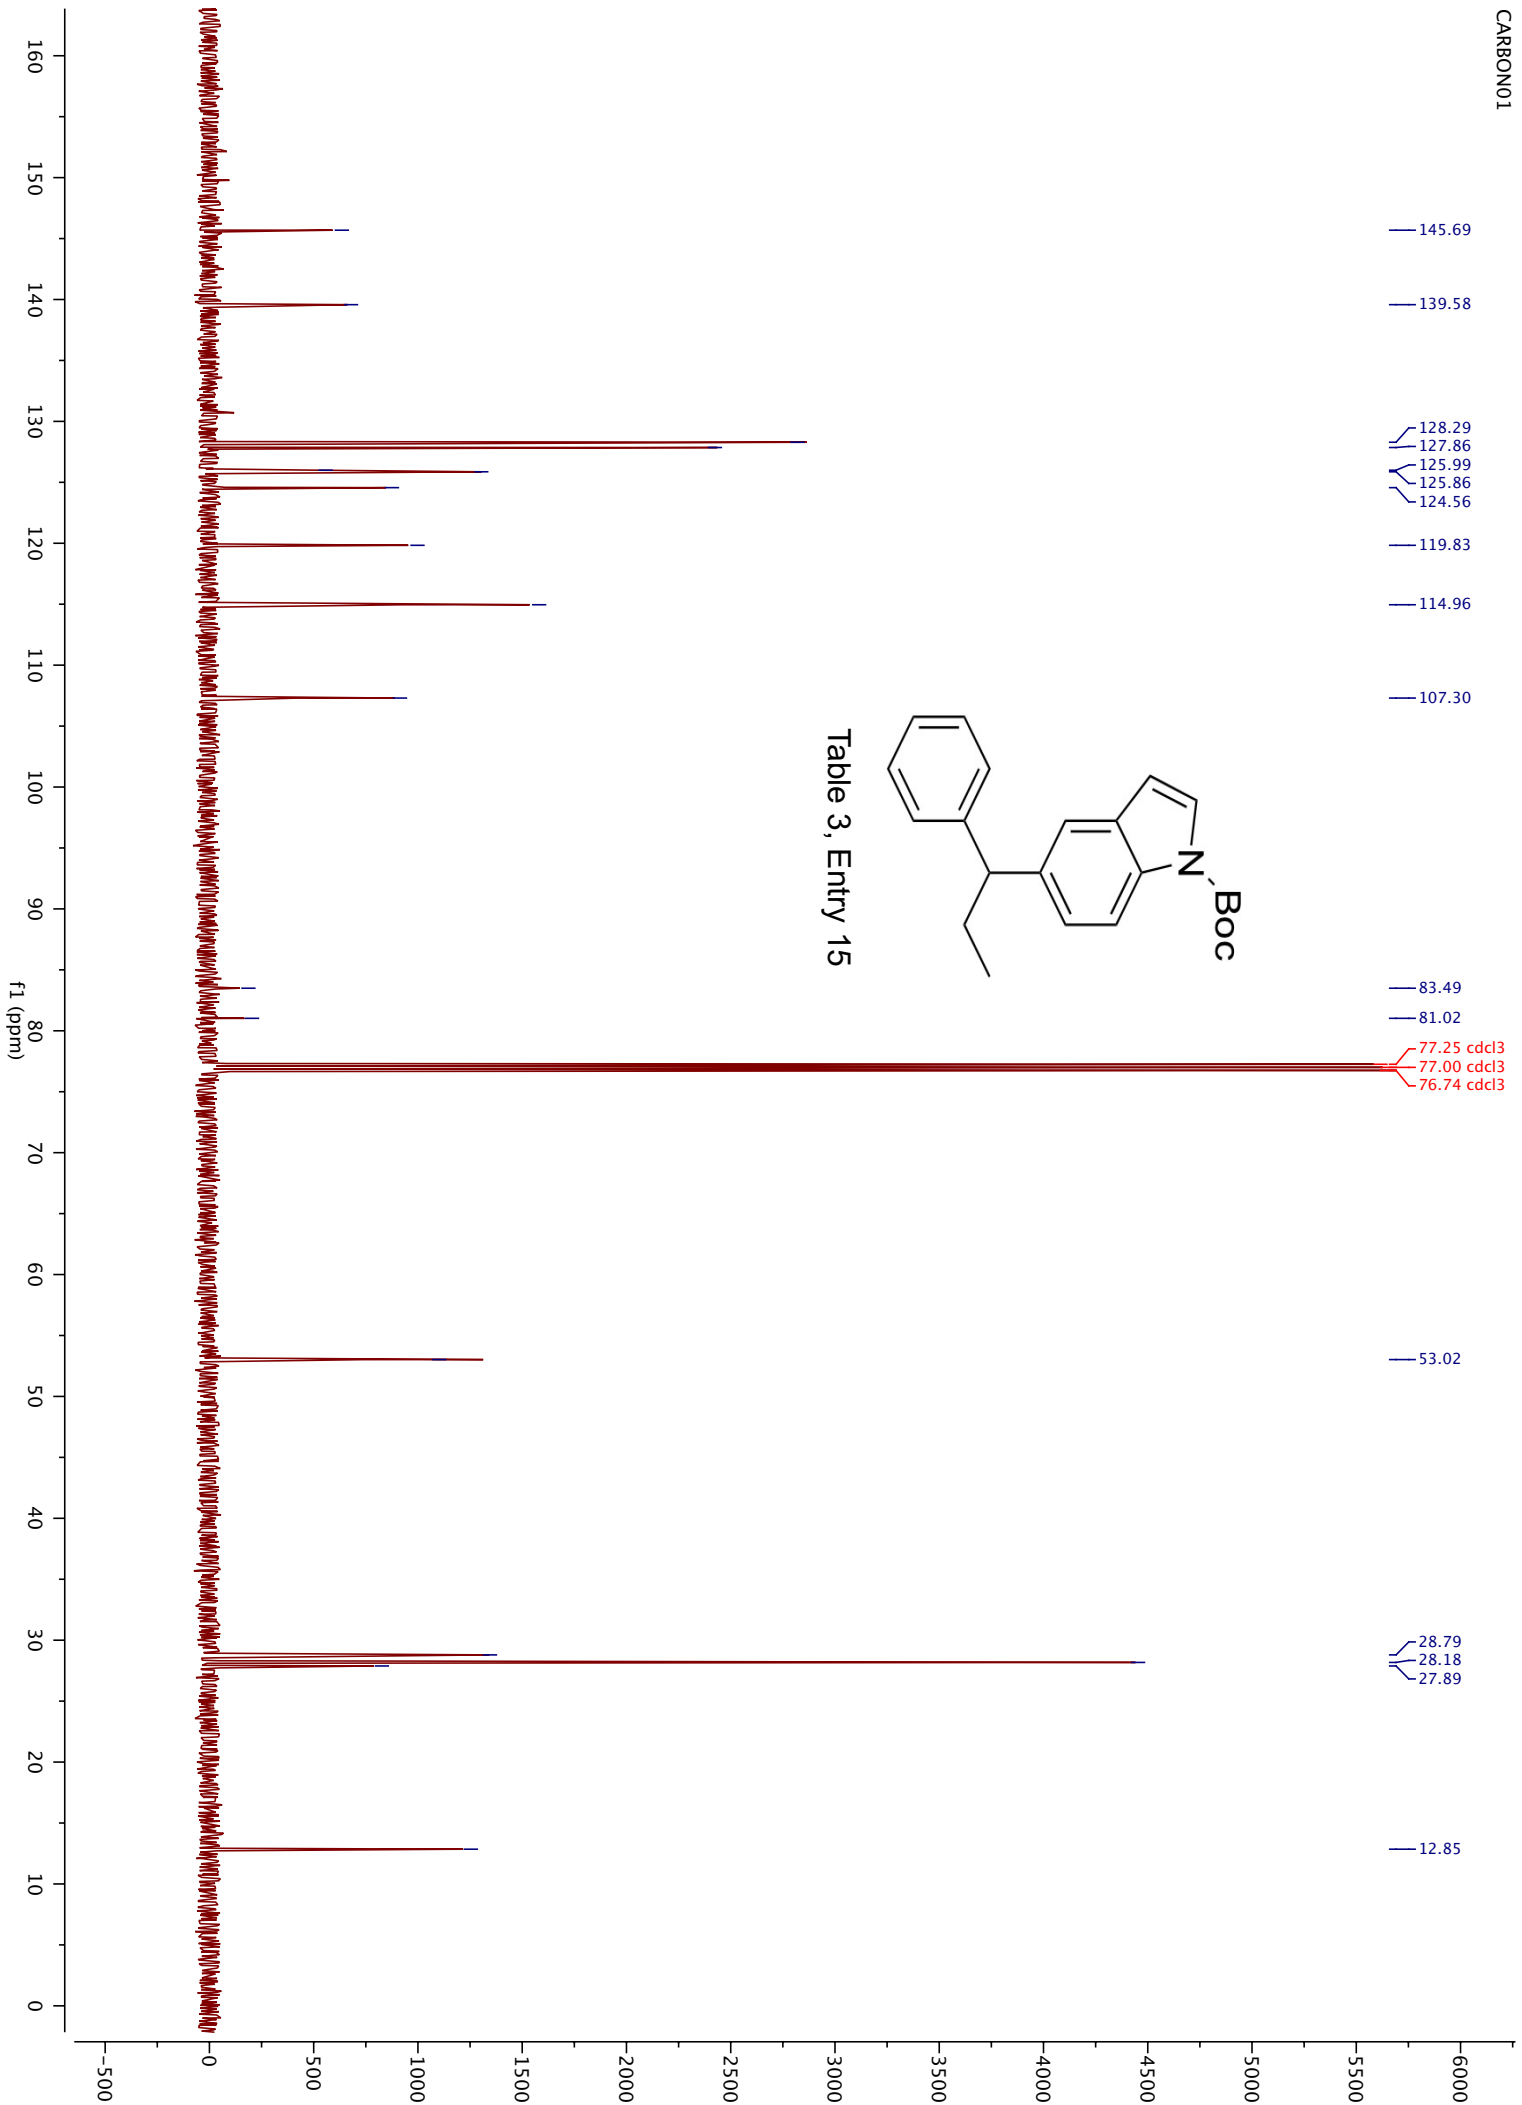

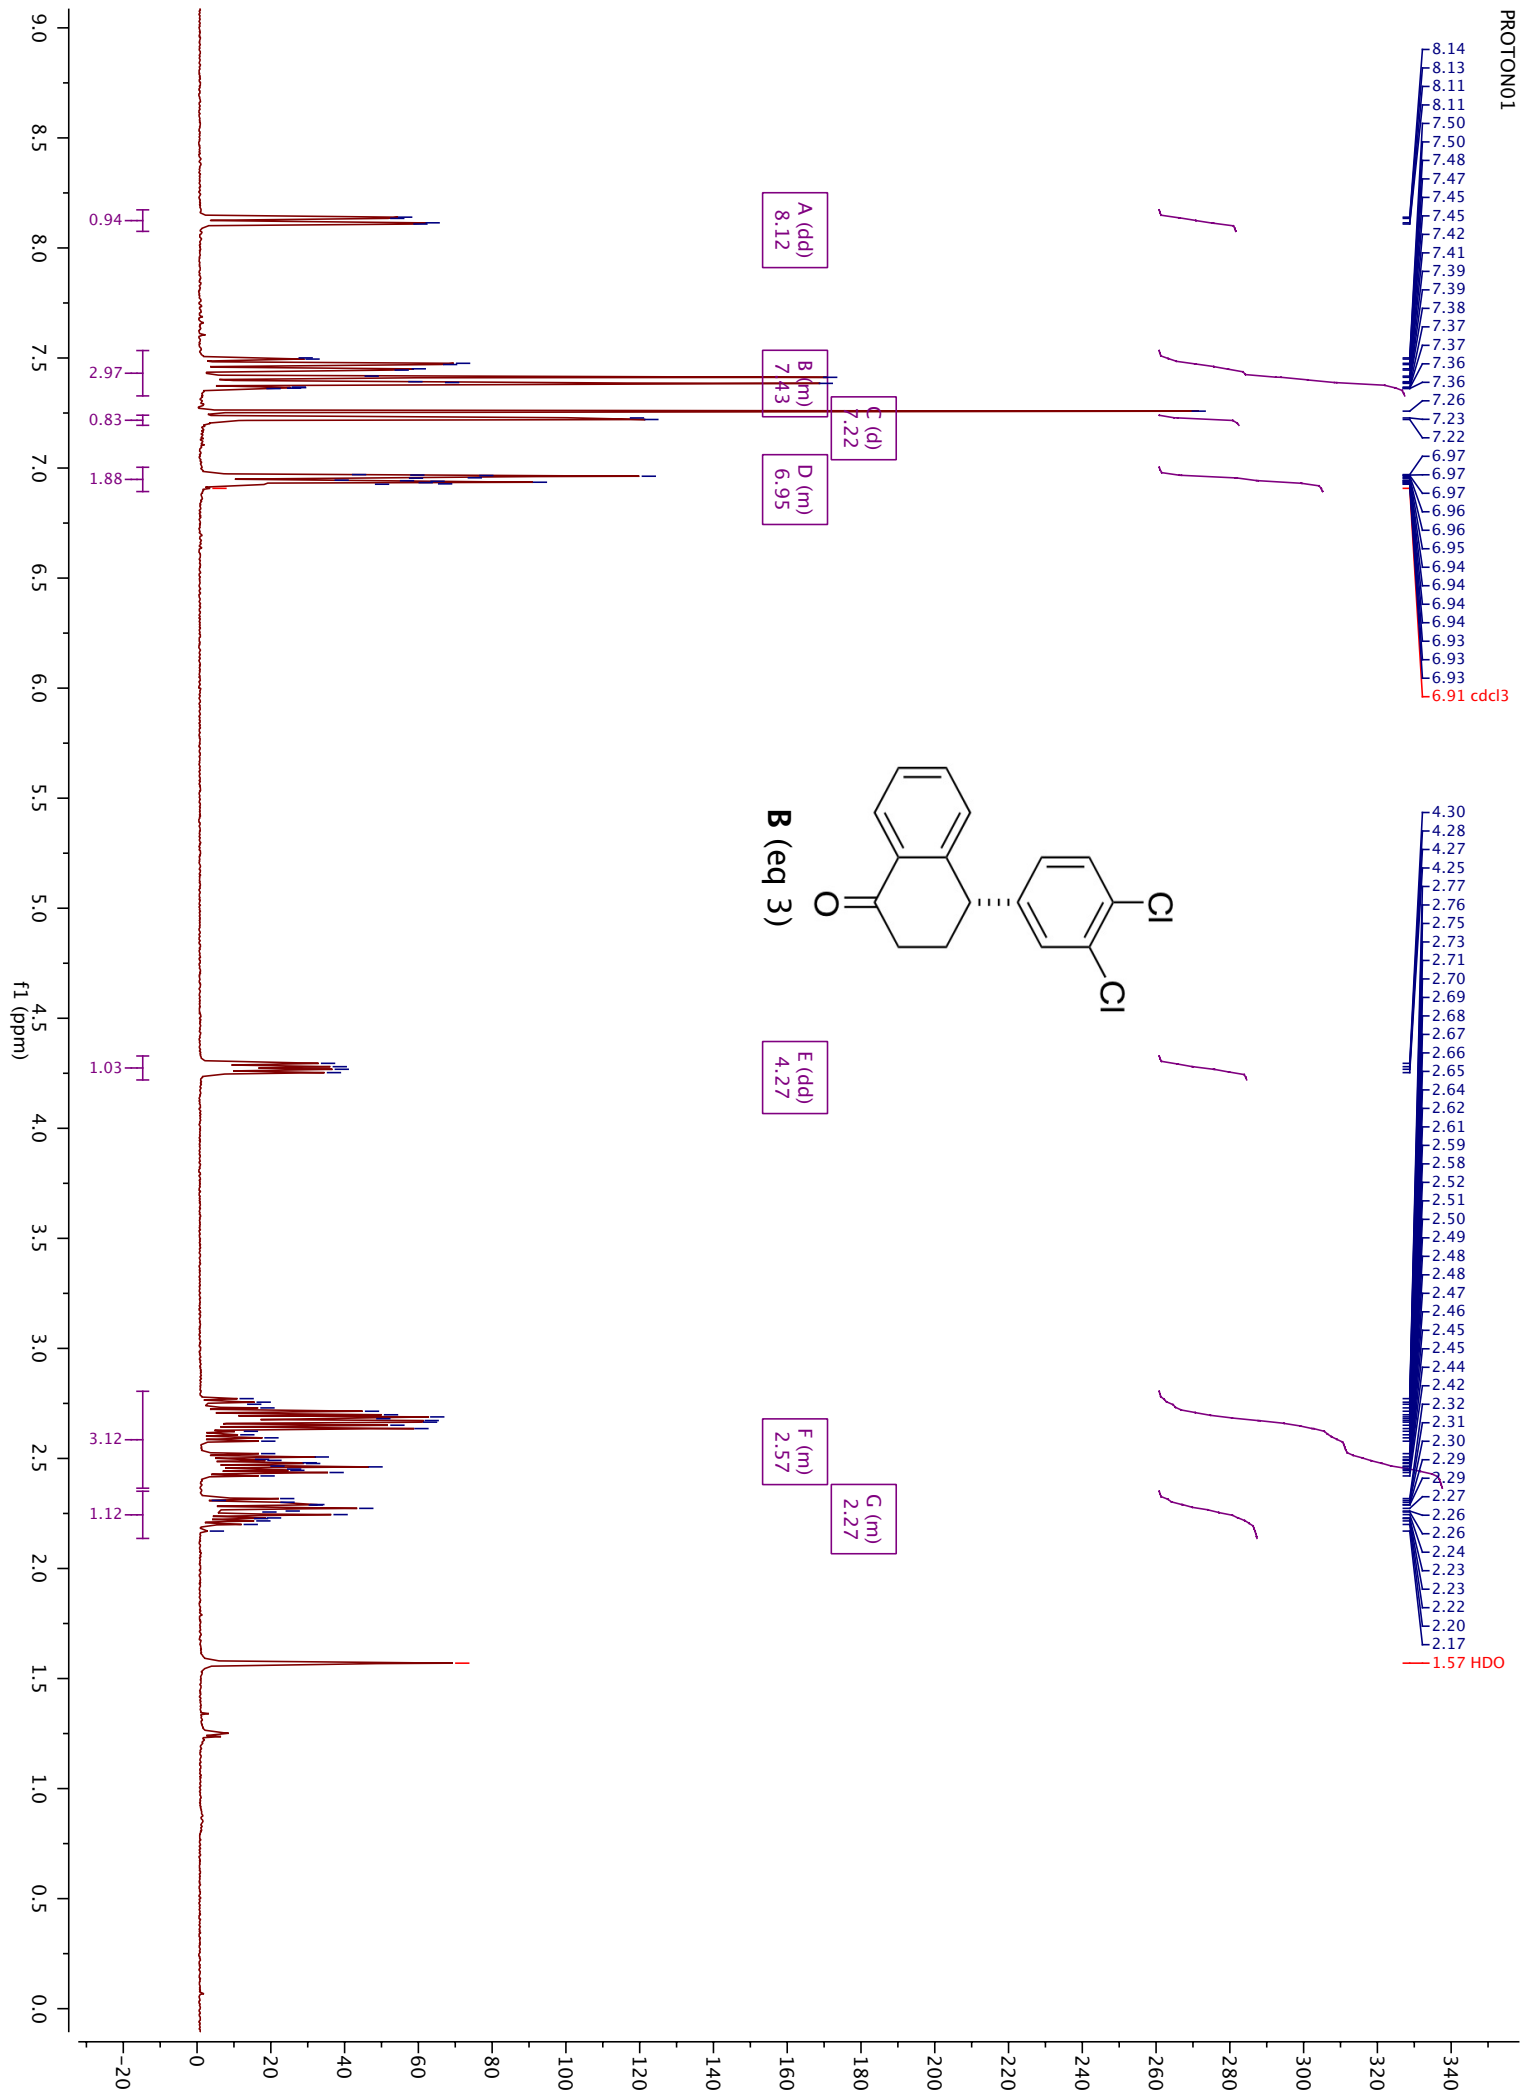

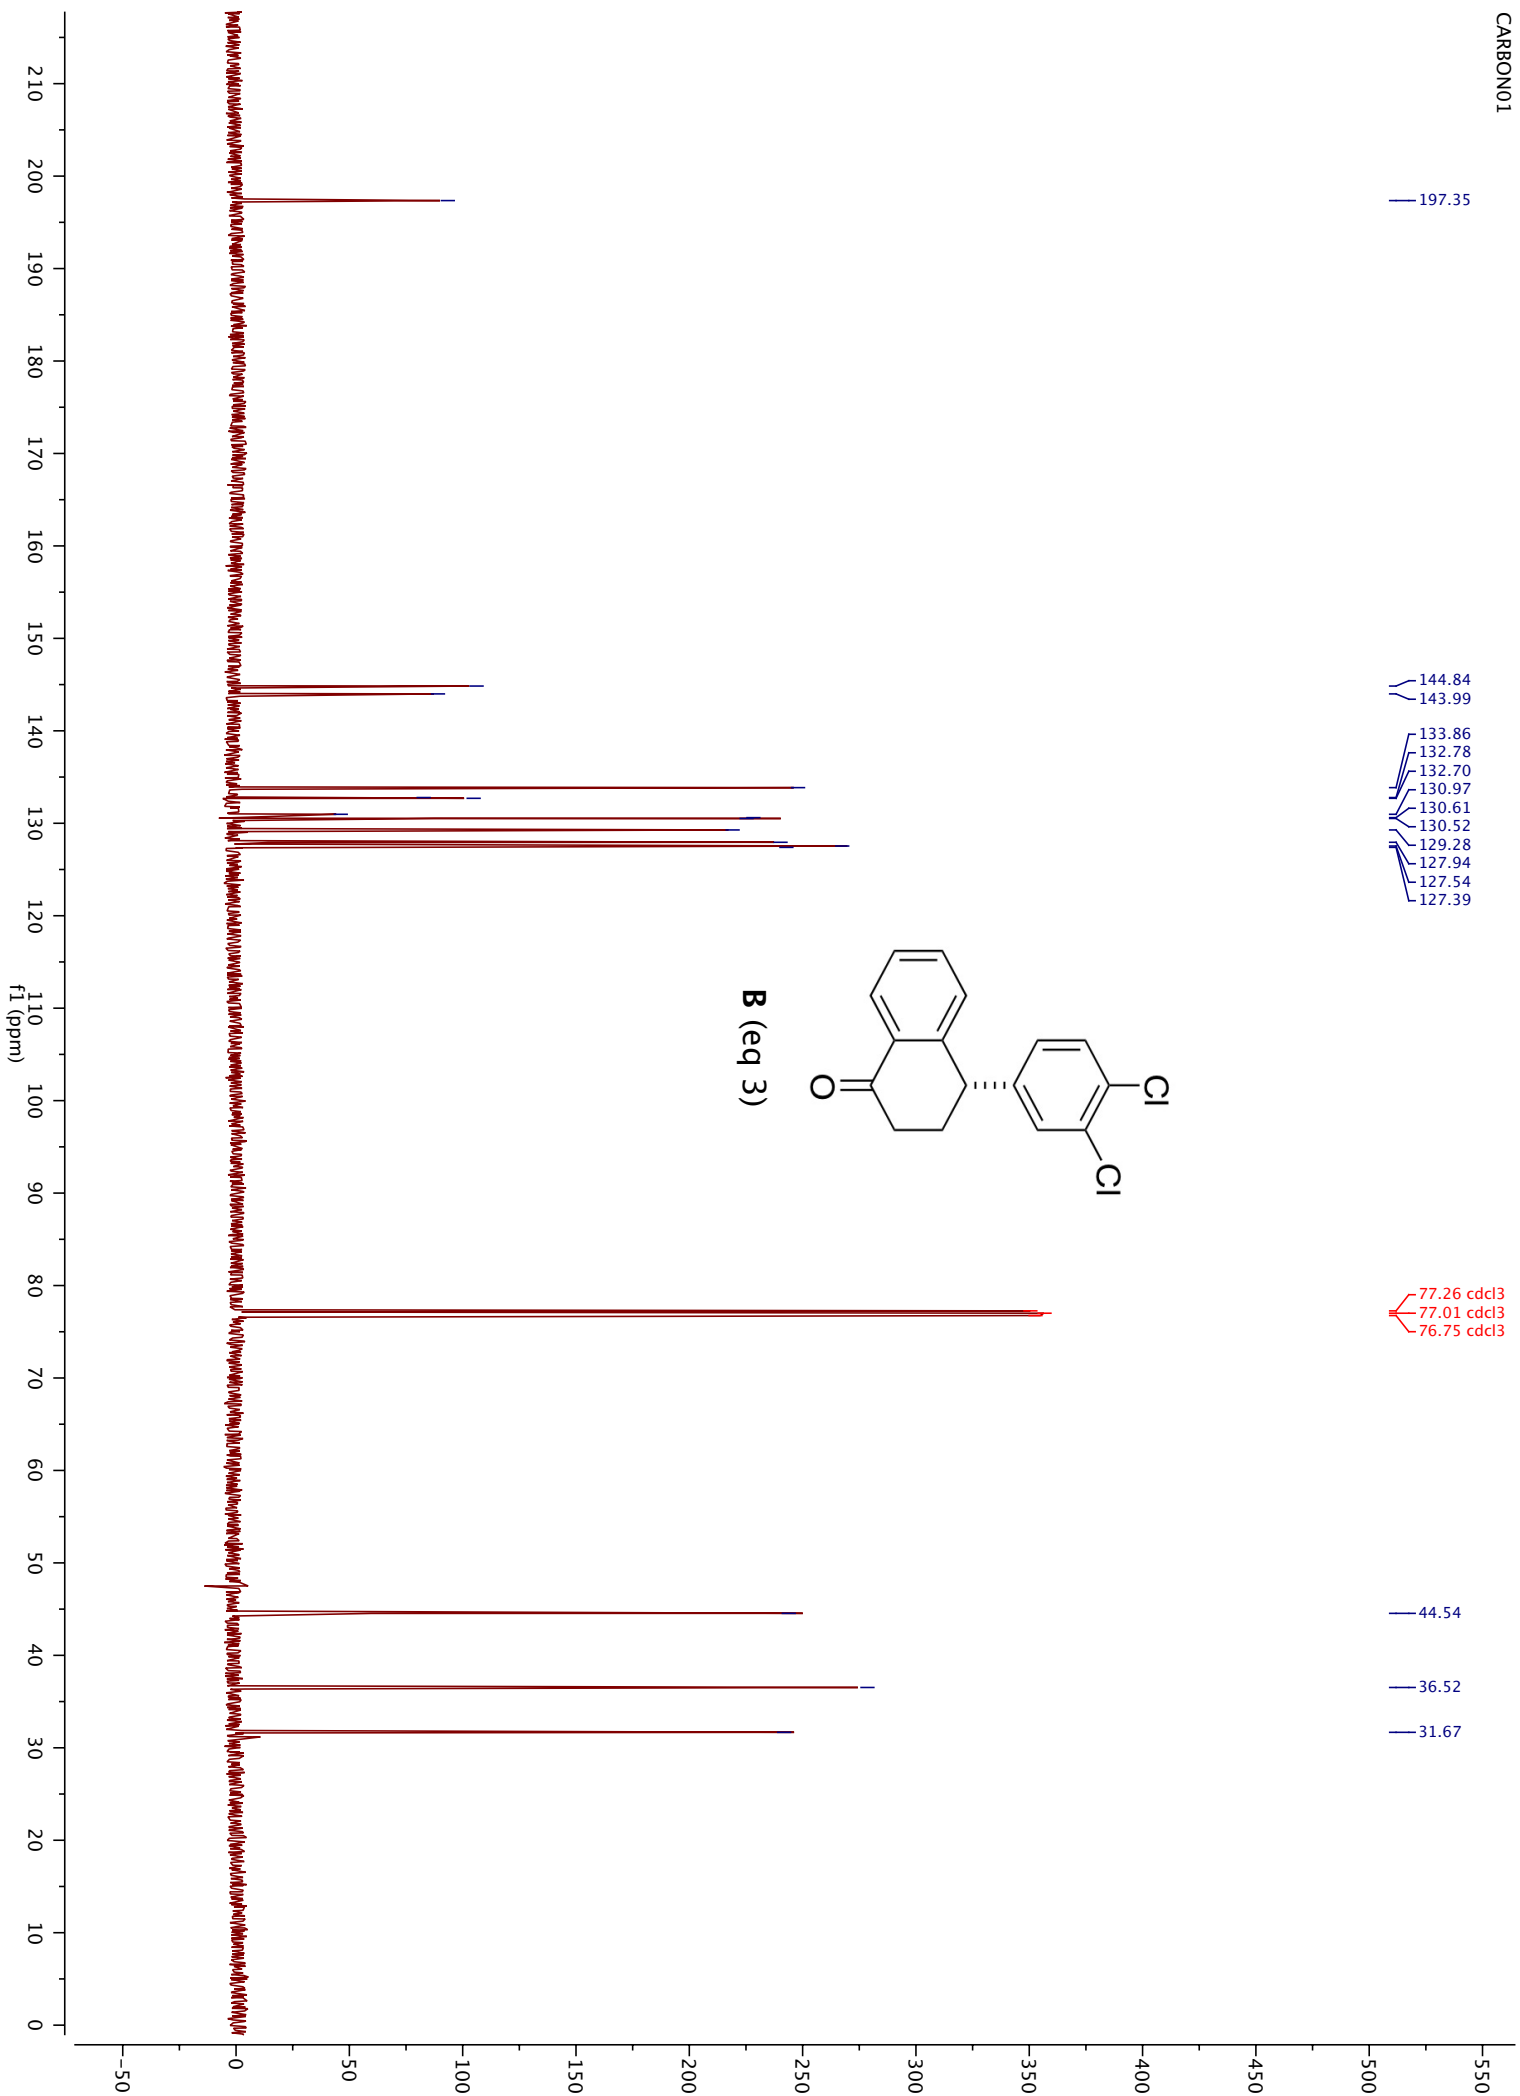

Supplement: NIHMS535721-supplement-1_si_002.pdf [file NIHMS535721-supplement-1_si_002.pdf]
